# Supplementary material
Source: publisher figshare collection journal article supplement (https://gsajournals.figshare.com/ndownloader/files/30688424)
Supplement: Supplementary file 1 [file 30688424]

## Sheet: O157H7_At-4hpi
Dataset S12. KEGG protein IDs assigned to each differentially expressed gene (DEG) using the KofamKOALA blast tool (https://www.genome.jp/tools/kofamkoala/) with a threshold E-value <10E-5. Protein accession, description, and symbol are shown, together with the corresponding KEGG ID and the blast result values [threshold, HMM (Hidden Markov Model) score, and E-value]. Information on DEGs correspo…
Protein accession	Protein description	Symbol	Kegg ID	Threshold	HMM Score	E-value	Kegg description	Gene ID	Log2FC	Adj.P.Val	Gene Name	Gene description
KKF84533.1	pyrimidine monooxygenase		K09018	335.23	638.7	9.6e-193	pyrimidine oxygenase [EC:1.14.99.46]	XF37_06875	8.97756	1.28151e-11		pyrimidine monooxygenase
KKF84532.1	amidohydrolase		K09020	216.1	294.6	3.5e-88	ureidoacrylate peracid hydrolase [EC:3.5.1.110]	XF37_06870	7.23849	2.11594e-10		amidohydrolase
KKF84482.1	aminoacrylate peracid reductase		K09021	139.97	234.4	8.1e-71	aminoacrylate peracid reductase	XF37_06865	6.50365	3.945e-07		aminoacrylate peracid reductase
KKF84481.1	aminoacrylate hydrolase		K09023	215.3	390.4	1.2e-117	aminoacrylate hydrolase [EC:3.5.1.-]	XF37_06860	6.36511	1.82968e-11		aminoacrylate hydrolase
KKF82736.1	biofilm-dependent modulation protein		K21976	54.4	23.6	1e-05	probable RcsB/C two-component-system connector, global regulator of bio	XF37_15995	6.10359	9.00913e-15		biofilm-dependent modulation protein
KKF85219.1	gamma-glutamylputrescine synthetase		K09470	581.6	773.2	1.8e-233	gamma-glutamylputrescine synthase [EC:6.3.1.11]	XF37_03360	5.92287	7.83054e-15		gamma-glutamylputrescine synthetase
KKF81925.1	5,10-methylenetetrahydrofolate reductase	metF	K00297	164.67	363.3	7.4e-109	methylenetetrahydrofolate reductase (NADPH) [EC:1.5.1.20]	XF37_20350	5.90658	1.80783e-11	metF	5,10-methylenetetrahydrofolate reductase
KKF84248.1	glycine/betaine ABC transporter ATP-binding protein		K02000	402.97	646.6	2.2e-194	glycine betaine/proline transport system ATP-binding protein [EC:7.6.2.	XF37_09570	5.78933	1.94328e-08		glycine/betaine ABC transporter ATP-binding protein
KKF82182.1	nitrogen regulatory protein P-II 1		K04752	194.27	202.4	6.3e-61	nitrogen regulatory protein P-II 2	XF37_18635	5.67758	1.02466e-10		nitrogen regulatory protein P-II 1
KKF80568.1	ribulokinase		K00853	340.9	946.1	4.6e-285	L-ribulokinase [EC:2.7.1.16]	XF37_27660	5.6394	4.26884e-10		ribulokinase
KKF84480.1	malonic semialdehyde reductase		K09019	159.1	298.2	7.8e-90	3-hydroxypropanoate dehydrogenase [EC:1.1.1.-]	XF37_06855	5.61735	6.15692e-10		malonic semialdehyde reductase
KKF80460.1	galactonate oxidoreductase		K23007	409.83	643.9	1.7e-194	L-galactonate 5-dehydrogenase [EC:1.1.1.414]	XF37_27065	5.36844	1.89969e-06		galactonate oxidoreductase
KKF84897.1	methionine aminotransferase		K14287	433.7	622.9	5e-188	methionine transaminase [EC:2.6.1.88]	XF37_05005	5.36467	2.32143e-10		methionine aminotransferase
KKF82152.1	biotin synthase		K01012	167.97	588.9	1.9e-177	biotin synthase [EC:2.8.1.6]	XF37_20085	5.36285	2.92392e-11		biotin synthase
KKF81985.1	NAD(P)H-dependent FMN reductase		K00299	96.63	176.5	2.8e-52	FMN reductase [EC:1.5.1.38]	XF37_19205	5.3265	1.66211e-07		NAD(P)H-dependent FMN reductase
KKF84534.1	hypothetical protein		K06217	232.93	345.9	1.7e-103	phosphate starvation-inducible protein PhoH and related proteins	XF37_06930	5.24536	4.58722e-17		hypothetical protein
KKF83897.1	quinone oxidoreductase		K19267	123.77	378	2.2e-113	NAD(P)H dehydrogenase (quinone) [EC:1.6.5.2]	XF37_10705	5.22566	4.49442e-12		quinone oxidoreductase
KKF80567.1	sugar isomerase		K01804	157.23	799.4	2.9e-241	L-arabinose isomerase [EC:5.3.1.4]	XF37_27655	5.20879	7.22977e-11		sugar isomerase
KKF82151.1	8-amino-7-oxononanoate synthase		K00652	447.7	510.1	2e-153	8-amino-7-oxononanoate synthase [EC:2.3.1.47]	XF37_20080	5.16761	1.33662e-11		8-amino-7-oxononanoate synthase
KKF84479.1	FMN reductase		K09024	214.37	255	1.2e-76	flavin reductase [EC:1.5.1.-]	XF37_06850	5.13812	2.3998e-07		FMN reductase
KKF84794.1	malate synthase		K01638	119.97	841.5	2e-253	malate synthase [EC:2.3.3.9]	XF37_05565	5.05156	4.64577e-16		malate synthase
KKF82333.1	taurine transporter ATP-binding subunit	tauB	K10831	337.43	381.2	7.4e-115	taurine transport system ATP-binding protein [EC:7.6.2.7]	XF37_18505	5.04943	1.43176e-07	tauB	taurine transporter ATP-binding subunit
KKF82181.1	ammonium transporter		K03320	140.13	453.4	3.7e-136	ammonium transporter, Amt family	XF37_18630	5.03614	1.95494e-11		ammonium transporter
KKF83874.1	sulfate/thiosulfate transporter subunit		K02046	287.73	424.4	8.8e-128	sulfate/thiosulfate transport system permease protein	XF37_10560	4.94012	6.78451e-11		sulfate/thiosulfate transporter subunit
KKF84792.1	isocitrate dehydrogenase	aceK	K00906	372.2	868.6	5.9e-262	isocitrate dehydrogenase kinase/phosphatase [EC:2.7.11.5 3.1.3.-]	XF37_05555	4.89154	3.52558e-12	aceK	isocitrate dehydrogenase
KKF82332.1	taurine ABC transporter substrate-binding protein	tauA	K15551	224.63	449.9	1.6e-135	taurine transport system substrate-binding protein	XF37_18500	4.87637	2.72442e-07	tauA	taurine ABC transporter substrate-binding protein
KKF81385.1	4-hydroxybenzoate transporter		K08195	469.77	556.8	1.2e-167	MFS transporter, AAHS family, 4-hydroxybenzoate transporter	XF37_23525	4.8044	2.54591e-12		4-hydroxybenzoate transporter
KKF82334.1	taurine transporter subunit		K15552	274.67	369.5	3.6e-111	taurine transport system permease protein	XF37_18510	4.79587	9.62764e-08		taurine transporter subunit
KKF84898.1	oxidoreductase		K08317	334.67	521.1	3.3e-157	hydroxycarboxylate dehydrogenase A [EC:1.1.1.-]	XF37_05010	4.75608	5.58437e-09		oxidoreductase
KKF85553.1	transcriptional regulator		K03576	222.63	457.6	6.1e-138	LysR family transcriptional regulator, regulator for metE and metH	XF37_01045	4.68118	7.73988e-10		transcriptional regulator
KKF81386.1	gentisate 1,2-dioxygenase		K00450	172.37	484.6	6.1e-146	gentisate 1,2-dioxygenase [EC:1.13.11.4]	XF37_23530	4.64971	4.98196e-12		gentisate 1,2-dioxygenase
KKF83156.1	superoxide dismutase		K04565	92.37	129.9	4.3e-38	superoxide dismutase, Cu-Zn family [EC:1.15.1.1]	XF37_14195	4.62732	9.03532e-15		superoxide dismutase
KKF85218.1	gamma-glutamyl-gamma-aminobutyrate hydrolase	puuD	K09473	276.17	425.8	1.6e-128	gamma-glutamyl-gamma-aminobutyrate hydrolase [EC:3.5.1.94]	XF37_03355	4.48328	1.77579e-14	puuD	gamma-glutamyl-gamma-aminobutyrate hydrolase
KKF81987.1	alkanesulfonate monooxygenase		K04091	335.63	648.9	1.3e-195	alkanesulfonate monooxygenase [EC:1.14.14.5]	XF37_19215	4.47624	4.99462e-07		alkanesulfonate monooxygenase
KKF81387.1	5-carboxymethyl-2-hydroxymuconate isomerase		K16165	295.37	392.9	4e-118	fumarylpyruvate hydrolase [EC:3.7.1.20]	XF37_23535	4.44711	1.00077e-09		5-carboxymethyl-2-hydroxymuconate isomerase
KKF85552.1	5-methyltetrahydropteroyltriglutamate--homocysteine methyltransferase		K00549	51.6	791.2	1.9e-238	5-methyltetrahydropteroyltriglutamate--homocysteine methyltransferase [	XF37_01040	4.40538	1.14958e-12		5-methyltetrahydropteroyltriglutamate--homocysteine methyltransferase
KKF84186.1	sulfate adenylyltransferase subunit 2		K00957	192	591.7	6.8e-178	sulfate adenylyltransferase subunit 2 [EC:2.7.7.4]	XF37_09195	4.36386	4.60927e-11		sulfate adenylyltransferase subunit 2
KKF82291.1	LacI family transcriptional regulator		K02058	203.5	219	3.8e-65	simple sugar transport system substrate-binding protein	XF37_18280	4.35146	1.3824e-14		LacI family transcriptional regulator
KKF82150.1	biotin biosynthesis protein BioC		K02169	170.13	292.2	1.8e-87	malonyl-CoA O-methyltransferase [EC:2.1.1.197]	XF37_20075	4.30704	7.16904e-10		biotin biosynthesis protein BioC
KKF83526.1	general stress protein		K05520	183.87	239.1	2.1e-71	protease I [EC:3.5.1.124]	XF37_11635	4.30339	1.34242e-11		general stress protein
KKF81986.1	alkanesulfonate transporter substrate-binding subunit		K15553	211.97	395.7	8.7e-119	sulfonate transport system substrate-binding protein	XF37_19210	4.28215	9.58703e-06		alkanesulfonate transporter substrate-binding subunit
KKF80566.1	ribulose 5-phosphate epimerase	araD	K03077	214.67	286.8	1e-85	L-ribulose-5-phosphate 4-epimerase [EC:5.1.3.4]	XF37_27650	4.26702	1.32659e-08	araD	ribulose 5-phosphate epimerase
KKF84795.1	homoserine O-succinyltransferase		K00651	262.33	470.6	2.4e-141	homoserine O-succinyltransferase/O-acetyltransferase [EC:2.3.1.46 2.3.1	XF37_05570	4.24697	1.47208e-08		homoserine O-succinyltransferase
KKF84793.1	isocitrate lyase		K01637	199.87	730.6	7e-220	isocitrate lyase [EC:4.1.3.1]	XF37_05560	4.23715	1.42395e-15		isocitrate lyase
KKF81389.1	salicylate hydroxylase		K22270	438.5	589	1.1e-177	3-hydroxybenzoate 6-monooxygenase [EC:1.14.13.24]	XF37_23545	4.20174	1.3824e-14		salicylate hydroxylase
KKF85217.1	transcriptional regulator		K14056	155.93	308.8	3e-93	HTH-type transcriptional regulator, repressor for puuD	XF37_03350	4.19922	1.26151e-11		transcriptional regulator
KKF85220.1	Putrescine importer PuuP		K14052	360.07	675.5	8.8e-204	putrescine importer	XF37_03365	4.12253	1.70878e-08		Putrescine importer PuuP
KKF81388.1	maleylacetoacetate isomerase		K01801	313.07	323.3	1.8e-97	maleylpyruvate isomerase [EC:5.2.1.4]	XF37_23540	4.08024	6.03564e-10		maleylacetoacetate isomerase
KKF83765.1	transcriptional regulator		K05817	298.17	396.4	2.5e-119	LysR family transcriptional regulator, hca operon transcriptional activ	XF37_10000	4.03714	9.688e-09		transcriptional regulator
KKF85276.1	indole-3-glycerol phosphate synthase		K13498	404.93	696.5	4.2e-210	indole-3-glycerol phosphate synthase / phosphoribosylanthranilate isome	XF37_03585	3.99225	8.48713e-17		indole-3-glycerol phosphate synthase
KKF84187.1	sulfate adenylyltransferase subunit 1	cysN	K00956	537.07	736.5	5.7e-222	sulfate adenylyltransferase subunit 1 [EC:2.7.7.4]	XF37_09200	3.9684	2.70895e-14	cysN	sulfate adenylyltransferase subunit 1
KKF82153.1	adenosylmethionine-8-amino-7-oxononanoate aminotransferase		K00833	434.53	683.5	5.6e-206	adenosylmethionine---8-amino-7-oxononanoate aminotransferase [EC:2.6.1.	XF37_20090	3.96699	1.02442e-07		adenosylmethionine-8-amino-7-oxononanoate aminotransferase
KKF83669.1	oxidoreductase		K00059	270.83	240.1	1.2e-71	3-oxoacyl-[acyl-carrier protein] reductase [EC:1.1.1.100]	XF37_12390	3.9381	2.25933e-12		oxidoreductase
KKF82179.1	hypothetical protein		K09914	69.93	176.5	3.1e-52	putative lipoprotein	XF37_18620	3.93527	3.65414e-16		hypothetical protein
KKF83873.1	thiosulfate transporter subunit		K02048	513.87	547.4	3.4e-165	sulfate/thiosulfate transport system substrate-binding protein	XF37_10555	3.92952	1.0902e-13		thiosulfate transporter subunit
KKF84247.1	glycine/betaine ABC transporter permease		K02001	283	507.8	1.8e-152	glycine betaine/proline transport system permease protein	XF37_09565	3.92621	2.02118e-07		glycine/betaine ABC transporter permease
KKF82391.1	sulfate transporter subunit		K23163	485.7	563.5	7.4e-170	sulfate/thiosulfate transport system substrate-binding protein	XF37_17600	3.8898	5.84709e-11		sulfate transporter subunit
KKF80959.1	transcriptional regulator		K13631	152.2	179.2	6.9e-54	AraC family transcriptional regulator, mar-sox-rob regulon activator	XF37_24715	3.88252	2.38119e-11		transcriptional regulator
KKF80458.1	L-galactonate transporter		K23016	824.9	890.9	4e-269	MFS transporter, ACS family, L-galactonate transporter	XF37_27055	3.88125	4.8797e-09		L-galactonate transporter
KKF80475.1	periplasmic protein		K04065	50.03	189.3	4.1e-56	hyperosmotically inducible periplasmic protein	XF37_27155	3.84225	7.83054e-15		periplasmic protein
KKF85216.1	aldehyde dehydrogenase		K09472	661.23	786	3.8e-237	4-(gamma-glutamylamino)butanal dehydrogenase [EC:1.2.1.99]	XF37_03345	3.78392	4.52086e-13		aldehyde dehydrogenase
KKF83875.1	sulfate/thiosulfate transporter permease subunit	cysW	K02047	288.07	438.8	3.3e-132	sulfate/thiosulfate transport system permease protein	XF37_10565	3.76977	2.81781e-12	cysW	sulfate/thiosulfate transporter permease subunit
KKF83699.1	putrescine--2-oxoglutarate aminotransferase		K09251	498.1	686.1	5.1e-207	putrescine aminotransferase [EC:2.6.1.82]	XF37_12035	3.76474	5.18892e-15		putrescine--2-oxoglutarate aminotransferase
KKF83010.1	transcriptional regulator		K04064	61.37	161	3.3e-48	osmotically inducible lipoprotein OsmE	XF37_14675	3.75326	4.64577e-16		transcriptional regulator
KKF83019.1	arginine succinyltransferase		K00673	207.13	552.2	2.4e-166	arginine N-succinyltransferase [EC:2.3.1.109]	XF37_14720	3.73116	3.78338e-10		arginine succinyltransferase
KKF82754.1	nitrate reductase	narI	K00374	64.83	368.4	1.7e-110	nitrate reductase gamma subunit [EC:1.7.5.1 1.7.99.-]	XF37_16085	3.72045	2.33909e-07	narI	nitrate reductase
KKF82335.1	taurine dioxygenase	tauD	K03119	337.93	444.1	1.3e-133	taurine dioxygenase [EC:1.14.11.17]	XF37_18515	3.70119	7.6006e-05	tauD	taurine dioxygenase
KKF83020.1	acetylornithine aminotransferase		K00840	705.33	757.1	9.6e-229	succinylornithine aminotransferase [EC:2.6.1.81]	XF37_14725	3.67457	2.06389e-13		acetylornithine aminotransferase
KKF84573.1	sugar ABC transporter substrate-binding protein		K10537	442.4	521.5	2.5e-157	L-arabinose transport system substrate-binding protein	XF37_06620	3.64579	3.29395e-09		sugar ABC transporter substrate-binding protein
KKF84402.1	formyl-coenzyme A transferase		K07749	479.1	577.1	5.2e-174	formyl-CoA transferase [EC:2.8.3.16]	XF37_07280	3.63388	3.23141e-07		formyl-coenzyme A transferase
KKF84188.1	adenylylsulfate kinase		K00860	325.47	328.9	1.5e-98	adenylylsulfate kinase [EC:2.7.1.25]	XF37_09205	3.5873	5.21705e-06		adenylylsulfate kinase
KKF81744.1	leucine/isoleucine/valine transporter ATP-binding subunit	livF	K01996	328.4	423.6	4.9e-127	branched-chain amino acid transport system ATP-binding protein	XF37_21725	3.58714	6.9612e-06	livF	leucine/isoleucine/valine transporter ATP-binding subunit
KKF82149.1	dethiobiotin synthetase	bioD	K01935	120.6	281.3	3.6e-84	dethiobiotin synthetase [EC:6.3.3.3]	XF37_20070	3.54162	2.90002e-08	bioD	dethiobiotin synthetase
KKF82124.1	hypothetical protein		K12151	91.6	99.4	4.3e-29	multiple stress resistance protein BhsA	XF37_19940	3.52246	5.60612e-07		hypothetical protein
KKF82752.1	nitrate reductase	narH	K00371	267.77	969	4.4e-292	nitrate reductase / nitrite oxidoreductase, beta subunit [EC:1.7.5.1 1.	XF37_16075	3.50616	8.33889e-14	narH	nitrate reductase
KKF81630.1	leucine/isoleucine/valine transporter ATP-binding subunit	livG	K01995	323.27	445	1.6e-133	branched-chain amino acid transport system ATP-binding protein	XF37_21720	3.46392	1.84387e-05	livG	leucine/isoleucine/valine transporter ATP-binding subunit
KKF82753.1	nitrate reductase		K00374	64.83	457.9	1.2e-137	nitrate reductase gamma subunit [EC:1.7.5.1 1.7.99.-]	XF37_16080	3.44621	4.60927e-11		nitrate reductase
KKF84174.1	sulfite reductase subunit alpha	cysJ	K00380	515.87	720	1.4e-216	sulfite reductase (NADPH) flavoprotein alpha-component [EC:1.8.1.2]	XF37_09130	3.43886	9.11126e-14	cysJ	sulfite reductase subunit alpha
KKF85261.1	glutamine amidotransferase		K13497	599.8	779.3	5.2e-235	anthranilate synthase/phosphoribosyltransferase [EC:4.1.3.27 2.4.2.18]	XF37_03580	3.42674	5.18318e-14		glutamine amidotransferase
KKF85538.1	3-ketoacyl-CoA thiolase	fadA	K00632	502.97	559	3e-168	acetyl-CoA acyltransferase [EC:2.3.1.16]	XF37_00970	3.39225	1.52597e-11	fadA	3-ketoacyl-CoA thiolase
KKF82737.1	30S ribosomal subunit S22	rpsV	K02972	69.93	97.2	1.4e-28	stationary-phase-induced ribosome-associated protein	XF37_16000	3.3798	4.13301e-10	rpsV	30S ribosomal subunit S22
KKF81393.1	oxidoreductase		K00034	343.6	286.3	6.8e-86	glucose 1-dehydrogenase [EC:1.1.1.47]	XF37_23565	3.3544	2.01146e-06		oxidoreductase
KKF84703.1	acyl-CoA dehydrogenase	fadE	K06445	287.33	1312.4	0	acyl-CoA dehydrogenase [EC:1.3.99.-]	XF37_05835	3.34535	4.18531e-15	fadE	acyl-CoA dehydrogenase
KKF80987.1	D-ribose transporter ATP-binding protein		K10441	708.03	751.2	5.7e-226	ribose transport system ATP-binding protein [EC:7.5.2.7]	XF37_24865	3.34522	9.51294e-10		D-ribose transporter ATP-binding protein
KKF85263.1	tryptophan synthase subunit alpha		K01695	86.27	354.3	3.3e-106	tryptophan synthase alpha chain [EC:4.2.1.20]	XF37_03595	3.32312	1.19859e-08		tryptophan synthase subunit alpha
KKF85215.1	gamma-glutamylputrescine oxidoreductase		K09471	306.03	579.7	2.3e-174	gamma-glutamylputrescine oxidase [EC:1.4.3.-]	XF37_03340	3.30625	5.44683e-10		gamma-glutamylputrescine oxidoreductase
KKF81623.1	leucine ABC transporter substrate-binding protein		K01999	166.7	260.9	8.5e-78	branched-chain amino acid transport system substrate-binding protein	XF37_21685	3.29244	3.59347e-09		leucine ABC transporter substrate-binding protein
KKF82750.1	nitrate/nitrite transporter NarK		K02575	163.53	423	5e-127	MFS transporter, NNP family, nitrate/nitrite transporter	XF37_16065	3.28589	9.03532e-15		nitrate/nitrite transporter NarK
KKF82037.1	stationary phase/starvation inducible regulatory protein CspD		K03704	85.93	115.1	1.3e-33	cold shock protein	XF37_19485	3.28173	2.38958e-10		stationary phase/starvation inducible regulatory protein CspD
KKF84268.1	carbon starvation induced protein		K15737	322.13	571.6	1.1e-172	glutarate dioxygenase [EC:1.14.11.64]	XF37_09670	3.27188	3.90271e-10		carbon starvation induced protein
KKF81844.1	biofilm formation regulatory protein BssS	bssS	K12148	65.5	157.4	5.6e-47	biofilm regulator BssS	XF37_20840	3.2674	2.82906e-15	bssS	biofilm formation regulatory protein BssS
KKF85537.1	multifunctional fatty acid oxidation complex subunit alpha	fadB	K01825	737.7	1268.9	0	3-hydroxyacyl-CoA dehydrogenase / enoyl-CoA hydratase / 3-hydroxybutyry	XF37_00965	3.24883	2.2913e-15	fadB	multifunctional fatty acid oxidation complex subunit alpha
KKF84571.1	L-arabinose transporter permease	araH	K10538	342.73	554.4	2e-167	L-arabinose transport system permease protein	XF37_06610	3.24549	9.91586e-07	araH	L-arabinose transporter permease
KKF83584.1	glucuronate isomerase		K01812	229.93	694.1	7.3e-209	glucuronate isomerase [EC:5.3.1.12]	XF37_11935	3.23352	2.2432e-12		glucuronate isomerase
KKF83876.1	sulfate/thiosulfate transporter subunit		K02045	427.77	508.3	5.5e-153	sulfate/thiosulfate transport system ATP-binding protein [EC:7.3.2.3]	XF37_10570	3.22653	1.22921e-13		sulfate/thiosulfate transporter subunit
KKF85432.1	SpoVR family protein		K06415	268.1	684.8	2.8e-206	stage V sporulation protein R	XF37_02010	3.21992	1.13954e-14		SpoVR family protein
KKF84325.1	autoinducer kinase		K11216	404.97	865.3	5.1e-261	autoinducer-2 kinase [EC:2.7.1.189]	XF37_07660	3.21713	1.35911e-11		autoinducer kinase
KKF83630.1	dioxygenase		K15777	97.6	346.5	4.9e-104	4,5-DOPA dioxygenase extradiol [EC:1.13.11.-]	XF37_12195	3.20526	6.28671e-05		dioxygenase
KKF81928.1	cystathionine gamma-synthase		K01758	591.6	471	1.1e-141	cystathionine gamma-lyase [EC:4.4.1.1]	XF37_20365	3.20345	3.66055e-10		cystathionine gamma-synthase
KKF81629.1	leucine/isoleucine/valine transporter permease subunit	livM	K01998	253	391	3.3e-117	branched-chain amino acid transport system permease protein	XF37_21715	3.18571	9.0716e-07	livM	leucine/isoleucine/valine transporter permease subunit
KKF85210.1	phage-shock protein		K03971	52.7	126.3	9.1e-38	phage shock protein D	XF37_03310	3.18267	2.82501e-06		phage-shock protein
KKF85262.1	tryptophan synthase subunit beta		K01696	638.33	679.3	9.8e-205	tryptophan synthase beta chain [EC:4.2.1.20]	XF37_03590	3.16763	3.46523e-14		tryptophan synthase subunit beta
KKF82198.1	transcriptional regulator BolA		K05527	70.47	143.6	1.2e-42	BolA family transcriptional regulator, general stress-responsive regula	XF37_18715	3.13948	5.30115e-14		transcriptional regulator BolA
KKF82751.1	nitrate reductase	narZ	K00370	777.47	2206.6	0	nitrate reductase / nitrite oxidoreductase, alpha subunit [EC:1.7.5.1 1	XF37_16070	3.13451	6.62626e-15	narZ	nitrate reductase
KKF81531.1	nitrogen assimilation transcriptional regulator		K19338	274.07	313.4	8.5e-94	LysR family transcriptional regulator, nitrogen assimilation regulatory	XF37_22335	3.12724	1.85877e-08		nitrogen assimilation transcriptional regulator
KKF83057.1	serine/threonine protein kinase		K07180	365.83	804.5	2e-242	serine protein kinase	XF37_14920	3.11842	9.03532e-15		serine/threonine protein kinase
KKF83912.1	sugar ABC transporter substrate-binding protein		K23508	298.7	412.6	4.1e-124	galactofuranose transport system substrate-binding protein	XF37_10785	3.11499	2.43212e-14		sugar ABC transporter substrate-binding protein
KKF82950.1	murein L,D-transpeptidase		K19236	411.47	381.4	1e-114	L,D-transpeptidase YcfS	XF37_14360	3.09433	2.38592e-13		murein L,D-transpeptidase
KKF83058.1	hypothetical protein		K09786	219.97	547.6	5.6e-165	uncharacterized protein	XF37_14925	3.09269	2.63847e-14		hypothetical protein
KKF85213.1	phage shock protein		K03969	99.37	213	2.7e-63	phage shock protein A	XF37_03325	3.08988	1.95785e-11		phage shock protein
KKF80822.1	glyoxylate carboligase		K01608	686.37	1136.9	0	tartronate-semialdehyde synthase [EC:4.1.1.47]	XF37_25970	3.07362	9.91218e-08		glyoxylate carboligase
KKF81988.1	alkanesulfonate transporter permease subunit	ssuC	K15554	280.67	359.1	1e-107	sulfonate transport system permease protein	XF37_19220	3.06776	0.000100256	ssuC	alkanesulfonate transporter permease subunit
KKF85292.1	transporter		K08172	485.07	460.8	1.6e-138	MFS transporter, MHS family, shikimate and dehydroshikimate transport p	XF37_02545	3.04385	2.8569e-06		transporter
KKF81631.1	membrane protein		K23424	174.57	35.4	1.5e-09	protein O-mannosyl-transferase [EC:2.4.1.-]	XF37_21730	3.03982	6.87398e-05		membrane protein
KKF85134.1	hypothetical protein		K09794	27.7	86.4	5e-25	uncharacterized protein	XF37_02910	3.02305	2.84737e-12		hypothetical protein
KKF81532.1	transcriptional regulator Cbl	cbl	K13635	458.93	523.7	4.2e-158	LysR family transcriptional regulator, cys regulon transcriptional acti	XF37_22340	2.98247	1.17501e-08	cbl	transcriptional regulator Cbl
KKF85151.1	FMN-dependent NADH-azoreductase		K01118	84.33	301.4	2.5e-90	FMN-dependent NADH-azoreductase [EC:1.7.1.17]	XF37_02995	2.97289	1.88446e-07		FMN-dependent NADH-azoreductase
KKF83936.1	ornithine carbamoyltransferase		K00611	319.53	492.7	3.2e-148	ornithine carbamoyltransferase [EC:2.1.3.3]	XF37_10910	2.96537	7.41119e-11		ornithine carbamoyltransferase
KKF84175.1	sulfite reductase subunit beta		K00381	579.57	842.4	1.3e-253	sulfite reductase (NADPH) hemoprotein beta-component [EC:1.8.1.2]	XF37_09135	2.96492	2.7679e-10		sulfite reductase subunit beta
KKF83913.1	sugar ABC transporter permease		K23509	332.03	452.2	3.6e-136	galactofuranose transport system permease protein	XF37_10795	2.96135	1.34896e-07		sugar ABC transporter permease
KKF84255.1	hypothetical protein		K05594	43.73	72.7	1.1e-20	ElaB protein	XF37_09605	2.95821	2.20096e-12		hypothetical protein
KKF84733.1	terminase		K21512	243.87	209.1	3.2e-62	terminase, large subunit [EC:3.1.21.4]	XF37_05625	2.95082	0.00448766		terminase
KKF85632.1	hypothetical protein		K01356	134.7	70.4	6.7e-20	repressor LexA [EC:3.4.21.88]	XF37_00805	2.95082	0.000645791		hypothetical protein
KKF83594.1	2,4-dienoyl-CoA reductase		K00219	571.93	1158.2	0	2,4-dienoyl-CoA reductase (NADPH2) [EC:1.3.1.34]	XF37_11995	2.94804	6.16819e-10		2,4-dienoyl-CoA reductase
KKF84403.1	oxalyl-CoA decarboxylase		K01577	824.4	989.4	1.5e-298	oxalyl-CoA decarboxylase [EC:4.1.1.8]	XF37_07285	2.94005	1.8525e-06		oxalyl-CoA decarboxylase
KKF85211.1	transcriptional regulator		K03973	30.9	77.1	4e-22	phage shock protein C	XF37_03315	2.91952	7.40529e-07		transcriptional regulator
KKF83571.1	pirin		K06911	33	58.2	2.8e-16	quercetin 2,3-dioxygenase [EC:1.13.11.24]	XF37_11865	2.91003	0.00181637		pirin
KKF85212.1	phage shock protein	pspB	K03970	30.03	105.1	4.5e-31	phage shock protein B	XF37_03320	2.90783	3.97027e-07	pspB	phage shock protein
KKF84374.1	exonuclease		K01143	-	436.8	5.3e-132	exodeoxyribonuclease (lambda-induced) [EC:3.1.11.3]	XF37_07525	2.86681	2.38728e-06		exonuclease
KKF84767.1	phosphate-starvation-inducible protein PsiE		K13256	35.63	156.8	1.2e-46	protein PsiE	XF37_05430	2.86226	1.61193e-06		phosphate-starvation-inducible protein PsiE
KKF81081.1	hypothetical protein		K21740	84.83	31.2	5.2e-08	reactive chlorine resistance protein B	XF37_25385	2.84157	7.73988e-10		hypothetical protein
KKF84176.1	phosphoadenosine phosphosulfate reductase		K00390	149.77	269.4	1.7e-80	phosphoadenosine phosphosulfate reductase [EC:1.8.4.8 1.8.4.10]	XF37_09140	2.83361	2.55158e-11		phosphoadenosine phosphosulfate reductase
KKF81989.1	aliphatic sulfonates transport ATP-binding subunit	ssuB	K15555	319.93	354.8	1.4e-106	sulfonate transport system ATP-binding protein [EC:7.6.2.14]	XF37_19225	2.81216	0.000492792	ssuB	aliphatic sulfonates transport ATP-binding subunit
KKF85427.1	DNA polymerase V subunit UmuD		K03503	122.77	202.9	1e-60	DNA polymerase V [EC:3.4.21.-]	XF37_01985	2.76959	6.67805e-05		DNA polymerase V subunit UmuD
KKF84570.1	trehalose phosphatase		K01087	181.07	222	4.1e-66	trehalose 6-phosphate phosphatase [EC:3.1.3.12]	XF37_06605	2.75994	2.42098e-13		trehalose phosphatase
KKF82314.1	hypothetical protein		K03476	153.57	49.6	9.3e-14	L-ascorbate 6-phosphate lactonase [EC:3.1.1.-]	XF37_18405	2.73343	1.53348e-05		hypothetical protein
KKF83914.1	ABC transporter permease		K23509	332.03	372.9	4.6e-112	galactofuranose transport system permease protein	XF37_10800	2.7269	4.3818e-05		ABC transporter permease
KKF82283.1	choline transporter		K02168	713.5	928.7	7.3e-280	choline/glycine/proline betaine transport protein	XF37_18215	2.72076	3.15226e-05		choline transporter
KKF85434.1	alanine racemase		K01775	122.63	412	8.3e-124	alanine racemase [EC:5.1.1.1]	XF37_02020	2.71837	1.32143e-09		alanine racemase
KKF83018.1	succinylglutamate-semialdehyde dehydrogenase	astD	K06447	479.33	829.9	1.8e-250	succinylglutamic semialdehyde dehydrogenase [EC:1.2.1.71]	XF37_14715	2.7148	3.84278e-11	astD	succinylglutamate-semialdehyde dehydrogenase
KKF82648.1	membrane protein		K04085	45.7	55.2	2.5e-15	tRNA 2-thiouridine synthesizing protein A [EC:2.8.1.-]	XF37_17320	2.71183	1.15016e-05		membrane protein
KKF85017.1	histidine ABC transporter substrate-binding protein HisJ		K10014	409.5	400.6	8.1e-121	histidine transport system substrate-binding protein	XF37_03985	2.70799	4.53697e-13		histidine ABC transporter substrate-binding protein HisJ
KKF84572.1	L-arabinose transporter ATP-binding protein	araG	K10539	685.03	872.2	2.1e-263	L-arabinose transport system ATP-binding protein [EC:7.5.2.12]	XF37_06615	2.70435	1.38137e-07	araG	L-arabinose transporter ATP-binding protein
KKF82647.1	membrane protein		K07112	25.83	72.5	1.4e-20	uncharacterized protein	XF37_17315	2.67717	1.032e-07		membrane protein
KKF81627.1	leucine ABC transporter substrate-binding protein		K01999	166.7	271.3	6.1e-81	branched-chain amino acid transport system substrate-binding protein	XF37_21705	2.67571	2.12641e-05		leucine ABC transporter substrate-binding protein
KKF84218.1	PTS system cellobiose/arbutin/salicin-specific transporter subunits IIBC		K02753	831.33	968.8	1.2e-292	beta-glucoside (arbutin/salicin/cellobiose) PTS system EIICB component	XF37_09375	2.64303	1.56673e-05		PTS system cellobiose/arbutin/salicin-specific transporter subunits IIBC
KKF82537.1	hypothetical protein		K09712	30.63	22.9	2e-05	uncharacterized protein	XF37_16745	2.62131	2.5684e-06		hypothetical protein
KKF82292.1	sugar ABC transporter ATP-binding protein		K10441	708.03	619	4.8e-186	ribose transport system ATP-binding protein [EC:7.5.2.7]	XF37_18285	2.61788	3.07043e-07		sugar ABC transporter ATP-binding protein
KKF80966.1	acetyl-CoA synthetase		K01895	763.93	1091.5	0	acetyl-CoA synthetase [EC:6.2.1.1]	XF37_24750	2.61546	1.06558e-13		acetyl-CoA synthetase
KKF80984.1	sugar ABC transporter		K09988	83	258.1	1.6e-77	D-lyxose ketol-isomerase [EC:5.3.1.15]	XF37_24850	2.59014	1.75326e-05		sugar ABC transporter
KKF82735.1	peroxiredoxin OsmC		K04063	55.53	132.1	7.5e-39	lipoyl-dependent peroxiredoxin [EC:1.11.1.28]	XF37_15990	2.58652	6.32088e-11		peroxiredoxin OsmC
KKF84889.1	alcohol dehydrogenase		K00148	424.03	348.4	1.2e-104	glutathione-independent formaldehyde dehydrogenase [EC:1.2.1.46]	XF37_04965	2.58307	5.15376e-10		alcohol dehydrogenase
KKF80985.1	transcriptional regulator		K10439	195.2	268.4	4.3e-80	ribose transport system substrate-binding protein	XF37_24855	2.56184	4.67276e-10		transcriptional regulator
KKF81959.1	heat shock protein HspQ		K11940	72.47	106.6	2.1e-31	heat shock protein HspQ	XF37_19050	2.54974	2.61896e-08		heat shock protein HspQ
KKF85710.1	hypothetical protein		K24118	655.1	28	2.9e-07	serine-type anaerobic sulfatase-maturating enzyme [EC:1.1.98.7]	XF37_00360	2.525	1.06594e-08		hypothetical protein
KKF80986.1	ribose ABC transporter permease		K10440	324.9	364.2	2.8e-109	ribose transport system permease protein	XF37_24860	2.52442	2.43359e-07		ribose ABC transporter permease
KKF84122.1	N-acetylglutamate synthase		K14682	235.37	703.6	1.1e-211	amino-acid N-acetyltransferase [EC:2.3.1.1]	XF37_08835	2.50611	1.56032e-11		N-acetylglutamate synthase
KKF81003.1	hypothetical protein		K04750	57.03	147.7	1.3e-43	PhnB protein	XF37_24950	2.49919	9.87608e-08		hypothetical protein
KKF82811.1	acetyltransferase		K03829	95.93	219.8	1.7e-65	putative acetyltransferase [EC:2.3.1.-]	XF37_15540	2.49446	1.29916e-05		acetyltransferase
KKF84350.1	rhodanese		K03972	88.1	32.1	2.8e-08	phage shock protein E	XF37_07790	2.48401	3.48617e-06		rhodanese
KKF84396.1	glutamate-pyruvate aminotransferase		K14261	525.63	717.2	1.6e-216	alanine-synthesizing transaminase [EC:2.6.1.-]	XF37_07250	2.48193	1.56886e-09		glutamate-pyruvate aminotransferase
KKF80964.1	acetate permease	actP	K14393	278.43	698.6	1.6e-210	cation/acetate symporter	XF37_24740	2.47334	5.97853e-10	actP	acetate permease
KKF83665.1	cystathionine beta-lyase		K01760	478.87	499.1	3.4e-150	cysteine-S-conjugate beta-lyase [EC:4.4.1.13]	XF37_12370	2.47308	2.46545e-09		cystathionine beta-lyase
KKF82699.1	aldehyde oxidoreductase		K13483	257.67	332.3	6.9e-100	xanthine dehydrogenase YagT iron-sulfur-binding subunit	XF37_16310	2.46677	5.44933e-07		aldehyde oxidoreductase
KKF84329.1	histidine kinase		K10557	341.23	512.2	1.6e-154	AI-2 transport system permease protein	XF37_07680	2.46346	7.05577e-08		histidine kinase
KKF84404.1	transporter YfdV		K13936	192.6	229.7	1.2e-68	malonate transporter and related proteins	XF37_07290	2.45586	0.00136436		transporter YfdV
KKF81048.1	membrane protein		K03098	89.97	195.8	3.2e-58	apolipoprotein D and lipocalin family protein	XF37_25200	2.43792	6.56662e-12		membrane protein
KKF82700.1	xanthine dehydrogenase		K11178	249.13	500.4	1.4e-150	xanthine dehydrogenase YagS FAD-binding subunit [EC:1.17.1.4]	XF37_16315	2.41901	1.44306e-08		xanthine dehydrogenase
KKF84900.1	carbon starvation protein A		K23676	1263.77	1144.4	0	pyruvate/proton symporter	XF37_05020	2.41665	4.84779e-10		carbon starvation protein A
KKF85124.1	spermidine/putrescine ABC transporter substrate-binding protein		K02055	216.8	291.9	4.1e-87	putative spermidine/putrescine transport system substrate-binding prote	XF37_02845	2.40501	3.63235e-10		spermidine/putrescine ABC transporter substrate-binding protein
KKF82888.1	fumarate hydratase	fumC	K01679	631.87	902.4	7e-272	fumarate hydratase, class II [EC:4.2.1.2]	XF37_14010	2.40078	7.31415e-10	fumC	fumarate hydratase
KKF81628.1	branched-chain amino acid transporter permease subunit LivH		K01997	148.2	332.8	1.1e-99	branched-chain amino acid transport system permease protein	XF37_21710	2.38628	0.000218697		branched-chain amino acid transporter permease subunit LivH
KKF80983.1	hypothetical protein		K01624	64.1	317.7	5.6e-95	fructose-bisphosphate aldolase, class II [EC:4.1.2.13]	XF37_24845	2.37653	2.26032e-06		hypothetical protein
KKF82118.1	mechanosensitive channel protein		K22044	187.17	308.8	1.7e-92	moderate conductance mechanosensitive channel	XF37_19910	2.37031	4.81983e-05		mechanosensitive channel protein
KKF82758.1	flavin reductase		K16048	217.97	35.2	2.4e-09	3-hydroxy-9,10-secoandrosta-1,3,5(10)-triene-9,17-dione monooxygenase r	XF37_16105	2.36774	5.14451e-05		flavin reductase
KKF82580.1	hypothetical protein		K09946	28.8	94.2	2.6e-27	uncharacterized protein	XF37_16970	2.35527	2.53405e-06		hypothetical protein
KKF81196.1	cation transport regulator	chaB	K06197	40.03	115	4.6e-34	cation transport regulator	XF37_24085	2.34191	2.07564e-09	chaB	cation transport regulator
KKF81566.1	universal stress protein UspB		K06144	123.73	204	1.2e-61	universal stress protein B	XF37_21385	2.34111	6.21279e-07		universal stress protein UspB
KKF85144.1	aldehyde dehydrogenase		K07248	587.33	799.7	2.3e-241	lactaldehyde dehydrogenase / glycolaldehyde dehydrogenase [EC:1.2.1.22	XF37_02960	2.3248	4.53697e-13		aldehyde dehydrogenase
KKF81530.1	L,D-transpeptidase		K19235	477.6	462.7	2.6e-139	L,D-transpeptidase YbiS	XF37_22325	2.30987	2.26018e-09		L,D-transpeptidase
KKF81967.1	SOS cell division inhibitor		K13053	79.2	197	1e-58	cell division inhibitor SulA	XF37_19095	2.30843	1.11095e-08		SOS cell division inhibitor
KKF83898.1	HxlR family transcriptional regulator		K07725	63.33	22.8	1.7e-05	CRISPR-associated protein Csa3	XF37_10710	2.29941	9.35356e-06		HxlR family transcriptional regulator
KKF82732.1	D-ala-D-ala transporter subunit		K02034	96.97	364.1	2.7e-109	peptide/nickel transport system permease protein	XF37_15975	2.28076	2.4507e-05		D-ala-D-ala transporter subunit
KKF82036.1	Clp protease ClpS	clpS	K06891	41.27	137.7	1.7e-40	ATP-dependent Clp protease adaptor protein ClpS	XF37_19480	2.27518	2.16163e-09	clpS	Clp protease ClpS
KKF82645.1	LysR family transcriptional regulator		K10972	366.1	203.4	1.2e-60	LysR family transcriptional regulator, transcriptional activator of the	XF37_17305	2.27188	2.21701e-07		LysR family transcriptional regulator
KKF80823.1	hydroxypyruvate isomerase		K01816	144.1	353.6	4.7e-106	hydroxypyruvate isomerase [EC:5.3.1.22]	XF37_25975	2.27045	0.00113427		hydroxypyruvate isomerase
KKF82875.1	serine protease		K04775	125.13	268.4	2.2e-80	protease YdgD [EC:3.4.21.-]	XF37_13945	2.27009	2.29363e-08		serine protease
KKF85530.1	exonuclease		K01143	-	471.4	1.4e-142	exodeoxyribonuclease (lambda-induced) [EC:3.1.11.3]	XF37_01410	2.26845	0.000106817		exonuclease
KKF83697.1	hexuronate transporter		K08191	411.23	528.4	4e-159	MFS transporter, ACS family, hexuronate transporter	XF37_11930	2.26666	2.21394e-05		hexuronate transporter
KKF82301.1	methylcitrate synthase		K01659	481.27	668.4	6.3e-202	2-methylcitrate synthase [EC:2.3.3.5]	XF37_18335	2.25979	6.18307e-10		methylcitrate synthase
KKF83767.1	stationary phase inducible protein CsiE		K03483	466.33	105.7	7.9e-31	mannitol operon transcriptional antiterminator	XF37_10010	2.25464	3.61854e-11		stationary phase inducible protein CsiE
KKF83157.1	oxidoreductase		K06938	25.53	95.6	1.1e-27	uncharacterized protein	XF37_14205	2.2529	3.0139e-07		oxidoreductase
KKF83321.1	KfrA protein		K23704	506.93	26.3	4.7e-07	transport and golgi organization protein 1	XF37_13120	2.25086	1.17494e-07		KfrA protein
KKF84474.1	chaperone-modulator protein CbpM		K18997	69.2	100.4	1.6e-29	chaperone modulatory protein CbpM	XF37_06815	2.24993	1.89495e-05		chaperone-modulator protein CbpM
KKF85214.1	4-aminobutyrate aminotransferase		K00823	608.8	655.9	1.3e-197	4-aminobutyrate aminotransferase [EC:2.6.1.19]	XF37_03335	2.24552	3.91112e-09		4-aminobutyrate aminotransferase
KKF82097.1	hypothetical protein		K13051	282.7	263.3	1.5e-78	L-asparaginase / beta-aspartyl-peptidase [EC:3.5.1.1 3.4.19.5]	XF37_19795	2.22509	2.44355e-06		hypothetical protein
KKF84569.1	trehalose-6-phosphate synthase		K00697	588.63	603.9	8.2e-182	trehalose 6-phosphate synthase [EC:2.4.1.15 2.4.1.347]	XF37_06600	2.22293	1.78259e-10		trehalose-6-phosphate synthase
KKF81046.1	entericidin B membrane lipoprotein		K16348	51.8	61.1	2.6e-17	entericidin B	XF37_25190	2.22238	5.216e-11		entericidin B membrane lipoprotein
KKF85351.1	membrane protein		K03543	286.77	167.4	1.7e-49	membrane fusion protein, multidrug efflux system	XF37_02040	2.21191	1.89533e-05		membrane protein
KKF83395.1	hypothetical protein		K03796	66.07	288.2	2.4e-86	Bax protein	XF37_12605	2.20778	3.75974e-12		hypothetical protein
KKF81275.1	lytic murein transglycosylase	mltD	K08307	141.13	455.1	1.7e-136	membrane-bound lytic murein transglycosylase D [EC:4.2.2.-]	XF37_23835	2.20588	1.14958e-12	mltD	lytic murein transglycosylase
KKF80862.1	DNA gyrase inhibitor		K07470	130.63	260.2	1.8e-78	DNA gyrase inhibitor	XF37_25860	2.20432	3.35258e-08		DNA gyrase inhibitor
KKF80467.1	transcriptional regulator		K22650	129.23	290.4	2.8e-87	luxR family transcriptional regulator, regulator of transport and utili	XF37_27105	2.20307	0.000381427		transcriptional regulator
KKF85615.1	transcriptional regulator HdfR		K23773	196.93	348.9	8.5e-105	LysR family transcriptional regulator, flagellar master operon regulato	XF37_01385	2.2009	0.000146541		transcriptional regulator HdfR
KKF83909.1	antitoxin ChpS		K18842	61.67	83.5	4.4e-24	antitoxin ChpS	XF37_10770	2.19574	0.000173359		antitoxin ChpS
KKF83585.1	altronate hydrolase		K01685	556.1	684.4	2.6e-206	altronate hydrolase [EC:4.2.1.7]	XF37_11940	2.19572	1.32731e-05		altronate hydrolase
KKF81100.1	sugar kinase		K00852	230.17	128.3	1.3e-37	ribokinase [EC:2.7.1.15]	XF37_24840	2.19171	5.19788e-05		sugar kinase
KKF83534.1	fimbrial protein		K07350	240.7	33	1.6e-08	minor fimbrial subunit	XF37_11675	2.18768	0.00135937		fimbrial protein
KKF80717.1	transcriptional regulator		K02099	176.07	334.7	2.7e-100	AraC family transcriptional regulator, arabinose operon regulatory prot	XF37_27665	2.17587	1.06467e-05		transcriptional regulator
KKF80550.1	metabolite transporter		K08368	379.1	591.9	2.2e-178	MFS transporter, putative metabolite transport protein	XF37_27565	2.1751	0.000425155		metabolite transporter
KKF83660.1	2,5-diketo-D-gluconic acid reductase	dkgA	K06221	337.47	435.6	2.8e-131	2,5-diketo-D-gluconate reductase A [EC:1.1.1.346]	XF37_12345	2.17271	6.97308e-11	dkgA	2,5-diketo-D-gluconic acid reductase
KKF82729.1	D-alanyl-D-alanine dipeptidase		K08641	54.27	211.7	5.3e-63	zinc D-Ala-D-Ala dipeptidase [EC:3.4.13.22]	XF37_15960	2.16929	1.21603e-06		D-alanyl-D-alanine dipeptidase
KKF83243.1	zinc transporter ZitB		K16264	308.5	443.7	2.8e-133	cobalt-zinc-cadmium efflux system protein	XF37_13455	2.1653	2.23018e-09		zinc transporter ZitB
KKF83954.1	transposase		K07491	16.93	97.9	3.1e-28	putative transposase	XF37_10670	2.15537	1.37903e-06		transposase
KKF82098.1	L-asparaginase		K13051	282.7	158.8	7.1e-47	L-asparaginase / beta-aspartyl-peptidase [EC:3.5.1.1 3.4.19.5]	XF37_19800	2.15154	2.7679e-10		L-asparaginase
KKF85075.1	IclR family transcriptional regulator		K19333	277.9	226.2	1.8e-67	IclR family transcriptional regulator, KDG regulon repressor	XF37_04285	2.14882	2.08098e-05		IclR family transcriptional regulator
KKF80578.1	leu operon leader peptide		K05806	51.23	68.8	6.4e-20	leu operon leader peptide	XF37_27725	2.14866	0.0289312		leu operon leader peptide
KKF82701.1	xanthine dehydrogenase		K11177	668.57	341.2	4.5e-102	xanthine dehydrogenase YagR molybdenum-binding subunit [EC:1.17.1.4]	XF37_16320	2.14472	3.2011e-07		xanthine dehydrogenase
KKF82730.1	peptide ABC transporter substrate-binding protein		K02035	238.7	365.4	1.8e-109	peptide/nickel transport system substrate-binding protein	XF37_15965	2.14076	8.17218e-06		peptide ABC transporter substrate-binding protein
KKF84847.1	amino acid transporter		K10001	249.2	504.5	1.2e-151	glutamate/aspartate transport system substrate-binding protein	XF37_04730	2.13741	6.35372e-12		amino acid transporter
KKF84636.1	bacterial Ig-like domain family protein		K13276	1654.77	37.4	1.6e-10	bacillopeptidase F [EC:3.4.21.-]	XF37_06085	2.13331	2.59775e-12		bacterial Ig-like domain family protein
KKF80569.1	membrane protein		K03975	62.07	110.7	2.3e-32	membrane-associated protein	XF37_27670	2.1276	2.07263e-05		membrane protein
KKF82075.1	glutaredoxin		K03674	88.8	146.7	5.7e-44	glutaredoxin 1	XF37_19680	2.11497	6.96628e-05		glutaredoxin
KKF82984.1	integration host factor subunit alpha	ihfA	K04764	115.77	175.8	1.6e-52	integration host factor subunit alpha	XF37_14540	2.11474	2.6678e-06	ihfA	integration host factor subunit alpha
KKF80901.1	cell division protein		K22302	35.4	65.5	1.1e-18	transcriptional repressor of cell division inhibition gene dicB	XF37_25705	2.11083	0.00267939		cell division protein
KKF81794.1	hypothetical protein		K06077	38.37	82.6	1.5e-23	outer membrane lipoprotein SlyB	XF37_20590	2.10889	3.21855e-08		hypothetical protein
KKF84223.1	transcriptional regulator		K12266	501.77	736.9	4.7e-222	anaerobic nitric oxide reductase transcription regulator	XF37_09405	2.09744	0.000391136		transcriptional regulator
KKF83587.1	serine/threonine protein kinase		K07862	326.03	679.3	5.3e-205	serine/threonine transporter	XF37_11950	2.07565	5.00955e-08		serine/threonine protein kinase
KKF83422.1	amino acid ABC transporter substrate-binding protein		K09969	324.1	609.3	1.2e-183	general L-amino acid transport system substrate-binding protein	XF37_11070	2.06641	9.13128e-06		amino acid ABC transporter substrate-binding protein
KKF84985.1	3-ketoacyl-CoA thiolase	fadI	K07509	536.7	457.8	1.1e-137	acetyl-CoA acyltransferase [EC:2.3.1.16]	XF37_03820	2.06257	4.02242e-08	fadI	3-ketoacyl-CoA thiolase
KKF83079.1	long-chain fatty acid--CoA ligase		K00666	552.5	515.9	6.8e-155	fatty-acyl-CoA synthase [EC:6.2.1.-]	XF37_15035	2.06116	2.32774e-10		long-chain fatty acid--CoA ligase
KKF83729.1	RNA polymerase sigma factor RpoE		K03088	65.07	167.5	1.7e-49	RNA polymerase sigma-70 factor, ECF subfamily	XF37_09810	2.05275	1.01381e-11		RNA polymerase sigma factor RpoE
KKF83003.1	hydroperoxidase	katE	K03781	74.97	777	6.9e-234	catalase [EC:1.11.1.6]	XF37_14640	2.05024	3.85561e-11	katE	hydroperoxidase
KKF81128.1	hypothetical protein		K03497	70.67	144.7	1.5e-42	ParB family transcriptional regulator, chromosome partitioning protein	XF37_24580	2.04362	3.69291e-07		hypothetical protein
KKF84940.1	xanthine dehydrogenase		K11177	668.57	636.9	1.8e-191	xanthine dehydrogenase YagR molybdenum-binding subunit [EC:1.17.1.4]	XF37_04335	2.04307	2.64942e-06		xanthine dehydrogenase
KKF84637.1	transporter		K12543	305.4	348.3	3.1e-104	outer membrane protein, adhesin transport system	XF37_06090	2.03318	2.69681e-11		transporter
KKF83759.1	membrane protein		K15977	59.73	90.9	4e-26	putative oxidoreductase	XF37_09970	2.03279	7.47449e-05		membrane protein
KKF81971.1	ribosome modulation factor		K03812	29.77	87.6	2.3e-25	ribosome modulation factor	XF37_19125	2.02875	4.8523e-09		ribosome modulation factor
KKF81614.1	zinc ABC transporter ATPase	zntA	K01534	716.5	841.8	1.8e-253	Zn2+/Cd2+-exporting ATPase [EC:7.2.2.12 7.2.2.21]	XF37_21640	2.01658	0.00017114	zntA	zinc ABC transporter ATPase
KKF81632.1	glycerol-3-phosphate ABC transporter substrate-binding protein		K05813	333.5	663.4	5.5e-200	sn-glycerol 3-phosphate transport system substrate-binding protein	XF37_21735	2.01465	1.21656e-11		glycerol-3-phosphate ABC transporter substrate-binding protein
KKF83715.1	alpha-ketoglutarate transporter		K02625	741.53	709.8	3.6e-214	MFS transporter, MHS family, dicarboxylic acid transporter PcaT	XF37_09730	2.01331	1.12165e-07		alpha-ketoglutarate transporter
KKF81944.1	stress-induced bacterial acidophilic repeat motif		K06884	17.07	60.5	9.5e-17	uncharacterized protein	XF37_20150	2.00736	3.6429e-06		stress-induced bacterial acidophilic repeat motif
KKF82302.1	2-methylcitrate dehydratase	prpD	K01720	232.4	772.1	1.6e-232	2-methylcitrate dehydratase [EC:4.2.1.79]	XF37_18340	1.98615	8.80178e-09	prpD	2-methylcitrate dehydratase
KKF84332.1	autoinducer-2 (AI-2) modifying protein LsrG		K11530	61.97	140	8.3e-42	(4S)-4-hydroxy-5-phosphonooxypentane-2,3-dione isomerase [EC:5.3.1.32]	XF37_07695	1.98038	0.000227611		autoinducer-2 (AI-2) modifying protein LsrG
KKF83270.1	exonuclease		K01143	-	469.4	5.9e-142	exodeoxyribonuclease (lambda-induced) [EC:3.1.11.3]	XF37_13600	1.9509	0.000264939		exonuclease
KKF84582.1	translation inhibitor protein RaiA		K05809	120.03	194.1	1.5e-58	ribosome-associated inhibitor A	XF37_06305	1.95058	1.14214e-09		translation inhibitor protein RaiA
KKF84412.1	glycosyl hydrolase family 32		K01193	412.03	497.7	1.9e-149	beta-fructofuranosidase [EC:3.2.1.26]	XF37_07340	1.93903	0.000186368		glycosyl hydrolase family 32
KKF80355.1	anti-RNA polymerase sigma 70 factor		K07740	94.3	189.2	1.2e-56	regulator of sigma D	XF37_28515	1.92985	1.184e-07		anti-RNA polymerase sigma 70 factor
KKF85289.1	trehalase	treF	K01194	151.63	633	4.4e-190	alpha,alpha-trehalase [EC:3.2.1.28]	XF37_02525	1.92978	1.54304e-06	treF	trehalase
KKF83882.1	cysteine synthase		K01738	413.73	475	8.8e-143	cysteine synthase [EC:2.5.1.47]	XF37_10605	1.91341	2.06491e-11		cysteine synthase
KKF81729.1	potassium transporter KefG		K11748	225.27	276.3	4.2e-83	glutathione-regulated potassium-efflux system ancillary protein KefG	XF37_22235	1.9131	0.000306968		potassium transporter KefG
KKF85551.1	carboxymethylenebutenolidase		K01061	87.83	245.7	3.5e-73	carboxymethylenebutenolidase [EC:3.1.1.45]	XF37_01035	1.90844	3.31468e-08		carboxymethylenebutenolidase
KKF85433.1	amino acid dehydrogenase		K00285	316.87	595.3	2.8e-179	D-amino-acid dehydrogenase [EC:1.4.5.1]	XF37_02015	1.90034	2.62878e-09		amino acid dehydrogenase
KKF82406.1	L-rhamnose mutarotase		K03534	48.97	129.2	4.8e-38	L-rhamnose mutarotase [EC:5.1.3.32]	XF37_17690	1.88923	0.0086218		L-rhamnose mutarotase
KKF82297.1	membrane protein		K03329	202.5	325.9	2.4e-98	amino acid exporter	XF37_18315	1.88887	8.43206e-07		membrane protein
KKF81197.1	transporter		K07232	44.37	199.3	2.9e-59	glutathione-specific gamma-glutamylcyclotransferase [EC:4.3.2.7]	XF37_24090	1.88789	3.0548e-06		transporter
KKF82138.1	membrane protein		K14205	357.3	173.1	2.1e-51	phosphatidylglycerol lysyltransferase [EC:2.3.2.3]	XF37_20015	1.88615	0.000109235		membrane protein
KKF85056.1	protein ElaB		K05594	43.73	156.7	8.2e-47	ElaB protein	XF37_04190	1.88533	6.76258e-10		protein ElaB
KKF82271.1	hypothetical protein		K18928	266.33	338	1.2e-101	L-lactate dehydrogenase complex protein LldE	XF37_18140	1.88336	0.000180322		hypothetical protein
KKF85708.1	toxic peptide TisB		K19148	56.63	63.1	3.9e-18	small toxic protein TisB	XF37_00350	1.88035	0.00102454		toxic peptide TisB
KKF83472.1	glutamate synthase		K00266	510.57	637.6	7.5e-192	glutamate synthase (NADPH) small chain [EC:1.4.1.13]	XF37_11330	1.88031	7.32734e-08		glutamate synthase
KKF85428.1	DNA polymerase V subunit UmuC		K03502	335.23	588.8	2.9e-177	DNA polymerase V	XF37_01990	1.87652	0.000467173		DNA polymerase V subunit UmuC
KKF82408.1	PTS fructose transporter subunit IIA		K11201	182.23	268.3	3.7e-81	fructose-like PTS system EIIA component [EC:2.7.1.-]	XF37_17700	1.87337	0.0485124		PTS fructose transporter subunit IIA
KKF84330.1	autoinducer 2-binding protein lsrB		K10555	437.77	625.4	5.7e-189	AI-2 transport system substrate-binding protein	XF37_07685	1.86752	5.40493e-09		autoinducer 2-binding protein lsrB
KKF80701.1	DL-methionine transporter ATP-binding subunit	metN	K02071	328.27	514.9	5.9e-155	D-methionine transport system ATP-binding protein	XF37_28345	1.86703	1.22728e-06	metN	DL-methionine transporter ATP-binding subunit
KKF83017.1	succinylarginine dihydrolase		K01484	311.53	749.7	3e-226	succinylarginine dihydrolase [EC:3.5.3.23]	XF37_14710	1.85948	1.94328e-08		succinylarginine dihydrolase
KKF83419.1	ABC transporter ATP-binding protein		K09972	447.93	486.2	1.1e-146	general L-amino acid transport system ATP-binding protein [EC:7.4.2.1]	XF37_11055	1.85773	4.19569e-05		ABC transporter ATP-binding protein
KKF84348.1	acetylserine transporter		K15268	164.4	381.9	7.4e-115	O-acetylserine/cysteine efflux transporter	XF37_07780	1.85594	0.000119631		acetylserine transporter
KKF84405.1	CoA-transferase		K18702	466.7	89.9	4.6e-26	CoA:oxalate CoA-transferase [EC:2.8.3.19]	XF37_07295	1.85558	0.0266374		CoA-transferase
KKF82120.1	hypothetical protein		K13650	103.8	130.4	9.8e-39	MqsR-controlled colanic acid and biofilm protein A	XF37_19920	1.8551	3.10236e-05		hypothetical protein
KKF82870.1	transcriptional regulator		K15545	495.5	640.2	3.8e-193	transcriptional regulator of PTS gene	XF37_13920	1.85472	6.1553e-06		transcriptional regulator
KKF83601.1	methionyl-tRNA synthetase		K15437	332.13	127	3.6e-37	aminoacyl tRNA synthase complex-interacting multifunctional protein 1	XF37_12030	1.84543	0.0337419		methionyl-tRNA synthetase
KKF82293.1	sugar ABC transporter permease		K02057	289.13	289.2	1.3e-86	simple sugar transport system permease protein	XF37_18290	1.84374	0.00100906		sugar ABC transporter permease
KKF85315.1	peptide ABC transporter substrate-binding protein		K12368	687.4	957.6	6.1e-289	dipeptide transport system substrate-binding protein	XF37_02675	1.83982	1.06111e-09		peptide ABC transporter substrate-binding protein
KKF84698.1	antitoxin DinJ		K07473	53.43	80.3	4.4e-23	DNA-damage-inducible protein J	XF37_05810	1.83742	2.47869e-09		antitoxin DinJ
KKF84246.1	glycine/betaine ABC transporter substrate-binding protein	proX	K02002	97.67	232.6	2.7e-69	glycine betaine/proline transport system substrate-binding protein	XF37_09560	1.82423	0.000155498	proX	glycine/betaine ABC transporter substrate-binding protein
KKF82459.1	periplasmic repressor CpxP	cpxP	K06006	43.67	95	2.4e-27	periplasmic protein CpxP/Spy	XF37_17620	1.82307	1.16852e-08	cpxP	periplasmic repressor CpxP
KKF81194.1	toxin Ldr, type I toxin-antitoxin system family protein		K18862	41.83	80.5	2.8e-23	small toxic polypeptide LdrA/B/C/D	XF37_24075	1.82171	0.00408129		toxin Ldr, type I toxin-antitoxin system family protein
KKF83382.1	aldehyde dehydrogenase		K00138	736.67	938.3	3e-283	aldehyde dehydrogenase [EC:1.2.1.-]	XF37_12540	1.81791	6.61776e-08		aldehyde dehydrogenase
KKF81394.1	membrane protein		K03975	62.07	122.9	4.3e-36	membrane-associated protein	XF37_23570	1.81422	8.85141e-07		membrane protein
KKF80577.1	2-isopropylmalate synthase		K01649	465.87	585.4	4.3e-176	2-isopropylmalate synthase [EC:2.3.3.13]	XF37_27720	1.8091	5.51938e-06		2-isopropylmalate synthase
KKF84413.1	aminoimidazole riboside kinase		K00847	186.97	287.8	5.5e-86	fructokinase [EC:2.7.1.4]	XF37_07345	1.80831	0.00278421		aminoimidazole riboside kinase
KKF84018.1	Z-ring-associated protein		K09888	21.93	71.3	3e-20	cell division protein ZapA	XF37_08260	1.79967	7.715e-08		Z-ring-associated protein
KKF82272.1	amino acid dehydrogenase		K18929	457.8	689.5	1.2e-207	L-lactate dehydrogenase complex protein LldF	XF37_18145	1.79508	4.78298e-06		amino acid dehydrogenase
KKF80948.1	quinone oxidoreductase		K00344	278.23	372.7	9e-112	NADPH:quinone reductase [EC:1.6.5.5]	XF37_24655	1.7942	4.32004e-08		quinone oxidoreductase
KKF83730.1	anti-RNA polymerase sigma factor SigE		K03597	59.13	178.4	9.2e-53	sigma-E factor negative regulatory protein RseA	XF37_09815	1.79359	5.42746e-10		anti-RNA polymerase sigma factor SigE
KKF83576.1	membrane protein		K15977	59.73	98.9	1.5e-28	putative oxidoreductase	XF37_11890	1.79315	0.00293897		membrane protein
KKF83487.1	calcium/sodium:proton antiporter		K07301	119.9	315.8	1.1e-94	cation:H+ antiporter	XF37_11415	1.79204	0.000264939		calcium/sodium:proton antiporter
KKF84331.1	autoinducer 2 aldolase		K08321	364.3	587.5	7.2e-177	3-hydroxy-5-phosphonooxypentane-2,4-dione thiolase [EC:2.3.1.245]	XF37_07690	1.78449	3.73145e-07		autoinducer 2 aldolase
KKF84027.1	hemolysin		K11068	169.5	301.7	1.7e-90	hemolysin III	XF37_08310	1.77915	2.17111e-09		hemolysin
KKF82936.1	cyclopropane fatty acyl phospholipid synthase		K00574	128.07	451.6	1.3e-135	cyclopropane-fatty-acyl-phospholipid synthase [EC:2.1.1.79]	XF37_14275	1.76606	4.47763e-10		cyclopropane fatty acyl phospholipid synthase
KKF85528.1	DgsA anti-repressor MtfA		K09933	87.67	284.7	4.2e-85	MtfA peptidase	XF37_01445	1.76001	2.92449e-07		DgsA anti-repressor MtfA
KKF82029.1	leucine-responsive transcriptional regulator		K03719	130.7	224.3	5.8e-67	Lrp/AsnC family transcriptional regulator, leucine-responsive regulator	XF37_19440	1.75934	3.14252e-06		leucine-responsive transcriptional regulator
KKF81143.1	xanthine permease XanP		K16345	576.47	703.3	3.7e-212	xanthine permease XanP	XF37_24360	1.75743	0.00292226		xanthine permease XanP
KKF85076.1	rhamnonate dehydratase		K12661	384.2	591.2	3.7e-178	L-rhamnonate dehydratase [EC:4.2.1.90]	XF37_04290	1.72844	0.000142124		rhamnonate dehydratase
KKF82313.1	AraC family transcriptional regulator		K13633	264.37	362.6	6e-109	AraC family transcriptional regulator, transcriptional activator FtrA	XF37_18400	1.72287	0.00353304		AraC family transcriptional regulator
KKF81565.1	universal stress global response regulator UspA		K06149	120.8	217.3	5e-65	universal stress protein A	XF37_21380	1.72007	4.54742e-08		universal stress global response regulator UspA
KKF82303.1	propionyl-CoA synthetase	prpE	K01908	797.27	922	1.3e-277	propionyl-CoA synthetase [EC:6.2.1.17]	XF37_18345	1.71968	3.84651e-09	prpE	propionyl-CoA synthetase
KKF83575.1	glutathionyl-hydroquinone reductase YqjG		K07393	69.73	543.3	2.1e-163	glutathionyl-hydroquinone reductase [EC:1.8.5.7]	XF37_11885	1.71615	2.41052e-08		glutathionyl-hydroquinone reductase YqjG
KKF82464.1	nitrogen regulation protein NR(I)	glnG	K07712	591.53	786.6	3.4e-237	two-component system, NtrC family, nitrogen regulation response regulat	XF37_17900	1.70862	5.13713e-06	glnG	nitrogen regulation protein NR(I)
KKF83420.1	amino acid ABC transporter permease		K09971	300.5	541.8	6.5e-163	general L-amino acid transport system permease protein	XF37_11060	1.70054	0.00195671		amino acid ABC transporter permease
KKF85123.1	polyamine ABC transporter ATP-binding protein		K02052	496.07	492.9	4.7e-148	putative spermidine/putrescine transport system ATP-binding protein	XF37_02840	1.68597	1.02407e-05		polyamine ABC transporter ATP-binding protein
KKF83754.1	hypothetical protein		K23424	174.57	59.4	8.1e-17	protein O-mannosyl-transferase [EC:2.4.1.-]	XF37_09940	1.68293	0.00441007		hypothetical protein
KKF84635.1	type 1 secretion target domain-containng protein		K05970	125.27	23.2	6.3e-06	sialate O-acetylesterase [EC:3.1.1.53]	XF37_06080	1.67333	1.34974e-05		type 1 secretion target domain-containng protein
KKF84383.1	manganese transport protein MntH		K03322	499.3	575.6	4.6e-173	manganese transport protein	XF37_07185	1.67224	0.000124369		manganese transport protein MntH
KKF84263.1	transcriptional regulator		K15735	161.97	282.1	1e-84	GntR family transcriptional regulator, carbon starvation induced regula	XF37_09645	1.66898	0.000891331		transcriptional regulator
KKF82035.1	Clp protease ClpX	clpA	K03694	949.6	1277.9	0	ATP-dependent Clp protease ATP-binding subunit ClpA	XF37_19475	1.66681	9.95409e-10	clpA	Clp protease ClpX
KKF83982.1	D-galactose transporter GalP		K08137	498.93	721	1.6e-217	MFS transporter, SP family, galactose:H+ symporter	XF37_08070	1.66571	0.000135836		D-galactose transporter GalP
KKF85019.1	amino acid ABC transporter permease		K10016	328.47	387.4	5.5e-117	histidine transport system permease protein	XF37_03995	1.66065	1.3174e-05		amino acid ABC transporter permease
KKF80519.1	protein hokC		K18919	80.2	107.1	6.8e-32	protein HokC/D	XF37_27395	1.65631	0.00013077		protein hokC
KKF82833.1	mannosyl-3-phosphoglycerate phosphatase		K07026	122.27	375	6.8e-113	mannosyl-3-phosphoglycerate phosphatase [EC:3.1.3.70]	XF37_15655	1.65164	9.25422e-06		mannosyl-3-phosphoglycerate phosphatase
KKF82740.1	XRE family transcriptional regulator		K21498	77.77	88	2.7e-25	antitoxin HigA-1	XF37_16015	1.64857	0.00502385		XRE family transcriptional regulator
KKF81718.1	cell filamentation protein Fic		K04095	57.13	220.3	1.8e-65	cell filamentation protein	XF37_22180	1.64258	5.79909e-06		cell filamentation protein Fic
KKF84908.1	iron-enterobactin transporter membrane protein		K23186	461.7	531.4	2.2e-160	ferric enterobactin transport system permease protein	XF37_05060	1.63984	0.0077736		iron-enterobactin transporter membrane protein
KKF84314.1	transcriptional regulator YdeO		K21906	205.6	153.2	3.3e-45	AraC family transcriptional regulator, glutamate-dependent acid resista	XF37_07595	1.63275	0.00529007		transcriptional regulator YdeO
KKF84326.1	transcriptional regulator LsrR		K11531	306.53	461.3	4.5e-139	lsr operon transcriptional repressor	XF37_07665	1.63259	1.35312e-07		transcriptional regulator LsrR
KKF81609.1	permease		K11744	240.73	356.7	6.9e-107	AI-2 transport protein TqsA	XF37_21615	1.63097	0.000140284		permease
KKF84327.1	sugar ABC transporter		K10558	581.27	807.5	1.1e-243	AI-2 transport system ATP-binding protein	XF37_07670	1.62042	1.40185e-07		sugar ABC transporter
KKF83015.1	periplasmic protein		K06006	43.67	108	2.7e-31	periplasmic protein CpxP/Spy	XF37_14700	1.6173	6.6254e-08		periplasmic protein
KKF80953.1	acid phosphatase	aphA	K03788	148.2	423.8	4e-128	acid phosphatase (class B) [EC:3.1.3.2]	XF37_24680	1.61678	2.37428e-06	aphA	acid phosphatase
KKF85018.1	histidine ABC transporter substrate-binding protein HisJ		K10014	409.5	428.7	2.2e-129	histidine transport system substrate-binding protein	XF37_03990	1.61538	4.50282e-08		histidine ABC transporter substrate-binding protein HisJ
KKF85167.1	universal stress protein F		K14061	139.5	185.8	1.6e-55	universal stress protein F	XF37_03080	1.60412	5.8753e-08		universal stress protein F
KKF83176.1	plasmid stabilization protein ParE		K19092	33.67	73.6	6.1e-21	toxin ParE1/3/4	XF37_13795	1.60117	0.00028816		plasmid stabilization protein ParE
KKF84307.1	glutamate decarboxylase		K01580	409.17	420.9	2.4e-126	glutamate decarboxylase [EC:4.1.1.15]	XF37_07560	1.59831	1.47459e-08		glutamate decarboxylase
KKF85470.1	hypothetical protein		K04096	30.73	361.7	1.9e-108	DNA processing protein	XF37_01590	1.59441	1.37418e-08		hypothetical protein
KKF82460.1	transcriptional regulator		K02854	272.93	452.6	1.6e-136	AraC family transcriptional regulator, L-rhamnose operon transcriptiona	XF37_17660	1.59436	0.00493498		transcriptional regulator
KKF84328.1	ABC transporter permease		K10556	347	529.6	7.1e-160	AI-2 transport system permease protein	XF37_07675	1.59146	0.00733769		ABC transporter permease
KKF85469.1	hypothetical protein		K03747	88.9	196.6	7.6e-59	Smg protein	XF37_01585	1.59092	6.66429e-10		hypothetical protein
KKF83000.1	L-cystine transporter tcyP		K06956	355.17	651	2.3e-196	uncharacterized protein	XF37_14625	1.58912	2.15838e-05		L-cystine transporter tcyP
KKF85120.1	gamma-aminobutyraldehyde dehydrogenase		K00137	676.8	833.5	1.1e-251	aminobutyraldehyde dehydrogenase [EC:1.2.1.19]	XF37_02825	1.58253	0.00194358		gamma-aminobutyraldehyde dehydrogenase
KKF82734.1	peptide ABC transporter ATP-binding protein		K02032	379.77	401.7	2e-120	peptide/nickel transport system ATP-binding protein	XF37_15985	1.57792	0.010462		peptide ABC transporter ATP-binding protein
KKF83861.1	transcriptional regulator EutR		K04033	143.77	373.7	4e-112	AraC family transcriptional regulator, ethanolamine operon transcriptio	XF37_10495	1.57208	0.00622181		transcriptional regulator EutR
KKF84252.1	glutaredoxin		K06191	76.87	110	2.5e-32	glutaredoxin-like protein NrdH	XF37_09590	1.57009	0.00301486		glutaredoxin
KKF82517.1	transcriptional repressor RcnR to maintain nickel and cobalt homeostasis		K23240	112.43	137.1	6.6e-41	FrmR/RcnR family transcriptional regulator, repressor of rcnA expressio	XF37_16645	1.56427	0.00170806		transcriptional repressor RcnR to maintain nickel and cobalt homeostasis
KKF84848.1	amino acid ABC transporter permease		K10003	263.73	385.9	1.9e-116	glutamate/aspartate transport system permease protein	XF37_04735	1.56334	0.00135172		amino acid ABC transporter permease
KKF81309.1	6-O-methylguanine DNA methyltransferase		K10778	206.2	381.5	2.2e-114	AraC family transcriptional regulator, regulatory protein of adaptative	XF37_23135	1.55859	4.00755e-06		6-O-methylguanine DNA methyltransferase
KKF81038.1	phage T7 F exclusion suppressor FxsA	fxsA	K07113	68.4	193.1	1.7e-57	UPF0716 protein FxsA	XF37_25145	1.55537	9.35356e-06	fxsA	phage T7 F exclusion suppressor FxsA
KKF82956.1	iron-sulfur cluster assembly scaffold protein	sufA	K05997	146.93	188.5	9e-57	Fe-S cluster assembly protein SufA	XF37_14390	1.55439	0.000266018	sufA	iron-sulfur cluster assembly scaffold protein
KKF83833.1	hydrolase		K06999	103.37	132.8	4.8e-39	phospholipase/carboxylesterase	XF37_10350	1.55321	9.36266e-05		hydrolase
KKF83908.1	gamma-glutamylcyclotransferase		K19761	46.37	55.3	1.5e-15	gamma-glutamylaminecyclotransferase [EC:2.3.2.-]	XF37_10765	1.5522	2.16341e-05		gamma-glutamylcyclotransferase
KKF85121.1	spermidine/putrescine ABC transporter permease		K11070	277.53	251.9	4.3e-75	spermidine/putrescine transport system permease protein	XF37_02830	1.54376	5.79311e-05		spermidine/putrescine ABC transporter permease
KKF84264.1	gamma-aminobutyrate transporter		K11735	594.33	697.4	3.1e-210	GABA permease	XF37_09650	1.54242	0.00757784		gamma-aminobutyrate transporter
KKF81857.1	RNase III inhibitor		K23518	165.23	264.7	5.5e-79	O-acetyl-ADP-ribose deacetylase [EC:3.1.1.106]	XF37_20920	1.54059	3.80704e-07		RNase III inhibitor
KKF81574.1	membrane protein		K01993	242.53	353.1	6.4e-106	HlyD family secretion protein	XF37_21430	1.53813	0.00250004		membrane protein
KKF81460.1	transposase		K07484	14.6	38.3	3.4e-10	transposase	XF37_22750	1.53439	1.96021e-07		transposase
KKF84986.1	multifunctional fatty acid oxidation complex subunit alpha	fadJ	K01782	821.07	1004.2	2.4e-302	3-hydroxyacyl-CoA dehydrogenase / enoyl-CoA hydratase / 3-hydroxybutyry	XF37_03825	1.53368	2.09838e-06	fadJ	multifunctional fatty acid oxidation complex subunit alpha
KKF85704.1	acetolactate synthase catalytic subunit		K01652	457.7	751.2	3.5e-226	acetolactate synthase I/II/III large subunit [EC:2.2.1.6]	XF37_00330	1.53314	3.8481e-06		acetolactate synthase catalytic subunit
KKF83625.1	glycogen synthesis protein GlgS		K22720	56.93	118	3.5e-35	surface composition regulator	XF37_12170	1.53263	0.000295502		glycogen synthesis protein GlgS
KKF82516.1	nickel/cobalt efflux protein RcnA		K08970	45	294.4	3.2e-88	nickel/cobalt transporter (NicO) family protein	XF37_16640	1.53235	0.000650033		nickel/cobalt efflux protein RcnA
KKF82923.1	transcriptional repressor NemR		K16137	113	160.1	4e-47	TetR/AcrR family transcriptional regulator, transcriptional repressor f	XF37_14210	1.5319	0.00301486		transcriptional repressor NemR
KKF84100.1	diaminopimelate decarboxylase		K01586	267.93	403	7.1e-121	diaminopimelate decarboxylase [EC:4.1.1.20]	XF37_08725	1.53057	1.03428e-05		diaminopimelate decarboxylase
KKF84705.1	carbon-nitrogen hydrolase		K13566	282.7	212.8	3e-63	omega-amidase [EC:3.5.1.3]	XF37_05845	1.52855	0.00459825		carbon-nitrogen hydrolase
KKF83844.1	transaldolase		K00616	149.13	406.4	5.6e-122	transaldolase [EC:2.2.1.2]	XF37_10405	1.52564	9.87025e-09		transaldolase
KKF82060.1	arginine ABC transporter substrate-binding protein		K09996	365.1	397.9	4.2e-120	arginine transport system substrate-binding protein	XF37_19605	1.52141	5.14363e-08		arginine ABC transporter substrate-binding protein
KKF82876.1	multidrug transporter		K11742	94.13	163.2	7e-49	spermidine export protein MdtI	XF37_13950	1.51852	0.00603459		multidrug transporter
KKF84262.1	peptidoglycan-binding protein		K12943	306.4	38.4	2.5e-10	lipoprotein YgeR	XF37_09640	1.51398	0.000214989		peptidoglycan-binding protein
KKF82282.1	transcriptional regulator BetI		K02167	117.37	266.4	8.1e-80	TetR/AcrR family transcriptional regulator, transcriptional repressor o	XF37_18210	1.50961	0.0084471		transcriptional regulator BetI
KKF81843.1	hypothetical protein		K12149	45.1	120.7	1e-35	DNA-damage-inducible protein I	XF37_20835	1.50906	0.000107112		hypothetical protein
KKF84288.1	6-phospho-beta-glucosidase		K01223	490.37	860.9	1.8e-259	6-phospho-beta-glucosidase [EC:3.2.1.86]	XF37_09370	1.50427	0.000114385		6-phospho-beta-glucosidase
KKF83417.1	hypothetical protein		K12686	210.27	75.6	1e-21	outer membrane lipase/esterase	XF37_12715	1.50387	1.23521e-05		hypothetical protein
KKF81399.1	osmoprotectant uptake system substrate-binding protein		K05845	72.77	324.8	2.6e-97	osmoprotectant transport system substrate-binding protein	XF37_23595	1.5027	0.000171834		osmoprotectant uptake system substrate-binding protein
KKF82996.1	hypothetical protein		K15523	129.6	193.2	2.9e-57	protein-ribulosamine 3-kinase [EC:2.7.1.172]	XF37_14605	1.50017	4.14175e-08		hypothetical protein
KKF84941.1	hypothetical protein		K07402	94.93	195.3	6.7e-58	xanthine dehydrogenase accessory factor	XF37_04340	1.49863	0.00623496		hypothetical protein
KKF82300.1	2-methylisocitrate lyase	prpB	K03417	356.27	461	5.3e-139	methylisocitrate lyase [EC:4.1.3.30]	XF37_18330	1.49863	2.9503e-07	prpB	2-methylisocitrate lyase
KKF82113.1	DNA starvation/stationary phase protection protein Dps		K04047	69.73	154.6	1.2e-45	starvation-inducible DNA-binding protein	XF37_19880	1.49484	9.96911e-09		DNA starvation/stationary phase protection protein Dps
KKF85122.1	spermidine/putrescine ABC transporter permease		K02054	291.5	233.7	1.1e-69	putative spermidine/putrescine transport system permease protein	XF37_02835	1.49365	0.000146973		spermidine/putrescine ABC transporter permease
KKF85293.1	hypothetical protein		K07290	258.93	789.4	1.1e-237	AsmA family protein	XF37_02550	1.49316	5.53604e-05		hypothetical protein
KKF81123.1	ribosomal RNA adenine dimethylase family protein		K00561	208.57	52	1.9e-14	23S rRNA (adenine-N6)-dimethyltransferase [EC:2.1.1.184]	XF37_24555	1.49316	0.00398535		ribosomal RNA adenine dimethylase family protein
KKF82995.1	hypothetical protein		K18840	92.13	25.4	3.7e-06	antitoxin GhoS	XF37_14600	1.48926	4.88443e-07		hypothetical protein
KKF81950.1	enterobacterial Ail/Lom family protein		K07804	170.23	197	7.3e-59	putatice virulence related protein PagC	XF37_20180	1.48761	0.00386014		enterobacterial Ail/Lom family protein
KKF85508.1	peptidase A24		K02506	148.07	208.6	1.8e-62	leader peptidase HopD [EC:3.4.23.43]	XF37_01780	1.47845	0.0169146		peptidase A24
KKF83016.1	succinylglutamate desuccinylase		K05526	104.77	452.7	2.4e-136	succinylglutamate desuccinylase [EC:3.5.1.96]	XF37_14705	1.47439	4.02779e-05		succinylglutamate desuccinylase
KKF84177.1	membrane protein		K18922	75.03	93.1	2.7e-27	protein HokE	XF37_09145	1.47241	0.0323024		membrane protein
KKF80433.1	phosphotransferase		K07559	145.47	82.9	8.9e-24	putative RNA 2'-phosphotransferase [EC:2.7.1.-]	XF37_26915	1.4721	0.014809		phosphotransferase
KKF84475.1	DNA-binding protein		K05516	347.17	372.4	6.9e-112	curved DNA-binding protein	XF37_06820	1.47156	2.55348e-08		DNA-binding protein
KKF82251.1	diguanylate cyclase	adrA	K18968	245.4	468.6	9e-141	diguanylate cyclase [EC:2.7.7.65]	XF37_18995	1.47147	0.00604161	adrA	diguanylate cyclase
KKF82934.1	transcriptional regulator		K10972	366.1	252.1	1.8e-75	LysR family transcriptional regulator, transcriptional activator of the	XF37_14265	1.46478	0.000483593		transcriptional regulator
KKF80824.1	tartronate semialdehyde reductase		K00042	393.3	422.6	3.3e-127	2-hydroxy-3-oxopropionate reductase [EC:1.1.1.60]	XF37_25980	1.45935	0.0154951		tartronate semialdehyde reductase
KKF85094.1	endopeptidase		K14744	30.3	198.3	4.8e-59	prophage endopeptidase [EC:3.4.-.-]	XF37_03720	1.45591	0.0223617		endopeptidase
KKF82726.1	antiporter		K20265	209.3	560.4	1.3e-168	glutamate:GABA antiporter	XF37_15940	1.4533	1.12165e-07		antiporter
KKF80574.1	isopropylmalate isomerase	leuD	K01704	141.03	286.1	7.9e-86	3-isopropylmalate/(R)-2-methylmalate dehydratase small subunit [EC:4.2.	XF37_27705	1.45003	0.0149173	leuD	isopropylmalate isomerase
KKF83162.1	LysR family transcriptional regulator		K16135	325.77	448	4.5e-135	LysR family transcriptional regulator, transcriptional activator for dm	XF37_15005	1.44982	0.000561983		LysR family transcriptional regulator
KKF83672.1	dienelactone hydrolase		K01061	87.83	259.1	2.9e-77	carboxymethylenebutenolidase [EC:3.1.1.45]	XF37_12405	1.44966	0.000204064		dienelactone hydrolase
KKF85346.1	Shiga toxin subunit B		K11007	117.83	167.9	1.3e-50	shiga toxin subunit B	XF37_02390	1.44614	5.53772e-06		Shiga toxin subunit B
KKF82066.1	spermidine/putrescine ABC transporter permease		K11074	325.03	466.8	6e-141	putrescine transport system permease protein	XF37_19635	1.44366	0.002085		spermidine/putrescine ABC transporter permease
KKF80494.1	Trp operon repressor		K03720	72.37	180.9	2.7e-54	TrpR family transcriptional regulator, trp operon repressor	XF37_27260	1.44354	0.0004973		Trp operon repressor
KKF84351.1	transcriptional regulator	ftrA	K13633	264.37	468.3	4.2e-141	AraC family transcriptional regulator, transcriptional activator FtrA	XF37_07795	1.44252	3.15957e-05	ftrA	transcriptional regulator
KKF82137.1	cardiolipin synthase 2		K06131	253.57	379.5	9.3e-114	cardiolipin synthase A/B [EC:2.7.8.-]	XF37_20010	1.43678	2.36044e-06		cardiolipin synthase 2
KKF84919.1	gamma-glutamyl ligase		K06048	117	377.5	2.9e-113	glutamate---cysteine ligase / carboxylate-amine ligase [EC:6.3.2.2 6.3.	XF37_05125	1.43594	8.17218e-06		gamma-glutamyl ligase
KKF83764.1	3-phenylpropionate dioxygenase		K05708	592.77	754.1	1.4e-227	3-phenylpropionate/trans-cinnamate dioxygenase subunit alpha [EC:1.14.1	XF37_09995	1.43219	0.0273343		3-phenylpropionate dioxygenase
KKF81238.1	endopeptidase		K14744	30.3	100.4	4.5e-29	prophage endopeptidase [EC:3.4.-.-]	XF37_23890	1.42477	0.0269109		endopeptidase
KKF85264.1	hypothetical protein		K06884	17.07	58.2	4.6e-16	uncharacterized protein	XF37_03600	1.42197	0.000226049		hypothetical protein
KKF82244.1	hypothetical protein		K09913	67.83	130.5	7.2e-39	purine/pyrimidine-nucleoside phosphorylase [EC:2.4.2.1 2.4.2.2]	XF37_18960	1.42026	8.59735e-05		hypothetical protein
KKF80575.1	isopropylmalate isomerase		K01702	1096.07	800.9	3.3e-241	3-isopropylmalate dehydratase [EC:4.2.1.33]	XF37_27710	1.41681	1.15163e-05		isopropylmalate isomerase
KKF82733.1	peptide ABC transporter substrate-binding protein		K02031	427.07	488.3	1.7e-146	peptide/nickel transport system ATP-binding protein	XF37_15980	1.41489	0.00830627		peptide ABC transporter substrate-binding protein
KKF81364.1	transcriptional regulator		K21900	279.47	289.6	1.2e-86	LysR family transcriptional regulator, transcriptional activator of the	XF37_23420	1.41252	0.000846309		transcriptional regulator
KKF85611.1	acetolactate synthase catalytic subunit		K01652	457.7	764.5	3.2e-230	acetolactate synthase I/II/III large subunit [EC:2.2.1.6]	XF37_01365	1.40902	6.04051e-06		acetolactate synthase catalytic subunit
KKF84430.1	antirepressor		K07741	32.97	170.6	2.5e-50	anti-repressor protein	XF37_07445	1.40747	0.00013225		antirepressor
KKF83843.1	transketolase		K00615	236.4	855.1	2.1e-257	transketolase [EC:2.2.1.1]	XF37_10400	1.40704	1.3373e-08		transketolase
KKF84775.1	aspartate kinase		K00928	393.97	410.2	4e-123	aspartate kinase [EC:2.7.2.4]	XF37_05470	1.40524	0.000976673		aspartate kinase
KKF84632.1	transcriptional regulator		K19591	151.4	171.4	1.3e-50	MerR family transcriptional regulator, copper efflux regulator	XF37_06065	1.40476	0.00819227		transcriptional regulator
KKF85477.1	zinc-responsive transcriptional regulator	zntR	K13638	150.9	210.3	5.7e-63	MerR family transcriptional regulator, Zn(II)-responsive regulator of z	XF37_01625	1.40417	0.00540163	zntR	zinc-responsive transcriptional regulator
KKF82323.1	S-formylglutathione hydrolase		K01070	144.9	470.9	2.3e-141	S-formylglutathione hydrolase [EC:3.1.2.12]	XF37_18455	1.39906	0.000973047		S-formylglutathione hydrolase
KKF81644.1	quercetin 2,3-dioxygenase		K06911	33	192.2	6.1e-57	quercetin 2,3-dioxygenase [EC:1.13.11.24]	XF37_21795	1.3977	2.83143e-05		quercetin 2,3-dioxygenase
KKF83894.1	amino acid permease		K11737	653.1	815.3	4.9e-246	D-serine/D-alanine/glycine transporter	XF37_10690	1.39597	4.98655e-07		amino acid permease
KKF80576.1	3-isopropylmalate dehydrogenase		K00052	402.6	556	1.6e-167	3-isopropylmalate dehydrogenase [EC:1.1.1.85]	XF37_27715	1.39528	0.00230242		3-isopropylmalate dehydrogenase
KKF83813.1	formate transporter		K03459	509.23	639.7	1.5e-193	formate transporter	XF37_10250	1.39103	0.0069567		formate transporter
KKF83527.1	hypothetical protein		K17290	107	158.1	1.1e-46	oxidoreductase [EC:1.1.1.-]	XF37_11640	1.38708	0.00370418		hypothetical protein
KKF85800.1	D-ribose pyranase		K06726	117.73	198.6	1.3e-59	D-ribose pyranase [EC:5.4.99.62]	XF37_00750	1.38591	1.77155e-07		D-ribose pyranase
KKF81412.1	transposase		K07483	42.1	74.8	2.5e-21	transposase	XF37_22975	1.38111	1.66211e-07		transposase
KKF83345.1	hypothetical protein		K12682	993.87	49.4	1.1e-13	tracheal colonization factor	XF37_12880	1.37735	0.00299874		hypothetical protein
KKF82222.1	hypothetical protein		K06078	33.83	23.3	1.9e-05	murein lipoprotein	XF37_18835	1.37735	0.00469044		hypothetical protein
KKF81804.1	DNAse		K03424	86.5	306.8	1.1e-91	TatD DNase family protein [EC:3.1.21.-]	XF37_20640	1.3764	1.82063e-06		DNAse
KKF83080.1	membrane protein		K07285	50.2	232.3	1e-69	outer membrane lipoprotein	XF37_15040	1.3756	1.66211e-07		membrane protein
KKF81927.1	aspartate kinase	metL	K12525	764.13	1337.5	0	bifunctional aspartokinase / homoserine dehydrogenase 2 [EC:2.7.2.4 1.1	XF37_20360	1.37523	2.95605e-06	metL	aspartate kinase
KKF82331.1	transcriptional regulator		K20264	245.7	293.2	3.2e-88	two-component system, NarL family, response regulator FusR	XF37_18495	1.37246	0.00180219		transcriptional regulator
KKF82470.1	capsid assembly protein		K21511	239.6	503.7	2e-151	capsid assembly protease [EC:3.4.21.-]	XF37_17460	1.36757	0.0180934		capsid assembly protein
KKF82171.1	transcriptional regulator		K23777	121.8	175.1	1.2e-51	TetR/AcrR family transcriptional regulator, regulator of cefoperazone a	XF37_19975	1.36697	0.00340782		transcriptional regulator
KKF82351.1	transcriptional regulator		K05818	178.3	388	5.4e-117	IclR family transcriptional regulator, mhp operon transcriptional activ	XF37_18410	1.36473	0.000248855		transcriptional regulator
KKF81726.1	hypothetical protein		K09898	46.5	126.9	5.7e-38	uncharacterized protein	XF37_22220	1.36109	0.000568908		hypothetical protein
KKF82731.1	peptide ABC transporter permease		K12369	481.73	422.1	4.5e-127	dipeptide transport system permease protein	XF37_15970	1.36043	0.0443919		peptide ABC transporter permease
KKF83724.1	amino acid transporter		K11249	107.97	239.5	6.5e-72	cysteine/O-acetylserine efflux protein	XF37_09780	1.35797	0.00593762		amino acid transporter
KKF81278.1	LysR family transcriptional regulator		K18900	323.23	295.9	1.2e-88	LysR family transcriptional regulator, regulator for bpeEF and oprC	XF37_23850	1.35511	0.00914205		LysR family transcriptional regulator
KKF82189.1	thioesterase		K12500	117.3	205.5	7.3e-62	thioesterase III [EC:3.1.2.-]	XF37_18670	1.34574	0.0016613		thioesterase
KKF82799.1	cystine transporter subunit		K02424	271.57	337.3	4e-101	L-cystine transport system substrate-binding protein	XF37_15480	1.34183	6.6772e-06		cystine transporter subunit
KKF80820.1	ureidoglycolate hydrolase		K01483	44.3	209.6	1.7e-62	ureidoglycolate lyase [EC:4.3.2.3]	XF37_25960	1.34016	0.000362025		ureidoglycolate hydrolase
KKF81670.1	transcriptional regulator MalT		K03556	124.1	623.4	3e-187	LuxR family transcriptional regulator, maltose regulon positive regulat	XF37_21930	1.34015	2.78666e-08		transcriptional regulator MalT
KKF82596.1	XRE family transcriptional regulator		K15773	57.03	36.2	1.3e-09	HTH-type transcriptional regulator / antitoxin HipB	XF37_17055	1.33971	0.0039619		XRE family transcriptional regulator
KKF84697.1	flagellar biosynthesis protein FlhA		K02400	720.93	732.5	1.4e-220	flagellar biosynthesis protein FlhA	XF37_05795	1.3337	0.0416835		flagellar biosynthesis protein FlhA
KKF81131.1	small toxic polypeptide		K18921	76.9	106	2.4e-31	protein HokB	XF37_24600	1.32364	5.58837e-05		small toxic polypeptide
KKF82941.1	hypothetical protein		K00480	305.6	20.8	4.1e-05	salicylate hydroxylase [EC:1.14.13.1]	XF37_14310	1.32349	0.00097297		hypothetical protein
KKF81142.1	hypothetical protein		K07289	286	65	2.1e-18	AsmA protein	XF37_24355	1.32186	8.25688e-08		hypothetical protein
KKF84638.1	amino acid permease		K03294	449.93	223.4	1.7e-66	basic amino acid/polyamine antiporter, APA family	XF37_06095	1.31743	2.05428e-06		amino acid permease
KKF84857.1	hypothetical protein		K07743	64.83	22.1	3.7e-05	transcriptional regulator	XF37_04790	1.31651	8.07424e-06		hypothetical protein
KKF82273.1	hypothetical protein		K00782	129.63	181.4	8.2e-54	L-lactate dehydrogenase complex protein LldG	XF37_18150	1.31609	0.000851726		hypothetical protein
KKF83193.1	transposase		K07497	13.5	151.8	1.3e-44	putative transposase	XF37_13690	1.31383	1.40003e-07		transposase
KKF83452.1	hypothetical protein		K03623	42.73	117.4	6.9e-35	ribonuclease inhibitor	XF37_11230	1.31246	0.0254614		hypothetical protein
KKF85033.1	hypothetical protein		K09899	102.67	217.7	2.1e-65	uncharacterized protein	XF37_04065	1.30526	0.00472976		hypothetical protein
KKF83671.1	L-glyceraldehyde 3-phosphate reductase		K19265	342.4	610.8	4.9e-184	L-glyceraldehyde 3-phosphate reductase [EC:1.1.1.-]	XF37_12400	1.3036	8.97562e-05		L-glyceraldehyde 3-phosphate reductase
KKF81790.1	membrane protein		K13663	170.37	86.8	5.2e-25	acyltransferase [EC:2.3.1.-]	XF37_20565	1.30132	0.0288987		membrane protein
KKF83410.1	transcriptional regulator		K07726	43.97	53.8	5.5e-15	putative transcriptional regulator	XF37_12680	1.29904	4.81983e-05		transcriptional regulator
KKF82136.1	hypothetical protein		K18353	117.13	83.5	5.2e-24	vancomycin resistance protein VanJ	XF37_20005	1.29898	0.000387346		hypothetical protein
KKF81126.1	single-stranded DNA-binding protein		K03111	33.9	197.4	1.2e-58	single-strand DNA-binding protein	XF37_24570	1.29849	0.0269404		single-stranded DNA-binding protein
KKF83860.1	carboxysome structural protein EutK		K04025	168.03	279.4	2.9e-84	ethanolamine utilization protein EutK	XF37_10490	1.29735	0.00729472		carboxysome structural protein EutK
KKF82140.1	membrane protein		K06890	151.63	291.1	2.5e-87	uncharacterized protein	XF37_20025	1.29661	0.00390535		membrane protein
KKF84235.1	carbon storage regulator		K03563	26.8	113	3.9e-33	carbon storage regulator	XF37_09475	1.2957	0.00366168		carbon storage regulator
KKF82294.1	sugar ABC transporter permease		K02057	289.13	296	1.1e-88	simple sugar transport system permease protein	XF37_18295	1.29556	0.000216139		sugar ABC transporter permease
KKF85324.1	small toxic polypeptide ldrD		K18862	41.83	112.6	2.7e-33	small toxic polypeptide LdrA/B/C/D	XF37_02635	1.29303	0.0209468		small toxic polypeptide ldrD
KKF80648.1	transcriptional regulator		K06206	83.27	319.3	5.4e-96	sugar fermentation stimulation protein A	XF37_28080	1.29177	4.32803e-07		transcriptional regulator
KKF81947.1	Mn-containing catalase		K07217	211.07	375.5	6.2e-113	Mn-containing catalase	XF37_20165	1.28748	0.00545961		Mn-containing catalase
KKF84189.1	hypothetical protein		K07680	212.67	19.6	7e-05	two-component system, NarL family, sensor histidine kinase ComP [EC:2.7	XF37_09210	1.28122	0.000317218		hypothetical protein
KKF82227.1	antitoxin		K07746	33.13	75.9	1.7e-21	antitoxin ParD1/3/4	XF37_18860	1.28098	0.000142797		antitoxin
KKF83649.1	transcriptional regulator		K07666	295.33	348.3	2e-104	two-component system, OmpR family, response regulator QseB	XF37_12290	1.2805	0.0016947		transcriptional regulator
KKF82078.1	DeoR faimly transcriptional regulator		K23778	106.97	252.2	2.5e-75	TetR/AcrR family transcriptional regulator, regulator of biofilm format	XF37_19695	1.27969	0.00177201		DeoR faimly transcriptional regulator
KKF82536.1	lipid kinase		K07029	137.3	200.7	1.3e-59	diacylglycerol kinase (ATP) [EC:2.7.1.107]	XF37_16740	1.27864	0.000165528		lipid kinase
KKF80635.1	hypothetical protein		K24088	491.97	643	2.2e-194	recombination-promoting nuclease RpnC [EC:3.1.21.-]	XF37_28010	1.27811	0.00545961		hypothetical protein
KKF82047.1	pyruvate dehydrogenase		K00156	712.93	905.9	8.2e-273	pyruvate dehydrogenase (quinone) [EC:1.2.5.1]	XF37_19535	1.27543	3.83802e-06		pyruvate dehydrogenase
KKF80992.1	ribose-phosphate pyrophosphokinase		K05774	105.33	256.4	1.2e-76	ribose 1,5-bisphosphokinase [EC:2.7.4.23]	XF37_24890	1.27078	0.00540243		ribose-phosphate pyrophosphokinase
KKF85133.1	acetyltransferase		K04042	331.73	28.5	1.5e-07	bifunctional UDP-N-acetylglucosamine pyrophosphorylase / glucosamine-1-	XF37_02900	1.26938	0.0120401		acetyltransferase
KKF80511.1	sodium:alanine symporter		K03310	271.93	551.9	4.6e-166	alanine or glycine:cation symporter, AGCS family	XF37_27355	1.26746	0.0378508		sodium:alanine symporter
KKF83125.1	damage-inducible protein YebG		K09918	47.9	151.8	4.4e-45	uncharacterized protein	XF37_15280	1.26603	0.000586541		damage-inducible protein YebG
KKF85298.1	cellulose synthase		K20543	262.8	468.6	2.1e-140	cellulose synthase operon protein C	XF37_02585	1.26587	0.000491836		cellulose synthase
KKF80504.1	Thr operon leader peptide		K08278	33.67	29.9	1.2e-07	thr operon leader peptide	XF37_27315	1.26359	0.044108		Thr operon leader peptide
KKF82178.1	cysteine methyltransferase		K07443	99.6	167.2	1.5e-49	methylated-DNA-protein-cysteine methyltransferase related protein	XF37_18615	1.25578	0.00656981		cysteine methyltransferase
KKF84476.1	glucose-1-phosphatase		K01085	359.2	710.5	1.5e-214	glucose-1-phosphatase [EC:3.1.3.10]	XF37_06830	1.24176	7.47834e-06		glucose-1-phosphatase
KKF82085.1	glutathione S-transferase		K11209	258	132.1	1e-38	GSH-dependent disulfide-bond oxidoreductase [EC:1.8.4.-]	XF37_19735	1.24053	0.00411877		glutathione S-transferase
KKF85418.1	hypothetical protein		K12681	2042.3	39	7.5e-11	pertactin	XF37_01930	1.23775	0.018659		hypothetical protein
KKF83579.1	hypothetical protein		K05594	43.73	103.2	3.7e-30	ElaB protein	XF37_11905	1.23214	4.43637e-07		hypothetical protein
KKF82491.1	damage-inducible protein DinI		K12149	45.1	113.7	1.5e-33	DNA-damage-inducible protein I	XF37_16505	1.23149	0.000616552		damage-inducible protein DinI
KKF85093.1	lysozyme		K12054	-	40.1	1.4e-10	lytic transglycosylase AtlA	XF37_03715	1.22565	0.0148615		lysozyme
KKF81995.1	murein L,D-transpeptidase		K21470	56.1	542	7.4e-163	L,D-transpeptidase YcbB	XF37_19270	1.21822	6.03243e-06		murein L,D-transpeptidase
KKF85194.1	hypothetical protein		K06918	244.13	662	1.5e-199	uncharacterized protein	XF37_03230	1.21771	1.11159e-06		hypothetical protein
KKF82769.1	rhsA		K24473	2145.07	73.8	1.1e-21	teneurin	XF37_15895	1.20586	0.00163859		rhsA
KKF82443.1	nitrogen regulation protein NR(II)	glnL	K07708	278.6	460.6	1.5e-138	two-component system, NtrC family, nitrogen regulation sensor histidine	XF37_17895	1.20583	2.67098e-05	glnL	nitrogen regulation protein NR(II)
KKF81960.1	hypothetical protein		K06929	72.77	228.6	2.2e-68	uncharacterized protein	XF37_19055	1.20357	0.00142549		hypothetical protein
KKF84639.1	glutaminase		K01425	94.43	407.4	3.5e-122	glutaminase [EC:3.5.1.2]	XF37_06100	1.19977	0.000216823		glutaminase
KKF83755.1	sugar ABC transporter substrate-binding protein		K23545	245.03	511.3	2.6e-154	sugar transport system substrate-binding protein	XF37_09945	1.19932	0.00206915		sugar ABC transporter substrate-binding protein
KKF80804.1	transposase		K07493	61.33	70.3	4.5e-20	putative transposase	XF37_26380	1.19923	0.00293897		transposase
KKF82666.1	cell division inhibition protein DicB		K22304	100.67	124	4.5e-37	cell division inhibition protein DicB	XF37_16445	1.19876	0.0233476		cell division inhibition protein DicB
KKF85174.1	transcriptional regulator		K14057	253.67	380.2	2.3e-114	LysR family transcriptional regulator, regulator of abg operon	XF37_03120	1.19742	0.00299874		transcriptional regulator
KKF84627.1	membrane protein		K07340	72.3	167.9	8.3e-50	inner membrane protein	XF37_06040	1.19692	0.00950381		membrane protein
KKF84136.1	L-fucose transporter		K02429	155.63	490.3	1.3e-147	MFS transporter, FHS family, L-fucose permease	XF37_08920	1.19632	0.000689589		L-fucose transporter
KKF85241.1	membrane protein		K08992	33.87	80.4	5.1e-23	lipopolysaccharide assembly protein A	XF37_03480	1.19535	0.000143223		membrane protein
KKF82299.1	propionate catabolism operon regulatory protein PrpR		K02688	526.83	725.1	2.4e-218	transcriptional regulator, propionate catabolism operon regulatory prot	XF37_18325	1.1926	0.00867112		propionate catabolism operon regulatory protein PrpR
KKF81720.1	acetylornithine aminotransferase	argD	K00840	705.33	688.7	5.4e-208	succinylornithine aminotransferase [EC:2.6.1.81]	XF37_22190	1.19055	1.05567e-06	argD	acetylornithine aminotransferase
KKF85291.1	membrane protein		K07058	37.93	195	7.9e-58	membrane protein	XF37_02540	1.1875	0.0149222		membrane protein
KKF81858.1	hypothetical protein		K07352	183.1	27	8.8e-07	type 1 fimbrial protein	XF37_20925	1.17316	0.0382241		hypothetical protein
KKF84267.1	hydroxyglutarate oxidase		K15736	546.27	637	1.5e-191	(S)-2-hydroxyglutarate dehydrogenase [EC:1.1.5.13]	XF37_09665	1.17288	4.66828e-05		hydroxyglutarate oxidase
KKF82949.1	murein lipoprotein		K06078	33.83	109	7.1e-32	murein lipoprotein	XF37_14355	1.17234	2.753e-07		murein lipoprotein
KKF84137.1	fuculose phosphate aldolase		K01628	214.23	290.2	6.5e-87	L-fuculose-phosphate aldolase [EC:4.1.2.17]	XF37_08925	1.17082	0.00301735		fuculose phosphate aldolase
KKF82533.1	PTS galactitol transporter subunit IIC		K02775	362.83	674.5	2.4e-203	galactitol PTS system EIIC component	XF37_16725	1.17068	0.0251121		PTS galactitol transporter subunit IIC
KKF81006.1	glycine/betaine ABC transporter		K03762	466.37	668.5	3e-201	MFS transporter, MHS family, proline/betaine transporter	XF37_24970	1.17002	9.4971e-05		glycine/betaine ABC transporter
KKF83009.1	PTS system N,N'-diacetylchitobiose-specific transporter subunit IIB		K02760	69	125.5	6.8e-37	cellobiose PTS system EIIB component [EC:2.7.1.196 2.7.1.205]	XF37_14670	1.16183	0.0187872		PTS system N,N'-diacetylchitobiose-specific transporter subunit IIB
KKF82090.1	transcriptional regulator, XRE family protein		K07726	43.97	55.5	1.6e-15	putative transcriptional regulator	XF37_19760	1.15955	0.0221514		transcriptional regulator, XRE family protein
KKF85581.1	arylsulfatase		K01134	514.2	332.2	2.2e-99	arylsulfatase A [EC:3.1.6.8]	XF37_01195	1.1519	0.0228642		arylsulfatase
KKF85509.1	bacterioferritin		K03594	83.17	229.5	1.6e-68	bacterioferritin [EC:1.16.3.1]	XF37_01785	1.15167	4.27061e-06		bacterioferritin
KKF80886.1	lambda family phage tail tape measure protein		K05637	1333.97	17.5	8.8e-05	laminin, alpha 1/2	XF37_25800	1.15146	0.000335		lambda family phage tail tape measure protein
KKF83143.1	hydrolase		K23359	213.5	146.3	4.3e-43	biuret amidohydrolase [EC:3.5.1.84]	XF37_15380	1.14914	0.00527214		hydrolase
KKF81179.1	transcriptional regulator		K05880	640.17	1044	0	transcriptional activator for dhaKLM operon	XF37_23990	1.14663	0.00414702		transcriptional regulator
KKF83578.1	membrane protein		K16937	67.77	21.8	3.2e-05	thiosulfate dehydrogenase (quinone) large subunit [EC:1.8.5.2]	XF37_11900	1.14648	4.51728e-05		membrane protein
KKF80477.1	hypothetical protein		K07001	109.3	80.4	4e-23	NTE family protein	XF37_27165	1.14595	0.00276131		hypothetical protein
KKF80700.1	DL-methionine transporter permease subunit		K02072	147.9	342.8	8e-103	D-methionine transport system permease protein	XF37_28340	1.14527	1.5592e-05		DL-methionine transporter permease subunit
KKF83900.1	adenosine-3'(2'),5'-bisphosphate nucleotidase		K01082	177.3	298.5	2.2e-89	3'(2'), 5'-bisphosphate nucleotidase [EC:3.1.3.7]	XF37_10720	1.13945	6.15695e-05		adenosine-3'(2'),5'-bisphosphate nucleotidase
KKF84483.1	transcriptional regulator		K09017	119.37	224	1.6e-66	TetR/AcrR family transcriptional regulator	XF37_06880	1.13918	0.0136933		transcriptional regulator
KKF84789.1	transcriptional repressor IclR		K13641	260.23	311.8	1.9e-93	IclR family transcriptional regulator, acetate operon repressor	XF37_05540	1.13488	1.81263e-06		transcriptional repressor IclR
KKF80725.1	hypothetical protein		K18920	81.53	58.4	1.1e-16	protein HokA	XF37_26585	1.13403	0.00491877		hypothetical protein
KKF81083.1	esterase		K06889	111.77	89.1	9.7e-26	uncharacterized protein	XF37_25395	1.13372	0.0220688		esterase
KKF84138.1	1,2-propanediol oxidoreductase		K00048	558.83	685.6	4.9e-207	lactaldehyde reductase [EC:1.1.1.77]	XF37_08930	1.13239	0.000419144		1,2-propanediol oxidoreductase
KKF82324.1	S-(hydroxymethyl)glutathione dehydrogenase		K00121	623.87	679.8	1.2e-204	S-(hydroxymethyl)glutathione dehydrogenase / alcohol dehydrogenase [EC:	XF37_18460	1.13036	6.5092e-05		S-(hydroxymethyl)glutathione dehydrogenase
KKF82330.1	histidine kinase		K20263	389.43	555.7	4.8e-167	two-component system, NarL family, sensor histidine kinase FusK [EC:2.7	XF37_18490	1.13006	0.00170306		histidine kinase
KKF84841.1	2-octaprenyl-3-methyl-6-methoxy-1,4-benzoquinol hydroxylase	ubiF	K03184	445.63	615	1.4e-185	3-demethoxyubiquinol 3-hydroxylase [EC:1.14.99.60]	XF37_04700	1.12759	0.000372203	ubiF	2-octaprenyl-3-methyl-6-methoxy-1,4-benzoquinol hydroxylase
KKF82971.1	oxidoreductase		K00313	301.6	595.9	1.5e-179	electron transfer flavoprotein-quinone oxidoreductase [EC:1.5.5.-]	XF37_14470	1.12562	0.0159106		oxidoreductase
KKF82922.1	oxidoreductase		K23107	330.4	133.9	2.2e-39	1-deoxyxylulose-5-phosphate synthase [EC:1.1.-.-]	XF37_14200	1.12495	0.0135378		oxidoreductase
KKF84098.1	racemase		K01779	89	256	2.3e-76	aspartate racemase [EC:5.1.1.13]	XF37_08715	1.12417	0.0010065		racemase
KKF85785.1	D-ribose transporter subunit RbsB		K10439	195.2	315.7	2e-94	ribose transport system substrate-binding protein	XF37_00765	1.12304	2.73443e-05		D-ribose transporter subunit RbsB
KKF82312.1	beta-D-galactosidase	lacZ	K12111	1258.47	909.5	6.9e-274	evolved beta-galactosidase subunit alpha [EC:3.2.1.23]	XF37_18390	1.12264	0.00674538	lacZ	beta-D-galactosidase
KKF81730.1	potassium transporter KefB		K11747	743.77	849.6	3.1e-256	glutathione-regulated potassium-efflux system protein KefB	XF37_22240	1.11695	0.000186815		potassium transporter KefB
KKF84640.1	copper-transporting ATPase	copA	K17686	809.33	1025.5	0	P-type Cu+ transporter [EC:7.2.2.8]	XF37_06105	1.11334	6.36373e-07	copA	copper-transporting ATPase
KKF83905.1	methionine sulfoxide reductase A		K07304	61.23	310.3	8.1e-93	peptide-methionine (S)-S-oxide reductase [EC:1.8.4.11]	XF37_10745	1.11308	0.000224043		methionine sulfoxide reductase A
KKF84753.1	LexA repressor		K01356	134.7	251.9	3.8e-75	repressor LexA [EC:3.4.21.88]	XF37_05360	1.10901	5.51842e-05		LexA repressor
KKF85065.1	4-amino-4-deoxy-L-arabinose-phospho-UDP flippase		K12962	84.43	123.7	1.7e-36	undecaprenyl phosphate-alpha-L-ara4N flippase subunit ArnE	XF37_04235	1.10735	0.018659		4-amino-4-deoxy-L-arabinose-phospho-UDP flippase
KKF85723.1	heat shock protein IbpA		K04080	194.17	233.4	6.4e-70	molecular chaperone IbpA	XF37_00425	1.1073	5.20794e-05		heat shock protein IbpA
KKF81383.1	hypothetical protein		K06518	54.4	138.6	5.6e-41	holin-like protein	XF37_23515	1.10675	0.0136249		hypothetical protein
KKF82718.1	DNA-binding protein		K07741	32.97	99.7	8.7e-29	anti-repressor protein	XF37_16180	1.10509	0.000387346		DNA-binding protein
KKF82041.1	hypothetical protein		K07459	146.1	310.6	9.3e-93	putative ATP-dependent endonuclease of the OLD family	XF37_19505	1.1001	0.000198929		hypothetical protein
KKF83126.1	phosphoribosylglycinamide formyltransferase		K08289	256.67	761.6	3.3e-229	phosphoribosylglycinamide formyltransferase 2 [EC:2.1.2.2]	XF37_15285	1.09987	0.0343458		phosphoribosylglycinamide formyltransferase
KKF80584.1	cell division protein MraZ		K03925	36.67	164.6	5.7e-49	MraZ protein	XF37_27755	1.09886	3.20339e-05		cell division protein MraZ
KKF81080.1	isovaleryl-CoA dehydrogenase		K09456	445.4	845	1.3e-254	putative acyl-CoA dehydrogenase	XF37_25380	1.09583	1.3298e-05		isovaleryl-CoA dehydrogenase
KKF83691.1	glutamate synthase	gltB	K00265	2016.53	2145.5	0	glutamate synthase (NADPH) large chain [EC:1.4.1.13]	XF37_11335	1.09566	3.08149e-05	gltB	glutamate synthase
KKF85475.1	large-conductance mechanosensitive channel	mscL	K03282	40.8	198.5	3.4e-59	large conductance mechanosensitive channel	XF37_01615	1.09537	8.24977e-06	mscL	large-conductance mechanosensitive channel
KKF85244.1	aconitate hydratase		K01681	1294.73	1540.4	0	aconitate hydratase [EC:4.2.1.3]	XF37_03495	1.09349	3.02376e-06		aconitate hydratase
KKF83868.1	esterase		K21469	463.17	530.8	1.3e-159	serine-type D-Ala-D-Ala carboxypeptidase [EC:3.4.16.4]	XF37_10530	1.09341	0.0202078		esterase
KKF83771.1	transcriptional regulator		K13643	166.27	231.6	5.5e-69	Rrf2 family transcriptional regulator, iron-sulfur cluster assembly tra	XF37_10030	1.09141	8.5993e-07		transcriptional regulator
KKF85180.1	universal stress protein UspE		K14055	156.03	468.2	6.4e-141	universal stress protein E	XF37_03155	1.08531	1.93172e-06		universal stress protein UspE
KKF85783.1	sugar ABC transporter ATP-binding protein		K10441	708.03	757.4	7.5e-228	ribose transport system ATP-binding protein [EC:7.5.2.7]	XF37_00755	1.0828	0.0180808		sugar ABC transporter ATP-binding protein
KKF83523.1	acetyltransferase		K03824	66.5	182.6	4.1e-54	putative acetyltransferase [EC:2.3.1.-]	XF37_11620	1.07686	0.0125917		acetyltransferase
KKF83907.1	translocation and assembly module TamB		K09800	98.5	584	3.3e-175	translocation and assembly module TamB	XF37_10760	1.07509	1.90004e-05		translocation and assembly module TamB
KKF83060.1	diguanylate cylase		K21085	258.57	161.5	1.3e-47	diguanylate cyclase [EC:2.7.7.65]	XF37_14935	1.07497	0.00158955		diguanylate cylase
KKF81978.1	cell division protein ZapC		K18657	112.83	276.4	2.4e-83	cell division protein ZapC	XF37_19160	1.07146	0.000753251		cell division protein ZapC
KKF81246.1	type IV secretion protein Rhs		K24473	2145.07	62	3.8e-18	teneurin	XF37_23685	1.06869	0.0339199		type IV secretion protein Rhs
KKF82592.1	3-methyladenine DNA glycosylase		K13529	347.33	284.5	6e-85	AraC family transcriptional regulator, regulatory protein of adaptative	XF37_17030	1.06765	0.03282		3-methyladenine DNA glycosylase
KKF81310.1	alpha-ketoglutarate-dependent dioxygenase		K03919	185.37	295	1.4e-88	DNA oxidative demethylase [EC:1.14.11.33]	XF37_23140	1.06467	0.0126673		alpha-ketoglutarate-dependent dioxygenase
KKF82994.1	6-phosphofructokinase		K16370	308.47	409.5	4.8e-123	6-phosphofructokinase 2 [EC:2.7.1.11]	XF37_14595	1.06282	0.000396044		6-phosphofructokinase
KKF83781.1	3-mercaptopyruvate sulfurtransferase	sseA	K01011	194.87	323.7	5.8e-97	thiosulfate/3-mercaptopyruvate sulfurtransferase [EC:2.8.1.1 2.8.1.2]	XF37_10080	1.06261	1.55858e-05	sseA	3-mercaptopyruvate sulfurtransferase
KKF82114.1	glutamine ABC transporter substrate-bindnig protein	glnH	K10036	271.87	339.1	8.8e-102	glutamine transport system substrate-binding protein	XF37_19890	1.06102	3.14252e-06	glnH	glutamine ABC transporter substrate-bindnig protein
KKF85113.1	colanic acid/biofilm transcriptional regulator		K13654	180.03	336.5	1.8e-101	GntR family transcriptional regulator, colanic acid and biofilm gene tr	XF37_02790	1.06093	0.0116107		colanic acid/biofilm transcriptional regulator
KKF81633.1	glycerol-3-phosphate transporter permease		K05814	337.23	405.4	4.4e-122	sn-glycerol 3-phosphate transport system permease protein	XF37_21740	1.05941	0.0107969		glycerol-3-phosphate transporter permease
KKF82311.1	galactoside permease	lacY	K02532	182.9	590.1	5.6e-178	MFS transporter, OHS family, lactose permease	XF37_18385	1.05726	0.0182239	lacY	galactoside permease
KKF82380.1	septal ring assembly protein ZapB		K09892	33.7	62.6	1.1e-17	cell division protein ZapB	XF37_17545	1.05194	0.0264631		septal ring assembly protein ZapB
KKF84868.1	hypothetical protein		K09158	33.23	125.4	4.6e-37	uncharacterized protein	XF37_04850	1.0495	0.000765728		hypothetical protein
KKF85228.1	major facilitator transporter		K07552	305.97	399.3	7e-120	MFS transporter, DHA1 family, multidrug resistance protein	XF37_03405	1.04521	0.0332063		major facilitator transporter
KKF81378.1	dihydropyrimidine dehydrogenase		K17722	457	471.5	7.6e-142	dihydropyrimidine dehydrogenase (NAD+) subunit PreT [EC:1.3.1.1]	XF37_23490	1.04444	0.00029673		dihydropyrimidine dehydrogenase
KKF83421.1	amino acid ABC transporter permease		K09970	183.63	569	3.6e-171	general L-amino acid transport system permease protein	XF37_11065	1.04428	0.0459522		amino acid ABC transporter permease
KKF81540.1	LuxR family transcriptional regulator		K21907	207.33	300.7	9e-91	LuxR family transcriptional regulator, glutamate-dependent acid resista	XF37_21245	1.04081	1.30759e-06		LuxR family transcriptional regulator
KKF80436.1	hypothetical protein		K19577	368.97	56.2	9e-16	MFS transporter, DHA1 family, inner membrane transport protein	XF37_26930	1.03694	0.0100938		hypothetical protein
KKF83336.1	lysozyme		K01185	24.3	25.5	2.6e-06	lysozyme [EC:3.2.1.17]	XF37_12930	1.0349	0.045661		lysozyme
KKF81503.1	endopeptidase		K14744	30.3	189.8	1.9e-56	prophage endopeptidase [EC:3.4.-.-]	XF37_22465	1.03479	0.0206372		endopeptidase
KKF84626.1	protease		K17286	382.23	164.8	9.5e-49	erythrocyte band 7 integral membrane protein	XF37_06035	1.03454	0.000341277		protease
KKF83374.1	hypothetical protein		K18919	80.2	111.4	3.2e-33	protein HokC/D	XF37_12785	1.03369	2.39875e-05		hypothetical protein
KKF82096.1	glutathione ABC transporter ATP-binding protein		K13892	953.57	1068.8	0	glutathione transport system ATP-binding protein	XF37_19790	1.0319	0.000103846		glutathione ABC transporter ATP-binding protein
KKF84833.1	porin		K18093	410.33	32.3	1.4e-08	imipenem/basic amino acid-specific outer membrane pore [EC:3.4.21.-]	XF37_04625	1.03114	0.0226017		porin
KKF80977.1	transporter		K15550	375.63	741.3	1.2e-223	outer membrane protein, multidrug efflux system	XF37_24810	1.03102	0.0190679		transporter
KKF84699.1	addiction module toxin, RelE/StbE family protein		K19157	49.2	85.4	1e-24	mRNA interferase YafQ [EC:3.1.-.-]	XF37_05815	1.02961	0.000766259		addiction module toxin, RelE/StbE family protein
KKF85238.1	lipoprotein		K04062	43.43	91.6	1.7e-26	osmotically inducible lipoprotein OsmB	XF37_03460	1.02763	0.000137069		lipoprotein
KKF85116.1	membrane protein		K09936	42.3	102.4	8.4e-30	bacterial/archaeal transporter family-2 protein	XF37_02805	1.01836	0.0210662		membrane protein
KKF80991.1	aminoalkylphosphonic acid N-acetyltransferase		K09994	98.77	233.2	3e-70	(aminoalkyl)phosphonate N-acetyltransferase [EC:2.3.1.280]	XF37_24885	1.0176	0.0186806		aminoalkylphosphonic acid N-acetyltransferase
KKF84129.1	transcriptional regulator		K03566	199.87	397.2	2.5e-119	LysR family transcriptional regulator, glycine cleavage system transcri	XF37_08885	1.0138	0.00526424		transcriptional regulator
KKF84623.1	hypothetical protein		K05838	169.1	310.2	7.2e-93	putative thioredoxin	XF37_06020	1.01347	0.00115866		hypothetical protein
KKF82125.1	dehydrogenase		K13574	408.83	592.4	6.8e-179	hydroxycarboxylate dehydrogenase B [EC:1.1.1.237 1.1.1.-]	XF37_19945	1.01318	0.000168536		dehydrogenase
KKF83198.1	metal-binding protein		K22391	159.03	82.4	1.2e-23	GTP cyclohydrolase I [EC:3.5.4.16]	XF37_13190	1.00992	4.44094e-05		metal-binding protein
KKF83076.1	dioxygenase		K22443	320.97	475.4	8.5e-143	carnitine monooxygenase subunit [EC:1.14.13.239]	XF37_15020	1.0099	0.0274081		dioxygenase
KKF82214.1	oxidoreductase		K23107	330.4	521.2	5.3e-157	1-deoxyxylulose-5-phosphate synthase [EC:1.1.-.-]	XF37_18795	1.00947	0.000968781		oxidoreductase
KKF83207.1	type II citrate synthase	gltA	K01647	366.37	467.4	1.8e-140	citrate synthase [EC:2.3.3.1]	XF37_13240	1.00915	7.32048e-05	gltA	type II citrate synthase
KKF80737.1	ninB protein		K19779	113.33	171	1.1e-51	endodeoxyribonuclease RalR [EC:3.1.-.-]	XF37_26535	1.00902	0.0110842		ninB protein
KKF82126.1	glycosyl transferase		K00766	101.87	102.1	9.9e-30	anthranilate phosphoribosyltransferase [EC:2.4.2.18]	XF37_19950	1.00703	0.00141876		glycosyl transferase
KKF83390.1	transcriptional regulator		K02099	176.07	138.4	1.4e-40	AraC family transcriptional regulator, arabinose operon regulatory prot	XF37_12580	1.00669	0.0130014		transcriptional regulator
KKF80754.1	endopeptidase		K14744	30.3	190.8	9.1e-57	prophage endopeptidase [EC:3.4.-.-]	XF37_26420	1.00196	0.0183972		endopeptidase
KKF83727.1	L-aspartate oxidase		K00278	552.93	794.2	4.2e-239	L-aspartate oxidase [EC:1.4.3.16]	XF37_09800	1.00172	0.0405457		L-aspartate oxidase
KKF81426.1	tellurium resistance protein TerC		K05794	131.8	375	1.8e-112	tellurite resistance protein TerC	XF37_22935	-1.00026	0.000263639		tellurium resistance protein TerC
KKF80533.1	ribonucleoside hydrolase		K12700	372.03	501.7	2.1e-151	non-specific riboncleoside hydrolase [EC:3.2.-.-]	XF37_27475	-1.00308	0.00454025		ribonucleoside hydrolase
KKF83737.1	DNA repair protein RecO	recO	K03584	30.83	203.1	2e-60	DNA repair protein RecO (recombination protein O)	XF37_09850	-1.0032	0.000504199	recO	DNA repair protein RecO
KKF83631.1	hypothetical protein		K01460	759.9	175.4	4.4e-52	glutathionylspermidine amidase/synthetase [EC:3.5.1.78 6.3.1.8]	XF37_12200	-1.00344	0.00111989		hypothetical protein
KKF82620.1	UTP--glucose-1-phosphate uridylyltransferase		K00963	92.57	150	3.9e-44	UTP--glucose-1-phosphate uridylyltransferase [EC:2.7.7.9]	XF37_17175	-1.00386	0.000185638		UTP--glucose-1-phosphate uridylyltransferase
KKF82204.1	cytochrome o ubiquinol oxidase subunit IV		K02299	260.87	172.5	4e-51	cytochrome o ubiquinol oxidase subunit III	XF37_18745	-1.00509	0.00120015		cytochrome o ubiquinol oxidase subunit IV
KKF81700.1	DNA adenine methylase		K06223	64.2	271.4	5.5e-81	DNA adenine methylase [EC:2.1.1.72]	XF37_22090	-1.008	0.00454689		DNA adenine methylase
KKF85039.1	transcriptional regulator		K21703	290.07	148.6	8e-44	LysR family transcriptional regulator, low CO2-responsive transcription	XF37_04095	-1.01029	0.00914205		transcriptional regulator
KKF84500.1	oxidoreductase		K00065	332.67	296.1	9.7e-89	2-dehydro-3-deoxy-D-gluconate 5-dehydrogenase [EC:1.1.1.127]	XF37_06975	-1.01038	0.0111835		oxidoreductase
KKF84887.1	nucleoside diphosphate kinase regulator		K06140	88.93	203.6	1e-60	regulator of nucleoside diphosphate kinase	XF37_04955	-1.01402	0.0094027		nucleoside diphosphate kinase regulator
KKF81135.1	biotin--[acetyl-CoA-carboxylase] synthetase		K03524	157.43	250	1.4e-74	BirA family transcriptional regulator, biotin operon repressor / biotin	XF37_24440	-1.01408	0.02259		biotin--[acetyl-CoA-carboxylase] synthetase
KKF83626.1	hypothetical protein		K09806	31.7	134.1	1.7e-39	uncharacterized protein	XF37_12175	-1.02362	0.00899376		hypothetical protein
KKF80335.1	CAAX protease		K07052	31.7	63.6	5.6e-18	uncharacterized protein	XF37_28605	-1.0241	0.0037649		CAAX protease
KKF83964.1	adenine glycosylase		K03575	147.57	467.6	2.3e-140	A/G-specific adenine glycosylase [EC:3.2.2.31]	XF37_07975	-1.02472	0.00274702		adenine glycosylase
KKF83431.1	ribosomal protein L11 methyltransferase	prmA	K02687	101.6	365.6	2e-109	ribosomal protein L11 methyltransferase [EC:2.1.1.-]	XF37_11120	-1.0271	0.00564434	prmA	ribosomal protein L11 methyltransferase
KKF84777.1	23S rRNA pseudouridylate synthase		K06182	248.93	414.4	1.6e-124	23S rRNA pseudouridine2604 synthase [EC:5.4.99.21]	XF37_05480	-1.02804	0.0199902		23S rRNA pseudouridylate synthase
KKF83304.1	type II secretion system protein J		K02459	59.73	170.7	1.3e-50	general secretion pathway protein J	XF37_13020	-1.02949	0.00476283		type II secretion system protein J
KKF85061.1	O-succinylbenzoate synthase		K02549	214.17	272	3.2e-81	O-succinylbenzoate synthase [EC:4.2.1.113]	XF37_04215	-1.02966	0.0051003		O-succinylbenzoate synthase
KKF83299.1	general secretion pathway protein GspE		K02454	609.87	643.5	1.2e-193	general secretion pathway protein E [EC:7.4.2.8]	XF37_12995	-1.03207	0.000206246		general secretion pathway protein GspE
KKF81398.1	beta-D-glucoside glucohydrolase		K05349	318.8	736	1.9e-221	beta-glucosidase [EC:3.2.1.21]	XF37_23590	-1.03392	0.00193592		beta-D-glucoside glucohydrolase
KKF81054.1	poxB regulator PoxA		K04568	303.07	486.4	1.5e-146	elongation factor P--(R)-beta-lysine ligase [EC:6.3.1.-]	XF37_25230	-1.03407	0.00284825		poxB regulator PoxA
KKF80397.1	DEAD/DEAH box helicase		K06877	289.7	416.6	6.2e-125	DEAD/DEAH box helicase domain-containing protein	XF37_26715	-1.03473	6.03243e-06		DEAD/DEAH box helicase
KKF85801.1	ribokinase		K00852	230.17	396.6	6.6e-119	ribokinase [EC:2.7.1.15]	XF37_00770	-1.03487	0.0133084		ribokinase
KKF81259.1	type VI secretion protein		K11893	108.43	471.8	1.2e-141	type VI secretion system protein ImpJ	XF37_23750	-1.03617	0.0087451		type VI secretion protein
KKF83655.1	cell division protein FtsI		K04753	510.83	556	3e-167	suppressor of ftsI	XF37_12320	-1.03852	0.046172		cell division protein FtsI
KKF83952.1	DNA replication initiation factor		K10763	169.73	313.2	4.5e-94	DnaA-homolog protein	XF37_10230	-1.03905	0.0198154		DNA replication initiation factor
KKF83511.1	ribosome-binding factor A	rbfA	K02834	33.57	168.2	8.7e-50	ribosome-binding factor A	XF37_11560	-1.04097	0.0369151	rbfA	ribosome-binding factor A
KKF84964.1	integrase		K14059	184.6	107.8	3.2e-31	integrase	XF37_04460	-1.04422	0.0106915		integrase
KKF85069.1	UDP phosphate 4-deoxy-4-formamido-L-arabinose transferase		K10012	359.37	504.3	3.9e-152	undecaprenyl-phosphate 4-deoxy-4-formamido-L-arabinose transferase [EC:	XF37_04255	-1.04456	0.00275255		UDP phosphate 4-deoxy-4-formamido-L-arabinose transferase
KKF83950.1	tRNA adenosine deaminase		K11991	169.27	279.3	2.4e-83	tRNA(adenine34) deaminase [EC:3.5.4.33]	XF37_09890	-1.04687	0.0116107		tRNA adenosine deaminase
KKF82087.1	biofilm formation regulatory protein BssR	bssR	K19688	146.7	208.1	8.9e-63	biofilm regulator BssR	XF37_19745	-1.04726	0.0134128	bssR	biofilm formation regulatory protein BssR
KKF84724.1	integrase		K21039	157.93	313	8e-94	enterobacteria phage integrase [EC:2.7.7.- 3.1.-.-]	XF37_05665	-1.04727	0.016214		integrase
KKF83029.1	thiosulfate sulfurtransferase		K21028	248.7	600.9	1e-180	molybdopterin synthase sulfurtransferase [EC:2.8.1.11]	XF37_14770	-1.04909	0.0236596		thiosulfate sulfurtransferase
KKF83555.1	galactonate transporter		K12299	753.07	854.4	5.7e-258	MFS transporter, ACS family, probable galactarate transporter	XF37_11780	-1.05195	0.00536302		galactonate transporter
KKF85754.1	transcriptional regulator PhoU		K02039	115.33	268	4.9e-80	phosphate transport system protein	XF37_00600	-1.0549	0.0472167		transcriptional regulator PhoU
KKF80616.1	transcriptional regulator PdhR	pdhR	K14348	253.87	206.1	2.3e-61	GntR family transcriptional regulator, L-lactate dehydrogenase operon r	XF37_27915	-1.05924	0.0143089	pdhR	transcriptional regulator PdhR
KKF84671.1	hypothetical protein		K11021	132.8	38.9	1e-10	insecticidal toxin complex protein TccC	XF37_05970	-1.0631	0.0167577		hypothetical protein
KKF83795.1	GTP-binding protein Der		K03977	254.77	660.5	6.9e-199	GTPase	XF37_10150	-1.06319	9.95985e-05		GTP-binding protein Der
KKF83482.1	sugar ABC transporter ATP-binding protein		K06861	276.03	448.4	9.8e-135	lipopolysaccharide export system ATP-binding protein [EC:3.6.3.-]	XF37_11390	-1.06381	0.000425155		sugar ABC transporter ATP-binding protein
KKF81607.1	methyltransferase		K21460	463.5	123	4.1e-36	L-tyrosine C(3)-methyltransferase [EC:2.1.1.304]	XF37_21605	-1.06533	0.000137318		methyltransferase
KKF83887.1	hypothetical protein		K14347	142.3	422.4	8.3e-127	solute carrier family 10 (sodium/bile acid cotransporter), member 7	XF37_10630	-1.06848	0.00854856		hypothetical protein
KKF82452.1	protein disulfide isomerase		K03673	71.93	218.4	4.6e-65	protein dithiol oxidoreductase (disulfide-forming) [EC:1.8.4.15]	XF37_17945	-1.06854	4.83115e-05		protein disulfide isomerase
KKF81186.1	outer membrane lipoprotein LolB	lolB	K02494	41.27	195.6	2.8e-58	outer membrane lipoprotein LolB	XF37_24035	-1.07405	0.00843509	lolB	outer membrane lipoprotein LolB
KKF85232.1	enoyl-ACP reductase		K00208	267.73	405	1.1e-121	enoyl-[acyl-carrier protein] reductase I [EC:1.3.1.9 1.3.1.10]	XF37_03430	-1.07548	1.05388e-05		enoyl-ACP reductase
KKF80368.1	urease subunit beta	ureB	K01429	171.93	190.2	1.1e-56	urease subunit beta [EC:3.5.1.5]	XF37_28390	-1.07584	0.0277336	ureB	urease subunit beta
KKF80777.1	sensor protein PhoQ		K07637	251.83	537.8	6.6e-162	two-component system, OmpR family, sensor histidine kinase PhoQ [EC:2.7	XF37_26250	-1.07902	0.000431635		sensor protein PhoQ
KKF81183.1	peptidyl-tRNA hydrolase		K01056	50.17	248.3	3.7e-74	peptidyl-tRNA hydrolase, PTH1 family [EC:3.1.1.29]	XF37_24010	-1.07947	0.000831452		peptidyl-tRNA hydrolase
KKF84625.1	ABC transporter ATP-binding protein		K02068	240.4	320.5	3.4e-96	putative ABC transport system ATP-binding protein	XF37_06030	-1.08242	0.00217828		ABC transporter ATP-binding protein
KKF83225.1	glutamate mutase		K19268	323.83	595.1	2.6e-179	methylaspartate mutase epsilon subunit [EC:5.4.99.1]	XF37_13330	-1.08646	0.038821		glutamate mutase
KKF85389.1	formamidopyrimidine-DNA glycosylase		K10563	198.8	361.9	1.7e-108	formamidopyrimidine-DNA glycosylase [EC:3.2.2.23 4.2.99.18]	XF37_02230	-1.08916	0.0195475		formamidopyrimidine-DNA glycosylase
KKF84119.1	protease		K01407	853.73	1611.3	0	protease III [EC:3.4.24.55]	XF37_08820	-1.08942	0.000104322		protease
KKF85747.1	6-phosphogluconate phosphatase		K01838	173.03	119.5	5.5e-35	beta-phosphoglucomutase [EC:5.4.2.6]	XF37_00560	-1.09091	0.0197753		6-phosphogluconate phosphatase
KKF81209.1	hypothetical protein		K09858	64.47	209.8	1.3e-62	SEC-C motif domain protein	XF37_24165	-1.09274	0.000944144		hypothetical protein
KKF82915.1	pyridoxamine 5'-phosphate oxidase		K00275	29.33	271.1	4.7e-81	pyridoxamine 5'-phosphate oxidase [EC:1.4.3.5]	XF37_14155	-1.09543	0.0001489		pyridoxamine 5'-phosphate oxidase
KKF83239.1	peptidoglycan-associated outer membrane lipoprotein		K03640	145.7	189.3	2.3e-56	peptidoglycan-associated lipoprotein	XF37_13405	-1.09551	3.27252e-05		peptidoglycan-associated outer membrane lipoprotein
KKF84276.1	ribose 5-phosphate isomerase		K01807	60.93	304.6	2.7e-91	ribose 5-phosphate isomerase A [EC:5.3.1.6]	XF37_08240	-1.09698	6.36822e-05		ribose 5-phosphate isomerase
KKF81070.1	adenylosuccinate synthetase		K01939	96.93	649.9	1e-195	adenylosuccinate synthase [EC:6.3.4.4]	XF37_25330	-1.09862	0.00127843		adenylosuccinate synthetase
KKF84933.1	LexA regulated protein		K07722	56.47	22.5	2.6e-05	CopG family transcriptional regulator, nickel-responsive regulator	XF37_04590	-1.10094	0.0136174		LexA regulated protein
KKF84858.1	LPS biosynthesis protein		K03643	37.4	150.3	3.5e-44	LPS-assembly lipoprotein	XF37_04800	-1.10111	0.0161952		LPS biosynthesis protein
KKF82679.1	transcriptional regulator		K03497	70.67	26.8	8.5e-07	ParB family transcriptional regulator, chromosome partitioning protein	XF37_16350	-1.10363	0.0267426		transcriptional regulator
KKF84878.1	two-component response regulator DpiA	dpiA	K07702	266	331.3	8.3e-100	two-component system, CitB family, response regulator CitB	XF37_04905	-1.10439	0.0319282	dpiA	two-component response regulator DpiA
KKF85183.1	peptide ABC transporter substrate-binding protein		K15580	349	581.4	1e-174	oligopeptide transport system substrate-binding protein	XF37_03170	-1.10625	0.000630273		peptide ABC transporter substrate-binding protein
KKF85755.1	phosphate ABC transporter ATP-binding protein		K02036	261.97	446.1	2e-134	phosphate transport system ATP-binding protein [EC:7.3.2.1]	XF37_00605	-1.10653	0.00477055		phosphate ABC transporter ATP-binding protein
KKF84592.1	30S ribosomal protein S16		K02959	27.83	127.9	2e-37	small subunit ribosomal protein S16	XF37_06360	-1.10683	0.000349071		30S ribosomal protein S16
KKF80840.1	membrane protein		K07038	24.67	82.3	1e-23	inner membrane protein	XF37_26065	-1.10752	0.0182237		membrane protein
KKF80367.1	urease subunit alpha	ureC	K01428	605.7	976.9	2e-294	urease subunit alpha [EC:3.5.1.5]	XF37_28385	-1.10762	0.00297305	ureC	urease subunit alpha
KKF81436.1	hypothetical protein		K24084	482.97	181.6	6.3e-54	quorum-quenching protein AidA	XF37_22790	-1.11007	0.00542848		hypothetical protein
KKF81334.1	nucleoid-associated protein NdpA		K06899	119.27	454.5	1e-136	nucleoid-associated protein	XF37_23270	-1.11224	5.58837e-05		nucleoid-associated protein NdpA
KKF84156.1	CTP synthetase	pyrG	K01937	105.87	869.7	6.5e-262	CTP synthase [EC:6.3.4.2]	XF37_09030	-1.1131	1.28098e-06	pyrG	CTP synthetase
KKF84511.1	aminomethyltransferase		K00605	312.7	186.9	1.9e-55	aminomethyltransferase [EC:2.1.2.10]	XF37_07040	-1.11598	0.0164553		aminomethyltransferase
KKF82508.1	methionine--tRNA ligase	metG	K01874	210.57	679.2	3.2e-204	methionyl-tRNA synthetase [EC:6.1.1.10]	XF37_16595	-1.11749	4.34429e-06	metG	methionine--tRNA ligase
KKF83970.1	hypothetical protein		K19839	443.4	20.2	4.7e-05	Rho-type GTPase-activating protein 1/2	XF37_08005	-1.11876	0.00428591		hypothetical protein
KKF84859.1	DNA polymerase III subunit delta	holA	K02340	95.57	209.2	3.7e-62	DNA polymerase III subunit delta [EC:2.7.7.7]	XF37_04805	-1.11905	0.000796071	holA	DNA polymerase III subunit delta
KKF84338.1	glutaminase		K01425	94.43	411.8	1.6e-123	glutaminase [EC:3.5.1.2]	XF37_07730	-1.11926	0.0327011		glutaminase
KKF84708.1	type IV secretion protein Rhs		K11021	132.8	39.2	8.4e-11	insecticidal toxin complex protein TccC	XF37_05865	-1.11936	0.0217711		type IV secretion protein Rhs
KKF83002.1	cell division modulator		K15722	96.9	165.8	5.1e-50	cell division activator	XF37_14635	-1.12262	0.043078		cell division modulator
KKF84112.1	diacylglyceryl transferase		K13292	51	312.3	9.8e-94	phosphatidylglycerol---prolipoprotein diacylglyceryl transferase [EC:2.	XF37_08785	-1.12424	0.000121039		diacylglyceryl transferase
KKF82262.1	transcriptional regulator		K18900	323.23	255.8	1.8e-76	LysR family transcriptional regulator, regulator for bpeEF and oprC	XF37_18090	-1.12468	0.0201022		transcriptional regulator
KKF83167.1	dihydroneopterin triphosphate pyrophosphatase	nudB	K08310	91.9	224.9	1.7e-67	dihydroneopterin triphosphate diphosphatase [EC:3.6.1.67]	XF37_15370	-1.12495	0.000715723	nudB	dihydroneopterin triphosphate pyrophosphatase
KKF84489.1	iron permease		K07243	101.13	328.2	3.4e-98	high-affinity iron transporter	XF37_06910	-1.12527	0.00866931		iron permease
KKF80462.1	DNA replication protein DnaC		K10762	389.93	347.5	1.2e-104	putative replication protein	XF37_27080	-1.1269	5.64643e-05		DNA replication protein DnaC
KKF83240.1	tol-pal system protein		K05807	70.7	72.8	1.2e-20	outer membrane protein assembly factor BamD	XF37_13410	-1.12837	2.63465e-05		tol-pal system protein
KKF83106.1	multidrug MFS transporter		K08169	359.13	689.1	6.1e-208	MFS transporter, DHA2 family, multidrug resistance protein	XF37_15170	-1.12932	0.0130153		multidrug MFS transporter
KKF83214.1	2-oxoglutarate dehydrogenase		K00164	1085.5	1335.9	0	2-oxoglutarate dehydrogenase E1 component [EC:1.2.4.2]	XF37_13275	-1.13099	2.90636e-07		2-oxoglutarate dehydrogenase
KKF81816.1	hypothetical protein		K07040	30.63	108.5	1.4e-31	uncharacterized protein	XF37_20700	-1.13223	1.33591e-07		hypothetical protein
KKF82010.1	cytidylate kinase	cmk	K00945	82.8	316.7	9.1e-95	CMP/dCMP kinase [EC:2.7.4.25]	XF37_19345	-1.13274	2.99828e-06	cmk	cytidylate kinase
KKF83606.1	RNA polymerase sigma factor RpoD		K03086	462.63	622.2	3.6e-187	RNA polymerase primary sigma factor	XF37_12065	-1.13364	3.43514e-08		RNA polymerase sigma factor RpoD
KKF81134.1	UDP-N-acetylenolpyruvoylglucosamine reductase	murB	K00075	72.1	363.9	2.8e-109	UDP-N-acetylmuramate dehydrogenase [EC:1.3.1.98]	XF37_24435	-1.13586	0.000265641	murB	UDP-N-acetylenolpyruvoylglucosamine reductase
KKF82240.1	exonuclease SbcD		K03547	110.87	315.8	1.7e-94	DNA repair protein SbcD/Mre11	XF37_18925	-1.13646	0.0155846		exonuclease SbcD
KKF84230.1	hypothetical protein		K03743	208.7	255.2	2.5e-76	nicotinamide-nucleotide amidase [EC:3.5.1.42]	XF37_09450	-1.13709	0.0111959		hypothetical protein
KKF82677.1	helicase		K10742	469.17	181.3	7.5e-54	DNA replication ATP-dependent helicase Dna2 [EC:3.6.4.12]	XF37_16340	-1.13774	0.000853116		helicase
KKF81496.1	phospholipase		K07001	109.3	126.1	5.5e-37	NTE family protein	XF37_22500	-1.13833	0.00502385		phospholipase
KKF81970.1	Lon protease		K04770	456.23	877.1	2.6e-264	Lon-like ATP-dependent protease [EC:3.4.21.-]	XF37_19115	-1.13849	3.07437e-05		Lon protease
KKF83828.1	lipoprotein		K07287	39.23	214.8	7.9e-64	outer membrane protein assembly factor BamC	XF37_10325	-1.13932	2.18596e-06		lipoprotein
KKF84225.1	transcriptional regulator	srlR	K02468	293.23	450.3	6.2e-136	DeoR family transcriptional regulator, glucitol operon repressor	XF37_09415	-1.14064	0.00425343	srlR	transcriptional regulator
KKF82164.1	3-hydroxydecanoyl-ACP dehydratase		K01716	170.9	309.4	1.8e-93	3-hydroxyacyl-[acyl-carrier protein] dehydratase / trans-2-decenoyl-[ac	XF37_19120	-1.14095	0.00101482		3-hydroxydecanoyl-ACP dehydratase
KKF81728.1	ABC transporter ATP-binding protein		K06158	552.43	758.6	2.7e-228	ATP-binding cassette, subfamily F, member 3	XF37_22230	-1.14132	0.000178069		ABC transporter ATP-binding protein
KKF82908.1	elongation factor G		K03613	243.47	319.2	5.8e-96	Na+-translocating ferredoxin:NAD+ oxidoreductase subunit E	XF37_14120	-1.14147	0.00655177		elongation factor G
KKF84361.1	symporter		K08173	525.27	650.4	4.2e-196	MFS transporter, MHS family, metabolite:H+ symporter	XF37_07845	-1.14362	0.00775338		symporter
KKF81795.1	NADH dehydrogenase		K03885	219.47	433.3	3.9e-130	NADH:ubiquinone reductase (H+-translocating) [EC:7.1.1.2]	XF37_20595	-1.14418	0.0284784		NADH dehydrogenase
KKF81746.1	Hsp33-like chaperonin	hslO	K04083	63.9	330.3	4e-99	molecular chaperone Hsp33	XF37_22020	-1.14443	0.000628407	hslO	Hsp33-like chaperonin
KKF80485.1	phosphopentomutase		K01839	173.33	652	2.3e-196	phosphopentomutase [EC:5.4.2.7]	XF37_27205	-1.14486	3.45805e-06		phosphopentomutase
KKF84353.1	diguanylate cyclase		K13069	224.5	248.6	4e-74	diguanylate cyclase [EC:2.7.7.65]	XF37_07805	-1.14799	3.40109e-05		diguanylate cyclase
KKF83257.1	pyridoxal phosphate phosphatase		K21064	181.7	202.5	2.6e-60	5-amino-6-(5-phospho-D-ribitylamino)uracil phosphatase [EC:3.1.3.104]	XF37_13530	-1.14814	0.00561724		pyridoxal phosphate phosphatase
KKF82948.1	pyruvate kinase		K00873	98.77	697.1	8.7e-210	pyruvate kinase [EC:2.7.1.40]	XF37_14350	-1.15092	2.66947e-05		pyruvate kinase
KKF82739.1	ethanol-active dehydrogenase/acetaldehyde-active reductase	adhP	K13953	337.5	448	1e-134	alcohol dehydrogenase, propanol-preferring [EC:1.1.1.1]	XF37_16010	-1.15092	1.09014e-05	adhP	ethanol-active dehydrogenase/acetaldehyde-active reductase
KKF84150.1	histidine kinase		K07678	634.7	929.2	7.5e-280	two-component system, NarL family, sensor histidine kinase BarA [EC:2.7	XF37_09000	-1.15129	0.022215		histidine kinase
KKF84934.1	leucine--tRNA ligase	leuS	K01869	404.73	1199.3	0	leucyl-tRNA synthetase [EC:6.1.1.4]	XF37_04795	-1.15212	1.40447e-06	leuS	leucine--tRNA ligase
KKF81335.1	50S ribosomal protein L25		K02897	34.93	124.8	1.2e-36	large subunit ribosomal protein L25	XF37_23275	-1.15228	0.00160215		50S ribosomal protein L25
KKF81392.1	multidrug resistance outer membrane protein MdtQ		K15550	375.63	462.2	5.1e-139	outer membrane protein, multidrug efflux system	XF37_23560	-1.1531	0.0266128		multidrug resistance outer membrane protein MdtQ
KKF84556.1	chemotaxis protein CheZ		K03414	65.33	247.2	9.5e-74	chemotaxis protein CheZ	XF37_06535	-1.15442	0.0269746		chemotaxis protein CheZ
KKF82847.1	sulfite oxidase subunit YedZ		K17247	71.57	216.6	1.7e-64	methionine sulfoxide reductase heme-binding subunit	XF37_15740	-1.15597	7.33074e-05		sulfite oxidase subunit YedZ
KKF84034.1	ssDNA exonuclease RecJ		K07462	63.17	691.6	7e-208	single-stranded-DNA-specific exonuclease [EC:3.1.-.-]	XF37_08345	-1.15808	0.00144609		ssDNA exonuclease RecJ
KKF81582.1	PTS system galactitol-specific transporter subunit IIC	gatC	K02775	362.83	565.2	3.4e-170	galactitol PTS system EIIC component	XF37_21470	-1.15846	0.0393944	gatC	PTS system galactitol-specific transporter subunit IIC
KKF82183.1	multidrug ABC transporter ATP-binding protein		K18890	721.87	760.4	5e-229	ATP-binding cassette, subfamily B, multidrug efflux pump	XF37_18640	-1.15957	0.0016275		multidrug ABC transporter ATP-binding protein
KKF83483.1	lipopolysaccharide transporter		K09774	55.57	141.5	1.2e-41	lipopolysaccharide export system protein LptA	XF37_11395	-1.1607	0.0025492		lipopolysaccharide transporter
KKF80470.1	16S rRNA methyltransferase	rsmC	K00564	112.47	329.3	1.3e-98	16S rRNA (guanine1207-N2)-methyltransferase [EC:2.1.1.172]	XF37_27130	-1.1631	0.0242557	rsmC	16S rRNA methyltransferase
KKF82390.1	CDP-diacylglycerol pyrophosphatase		K01521	49.5	375.9	4.5e-113	CDP-diacylglycerol pyrophosphatase [EC:3.6.1.26]	XF37_17595	-1.16806	0.0409782		CDP-diacylglycerol pyrophosphatase
KKF80698.1	membrane protein	rcsF	K06080	64.4	160.8	5.7e-48	RcsF protein	XF37_28330	-1.16969	0.000907929	rcsF	membrane protein
KKF81247.1	type IV secretion protein Rhs		K11904	73.77	672.5	2.9e-202	type VI secretion system secreted protein VgrG	XF37_23690	-1.17017	0.0200587		type IV secretion protein Rhs
KKF83296.1	peptidase M66		K20952	1634.87	114.1	1.5e-33	rugosity and biofilm structure modulator C	XF37_12980	-1.17217	1.05035e-06		peptidase M66
KKF85131.1	tellurite resistance protein TehB		K16868	94.47	279.3	1.7e-83	tellurite methyltransferase [EC:2.1.1.265]	XF37_02890	-1.17244	0.0115584		tellurite resistance protein TehB
KKF83507.1	phosphate starvation-inducible protein PsiE		K19353	302.67	330.7	5.8e-99	heptose-I-phosphate ethanolaminephosphotransferase [EC:2.7.8.-]	XF37_11530	-1.17279	0.0084471		phosphate starvation-inducible protein PsiE
KKF82930.1	superoxide dismutase		K04564	39.77	308	2.7e-92	superoxide dismutase, Fe-Mn family [EC:1.15.1.1]	XF37_14245	-1.17319	1.9381e-06		superoxide dismutase
KKF84358.1	GntR family transcriptional regulator		K22293	170.5	339	8.2e-102	GntR family transcriptional regulator, rspAB operon transcriptional rep	XF37_07830	-1.17329	0.00476234		GntR family transcriptional regulator
KKF85125.1	GntR family transcriptional regulator		K05825	402.2	331.6	2.7e-99	2-aminoadipate transaminase [EC:2.6.1.-]	XF37_02850	-1.17363	0.00152983		GntR family transcriptional regulator
KKF81613.1	sulfur transfer protein SirA		K04085	45.7	109.8	4.1e-32	tRNA 2-thiouridine synthesizing protein A [EC:2.8.1.-]	XF37_21635	-1.17373	0.00784206		sulfur transfer protein SirA
KKF83220.1	fumarate hydratase		K01676	388.07	893.5	6.6e-269	fumarate hydratase, class I [EC:4.2.1.2]	XF37_13305	-1.17481	0.0434377		fumarate hydratase
KKF83245.1	phospho-2-dehydro-3-deoxyheptonate aldolase		K01626	35.8	299.7	1.8e-89	3-deoxy-7-phosphoheptulonate synthase [EC:2.5.1.54]	XF37_13470	-1.17677	2.48354e-05		phospho-2-dehydro-3-deoxyheptonate aldolase
KKF81294.1	ribonucleotide-diphosphate reductase subunit alpha		K00525	115.1	401.5	2.3e-120	ribonucleoside-diphosphate reductase alpha chain [EC:1.17.4.1]	XF37_23050	-1.17763	8.00293e-06		ribonucleotide-diphosphate reductase subunit alpha
KKF80398.1	helicase		K03580	298.23	241.7	6e-72	ATP-dependent helicase HepA [EC:3.6.4.-]	XF37_26720	-1.17769	0.0154593		helicase
KKF80813.1	glycosyl transferase		K23160	639.5	688.7	5e-208	GlcNAc transferase	XF37_26165	-1.18019	0.000165543		glycosyl transferase
KKF81233.1	transporter		K03321	358.7	463.8	3.2e-139	sulfate permease, SulP family	XF37_24020	-1.18205	0.00806312		transporter
KKF81058.1	GTPase RsgA		K06949	101.8	373	6.6e-112	ribosome biogenesis GTPase / thiamine phosphate phosphatase [EC:3.6.1.-	XF37_25250	-1.18246	0.000100543		GTPase RsgA
KKF81699.1	cell division protein DamX		K03112	154.97	263.4	1.9e-78	DamX protein	XF37_22085	-1.18254	0.000254496		cell division protein DamX
KKF85363.1	rRNA methylase		K03216	96.7	260.5	2.8e-78	tRNA (cytidine/uridine-2'-O-)-methyltransferase [EC:2.1.1.207]	XF37_02100	-1.18406	0.0022797		rRNA methylase
KKF82006.1	lipid transporter ATP-binding/permease		K11085	706.8	817.1	4.5e-246	ATP-binding cassette, subfamily B, bacterial MsbA [EC:3.6.3.-]	XF37_19325	-1.18474	0.000204611		lipid transporter ATP-binding/permease
KKF80512.1	transaldolase		K00616	149.13	419.9	4.4e-126	transaldolase [EC:2.2.1.2]	XF37_27360	-1.18562	1.97329e-06		transaldolase
KKF83734.1	signal peptidase I		K03100	112.17	222.1	3.3e-66	signal peptidase I [EC:3.4.21.89]	XF37_09835	-1.18676	2.49691e-06		signal peptidase I
KKF83599.1	beta-D-galactosidase	ebgA	K12111	1258.47	1720.5	0	evolved beta-galactosidase subunit alpha [EC:3.2.1.23]	XF37_12020	-1.18996	0.0467952	ebgA	beta-D-galactosidase
KKF83794.1	membrane biogenesis protein		K17713	153.93	259.2	3e-77	outer membrane protein assembly factor BamB	XF37_10145	-1.19402	2.11248e-06		membrane biogenesis protein
KKF81175.1	ABC transporter ATP-binding protein		K02016	93.4	109	8.1e-32	iron complex transport system substrate-binding protein	XF37_23965	-1.19511	0.0113619		ABC transporter ATP-binding protein
KKF80838.1	peptidylprolyl isomerase		K03767	222.47	212.1	3.7e-63	peptidyl-prolyl cis-trans isomerase A (cyclophilin A) [EC:5.2.1.8]	XF37_26055	-1.19544	6.68702e-07		peptidylprolyl isomerase
KKF85071.1	heptose kinase		K08296	74.2	26	1.2e-06	phosphohistidine phosphatase [EC:3.1.3.-]	XF37_04265	-1.1974	0.00101482		heptose kinase
KKF84058.1	xanthine dehydrogenase		K00087	858.27	1138.4	0	xanthine dehydrogenase molybdenum-binding subunit [EC:1.17.1.4]	XF37_08480	-1.19776	0.0452626		xanthine dehydrogenase
KKF85195.1	LacI family transcriptional regulator		K03604	449.57	266.7	1.1e-79	LacI family transcriptional regulator, purine nucleotide synthesis repr	XF37_03235	-1.19847	0.0188012		LacI family transcriptional regulator
KKF82206.1	membrane protein		K08153	320.9	188	8.8e-56	MFS transporter, DHA1 family, multidrug resistance protein	XF37_18755	-1.20286	0.00540243		membrane protein
KKF85653.1	secretion protein EspD		K15345	124.97	74.4	2.3e-21	secreted effector protein SseC	XF37_00040	-1.20478	0.016422		secretion protein EspD
KKF83602.1	aerotaxis receptor Aer		K03776	388.8	614.1	1e-184	aerotaxis receptor	XF37_12040	-1.20722	0.0288987		aerotaxis receptor Aer
KKF85374.1	2-amino-3-ketobutyrate CoA ligase		K00639	503.8	773.2	8.2e-233	glycine C-acetyltransferase [EC:2.3.1.29]	XF37_02155	-1.20726	2.6678e-06		2-amino-3-ketobutyrate CoA ligase
KKF81303.1	histidine kinase		K07677	687.33	1189.4	0	two-component system, NarL family, capsular synthesis sensor histidine	XF37_23100	-1.20849	1.33268e-05		histidine kinase
KKF81702.1	phosphoglycolate phosphatase		K01091	116.3	207.8	8.5e-62	phosphoglycolate phosphatase [EC:3.1.3.18]	XF37_22100	-1.21188	0.0030609		phosphoglycolate phosphatase
KKF85729.1	DNA gyrase subunit B	gyrB	K02470	968.8	1116.6	0	DNA gyrase subunit B [EC:5.6.2.2]	XF37_00465	-1.2127	2.2704e-06	gyrB	DNA gyrase subunit B
KKF85042.1	NADH:ubiquinone oxidoreductase		K13378	598	865.3	5e-261	NADH-quinone oxidoreductase subunit C/D [EC:7.1.1.2]	XF37_04110	-1.21432	1.81226e-07		NADH:ubiquinone oxidoreductase
KKF81863.1	transcriptional regulator		K04333	222.97	306.7	3.1e-92	LuxR family transcriptional regulator, csgAB operon transcriptional reg	XF37_20950	-1.21505	0.0111913		transcriptional regulator
KKF83434.1	acetyl-CoA carboxylase		K01961	742.5	823.6	4e-248	acetyl-CoA carboxylase, biotin carboxylase subunit [EC:6.4.1.2 6.3.4.14	XF37_11135	-1.21514	9.25422e-06		acetyl-CoA carboxylase
KKF80678.1	outer membrane protein assembly protein YaeT		K07277	293.23	661.3	1.1e-198	outer membrane protein insertion porin family	XF37_28230	-1.22021	2.82665e-08		outer membrane protein assembly protein YaeT
KKF84334.1	hypothetical protein		K08994	67.57	277.9	4.4e-83	ion channel-forming bestrophin family protein	XF37_07705	-1.22049	0.00614297		hypothetical protein
KKF83442.1	rod shape-determining protein MreB		K03569	105.47	595.8	1.7e-179	rod shape-determining protein MreB and related proteins	XF37_11175	-1.22122	6.50059e-06		rod shape-determining protein MreB
KKF81136.1	pantothenate kinase		K00867	144.83	505.4	2.2e-152	type I pantothenate kinase [EC:2.7.1.33]	XF37_24445	-1.22155	1.84979e-05		pantothenate kinase
KKF82864.1	dimethyl sulfoxide reductase		K07309	1542.7	1721.9	0	Tat-targeted selenate reductase subunit YnfE [EC:1.97.1.9]	XF37_13885	-1.22255	0.00383144		dimethyl sulfoxide reductase
KKF81581.1	carbohydrate kinase		K00879	406.3	225.9	2.2e-67	L-fuculokinase [EC:2.7.1.51]	XF37_21465	-1.22441	0.000855398		carbohydrate kinase
KKF80406.1	9-O-acetyl-N-acetylneuraminic acid deacetylase		K22111	733	727.6	4.9e-220	9-O-acetyl-N-acetylneuraminic acid deacetylase	XF37_26760	-1.22759	0.0341988		9-O-acetyl-N-acetylneuraminic acid deacetylase
KKF83040.1	protease 4		K04773	190.9	456.7	4.1e-137	protease IV [EC:3.4.21.-]	XF37_14830	-1.2285	0.0029714		protease 4
KKF83406.1	glycyl-tRNA synthetase		K01878	484.7	624.9	2.8e-188	glycyl-tRNA synthetase alpha chain [EC:6.1.1.14]	XF37_12660	-1.2288	6.64177e-05		glycyl-tRNA synthetase
KKF83217.1	succinyl-CoA synthetase subunit alpha		K01902	343	509.9	1.1e-153	succinyl-CoA synthetase alpha subunit [EC:6.2.1.5]	XF37_13290	-1.22986	3.34898e-06		succinyl-CoA synthetase subunit alpha
KKF83394.1	alpha-amylase	malS	K01176	255.07	302.7	1.8e-90	alpha-amylase [EC:3.2.1.1]	XF37_12600	-1.23015	0.0001708	malS	alpha-amylase
KKF81257.1	type VI secretion system protein ImpI		K11894	299.7	382.7	9e-115	type VI secretion system protein ImpI	XF37_23740	-1.23067	0.00212041		type VI secretion system protein ImpI
KKF81044.1	elongation factor P		K02356	89.93	316.7	2.5e-95	elongation factor P	XF37_25180	-1.23069	0.000107436		elongation factor P
KKF84609.1	hypothetical protein		K18588	33.8	135.4	9.5e-40	coenzyme Q-binding protein COQ10	XF37_06410	-1.23589	0.00117975		hypothetical protein
KKF83116.1	membrane protein		K07245	167.63	198.8	5e-59	copper resistance protein D	XF37_15235	-1.24157	0.00438069		membrane protein
KKF84226.1	transcriptional regulator		K02466	73	165.6	1.9e-49	glucitol operon activator protein	XF37_09420	-1.2416	0.00561321		transcriptional regulator
KKF81536.1	transcriptional regulator		K21905	357.2	518.7	7e-157	AraC family transcriptional regulator, glutamate-dependent acid resista	XF37_21220	-1.24285	1.48315e-05		transcriptional regulator
KKF82911.1	peptide ABC transporter permease	tppB	K03305	307.53	449.1	7.6e-135	proton-dependent oligopeptide transporter, POT family	XF37_14135	-1.24647	0.00203827	tppB	peptide ABC transporter permease
KKF81227.1	intracellular septation protein A		K06190	45.3	286.9	4.1e-86	intracellular septation protein	XF37_24265	-1.24902	0.00116003		intracellular septation protein A
KKF84834.1	glutamate--tRNA ligase		K01886	595.67	985.8	6.2e-297	glutaminyl-tRNA synthetase [EC:6.1.1.18]	XF37_04630	-1.25037	0.000116308		glutamate--tRNA ligase
KKF82077.1	transporter		K07085	261.5	609.9	1.3e-183	putative transport protein	XF37_19690	-1.25221	0.00457536		transporter
KKF85592.1	UDP-N-acetyl-D-mannosamine dehydrogenase	wecC	K02472	459.83	618.9	1.7e-186	UDP-N-acetyl-D-mannosaminuronic acid dehydrogenase [EC:1.1.1.336]	XF37_01270	-1.25228	0.000335111	wecC	UDP-N-acetyl-D-mannosamine dehydrogenase
KKF83081.1	hypothetical protein		K14742	84.63	229.7	1.7e-68	tRNA threonylcarbamoyladenosine biosynthesis protein TsaB	XF37_15045	-1.25339	0.00147807		hypothetical protein
KKF83378.1	selenocysteine synthase		K01042	252.27	648.8	2.5e-195	L-seryl-tRNA(Ser) seleniumtransferase [EC:2.9.1.1]	XF37_12520	-1.25617	0.000153389		selenocysteine synthase
KKF85373.1	L-threonine 3-dehydrogenase	tdh	K00060	324.23	599.4	4.8e-181	threonine 3-dehydrogenase [EC:1.1.1.103]	XF37_02150	-1.2572	0.00366242	tdh	L-threonine 3-dehydrogenase
KKF84782.1	PTS mannose transporter subunit IIC		K02814	444.7	502.5	6.9e-152	sorbose PTS system EIIC component	XF37_05505	-1.25768	0.00871454		PTS mannose transporter subunit IIC
KKF84752.1	damage-inducible protein		K03327	113.37	156.3	3.3e-46	multidrug resistance protein, MATE family	XF37_05355	-1.25972	0.0011313		damage-inducible protein
KKF83142.1	aspartyl-tRNA synthetase		K01876	316.9	831.9	1.5e-250	aspartyl-tRNA synthetase [EC:6.1.1.12]	XF37_15375	-1.26053	3.68996e-06		aspartyl-tRNA synthetase
KKF81020.1	transcriptional regulator		K07703	333.3	444.6	2.1e-134	two-component system, CitB family, response regulator DcuR	XF37_25050	-1.26388	0.000810887		transcriptional regulator
KKF81664.1	transcriptional regulator		K02444	263.5	417.1	1.4e-125	DeoR family transcriptional regulator, glycerol-3-phosphate regulon rep	XF37_21900	-1.26452	0.0208641		transcriptional regulator
KKF80850.1	membrane protein		K11739	164.73	1379.9	0	bacteriophage N4 adsorption protein A	XF37_26125	-1.26577	0.0035098		membrane protein
KKF85136.1	glucan biosynthesis protein D	mdoD	K03670	301.63	628.2	6.9e-189	periplasmic glucans biosynthesis protein	XF37_02920	-1.26584	4.30332e-05	mdoD	glucan biosynthesis protein D
KKF85043.1	NADH dehydrogenase		K00334	158.03	207.8	1e-61	NADH-quinone oxidoreductase subunit E [EC:7.1.1.2]	XF37_04115	-1.266	7.70132e-07		NADH dehydrogenase
KKF80670.1	30S ribosomal protein S2		K02967	142.17	408.2	9.3e-123	small subunit ribosomal protein S2	XF37_28190	-1.2661	5.10093e-07		30S ribosomal protein S2
KKF81298.1	DNA gyrase subunit A		K02469	1038.4	1464.8	0	DNA gyrase subunit A [EC:5.6.2.2]	XF37_23070	-1.26953	8.60843e-07		DNA gyrase subunit A
KKF82738.1	NAD-dependent malic enzyme		K00029	320.57	694.4	4.6e-209	malate dehydrogenase (oxaloacetate-decarboxylating)(NADP+) [EC:1.1.1.40	XF37_16005	-1.27042	1.68443e-06		NAD-dependent malic enzyme
KKF83466.1	N-acetylneuraminate lyase		K01639	245.17	284.3	3.7e-85	N-acetylneuraminate lyase [EC:4.1.3.3]	XF37_11300	-1.27083	0.00307242		N-acetylneuraminate lyase
KKF84557.1	chemotaxis protein CheY		K03413	140.33	181.3	8.3e-54	two-component system, chemotaxis family, chemotaxis protein CheY	XF37_06540	-1.27132	0.00457328		chemotaxis protein CheY
KKF82184.1	multidrug ABC transporter ATP-binding protein		K18889	666.1	848.8	8.1e-256	ATP-binding cassette, subfamily B, multidrug efflux pump	XF37_18645	-1.27265	0.0140203		multidrug ABC transporter ATP-binding protein
KKF83429.1	Fis family transcriptional regulator	fis	K03557	96.63	136.2	2.9e-40	Fis family transcriptional regulator, factor for inversion stimulation	XF37_11110	-1.27402	0.0141078	fis	Fis family transcriptional regulator
KKF82973.1	phosphoenolpyruvate synthase		K01007	387.33	1100.4	0	pyruvate, water dikinase [EC:2.7.9.2]	XF37_14485	-1.27438	2.19061e-07		phosphoenolpyruvate synthase
KKF85616.1	ATP-dependent DNA helicase RecQ		K03654	611.9	752.8	1.6e-226	ATP-dependent DNA helicase RecQ [EC:3.6.4.12]	XF37_01075	-1.27547	0.00183403		ATP-dependent DNA helicase RecQ
KKF81973.1	paraquat-inducible protein B		K06192	145.87	618.5	4.8e-186	paraquat-inducible protein B	XF37_19135	-1.27641	0.000282031		paraquat-inducible protein B
KKF82236.1	proline-specific permease	proY	K11736	727.47	816.2	1.9e-246	proline-specific permease ProY	XF37_18905	-1.27655	0.00256893	proY	proline-specific permease
KKF83497.1	membrane protein		K03298	161.57	86	7.7e-25	drug/metabolite transporter, DME family	XF37_11475	-1.27676	0.00120738		membrane protein
KKF81031.1	transcriptional regulator		K03765	147.73	618.5	4.8e-186	transcriptional activator of cad operon	XF37_25105	-1.27797	0.00098182		transcriptional regulator
KKF81329.1	transcriptional regulator NarP		K07685	261.43	335.2	3.6e-101	two-component system, NarL family, nitrate/nitrite response regulator N	XF37_23240	-1.27798	0.000175926		transcriptional regulator NarP
KKF85459.1	peroxidase		K03782	417.33	1073.5	0	catalase-peroxidase [EC:1.11.1.21]	XF37_01805	-1.27836	2.76574e-05		peroxidase
KKF84928.1	copper transporter		K07796	501.63	813.2	1.7e-245	outer membrane protein, copper/silver efflux system	XF37_05170	-1.2829	0.028801		copper transporter
KKF81747.1	shikimate kinase	aroK	K00891	132.9	211.6	5.7e-63	shikimate kinase [EC:2.7.1.71]	XF37_22075	-1.2831	2.74214e-05	aroK	shikimate kinase
KKF80772.1	23S rRNA pseudouridylate synthase		K06181	199.23	346.3	3.8e-104	23S rRNA pseudouridine2457 synthase [EC:5.4.99.20]	XF37_26220	-1.28346	0.00029834		23S rRNA pseudouridylate synthase
KKF83196.1	deoxyribodipyrimidine photolyase		K01669	386.73	489.8	5.1e-147	deoxyribodipyrimidine photo-lyase [EC:4.1.99.3]	XF37_13180	-1.28354	0.000282031		deoxyribodipyrimidine photolyase
KKF80686.1	acetyl-CoA carboxylase subunit alpha		K01962	403.47	526.9	1.4e-158	acetyl-CoA carboxylase carboxyl transferase subunit alpha [EC:6.4.1.2 2	XF37_28270	-1.28362	5.21575e-06		acetyl-CoA carboxylase subunit alpha
KKF84240.1	multidrug resistance protein B	emrB	K03446	345.43	673.5	6.3e-203	MFS transporter, DHA2 family, multidrug resistance protein	XF37_09530	-1.2857	0.0170023	emrB	multidrug resistance protein B
KKF84845.1	magnesium/cobalt efflux protein CorC		K06189	311.53	442.1	6e-133	magnesium and cobalt transporter	XF37_04720	-1.28639	0.000105227		magnesium/cobalt efflux protein CorC
KKF83045.1	oxidoreductase		K18471	375.03	479.3	1.8e-144	methylglyoxal reductase [EC:1.1.1.-]	XF37_14860	-1.28744	0.00546115		oxidoreductase
KKF82106.1	L,D-transpeptidase		K19235	477.6	546.8	6.9e-165	L,D-transpeptidase YbiS	XF37_19845	-1.28811	1.6973e-06		L,D-transpeptidase
KKF82103.1	sugar phosphatase		K07757	391.23	468.9	1.4e-141	sugar-phosphatase [EC:3.1.3.23]	XF37_19830	-1.28899	0.00690211		sugar phosphatase
KKF81812.1	malonyl CoA-ACP transacylase		K00645	275.43	449.9	5.3e-135	[acyl-carrier-protein] S-malonyltransferase [EC:2.3.1.39]	XF37_20680	-1.29105	1.12021e-06		malonyl CoA-ACP transacylase
KKF84127.1	cysteine sulfinate desulfinase		K01766	553.97	665.8	6.2e-201	cysteine sulfinate desulfinase [EC:4.4.1.-]	XF37_08875	-1.29191	0.000714871		cysteine sulfinate desulfinase
KKF85539.1	FMN reductase	fre	K05368	269	387.3	6.1e-117	NAD(P)H-flavin reductase [EC:1.5.1.41]	XF37_00975	-1.2924	0.000497575	fre	FMN reductase
KKF85168.1	tRNA 2-thiocytidine biosynthesis protein TtcA		K14058	179.97	541.5	3.7e-163	tRNA 2-thiocytidine biosynthesis protein TtcA	XF37_03085	-1.29614	0.000398611		tRNA 2-thiocytidine biosynthesis protein TtcA
KKF84464.1	cold-shock protein		K03704	85.93	56	1.8e-15	cold shock protein	XF37_06765	-1.2986	0.000163706		cold-shock protein
KKF84309.1	zinc protease		K07263	264.8	344	8.9e-103	zinc protease [EC:3.4.24.-]	XF37_07570	-1.29902	0.000325162		zinc protease
KKF82231.1	queuine tRNA-ribosyltransferase	tgt	K00773	263.5	624.3	5.7e-188	queuine tRNA-ribosyltransferase [EC:2.4.2.29]	XF37_18880	-1.29944	1.90628e-05	tgt	queuine tRNA-ribosyltransferase
KKF83972.1	nucleoside-triphosphate diphosphatase		K02428	131.4	243.1	1.2e-72	XTP/dITP diphosphohydrolase [EC:3.6.1.66]	XF37_08015	-1.3007	0.0248551		nucleoside-triphosphate diphosphatase
KKF84999.1	murein endopeptidase	mepA	K07261	44.27	347.7	2.3e-104	penicillin-insensitive murein DD-endopeptidase [EC:3.4.24.-]	XF37_03895	-1.30192	0.0054469	mepA	murein endopeptidase
KKF81820.1	ribonuclease E	rne	K08300	634.2	968.1	1.6e-291	ribonuclease E [EC:3.1.26.12]	XF37_20720	-1.30951	8.85141e-07	rne	ribonuclease E
KKF80697.1	tRNA (adenine(37)-N6)-methyltransferase		K22900	85.8	286.5	1.1e-85	tRNA (adenine37-N6)-methyltransferase [EC:2.1.1.-]	XF37_28325	-1.30994	0.000171594		tRNA (adenine(37)-N6)-methyltransferase
KKF81148.1	(p)ppGpp synthetase		K01139	804.7	974.8	9.7e-294	GTP diphosphokinase / guanosine-3',5'-bis(diphosphate) 3'-diphosphatase	XF37_24385	-1.31146	2.12772e-06		(p)ppGpp synthetase
KKF85041.1	NADH dehydrogenase		K00331	278	308.3	2.7e-92	NADH-quinone oxidoreductase subunit B [EC:7.1.1.2]	XF37_04105	-1.31179	3.34154e-06		NADH dehydrogenase
KKF82618.1	colanic acid biosynthesis protein	wcaM	K16711	772.73	886.9	7.2e-268	colanic acid biosynthesis protein WcaM	XF37_17165	-1.31191	0.00868611	wcaM	colanic acid biosynthesis protein
KKF85005.1	transporter		K08153	320.9	134.5	1.4e-39	MFS transporter, DHA1 family, multidrug resistance protein	XF37_03925	-1.31248	0.036183		transporter
KKF80415.1	fimbrial protein		K07354	1523.57	1055.6	0	outer membrane usher protein	XF37_26815	-1.31268	0.0134149		fimbrial protein
KKF84455.1	cytochrome d ubiquinol oxidase subunit 2		K00426	38.1	374.5	2.1e-112	cytochrome bd ubiquinol oxidase subunit II [EC:7.1.1.7]	XF37_06715	-1.31376	0.0299133		cytochrome d ubiquinol oxidase subunit 2
KKF81214.1	thymidine kinase		K00857	59.13	203.5	2.1e-60	thymidine kinase [EC:2.7.1.21]	XF37_24190	-1.31385	0.00144914		thymidine kinase
KKF80503.1	RNA methyltransferase		K02533	315.73	253.9	7.5e-76	tRNA/rRNA methyltransferase [EC:2.1.1.-]	XF37_27310	-1.31448	0.00149381		RNA methyltransferase
KKF80497.1	hypothetical protein		K05805	21	250.2	3.8e-75	CreA protein	XF37_27280	-1.32342	0.00123779		hypothetical protein
KKF83752.1	serine hydroxymethyltransferase		K00600	80.93	691.3	3.9e-208	glycine hydroxymethyltransferase [EC:2.1.2.1]	XF37_09930	-1.32567	1.76681e-08		serine hydroxymethyltransferase
KKF83681.1	hydrogenase nickel incorporation protein	hypA	K04651	38.63	144	9.9e-43	hydrogenase nickel incorporation protein HypA/HybF	XF37_12450	-1.32755	0.00203558	hypA	hydrogenase nickel incorporation protein
KKF83435.1	acetyl-CoA carboxylase		K02160	93.2	205.3	2.8e-61	acetyl-CoA carboxylase biotin carboxyl carrier protein	XF37_11140	-1.32835	0.000674052		acetyl-CoA carboxylase
KKF81975.1	ABC transporter ATPase		K15738	630.77	831.4	2.1e-250	ABC transport system ATP-binding/permease protein	XF37_19145	-1.32912	0.00337783		ABC transporter ATPase
KKF84661.1	multidrug transporter		K18141	581.1	569.1	1.3e-171	membrane fusion protein, multidrug efflux system	XF37_06210	-1.33003	3.2082e-06		multidrug transporter
KKF85337.1	multidrug transporter		K03297	98.1	107.7	2e-31	small multidrug resistance pump	XF37_02440	-1.33111	0.00107849		multidrug transporter
KKF83911.1	inorganic pyrophosphatase		K01507	19.8	165.9	4.5e-49	inorganic pyrophosphatase [EC:3.6.1.1]	XF37_10780	-1.33301	2.76574e-05		inorganic pyrophosphatase
KKF83376.1	hypothetical protein		K07497	13.5	101	3.6e-29	putative transposase	XF37_12725	-1.33538	0.00189222		hypothetical protein
KKF85731.1	DNA polymerase III subunit beta		K02338	53.4	389.6	6.6e-117	DNA polymerase III subunit beta [EC:2.7.7.7]	XF37_00475	-1.33539	2.70552e-05		DNA polymerase III subunit beta
KKF82493.1	two-component response-regulatory protein YehT		K02477	204.17	239.2	2e-71	two-component system, LytTR family, response regulator	XF37_16515	-1.33616	0.00230558		two-component response-regulatory protein YehT
KKF82228.1	preprotein translocase subunit SecF		K03074	325.57	379.8	3.5e-114	preprotein translocase subunit SecF	XF37_18865	-1.33699	0.000142124		preprotein translocase subunit SecF
KKF82921.1	fusaric acid resistance protein		K03468	239.57	186.3	3.2e-55	p-hydroxybenzoic acid efflux pump subunit AaeB	XF37_14190	-1.33709	0.00339228		fusaric acid resistance protein
KKF85472.1	methionyl-tRNA formyltransferase	fmt	K00604	263.1	390.2	4.6e-117	methionyl-tRNA formyltransferase [EC:2.1.2.9]	XF37_01600	-1.33786	0.000993966	fmt	methionyl-tRNA formyltransferase
KKF85594.1	lipopolysaccharide biosynthesis protein WzzE		K05790	206.6	543.3	6.2e-164	lipopolysaccharide biosynthesis protein WzzE	XF37_01280	-1.33808	0.000223733		lipopolysaccharide biosynthesis protein WzzE
KKF80450.1	DEAD/DEAH box helicase		K01153	157.8	446.8	8.5e-134	type I restriction enzyme, R subunit [EC:3.1.21.3]	XF37_27010	-1.33833	0.000116984		DEAD/DEAH box helicase
KKF81600.1	4-hydroxybenzoyl-CoA thioesterase		K07107	74.63	99.9	5.5e-29	acyl-CoA thioester hydrolase [EC:3.1.2.-]	XF37_21560	-1.33859	0.00101995		4-hydroxybenzoyl-CoA thioesterase
KKF84093.1	transporter		K03837	529.97	398.2	1.1e-119	serine transporter	XF37_08690	-1.33885	0.00126909		transporter
KKF84558.1	chemotaxis protein		K03412	199.63	476.5	3.6e-143	two-component system, chemotaxis family, protein-glutamate methylestera	XF37_06545	-1.33966	0.00383728		chemotaxis protein
KKF82322.1	hypothetical protein		K09912	101.13	263.4	5.7e-79	uncharacterized protein	XF37_18450	-1.3424	0.0475598		hypothetical protein
KKF82344.1	D-alanine--D-alanine ligase		K01921	239.8	438.3	1.8e-131	D-alanine-D-alanine ligase [EC:6.3.2.4]	XF37_18570	-1.3429	1.17106e-05		D-alanine--D-alanine ligase
KKF82634.1	UDP-glucose 6-dehydrogenase		K00012	356.37	395.5	1.9e-118	UDPglucose 6-dehydrogenase [EC:1.1.1.22]	XF37_17250	-1.344	0.00104559		UDP-glucose 6-dehydrogenase
KKF80827.1	glycerate kinase		K00865	67.67	526.6	1.7e-158	glycerate 2-kinase [EC:2.7.1.165]	XF37_26000	-1.34447	0.0201022		glycerate kinase
KKF81036.1	C4-dicarboxylate transporter		K07791	586.4	644.1	2.9e-194	anaerobic C4-dicarboxylate transporter DcuA	XF37_25135	-1.34474	4.26864e-05		C4-dicarboxylate transporter
KKF81069.1	membrane protein		K09937	36.53	95.9	2.9e-28	uncharacterized protein	XF37_25325	-1.34555	0.0239551		membrane protein
KKF85391.1	50S ribosomal protein L28	rpmB	K02902	30.57	101.9	1.5e-29	large subunit ribosomal protein L28	XF37_02240	-1.34595	2.69791e-05	rpmB	50S ribosomal protein L28
KKF82002.1	3-deoxy-manno-octulosonate cytidylyltransferase		K00979	176.57	406.2	5.2e-122	3-deoxy-manno-octulosonate cytidylyltransferase (CMP-KDO synthetase) [E	XF37_19305	-1.3461	0.000797243		3-deoxy-manno-octulosonate cytidylyltransferase
KKF80773.1	phosphatase		K12152	95.23	240.1	2.6e-72	phosphatase NudJ [EC:3.6.1.-]	XF37_26225	-1.34958	0.0013386		phosphatase
KKF81618.1	16S rRNA methyltransferase	rsmD	K08316	92.8	262.7	1.2e-78	16S rRNA (guanine966-N2)-methyltransferase [EC:2.1.1.171]	XF37_21660	-1.35194	0.000530028	rsmD	16S rRNA methyltransferase
KKF80416.1	fimbrial protein		K07348	182.57	247.3	1.6e-74	minor fimbrial subunit	XF37_26820	-1.35386	0.0339239		fimbrial protein
KKF81146.1	ATP-dependent DNA helicase RecG		K03655	393.73	749.9	1.9e-225	ATP-dependent DNA helicase RecG [EC:3.6.4.12]	XF37_24375	-1.35427	0.00072793		ATP-dependent DNA helicase RecG
KKF81094.1	30S ribosomal protein S18	rpsR	K02963	72.23	100.7	3e-29	small subunit ribosomal protein S18	XF37_25455	-1.35546	0.00432716	rpsR	30S ribosomal protein S18
KKF85384.1	heptose kinase		K02848	125.67	406.3	2e-122	heptose I phosphotransferase [EC:2.7.1.-]	XF37_02205	-1.35724	0.00163661		heptose kinase
KKF80798.1	putrescine/spermidine ABC transporter ATPase	potA	K11072	506.87	583.2	1.8e-175	spermidine/putrescine transport system ATP-binding protein [EC:7.6.2.11	XF37_26360	-1.3577	0.0174728	potA	putrescine/spermidine ABC transporter ATPase
KKF80561.1	Dna-J like membrane chaperone protein	djlA	K05801	93.67	341.1	2e-102	DnaJ like chaperone protein	XF37_27625	-1.35833	0.000809019	djlA	Dna-J like membrane chaperone protein
KKF83592.1	mRNA interferase HigB		K19166	37.57	99.8	5.5e-29	mRNA interferase HigB [EC:3.1.-.-]	XF37_11985	-1.35927	0.00241086		mRNA interferase HigB
KKF80958.1	membrane protein		K21090	347.47	368.4	1.9e-110	c-di-GMP phosphodiesterase [EC:3.1.4.52]	XF37_24710	-1.35944	0.00843509		membrane protein
KKF82064.1	23S rRNA methyltransferase	rumB	K03212	316.6	596.1	8e-180	23S rRNA (uracil747-C5)-methyltransferase [EC:2.1.1.189]	XF37_19625	-1.36042	0.0274687	rumB	23S rRNA methyltransferase
KKF85187.1	dienelactone hydrolase		K06889	111.77	79.9	6.1e-23	uncharacterized protein	XF37_03190	-1.36232	0.00372785		dienelactone hydrolase
KKF82610.1	GDP-mannose mannosyl hydrolase		K03207	113.5	240.6	2e-72	colanic acid biosynthesis protein WcaH [EC:3.6.1.-]	XF37_17125	-1.36408	0.00260811		GDP-mannose mannosyl hydrolase
KKF82979.1	cyclic di-GMP regulator CdgR		K21086	116.23	110.5	2.3e-32	c-di-GMP phosphodiesterase [EC:3.1.4.52]	XF37_14515	-1.36527	4.37448e-05		cyclic di-GMP regulator CdgR
KKF80652.1	bifunctional glycosyl transferase/transpeptidase	mrcB	K05365	646.8	1143.4	0	penicillin-binding protein 1B [EC:2.4.1.129 3.4.16.4]	XF37_28100	-1.36655	2.77537e-06	mrcB	bifunctional glycosyl transferase/transpeptidase
KKF85497.1	50S ribosomal protein L29		K02904	54.57	81.8	1.4e-23	large subunit ribosomal protein L29	XF37_01725	-1.36728	3.59164e-05		50S ribosomal protein L29
KKF80619.1	dihydrolipoamide dehydrogenase		K00382	465.93	679.5	1.2e-204	dihydrolipoamide dehydrogenase [EC:1.8.1.4]	XF37_27930	-1.36899	1.49158e-07		dihydrolipoamide dehydrogenase
KKF80710.1	hypothetical protein		K22475	115.67	34.6	5.5e-09	alcohol dehydrogenase (quinone) subunit AdhS	XF37_27075	-1.36997	0.00240666		hypothetical protein
KKF81789.1	outer membrane-specific lipoprotein transporter subunit LolC		K09808	207.63	413	5.4e-124	lipoprotein-releasing system permease protein	XF37_20560	-1.37303	2.97974e-05		outer membrane-specific lipoprotein transporter subunit LolC
KKF84599.1	hypothetical protein		K09801	46.53	144.2	1.6e-42	uncharacterized protein	XF37_06405	-1.37456	0.000153133		hypothetical protein
KKF82257.1	recombination associated protein		K03554	86.5	495.3	5.4e-149	recombination associated protein RdgC	XF37_18945	-1.37601	0.000217159		recombination associated protein
KKF81043.1	hypothetical protein		K19810	379.47	545.7	8.8e-165	L-lysine 2,3-aminomutase [EC:5.4.3.-]	XF37_25175	-1.37927	0.000191232		hypothetical protein
KKF83925.1	magnesium ABC transporter ATPase		K01531	691.57	1363.8	0	P-type Mg2+ transporter [EC:7.2.2.14]	XF37_10855	-1.38201	0.000382893		magnesium ABC transporter ATPase
KKF84473.1	chaperone protein TorD	torD	K03533	128	230.2	6.3e-69	TorA specific chaperone	XF37_06810	-1.38249	0.0196185	torD	chaperone protein TorD
KKF83484.1	lipopolysaccharide transporter		K11719	52.97	135.9	5.9e-40	lipopolysaccharide export system protein LptC	XF37_11400	-1.38313	9.82814e-05		lipopolysaccharide transporter
KKF80950.1	alanine racemase	alr	K01775	122.63	424.5	1.3e-127	alanine racemase [EC:5.1.1.1]	XF37_24665	-1.38337	0.0106191	alr	alanine racemase
KKF83841.1	GDP-mannose pyrophosphatase		K12945	196.27	332.9	1.3e-100	GDP-mannose pyrophosphatase NudK [EC:3.6.1.-]	XF37_10390	-1.38442	1.05434e-05		GDP-mannose pyrophosphatase
KKF81867.1	molecular chaperone		K23349	91.83	103.9	3.9e-30	putative dimethyl sulfoxide reductase chaperone	XF37_20975	-1.3865	0.00222096		molecular chaperone
KKF81599.1	membrane protein		K03634	49.03	60.7	4.9e-17	outer membrane lipoprotein carrier protein	XF37_21555	-1.38706	0.0104115		membrane protein
KKF84755.1	glycerol-3-phosphate acyltransferase		K00631	422.8	1116	0	glycerol-3-phosphate O-acyltransferase [EC:2.3.1.15]	XF37_05370	-1.38711	1.103e-05		glycerol-3-phosphate acyltransferase
KKF80975.1	formate dehydrogenase		K22015	863.73	1027.5	0	formate dehydrogenase (acceptor) [EC:1.17.99.7]	XF37_24800	-1.38893	0.00566018		formate dehydrogenase
KKF83216.1	succinyl-CoA synthetase subunit beta	sucC	K01903	493.67	590	6.9e-178	succinyl-CoA synthetase beta subunit [EC:6.2.1.5]	XF37_13285	-1.39216	3.15574e-06	sucC	succinyl-CoA synthetase subunit beta
KKF85730.1	recombination protein F	recF	K03629	117.1	356	8.1e-107	DNA replication and repair protein RecF	XF37_00470	-1.39355	3.05305e-06	recF	recombination protein F
KKF84336.1	diguanylate cyclase		K18967	243.67	196.4	3.3e-58	diguanylate cyclase [EC:2.7.7.65]	XF37_07720	-1.39422	5.79052e-05		diguanylate cyclase
KKF81185.1	kinase		K00919	115.5	321.4	2.6e-96	4-diphosphocytidyl-2-C-methyl-D-erythritol kinase [EC:2.7.1.148]	XF37_24030	-1.39488	5.09038e-06		kinase
KKF85570.1	flavin mononucleotide phosphatase		K20862	183.27	266.5	1.2e-79	FMN hydrolase / 5-amino-6-(5-phospho-D-ribitylamino)uracil phosphatase	XF37_01140	-1.39925	0.00062579		flavin mononucleotide phosphatase
KKF85696.1	sugar phosphate antiporter	uhpT	K07784	512.43	783.8	1.5e-236	MFS transporter, OPA family, hexose phosphate transport protein UhpT	XF37_00285	-1.40022	0.0079817	uhpT	sugar phosphate antiporter
KKF83591.1	hypothetical protein		K11391	312.83	657.9	3.4e-198	23S rRNA (guanine1835-N2)-methyltransferase [EC:2.1.1.174]	XF37_11975	-1.40103	0.0119514		hypothetical protein
KKF83255.1	molybdate ABC transporter permease	modB	K02018	249.97	292.6	2.3e-87	molybdate transport system permease protein	XF37_13520	-1.40587	0.00126421	modB	molybdate ABC transporter permease
KKF81691.1	adenosine nucleotide hydrolase	nudE	K08312	161.4	316.2	1.7e-95	ADP-ribose diphosphatase [EC:3.6.1.-]	XF37_22040	-1.40803	0.000160842	nudE	adenosine nucleotide hydrolase
KKF80411.1	tyrosine recombinase		K07358	250.7	294.6	7.6e-89	type 1 fimbriae regulatory protein FimE	XF37_26790	-1.40843	0.00551552		tyrosine recombinase
KKF81543.1	acid-resistance protein	hdeB	K19778	59.1	135.2	3.2e-40	acid stress chaperone HdeB	XF37_21260	-1.41033	2.80544e-06	hdeB	acid-resistance protein
KKF85062.1	O-succinylbenzoic acid--CoA ligase		K01911	353.7	400.5	3.8e-120	O-succinylbenzoic acid---CoA ligase [EC:6.2.1.26]	XF37_04220	-1.41048	0.0202078		O-succinylbenzoic acid--CoA ligase
KKF84278.1	phenylhydantoinase		K01464	406.8	580.3	1.4e-174	dihydropyrimidinase [EC:3.5.2.2]	XF37_08445	-1.41052	0.0355428		phenylhydantoinase
KKF84124.1	murein transglycosylase	mltA	K08304	183.37	420.1	5.1e-126	membrane-bound lytic murein transglycosylase A [EC:4.2.2.-]	XF37_08860	-1.41065	3.50331e-06	mltA	murein transglycosylase
KKF83736.1	GTP-binding protein Era		K03595	150	378.1	1.3e-113	GTPase	XF37_09845	-1.41236	3.16868e-05		GTP-binding protein Era
KKF84560.1	methyl-accepting protein IV		K05877	758.5	841.7	8.4e-254	methyl-accepting chemotaxis protein IV, peptide sensor receptor	XF37_06555	-1.41503	0.00250004		methyl-accepting protein IV
KKF80607.1	guanosine 5'-monophosphate oxidoreductase		K00364	337.43	658.5	1.5e-198	GMP reductase [EC:1.7.1.7]	XF37_27870	-1.4176	4.49654e-06		guanosine 5'-monophosphate oxidoreductase
KKF82203.1	cytochrome o ubiquinol oxidase subunit III		K02299	260.87	368.8	7.6e-111	cytochrome o ubiquinol oxidase subunit III	XF37_18740	-1.41768	2.237e-06		cytochrome o ubiquinol oxidase subunit III
KKF83889.1	flxA-like family protein		K02738	328.57	19.8	8.3e-05	20S proteasome subunit beta 1 [EC:3.4.25.1]	XF37_10640	-1.41879	8.6791e-05		flxA-like family protein
KKF83733.1	elongation factor 4		K03596	909	1042.3	0	GTP-binding protein LepA	XF37_09830	-1.42005	1.17106e-05		elongation factor 4
KKF84909.1	iron-enterobactin transporter permease		K23187	459.43	537.6	3e-162	ferric enterobactin transport system permease protein	XF37_05065	-1.42086	0.0135378		iron-enterobactin transporter permease
KKF82914.1	tyrosyl-tRNA synthetase		K01866	90.1	440.4	3.7e-132	tyrosyl-tRNA synthetase [EC:6.1.1.1]	XF37_14150	-1.42111	9.5677e-06		tyrosyl-tRNA synthetase
KKF84143.1	7-cyano-7-deazaguanine reductase	queF	K06879	216.73	469	4.8e-141	7-cyano-7-deazaguanine reductase [EC:1.7.1.13]	XF37_08955	-1.42164	2.59755e-07	queF	7-cyano-7-deazaguanine reductase
KKF81993.1	aromatic amino acid aminotransferase		K00813	527.17	650	3.8e-196	aspartate aminotransferase [EC:2.6.1.1]	XF37_19255	-1.42389	6.24332e-08		aromatic amino acid aminotransferase
KKF82030.1	thioredoxin reductase		K22345	572.67	556.2	4.9e-168	glucosaminate ammonia-lyase [EC:4.3.1.9]	XF37_19445	-1.42769	6.33285e-07		thioredoxin reductase
KKF82906.1	electron transporter RnfD	rnfD	K03614	294.27	458	9.4e-138	Na+-translocating ferredoxin:NAD+ oxidoreductase subunit D [EC:7.2.1.2]	XF37_14110	-1.42897	0.000352275	rnfD	electron transporter RnfD
KKF82617.1	colanic acid biosynthesis glycosyltransferase WcaL		K16703	244.63	363.7	5.8e-109	colanic acid/amylovoran biosynthesis glycosyltransferase [EC:2.4.-.-]	XF37_17160	-1.43035	0.00253211		colanic acid biosynthesis glycosyltransferase WcaL
KKF80548.1	oxidoreductase		K00313	301.6	578.6	2.5e-174	electron transfer flavoprotein-quinone oxidoreductase [EC:1.5.5.-]	XF37_27555	-1.43038	0.0187528		oxidoreductase
KKF81465.1	hypothetical protein		K07804	170.23	165.3	4.1e-49	putatice virulence related protein PagC	XF37_22740	-1.43085	0.0103965		hypothetical protein
KKF81439.1	endonuclease		K01174	68.73	149.3	4.4e-44	micrococcal nuclease [EC:3.1.31.1]	XF37_22805	-1.43129	0.00843347		endonuclease
KKF85593.1	UDP-N-acetylglucosamine 2-epimerase		K01791	427.33	604.2	8e-182	UDP-N-acetylglucosamine 2-epimerase (non-hydrolysing) [EC:5.1.3.14]	XF37_01275	-1.4354	0.0159038		UDP-N-acetylglucosamine 2-epimerase
KKF80486.1	purine nucleoside phosphorylase	deoD	K03784	222.6	421.5	7.2e-127	purine-nucleoside phosphorylase [EC:2.4.2.1]	XF37_27210	-1.43708	5.10004e-08	deoD	purine nucleoside phosphorylase
KKF82605.1	colanic acid biosynthesis protein	wcaD	K13620	440.9	790.2	1.2e-238	putative colanic acid polymerase	XF37_17100	-1.4425	0.00121653	wcaD	colanic acid biosynthesis protein
KKF80570.1	thiamine ABC transporter ATP-binding protein	thiQ	K02062	402.6	319.6	1e-95	thiamine transport system ATP-binding protein [EC:7.6.2.15]	XF37_27675	-1.44278	0.0298767	thiQ	thiamine ABC transporter ATP-binding protein
KKF84008.1	LysR family transcriptional regulator		K21755	250.2	81.7	1.6e-23	LysR family transcriptional regulator, salicylic acid-responsive activa	XF37_08205	-1.4445	0.0209859		LysR family transcriptional regulator
KKF85699.1	transcriptional regulator		K07686	267.1	322.6	2.9e-97	two-component system, NarL family, uhpT operon response regulator UhpA	XF37_00300	-1.4459	0.0121629		transcriptional regulator
KKF81057.1	phosphatidylserine decarboxylase	psd	K01613	25.07	302.9	1.2e-90	phosphatidylserine decarboxylase [EC:4.1.1.65]	XF37_25245	-1.44786	9.2468e-06	psd	phosphatidylserine decarboxylase
KKF81818.1	23S rRNA pseudouridylate synthase		K06179	334.27	460.6	2.7e-138	23S rRNA pseudouridine955/2504/2580 synthase [EC:5.4.99.24]	XF37_20710	-1.44789	0.00502385		23S rRNA pseudouridylate synthase
KKF84458.1	protein tyrosine phosphatase		K20201	168	109.6	3.5e-32	protein arginine phosphatase [EC:3.9.1.2]	XF37_06735	-1.44805	0.000331979		protein tyrosine phosphatase
KKF83496.1	50S ribosomal protein L27	rpmA	K02899	32.87	152.9	3.4e-45	large subunit ribosomal protein L27	XF37_11470	-1.44851	0.00895551	rpmA	50S ribosomal protein L27
KKF82415.1	formate dehydrogenase		K08348	1598.57	1522.9	0	formate dehydrogenase-N, alpha subunit [EC:1.17.5.3]	XF37_17735	-1.45122	2.3873e-06		formate dehydrogenase
KKF80526.1	30S ribosomal protein S20	rpsT	K02968	28.97	119.6	5.2e-35	small subunit ribosomal protein S20	XF37_27440	-1.45273	0.00533785	rpsT	30S ribosomal protein S20
KKF80649.1	2'-5' RNA ligase		K01975	66	178.4	7.5e-53	RNA 2',3'-cyclic 3'-phosphodiesterase [EC:3.1.4.58]	XF37_28085	-1.45292	0.000266344		2'-5' RNA ligase
KKF82158.1	peptidase M85		K23655	658.63	746.8	6.1e-226	T3SS secreted effector NleC	XF37_20115	-1.45323	0.00568751		peptidase M85
KKF81279.1	2,5-diketo-D-gluconic acid reductase	dkgB	K06222	318.67	465.9	3e-140	2,5-diketo-D-gluconate reductase B [EC:1.1.1.346]	XF37_23855	-1.45401	0.00680457	dkgB	2,5-diketo-D-gluconic acid reductase
KKF84234.1	alanyl-tRNA synthetase		K01872	199.93	1256.5	0	alanyl-tRNA synthetase [EC:6.1.1.7]	XF37_09470	-1.45409	5.26395e-07		alanyl-tRNA synthetase
KKF85665.1	type III secretion protein ATPase		K03224	619.63	608.6	1.7e-183	ATP synthase in type III secretion protein N [EC:7.4.2.8]	XF37_00105	-1.45631	0.0087063		type III secretion protein ATPase
KKF83721.1	methyltransferase		K03214	220.97	480.9	7.1e-145	RNA methyltransferase, TrmH family [EC:2.1.1.-]	XF37_09765	-1.45811	0.00147702		methyltransferase
KKF84173.1	6-carboxy-5,6,7,8-tetrahydropterin synthase		K01737	27.8	154.3	1.1e-45	6-pyruvoyltetrahydropterin/6-carboxytetrahydropterin synthase [EC:4.2.3	XF37_09125	-1.46024	0.00405769		6-carboxy-5,6,7,8-tetrahydropterin synthase
KKF81900.1	vitamin B12/cobalamin outer membrane transporter	btuB	K16092	409.6	525.2	1.3e-157	vitamin B12 transporter	XF37_20215	-1.46086	2.78683e-07	btuB	vitamin B12/cobalamin outer membrane transporter
KKF81245.1	hypothetical protein		K07126	60.17	41.4	3.3e-11	uncharacterized protein	XF37_23670	-1.46592	0.001056		hypothetical protein
KKF84491.1	peroxidase		K16301	459.97	565.1	2.8e-170	deferrochelatase/peroxidase EfeB [EC:1.11.1.-]	XF37_06920	-1.4672	0.000792752		peroxidase
KKF82851.1	secretion protein EspJ		K23648	362.9	443.6	2.8e-134	T3SS secreted effector ADP-ribosyltransferase EspJ	XF37_15760	-1.4693	0.0150314		secretion protein EspJ
KKF84192.1	2-C-methyl-D-erythritol 2,4-cyclodiphosphate synthase	ispF	K01770	248.63	274.2	4.8e-82	2-C-methyl-D-erythritol 2,4-cyclodiphosphate synthase [EC:4.6.1.12]	XF37_09225	-1.47034	5.90028e-05	ispF	2-C-methyl-D-erythritol 2,4-cyclodiphosphate synthase
KKF83974.1	hypothetical protein		K02221	23.57	72.7	1.2e-20	YggT family protein	XF37_08025	-1.4707	0.000294875		hypothetical protein
KKF80498.1	transcriptional regulator		K07663	268.4	340.2	1.3e-102	two-component system, OmpR family, catabolic regulation response regula	XF37_27285	-1.4725	0.00130297		transcriptional regulator
KKF82909.1	endonuclease III		K10773	133.07	286.6	1.1e-85	endonuclease III [EC:4.2.99.18]	XF37_14125	-1.47255	0.00282901		endonuclease III
KKF84863.1	50S rRNA methyltransferase		K00783	54.23	184.1	9.4e-55	23S rRNA (pseudouridine1915-N3)-methyltransferase [EC:2.1.1.177]	XF37_04825	-1.47271	0.000725245		50S rRNA methyltransferase
KKF81920.1	fructose-6-phosphate aldolase		K08313	362.57	352.9	2e-106	fructose-6-phosphate aldolase 1 [EC:4.1.2.-]	XF37_20320	-1.47466	0.015105		fructose-6-phosphate aldolase
KKF82630.1	mannose-1-phosphate guanylyltransferase		K16011	548.7	684	3.8e-206	mannose-1-phosphate guanylyltransferase / mannose-6-phosphate isomerase	XF37_17225	-1.47664	6.95841e-08		mannose-1-phosphate guanylyltransferase
KKF82199.1	hypothetical protein		K07286	71.8	267.4	2.4e-80	uncharacterized lipoprotein	XF37_18720	-1.477	0.000746724		hypothetical protein
KKF82045.1	hydroxylamine reductase		K05601	98.47	801.8	1e-241	hydroxylamine reductase [EC:1.7.99.1]	XF37_19525	-1.4775	0.0345449		hydroxylamine reductase
KKF82693.1	hypothetical protein		K21965	149.97	249.9	5.7e-75	Mat/Ecp fimbriae periplasmic chaperone	XF37_16280	-1.47875	0.0130014		hypothetical protein
KKF85031.1	acetate kinase		K00925	124.57	589.5	3.2e-177	acetate kinase [EC:2.7.2.1]	XF37_04055	-1.48096	6.07308e-06		acetate kinase
KKF80730.1	urease accessory protein UreF		K03188	68.17	198.6	4.9e-59	urease accessory protein	XF37_26615	-1.48221	0.0210436		urease accessory protein UreF
KKF83443.1	rod shape-determining protein MreC		K03570	60.73	374.3	2.1e-112	rod shape-determining protein MreC	XF37_11180	-1.48347	0.000784979		rod shape-determining protein MreC
KKF83725.1	ATP-dependent RNA helicase SrmB		K05590	494.77	732.1	5e-221	ATP-dependent RNA helicase SrmB [EC:3.6.4.13]	XF37_09790	-1.4845	1.54079e-05		ATP-dependent RNA helicase SrmB
KKF80431.1	hypothetical protein		K06374	165.93	49.2	1.6e-13	spore maturation protein B	XF37_26900	-1.48464	0.00090274		hypothetical protein
KKF83948.1	DTW domain-containing protein YfiP		K05812	97.53	330.8	2.4e-99	DTW domain-containing protein	XF37_09750	-1.48642	0.00173919		DTW domain-containing protein YfiP
KKF84452.1	hydrogenase-1 operon protein HyaE		K03619	68.17	134.5	6.7e-40	hydrogenase-1 operon protein HyaE	XF37_06700	-1.48816	0.00313798		hydrogenase-1 operon protein HyaE
KKF85371.1	hypothetical protein		K09798	68.17	386	7.2e-116	uncharacterized protein	XF37_02140	-1.49047	0.00127641		hypothetical protein
KKF83684.1	glutathionylspermidine synthase		K01460	759.9	1189.5	0	glutathionylspermidine amidase/synthetase [EC:3.5.1.78 6.3.1.8]	XF37_12465	-1.491	6.86447e-06		glutathionylspermidine synthase
KKF85561.1	chemotaxis protein CheD		K05786	121.97	407.1	2.2e-122	chloramphenicol-sensitive protein RarD	XF37_01090	-1.49118	0.00637392		chemotaxis protein CheD
KKF84907.1	enterobactin exporter EntS		K08225	206.2	576.7	8.3e-174	MFS transporter, ENTS family, enterobactin (siderophore) exporter	XF37_05055	-1.49136	0.0393944		enterobactin exporter EntS
KKF82632.1	acetyltransferase		K17939	-	521.8	4.2e-158	GDP-perosamine N-acetyltransferase [EC:2.3.1.227]	XF37_17240	-1.49437	0.000372164		acetyltransferase
KKF83620.1	heptose 1-phosphate adenyltransferase		K03272	391.6	634.7	5.9e-191	D-beta-D-heptose 7-phosphate kinase / D-beta-D-heptose 1-phosphate aden	XF37_12145	-1.49573	0.0028166		heptose 1-phosphate adenyltransferase
KKF85479.1	50S ribosomal protein L17	rplQ	K02879	39.57	230.5	1.3e-68	large subunit ribosomal protein L17	XF37_01635	-1.49588	0.0246866	rplQ	50S ribosomal protein L17
KKF80492.1	ABC transporter ATP-binding protein		K06020	695.57	996.1	1.4e-300	energy-dependent translational throttle protein EttA	XF37_27250	-1.49608	5.34302e-07		ABC transporter ATP-binding protein
KKF81224.1	voltage-gated potassium channel		K10716	130.53	123.6	2.3e-36	voltage-gated potassium channel	XF37_24245	-1.50552	8.12266e-06		voltage-gated potassium channel
KKF85396.1	orotate phosphoribosyltransferase	pyrE	K00762	86.87	241.1	5.1e-72	orotate phosphoribosyltransferase [EC:2.4.2.10]	XF37_02265	-1.50624	0.00215833	pyrE	orotate phosphoribosyltransferase
KKF81854.1	glucan biosynthesis protein G	mdoG	K03670	301.63	828.2	2.1e-249	periplasmic glucans biosynthesis protein	XF37_20900	-1.50657	2.07564e-09	mdoG	glucan biosynthesis protein G
KKF84565.1	flagellar motor protein MotA		K02556	90.93	266	1.2e-79	chemotaxis protein MotA	XF37_06580	-1.50722	0.000586644		flagellar motor protein MotA
KKF80655.1	iron-hydroxamate transporter substrate-binding subunit		K23227	194.63	358.2	1.4e-107	ferric hydroxamate transport system substrate-binding protein	XF37_28115	-1.50853	0.0261278		iron-hydroxamate transporter substrate-binding subunit
KKF82492.1	histidine kinase		K07704	537.4	484.3	1.9e-145	two-component system, LytTR family, sensor histidine kinase LytS [EC:2.	XF37_16510	-1.50927	0.000871824		histidine kinase
KKF82223.1	nucleoside-specific channel-forming protein Tsx		K05517	113.67	446	2.1e-134	nucleoside-specific channel-forming protein	XF37_18840	-1.5105	1.29071e-05		nucleoside-specific channel-forming protein Tsx
KKF85237.1	DeoR faimly transcriptional regulator		K03436	277.6	231	6.5e-69	DeoR family transcriptional regulator, fructose operon transcriptional	XF37_03455	-1.51099	0.0243751		DeoR faimly transcriptional regulator
KKF83542.1	PTS system N-acetylgalactosamine-specific transporter subunit IIB		K10984	228.73	269.3	3e-81	galactosamine PTS system EIIB component [EC:2.7.1.-]	XF37_11715	-1.5119	0.0339247		PTS system N-acetylgalactosamine-specific transporter subunit IIB
KKF81842.1	dihydroorotase		K01465	270.27	256.8	1.6e-76	dihydroorotase [EC:3.5.2.3]	XF37_20830	-1.51207	0.000505014		dihydroorotase
KKF81822.1	flagellar hook protein FlgK	flgK	K02396	89.4	503.3	4.9e-151	flagellar hook-associated protein 1	XF37_20730	-1.51492	0.00221681	flgK	flagellar hook protein FlgK
KKF81347.1	hypothetical protein		K02234	246.53	122.5	5.9e-36	cobalamin biosynthesis protein CobW	XF37_23335	-1.5173	9.89105e-06		hypothetical protein
KKF82500.1	hypothetical protein		K03924	114.43	67.5	3e-19	MoxR-like ATPase [EC:3.6.3.-]	XF37_16550	-1.51801	0.0242172		hypothetical protein
KKF82606.1	glycosyl transferase		K13683	262.9	321.2	1.5e-96	putative colanic acid biosynthesis glycosyltransferase [EC:2.4.-.-]	XF37_17105	-1.51858	0.000410793		glycosyl transferase
KKF82598.1	membrane protein		K03699	322.57	274.2	8e-82	putative hemolysin	XF37_17065	-1.51861	1.14651e-05		membrane protein
KKF83407.1	glycyl-tRNA ligase	glyS	K01879	646.53	898.8	9e-271	glycyl-tRNA synthetase beta chain [EC:6.1.1.14]	XF37_12665	-1.52138	1.33407e-06	glyS	glycyl-tRNA ligase
KKF83928.1	aspartate carbamoyltransferase catalytic subunit		K00609	228.83	390	3.9e-117	aspartate carbamoyltransferase catalytic subunit [EC:2.1.3.2]	XF37_10870	-1.52212	3.35628e-05		aspartate carbamoyltransferase catalytic subunit
KKF83237.1	membrane protein	tolA	K03646	67.73	122	1.7e-35	colicin import membrane protein	XF37_13395	-1.52212	2.753e-07	tolA	membrane protein
KKF84915.1	outer membrane receptor protein		K19611	446.7	776	2.3e-233	ferric enterobactin receptor	XF37_05095	-1.52254	0.0022562		outer membrane receptor protein
KKF83234.1	acyl-CoA thioesterase		K07107	74.63	135.2	9.6e-40	acyl-CoA thioester hydrolase [EC:3.1.2.-]	XF37_13380	-1.52922	0.000209391		acyl-CoA thioesterase
KKF80716.1	dihydrofolate reductase	folA	K00287	63.43	212.7	2.1e-63	dihydrofolate reductase [EC:1.5.1.3]	XF37_27580	-1.52922	1.30526e-05	folA	dihydrofolate reductase
KKF81356.1	pseudouridine-5'-phosphate glycosidase		K16329	411.77	511	7.5e-154	pseudouridylate synthase [EC:4.2.1.70]	XF37_23380	-1.53189	0.0241546		pseudouridine-5'-phosphate glycosidase
KKF84205.1	carbamoyl dehydratase HypE		K04655	192.2	498.6	8.3e-150	hydrogenase expression/formation protein HypE	XF37_09295	-1.53413	0.000209264		carbamoyl dehydratase HypE
KKF81537.1	multidrug transporter		K18899	2142.27	2350.4	0	multidrug efflux pump	XF37_21230	-1.53449	8.41517e-08		multidrug transporter
KKF85466.1	shikimate dehydrogenase		K00014	195	290.1	1e-86	shikimate dehydrogenase [EC:1.1.1.25]	XF37_01570	-1.53474	0.000402078		shikimate dehydrogenase
KKF84523.1	transposase		K07480	44	192.3	5.6e-57	insertion element IS1 protein InsB	XF37_07110	-1.53505	0.0262449		transposase
KKF80642.1	fimbrial assembly protein		K07347	605.83	732.6	2.6e-220	outer membrane usher protein	XF37_28045	-1.53734	0.00273329		fimbrial assembly protein
KKF80345.1	50S ribosomal protein L7/L12	rplL	K02935	24.43	147.5	1.8e-43	large subunit ribosomal protein L7/L12	XF37_28465	-1.53817	1.92388e-08	rplL	50S ribosomal protein L7/L12
KKF84564.1	flagellar motor protein MotB	motB	K02557	141.1	255.5	2.8e-76	chemotaxis protein MotB	XF37_06575	-1.53824	0.0096222	motB	flagellar motor protein MotB
KKF81139.1	integrase		K14059	184.6	110.1	6.4e-32	integrase	XF37_24335	-1.54081	2.20854e-05		integrase
KKF82229.1	preprotein translocase subunit SecD	secD	K03072	445.03	476.5	2.8e-143	preprotein translocase subunit SecD	XF37_18870	-1.54098	8.8713e-07	secD	preprotein translocase subunit SecD
KKF82678.1	hypothetical protein		K00390	149.77	74.7	1.8e-21	phosphoadenosine phosphosulfate reductase [EC:1.8.4.8 1.8.4.10]	XF37_16345	-1.54219	0.0050845		hypothetical protein
KKF85737.1	tRNA modification GTPase TrmE	trmE	K03650	170.27	599.3	3.2e-180	tRNA modification GTPase [EC:3.6.-.-]	XF37_00505	-1.54284	0.00685207	trmE	tRNA modification GTPase TrmE
KKF83973.1	hypothetical protein		K09131	31.7	95	1.8e-27	uncharacterized protein	XF37_08020	-1.54289	0.000224043		hypothetical protein
KKF85485.1	preprotein translocase subunit SecY	secY	K03076	225.33	594.7	4.8e-179	preprotein translocase subunit SecY	XF37_01665	-1.54436	3.63176e-07	secY	preprotein translocase subunit SecY
KKF84146.1	tRNA pseudouridine synthase C		K06175	226.6	443.6	1.7e-133	tRNA pseudouridine65 synthase [EC:5.4.99.26]	XF37_08975	-1.54652	0.00556508		tRNA pseudouridine synthase C
KKF84004.1	fructose-bisphosphate aldolase		K01624	64.1	430.3	4.5e-129	fructose-bisphosphate aldolase, class II [EC:4.1.2.13]	XF37_08185	-1.54661	2.7409e-09		fructose-bisphosphate aldolase
KKF81681.1	transcription accessory protein		K06959	412.33	1196.6	0	protein Tex	XF37_21985	-1.54735	9.40572e-06		transcription accessory protein
KKF81255.1	type VI secretion protein		K11896	294.07	537.6	1.7e-161	type VI secretion system protein ImpG	XF37_23730	-1.5476	0.0115584		type VI secretion protein
KKF83980.1	DNA-specific endonuclease I		K01150	135.63	387.7	1.8e-116	deoxyribonuclease I [EC:3.1.21.1]	XF37_08060	-1.54874	0.00832725		DNA-specific endonuclease I
KKF84512.1	beta-ketoacyl-ACP synthase		K09458	474.67	370.6	4.7e-111	3-oxoacyl-[acyl-carrier-protein] synthase II [EC:2.3.1.179]	XF37_07045	-1.55007	0.00413939		beta-ketoacyl-ACP synthase
KKF82383.1	fructose 1,6-bisphosphatase		K02446	466.3	506.7	1.8e-152	fructose-1,6-bisphosphatase II [EC:3.1.3.11]	XF37_17560	-1.55033	1.96554e-05		fructose 1,6-bisphosphatase
KKF81352.1	bifunctional PTS system fructose-specific transporter subunit IIA/HPr protein		K11183	402.4	577.1	4.9e-174	multiphosphoryl transfer protein [EC:2.7.1.202]	XF37_23360	-1.55048	5.3481e-06		bifunctional PTS system fructose-specific transporter subunit IIA/HPr protein
KKF84588.1	membrane protein		K16191	207.67	107.6	4e-31	peptidoglycan-binding protein ArfA	XF37_06340	-1.55099	1.20809e-05		membrane protein
KKF83053.1	glyceraldehyde-3-phosphate dehydrogenase		K00134	180.2	621.4	3e-187	glyceraldehyde 3-phosphate dehydrogenase [EC:1.2.1.12]	XF37_14900	-1.5525	5.90785e-09		glyceraldehyde-3-phosphate dehydrogenase
KKF81088.1	PTS ascorbate-specific transporter subunit IIA		K02821	129.3	197.9	6.2e-59	ascorbate PTS system EIIA or EIIAB component [EC:2.7.1.194]	XF37_25420	-1.55274	0.007587		PTS ascorbate-specific transporter subunit IIA
KKF80437.1	type III effector		K15352	171.33	124.7	1.2e-36	secreted effector protein PipB2	XF37_26940	-1.55424	0.000136407		type III effector
KKF80843.1	fimbrial protein		K07352	183.1	195.6	1.6e-58	type 1 fimbrial protein	XF37_26080	-1.55811	0.0241387		fimbrial protein
KKF84643.1	hypothetical protein		K03976	109.33	243.5	7.1e-73	Cys-tRNA(Pro)/Cys-tRNA(Cys) deacylase [EC:3.1.1.-]	XF37_06120	-1.56422	0.000561072		hypothetical protein
KKF81410.1	ribonucleotide-diphosphate reductase subunit beta		K00526	86.67	302.7	1.4e-90	ribonucleoside-diphosphate reductase beta chain [EC:1.17.4.1]	XF37_23045	-1.56929	0.00149106		ribonucleotide-diphosphate reductase subunit beta
KKF85377.1	ADP-heptose--LPS heptosyltransferase		K02843	279.4	392.7	1e-117	heptosyltransferase II [EC:2.4.-.-]	XF37_02170	-1.5707	1.03428e-05		ADP-heptose--LPS heptosyltransferase
KKF82162.1	membrane protein		K15547	348.2	61.9	1.6e-17	multidrug resistance protein MdtO	XF37_19085	-1.57189	0.000885264		membrane protein
KKF81567.1	phosphate transporter PitA		K16322	613.9	836	2.8e-252	low-affinity inorganic phosphate transporter	XF37_21390	-1.572	3.86007e-07		phosphate transporter PitA
KKF82611.1	glycosyl transferase		K03208	211.77	526.6	2e-158	colanic acid biosynthesis glycosyl transferase WcaI	XF37_17130	-1.57336	0.00122009		glycosyl transferase
KKF81601.1	acyltransferase		K22907	290.1	148.7	7.4e-44	polyprenyl-phospho-N-acetylgalactosaminyl synthase	XF37_21565	-1.57451	0.00103512		acyltransferase
KKF84191.1	2-C-methyl-D-erythritol 4-phosphate cytidylyltransferase		K00991	250.83	295.5	1.4e-88	2-C-methyl-D-erythritol 4-phosphate cytidylyltransferase [EC:2.7.7.60]	XF37_09220	-1.57455	6.10541e-06		2-C-methyl-D-erythritol 4-phosphate cytidylyltransferase
KKF84286.1	hydrogenase nickel incorporation protein	hypA	K04651	38.63	144.7	6e-43	hydrogenase nickel incorporation protein HypA/HybF	XF37_09315	-1.57533	0.00151111	hypA	hydrogenase nickel incorporation protein
KKF84378.1	transposase		K07496	45.07	120.1	3.9e-35	putative transposase	XF37_07150	-1.57625	0.0151784		transposase
KKF83292.1	hypothetical protein		K22302	35.4	21	8.5e-05	transcriptional repressor of cell division inhibition gene dicB	XF37_13160	-1.57843	0.0208565		hypothetical protein
KKF83536.1	fimbrial protein		K15540	268.73	217.6	5.6e-65	chaperone protein EcpD	XF37_11685	-1.5822	0.0063139		fimbrial protein
KKF85369.1	phosphoglyceromutase		K15633	74.57	797.4	2.5e-240	2,3-bisphosphoglycerate-independent phosphoglycerate mutase [EC:5.4.2.1	XF37_02130	-1.58587	5.40335e-06		phosphoglyceromutase
KKF84394.1	LytTR family transcriptional regulator		K02477	204.17	247.3	6.8e-74	two-component system, LytTR family, response regulator	XF37_07240	-1.5864	1.17689e-05		LytTR family transcriptional regulator
KKF84407.1	transcriptional regulator		K07690	243.53	258.4	1e-77	two-component system, NarL family, response regulator EvgA	XF37_07310	-1.58676	1.79807e-05		transcriptional regulator
KKF82235.1	maltodextrin glucosidase		K01208	478.97	438.6	1.3e-131	cyclomaltodextrinase / maltogenic alpha-amylase / neopullulanase [EC:3.	XF37_18900	-1.58683	0.000918589		maltodextrin glucosidase
KKF81359.1	ribonucleoside hydrolase	rihB	K10213	414.6	491	4e-148	ribosylpyrimidine nucleosidase [EC:3.2.2.8]	XF37_23395	-1.58684	0.00327902	rihB	ribonucleoside hydrolase
KKF83920.1	ribonucleoside-triphosphate reductase		K04068	114.8	221.7	3.7e-66	anaerobic ribonucleoside-triphosphate reductase activating protein [EC:	XF37_10830	-1.58782	0.00637901		ribonucleoside-triphosphate reductase
KKF80774.1	tRNA 2-thiouridylase	mnmA	K00566	421.73	570.4	6.5e-172	tRNA-uridine 2-sulfurtransferase [EC:2.8.1.13]	XF37_26230	-1.58827	2.65846e-06	mnmA	tRNA 2-thiouridylase
KKF85733.1	50S ribosomal protein L34	rpmH	K02914	24.93	80	3.3e-23	large subunit ribosomal protein L34	XF37_00485	-1.58988	0.00459444	rpmH	50S ribosomal protein L34
KKF85772.1	ATP F0F1 synthase subunit C		K02110	73.77	77.2	3.3e-22	F-type H+-transporting ATPase subunit c	XF37_00695	-1.59162	5.8674e-06		ATP F0F1 synthase subunit C
KKF83768.1	hypothetical protein		K24083	334.87	200.2	1.4e-59	abhydrolase domain-containing protein 13 [EC:3.-.-.-]	XF37_10015	-1.59617	0.0183147		hypothetical protein
KKF82635.1	chain length determinant protein WzzB		K05789	243.93	384.9	1.2e-115	chain length determinant protein (polysaccharide antigen chain regulato	XF37_17255	-1.59637	1.68564e-07		chain length determinant protein WzzB
KKF81328.1	heme lyase subunit CcmH		K04017	172.5	140.7	6.9e-42	formate-dependent nitrite reductase complex subunit NrfF	XF37_23235	-1.59906	0.00010233		heme lyase subunit CcmH
KKF84057.1	xanthine dehydrogenase		K13479	286.37	385	6.6e-116	xanthine dehydrogenase FAD-binding subunit [EC:1.17.1.4]	XF37_08475	-1.59984	0.0234898		xanthine dehydrogenase
KKF83042.1	cytoplasmic asparaginase I	ansA	K13278	506.77	480.9	2.2e-144	60kDa lysophospholipase [EC:3.1.1.5 3.1.1.47 3.5.1.1]	XF37_14840	-1.60149	0.000379259	ansA	cytoplasmic asparaginase I
KKF84589.1	50S ribosomal protein L19		K02884	25.8	198.5	6e-59	large subunit ribosomal protein L19	XF37_06345	-1.60231	0.00193962		50S ribosomal protein L19
KKF81216.1	hypothetical protein		K05595	57.37	228.5	3.2e-68	multiple antibiotic resistance protein	XF37_24200	-1.60299	1.23985e-05		hypothetical protein
KKF82881.1	hypothetical protein		K12151	91.6	44	8.1e-12	multiple stress resistance protein BhsA	XF37_13975	-1.60375	1.5972e-05		hypothetical protein
KKF81783.1	spermidine/putrescine ABC transporter permease	potC	K11070	277.53	373.9	4.5e-112	spermidine/putrescine transport system permease protein	XF37_20530	-1.60378	9.88848e-08	potC	spermidine/putrescine ABC transporter permease
KKF81663.1	intramembrane serine protease GlpG		K02441	175.37	346.6	5e-104	GlpG protein	XF37_21895	-1.60613	7.12549e-05		intramembrane serine protease GlpG
KKF82057.1	arginine ABC transporter substrate-binding protein		K09997	378.67	415.4	2.2e-125	arginine transport system substrate-binding protein	XF37_19590	-1.60653	2.37045e-07		arginine ABC transporter substrate-binding protein
KKF84615.1	endodeoxyribonuclease		K01160	33.7	123.6	3.5e-36	crossover junction endodeoxyribonuclease RusA [EC:3.1.22.4]	XF37_06230	-1.60963	0.00622181		endodeoxyribonuclease
KKF83971.1	coproporphyrinogen III oxidase		K02495	287.53	341.1	3.3e-102	oxygen-independent coproporphyrinogen III oxidase [EC:1.3.98.3]	XF37_08010	-1.6099	1.9381e-06		coproporphyrinogen III oxidase
KKF85300.1	cellulose synthase		K20541	187.6	780.7	7.3e-235	cellulose synthase operon protein B	XF37_02595	-1.61123	0.0184674		cellulose synthase
KKF81045.1	entericidin A		K16347	58.7	68	1.5e-19	entericidin A	XF37_25185	-1.61862	0.0186314		entericidin A
KKF84202.1	DNA mismatch repair protein MutS		K03555	667.17	1209	0	DNA mismatch repair protein MutS	XF37_09280	-1.61984	2.7243e-05		DNA mismatch repair protein MutS
KKF81147.1	tRNA guanosine-2'-O-methyltransferase		K00556	164.73	331.7	1.1e-99	tRNA (guanosine-2'-O-)-methyltransferase [EC:2.1.1.34]	XF37_24380	-1.62286	0.000126723		tRNA guanosine-2'-O-methyltransferase
KKF81547.1	ShuX		K07227	187.43	223.5	3.4e-67	heme iron utilization protein	XF37_21285	-1.6229	0.0079817		ShuX
KKF81647.1	gluconate transporter		K06156	567.5	742.2	5.3e-224	Gnt-I system low-affinity gluconate transporter	XF37_21810	-1.62512	0.0429186		gluconate transporter
KKF84229.1	murein hydrolase effector LrgB		K08305	92.17	451.7	1.1e-135	membrane-bound lytic murein transglycosylase B [EC:4.2.2.-]	XF37_09445	-1.62594	0.000224043		murein hydrolase effector LrgB
KKF85767.1	ATP synthase F0F1 subunit beta		K02133	1041.37	929.7	8.4e-280	F-type H+-transporting ATPase subunit beta [EC:7.1.2.2]	XF37_00670	-1.62692	1.87204e-08		ATP synthase F0F1 subunit beta
KKF81189.1	SAM-dependent methyltransferase		K02493	233.73	339.3	1.5e-101	release factor glutamine methyltransferase [EC:2.1.1.297]	XF37_24050	-1.62702	6.13198e-05		SAM-dependent methyltransferase
KKF83109.1	prop expression regulator		K03607	40.9	209.8	2.4e-62	ProP effector	XF37_15185	-1.6335	4.76162e-07		prop expression regulator
KKF81095.1	50S ribosomal protein L9	rplI	K02939	56.97	170	2.5e-50	large subunit ribosomal protein L9	XF37_25460	-1.63709	0.00120015	rplI	50S ribosomal protein L9
KKF81073.1	23S rRNA methyltransferase		K03218	213.97	344.1	2.4e-103	23S rRNA (guanosine2251-2'-O)-methyltransferase [EC:2.1.1.185]	XF37_25345	-1.63844	5.16887e-06		23S rRNA methyltransferase
KKF85595.1	UDP-phosphate N-acetylglucosaminyl 1-phosphate transferase		K02851	238.1	313.2	9.8e-94	UDP-GlcNAc:undecaprenyl-phosphate/decaprenyl-phosphate GlcNAc-1-phospha	XF37_01285	-1.63886	1.89183e-05		UDP-phosphate N-acetylglucosaminyl 1-phosphate transferase
KKF85078.1	ribonuclease Z		K00784	91.77	270.5	9.4e-81	ribonuclease Z [EC:3.1.26.11]	XF37_04180	-1.63894	0.00121858		ribonuclease Z
KKF83238.1	translocation protein TolB	tolB	K03641	124.73	208	7.7e-62	TolB protein	XF37_13400	-1.64158	1.7142e-08	tolB	translocation protein TolB
KKF84052.1	peptidase		K01439	277.03	225.8	3.9e-67	succinyl-diaminopimelate desuccinylase [EC:3.5.1.18]	XF37_08450	-1.6421	0.00257447		peptidase
KKF81677.1	transposase		K01157	641.7	681.9	2.2e-206	recombination-promoting nuclease RpnA [EC:3.1.21.-]	XF37_21965	-1.64244	0.038598		transposase
KKF82019.1	transporter		K20265	209.3	197.6	9.2e-59	glutamate:GABA antiporter	XF37_19390	-1.6439	0.000823021		transporter
KKF82619.1	UDP-N-acetylglucosamine 4-epimerase		K19997	228.2	449.4	2.2e-135	GlcNAc-P-P-Und epimerase [EC:5.1.3.26]	XF37_17170	-1.64397	1.11614e-06		UDP-N-acetylglucosamine 4-epimerase
KKF83068.1	diguanylate cyclase		K13069	224.5	351.3	2.7e-105	diguanylate cyclase [EC:2.7.7.65]	XF37_14975	-1.6459	0.000165765		diguanylate cyclase
KKF85523.1	hypothetical protein		K02849	273.63	91.2	1.6e-26	heptosyltransferase III [EC:2.4.-.-]	XF37_01460	-1.64827	0.0108475		hypothetical protein
KKF80346.1	DNA-directed RNA polymerase subunit beta	rpoB	K03043	602.53	1768.7	0	DNA-directed RNA polymerase subunit beta [EC:2.7.7.6]	XF37_28470	-1.64925	5.59491e-08	rpoB	DNA-directed RNA polymerase subunit beta
KKF83862.1	coproporphyrinogen III oxidase		K00228	63.8	528.5	6.1e-159	coproporphyrinogen III oxidase [EC:1.3.3.3]	XF37_10500	-1.65194	0.000132228		coproporphyrinogen III oxidase
KKF81772.1	hypothetical protein		K07482	99.13	244.2	9.2e-73	transposase, IS30 family	XF37_21105	-1.65239	0.000306968		hypothetical protein
KKF84126.1	CsdA-binding activator		K02426	101.6	146.6	2.2e-43	cysteine desulfuration protein SufE	XF37_08870	-1.65431	0.000839781		CsdA-binding activator
KKF83962.1	murein transglycosylase	mltC	K08306	250.83	544.2	8.2e-164	membrane-bound lytic murein transglycosylase C [EC:4.2.2.-]	XF37_07965	-1.65445	6.71998e-05	mltC	murein transglycosylase
KKF85467.1	tRNA(ANN) t(6)A37 threonylcarbamoyladenosine modification protein		K07566	83.73	185.2	7.5e-55	L-threonylcarbamoyladenylate synthase [EC:2.7.7.87]	XF37_01575	-1.65493	4.54869e-07		tRNA(ANN) t(6)A37 threonylcarbamoyladenosine modification protein
KKF82616.1	colanic acid biosynthesis protein		K16710	134.23	425.5	6.7e-128	colanic acid/amylovoran biosynthesis protein	XF37_17155	-1.65536	0.00314435		colanic acid biosynthesis protein
KKF80818.1	tRNA 2-selenouridine synthase		K06917	130.2	422.2	6.7e-127	tRNA 2-selenouridine synthase [EC:2.9.1.3]	XF37_25950	-1.65853	3.40159e-06		tRNA 2-selenouridine synthase
KKF82609.1	GDP-fucose synthetase		K02377	214.6	529.8	1.4e-159	GDP-L-fucose synthase [EC:1.1.1.271]	XF37_17120	-1.66064	0.000487716		GDP-fucose synthetase
KKF82119.1	23S rRNA methyltransferase		K06970	371.03	454.1	2e-136	23S rRNA (adenine1618-N6)-methyltransferase [EC:2.1.1.181]	XF37_19915	-1.66374	0.00355346		23S rRNA methyltransferase
KKF82241.1	exonuclease SbcC		K03546	183.77	579.8	4.7e-174	DNA repair protein SbcC/Rad50	XF37_18930	-1.6651	1.28149e-05		exonuclease SbcC
KKF82849.1	cytochrome B561		K12262	82.77	194.3	3.6e-58	superoxide oxidase [EC:1.10.3.17]	XF37_15750	-1.66521	7.94397e-07		cytochrome B561
KKF81814.1	phosphate acyltransferase		K03621	162.1	463.9	1.3e-139	phosphate acyltransferase [EC:2.3.1.274]	XF37_20690	-1.66594	1.24926e-08		phosphate acyltransferase
KKF80546.1	electron transfer flavoprotein		K03521	54	197.4	1.3e-58	electron transfer flavoprotein beta subunit	XF37_27545	-1.66703	0.018659		electron transfer flavoprotein
KKF83385.1	membrane protein		K03543	286.77	164.9	9e-49	membrane fusion protein, multidrug efflux system	XF37_12555	-1.66794	0.00255585		membrane protein
KKF85154.1	hypothetical protein		K00981	54.97	178.8	5.1e-53	phosphatidate cytidylyltransferase [EC:2.7.7.41]	XF37_03010	-1.6688	0.0466202		hypothetical protein
KKF81355.1	pseudouridine kinase		K16328	233.1	416.6	2.8e-125	pseudouridine kinase [EC:2.7.1.83]	XF37_23375	-1.67076	0.00240666		pseudouridine kinase
KKF82277.1	LuxR family transcriptional regulator		K07687	199.47	44	4.1e-12	two-component system, NarL family, captular synthesis response regulato	XF37_18180	-1.67312	0.0371091		LuxR family transcriptional regulator
KKF83047.1	hypothetical protein		K08302	386.97	288.1	2.3e-86	tagatose 1,6-diphosphate aldolase GatY/KbaY [EC:4.1.2.40]	XF37_14870	-1.67485	1.34974e-05		hypothetical protein
KKF82022.1	dimethyl sulfoxide reductase		K07312	461.7	381.4	7.4e-115	Tat-targeted selenate reductase subunit YnfH	XF37_19405	-1.67725	0.00925356		dimethyl sulfoxide reductase
KKF83639.1	DNA topoisomerase IV subunit B		K02622	868.4	924.8	1.1e-278	topoisomerase IV subunit B [EC:5.6.2.2]	XF37_12240	-1.67743	2.14912e-06		DNA topoisomerase IV subunit B
KKF84490.1	ferrous iron transporter		K07224	219.1	525.1	5e-158	iron uptake system component EfeO	XF37_06915	-1.67918	2.15766e-05		ferrous iron transporter
KKF85380.1	lipopolysaccharide 1,2-N-acetylglucosaminetransferase		K00713	490.73	537.2	6e-162	UDP-glucose:(glucosyl)LPS alpha-1,2-glucosyltransferase [EC:2.4.1.-]	XF37_02185	-1.68037	2.8569e-06		lipopolysaccharide 1,2-N-acetylglucosaminetransferase
KKF81008.1	transcriptional regulator		K07771	310.57	338.8	4.2e-102	two-component system, OmpR family, response regulator BasR	XF37_24985	-1.68604	1.15163e-05		transcriptional regulator
KKF81307.1	membrane protein		K09475	583.77	623.9	2.5e-188	outer membrane pore protein C	XF37_23125	-1.68621	9.87276e-11		membrane protein
KKF84967.1	AraC family transcriptional regulator		K21906	205.6	187.1	1.5e-55	AraC family transcriptional regulator, glutamate-dependent acid resista	XF37_04475	-1.68919	0.000597776		AraC family transcriptional regulator
KKF80601.1	preprotein translocase subunit SecA	secA	K03070	322	1307.7	0	preprotein translocase subunit SecA [EC:7.4.2.8]	XF37_27840	-1.69665	2.14333e-06	secA	preprotein translocase subunit SecA
KKF81067.1	cell division protein FtsH		K04088	150.43	481.9	5.9e-145	modulator of FtsH protease HflK	XF37_25315	-1.69757	1.28898e-09		cell division protein FtsH
KKF81066.1	GTPase HflX		K03665	180.03	572	4.7e-172	GTPase	XF37_25310	-1.70139	6.7457e-10		GTPase HflX
KKF83108.1	carboxy-terminal protease		K03797	131.97	338.9	2e-101	carboxyl-terminal processing protease [EC:3.4.21.102]	XF37_15180	-1.70502	5.48865e-08		carboxy-terminal protease
KKF84451.1	hydrogenase 1 maturation protease		K03605	103.07	184.5	1.2e-54	hydrogenase maturation protease [EC:3.4.23.-]	XF37_06695	-1.70592	3.96383e-05		hydrogenase 1 maturation protease
KKF84924.1	aromatic amino acid transporter		K11732	846.63	942.9	8.2e-285	phenylalanine-specific permease	XF37_05150	-1.70597	1.7703e-05		aromatic amino acid transporter
KKF82018.1	pyruvate formate lyase-activating enzyme 1	pflA	K04069	116.6	278.8	1.7e-83	pyruvate formate lyase activating enzyme [EC:1.97.1.4]	XF37_19385	-1.70743	5.33557e-07	pflA	pyruvate formate lyase-activating enzyme 1
KKF85487.1	50S ribosomal protein L30	rpmD	K02907	35.3	74.3	3.6e-21	large subunit ribosomal protein L30	XF37_01675	-1.7079	0.00150303	rpmD	50S ribosomal protein L30
KKF80572.1	thiamine ABC transporter substrate-binding protein	tbpA	K02064	187.83	490.7	1e-147	thiamine transport system substrate-binding protein	XF37_27685	-1.7082	0.00434324	tbpA	thiamine ABC transporter substrate-binding protein
KKF83312.1	exotoxin		K11005	1049.43	1270	0	hemolysin A	XF37_13065	-1.70914	2.22317e-05		exotoxin
KKF81208.1	formyltetrahydrofolate deformylase		K01433	203.77	396.6	4.1e-119	formyltetrahydrofolate deformylase [EC:3.5.1.10]	XF37_24160	-1.70957	6.10541e-06		formyltetrahydrofolate deformylase
KKF81188.1	peptide chain release factor 1	prfA	K02835	346.53	535.3	5.8e-161	peptide chain release factor 1	XF37_24045	-1.70993	1.76951e-05	prfA	peptide chain release factor 1
KKF85365.1	glycerol-3-phosphate dehydrogenase		K00057	271.7	547	2e-164	glycerol-3-phosphate dehydrogenase (NAD(P)+) [EC:1.1.1.94]	XF37_02110	-1.71402	2.31484e-05		glycerol-3-phosphate dehydrogenase
KKF83163.1	RNA methyltransferase RsmF	yebU	K11392	336.87	750.8	1.6e-226	16S rRNA (cytosine1407-C5)-methyltransferase [EC:2.1.1.178]	XF37_15205	-1.71463	5.8356e-05	yebU	RNA methyltransferase RsmF
KKF81829.1	flagellar basal body rod modification protein	flgD	K02389	43.57	200.8	1.4e-59	flagellar basal-body rod modification protein FlgD	XF37_20765	-1.71669	0.00907199	flgD	flagellar basal body rod modification protein
KKF81678.1	ferrous iron transporter C		K07490	52.87	131	4e-39	ferrous iron transport protein C	XF37_21970	-1.71699	0.0112747		ferrous iron transporter C
KKF83498.1	GTPase CgtA	obgE	K03979	162.1	525	6.7e-158	GTPase [EC:3.6.5.-]	XF37_11480	-1.71805	1.60573e-06	obgE	GTPase CgtA
KKF81827.1	flagellar basal body rod protein FlgF	flgF	K02391	233.9	235.2	2.9e-70	flagellar basal-body rod protein FlgF	XF37_20755	-1.71861	0.000166902	flgF	flagellar basal body rod protein FlgF
KKF83112.1	hypothetical protein		K06192	145.87	682.2	2.6e-205	paraquat-inducible protein B	XF37_15200	-1.71944	4.7197e-06		hypothetical protein
KKF83492.1	UDP-N-acetylglucosamine 1-carboxyvinyltransferase		K00790	195.4	649.7	7.5e-196	UDP-N-acetylglucosamine 1-carboxyvinyltransferase [EC:2.5.1.7]	XF37_11450	-1.71948	2.94044e-08		UDP-N-acetylglucosamine 1-carboxyvinyltransferase
KKF80936.1	integrase		K14059	184.6	136.2	7.7e-40	integrase	XF37_25575	-1.72093	2.19718e-05		integrase
KKF81813.1	3-oxoacyl-ACP synthase		K00648	229.33	456.5	4.4e-137	3-oxoacyl-[acyl-carrier-protein] synthase III [EC:2.3.1.180]	XF37_20685	-1.72152	6.86759e-09		3-oxoacyl-ACP synthase
KKF85483.1	30S ribosomal protein S13		K02952	119.03	192.1	3.8e-57	small subunit ribosomal protein S13	XF37_01655	-1.72183	2.85504e-07		30S ribosomal protein S13
KKF81068.1	cell division protein FtsH		K04087	181.37	415.9	3.2e-125	modulator of FtsH protease HflC	XF37_25320	-1.72198	1.66211e-07		cell division protein FtsH
KKF81182.1	GTP-binding protein	ychF	K19788	565.07	492.1	1e-147	obg-like ATPase 1	XF37_24005	-1.72207	2.39038e-06	ychF	GTP-binding protein
KKF84551.1	arginyl-tRNA synthetase		K01887	89.47	696.5	1.9e-209	arginyl-tRNA synthetase [EC:6.1.1.19]	XF37_06510	-1.72391	1.40003e-07		arginyl-tRNA synthetase
KKF83181.1	E3 ubiquitin--protein ligase		K15352	171.33	77.5	2.7e-22	secreted effector protein PipB2	XF37_13775	-1.72517	0.00226367		E3 ubiquitin--protein ligase
KKF81809.1	3-oxoacyl-ACP synthase		K09458	474.67	607.7	7.6e-183	3-oxoacyl-[acyl-carrier-protein] synthase II [EC:2.3.1.179]	XF37_20665	-1.72897	5.44074e-07		3-oxoacyl-ACP synthase
KKF84563.1	chemotaxis protein CheA		K03407	503.93	747	1e-224	two-component system, chemotaxis family, sensor kinase CheA [EC:2.7.13.	XF37_06570	-1.73429	0.000578961		chemotaxis protein CheA
KKF81061.1	ADP-binding protein		K06925	67.3	177.1	1.1e-52	tRNA threonylcarbamoyladenosine biosynthesis protein TsaE	XF37_25285	-1.73679	0.00258824		ADP-binding protein
KKF82032.1	amino acid ABC transporter permease		K16012	450.07	681.1	4.7e-205	ATP-binding cassette, subfamily C, bacterial CydC	XF37_19455	-1.73932	0.000330572		amino acid ABC transporter permease
KKF82814.1	type III effector		K15353	786.07	95.4	7.3e-28	E3 ubiquitin-protein ligase SspH2	XF37_15560	-1.73945	0.0413802		type III effector
KKF83705.1	toxin		K18837	46.63	230.1	2.1e-69	cytoskeleton-binding toxin CbtA and related proteins	XF37_11015	-1.73951	0.000142043		toxin
KKF83256.1	molybdate transporter ATP-binding protein	modC	K02017	349.17	382.3	1.4e-114	molybdate transport system ATP-binding protein [EC:7.3.2.5]	XF37_13525	-1.74126	0.00189163	modC	molybdate transporter ATP-binding protein
KKF83798.1	GMP synthase	guaA	K01951	106.37	732.4	9.9e-221	GMP synthase (glutamine-hydrolysing) [EC:6.3.5.2]	XF37_10170	-1.74191	5.4671e-08	guaA	GMP synthase
KKF82217.1	thiamine monophosphate kinase		K00946	140.3	421.4	1.4e-126	thiamine-monophosphate kinase [EC:2.7.4.16]	XF37_18810	-1.74294	0.00020555		thiamine monophosphate kinase
KKF84493.1	PGA biosynthesis protein	pgaD	K11937	58.67	96.1	6.1e-28	biofilm PGA synthesis protein PgaD	XF37_06935	-1.74394	0.00173452	pgaD	PGA biosynthesis protein
KKF84800.1	integrase		K04763	233.77	56.7	8.2e-16	integrase/recombinase XerD	XF37_05255	-1.74618	0.000111476		integrase
KKF83495.1	50S ribosomal protein L21	rplU	K02888	27.3	138.6	5.4e-41	large subunit ribosomal protein L21	XF37_11465	-1.74747	3.9367e-08	rplU	50S ribosomal protein L21
KKF84459.1	polysaccharide export protein Wza		K01991	95.7	237.4	7.5e-71	polysaccharide biosynthesis/export protein	XF37_06740	-1.75111	0.00115468		polysaccharide export protein Wza
KKF84910.1	iron-enterobactin transporter ATP-binding protein		K23188	453.2	488.9	8.7e-148	ferric enterobactin transport system ATP-binding protein [EC:7.2.2.17]	XF37_05070	-1.75216	0.0181552		iron-enterobactin transporter ATP-binding protein
KKF84864.1	penicillin-binding protein 2		K05515	499.23	774.4	3.9e-233	penicillin-binding protein 2 [EC:3.4.16.4]	XF37_04830	-1.75635	1.7703e-05		penicillin-binding protein 2
KKF83413.1	membrane protein		K03286	114.4	139.7	4.7e-41	OmpA-OmpF porin, OOP family	XF37_12695	-1.75936	0.000371553		membrane protein
KKF81788.1	lipoprotein ABC transporter ATP-binding protein	lolD	K09810	331.27	402.2	9.8e-121	lipoprotein-releasing system ATP-binding protein [EC:3.6.3.-]	XF37_20555	-1.76102	0.000721373	lolD	lipoprotein ABC transporter ATP-binding protein
KKF84997.1	SAM-dependent methyltransferase		K07320	265.07	538.2	3.1e-162	ribosomal protein L3 glutamine methyltransferase [EC:2.1.1.298]	XF37_03885	-1.76137	1.96554e-05		SAM-dependent methyltransferase
KKF80933.1	transcriptional regulator		K22300	67.87	35	4.4e-09	HTH-type transcriptional regulator, cell division transcriptional repre	XF37_25560	-1.76779	0.0022308		transcriptional regulator
KKF80839.1	cysteine--tRNA ligase	cysS	K01883	385.57	680.3	9e-205	cysteinyl-tRNA synthetase [EC:6.1.1.16]	XF37_26060	-1.76799	5.28541e-09	cysS	cysteine--tRNA ligase
KKF83644.1	preprotein translocase subunit YidC		K02016	93.4	130	3.4e-38	iron complex transport system substrate-binding protein	XF37_12265	-1.7714	0.00124922		preprotein translocase subunit YidC
KKF84216.1	formate hydrogenlyase maturation protein HycH		K15834	188.5	210.4	3.1e-63	formate hydrogenlyase maturation protein HycH	XF37_09360	-1.772	0.0213421		formate hydrogenlyase maturation protein HycH
KKF80775.1	adenylosuccinate lyase		K01756	269.37	644.7	9.7e-194	adenylosuccinate lyase [EC:4.3.2.2]	XF37_26240	-1.77264	0.00014629		adenylosuccinate lyase
KKF83543.1	tagatose-bisphosphate aldolase	kbaY	K08302	386.97	427.6	8.4e-129	tagatose 1,6-diphosphate aldolase GatY/KbaY [EC:4.1.2.40]	XF37_11720	-1.77393	0.0290205	kbaY	tagatose-bisphosphate aldolase
KKF85771.1	ATP F0F1 synthase subunit B		K02109	42.8	121.7	1.5e-35	F-type H+-transporting ATPase subunit b	XF37_00690	-1.77502	2.92005e-09		ATP F0F1 synthase subunit B
KKF81174.1	peptide ABC transporter substrate-binding protein		K02015	71.53	320.9	3.8e-96	iron complex transport system permease protein	XF37_23960	-1.77701	0.0120238		peptide ABC transporter substrate-binding protein
KKF85474.1	potassium transporter peripheral membrane component	trkA	K03499	133.03	190.3	1.7e-56	trk system potassium uptake protein	XF37_01610	-1.77717	5.72621e-05	trkA	potassium transporter peripheral membrane component
KKF83297.1	general secretion pathway protein GspC		K02452	57.1	143.5	3.5e-42	general secretion pathway protein C	XF37_12985	-1.77766	5.11789e-05		general secretion pathway protein GspC
KKF85234.1	exoribonuclease II		K01147	384.8	461.2	2.2e-138	exoribonuclease II [EC:3.1.13.1]	XF37_03440	-1.77972	1.14363e-08		exoribonuclease II
KKF83547.1	PTS system N-acetylgalactosamine-specific transporter subunit IID		K02747	323.67	419.5	1.5e-126	N-acetylgalactosamine PTS system EIID component	XF37_11740	-1.78221	0.0173938		PTS system N-acetylgalactosamine-specific transporter subunit IID
KKF81252.1	hypothetical protein		K11900	511.07	19.3	8.4e-05	type VI secretion system protein ImpC	XF37_23715	-1.78302	0.0201165		hypothetical protein
KKF85030.1	phosphate acetyltransferase		K13788	565.67	976.7	2.8e-294	phosphate acetyltransferase [EC:2.3.1.8]	XF37_04050	-1.78306	6.36373e-07		phosphate acetyltransferase
KKF80473.1	dUMP phosphatase		K08723	232.93	330.1	3.4e-99	5'-nucleotidase [EC:3.1.3.5]	XF37_27145	-1.78345	0.000108946		dUMP phosphatase
KKF83988.1	membrane protein		K17318	183.6	20	9.5e-05	putative aldouronate transport system substrate-binding protein	XF37_08100	-1.78373	0.00162901		membrane protein
KKF84457.1	protein-tyrosine kinase		K16692	514.03	761.6	2.8e-229	tyrosine-protein kinase Etk/Wzc [EC:2.7.10.-]	XF37_06730	-1.7848	0.000111476		protein-tyrosine kinase
KKF81823.1	flagellar rod assembly protein FlgJ	flgJ	K02395	40.03	289.8	9.8e-87	peptidoglycan hydrolase FlgJ	XF37_20735	-1.78491	0.0107557	flgJ	flagellar rod assembly protein FlgJ
KKF84590.1	tRNA (guanine-N1)-methyltransferase	trmD	K00554	135.83	397.5	1.5e-119	tRNA (guanine37-N1)-methyltransferase [EC:2.1.1.228]	XF37_06350	-1.78593	3.08598e-07	trmD	tRNA (guanine-N1)-methyltransferase
KKF83769.1	inositol monophosphatase		K01092	207.97	343.6	7.3e-103	myo-inositol-1(or 4)-monophosphatase [EC:3.1.3.25]	XF37_10020	-1.78655	1.103e-05		inositol monophosphatase
KKF82633.1	6-phosphogluconate dehydrogenase		K00033	190.5	800.7	3.5e-241	6-phosphogluconate dehydrogenase [EC:1.1.1.44 1.1.1.343]	XF37_17245	-1.78702	6.24332e-08		6-phosphogluconate dehydrogenase
KKF85499.1	30S ribosomal protein S3		K02982	111.43	363.7	2.2e-109	small subunit ribosomal protein S3	XF37_01735	-1.78927	1.76579e-06		30S ribosomal protein S3
KKF82058.1	arginine transporter permease subunit ArtQ		K09999	250.87	405.3	1.7e-122	arginine transport system permease protein	XF37_19595	-1.79021	0.000591971		arginine transporter permease subunit ArtQ
KKF84867.1	D-alanyl-D-alanine carboxypeptidase		K07258	246.73	377.4	4.3e-113	serine-type D-Ala-D-Ala carboxypeptidase (penicillin-binding protein 5/	XF37_04845	-1.792	7.4485e-07		D-alanyl-D-alanine carboxypeptidase
KKF83926.1	endoribonuclease L-PSP		K09022	76.87	190.9	7.6e-57	2-iminobutanoate/2-iminopropanoate deaminase [EC:3.5.99.10]	XF37_10860	-1.79571	3.9906e-08		endoribonuclease L-PSP
KKF80564.1	ATP-dependent helicase		K03580	298.23	1376.7	0	ATP-dependent helicase HepA [EC:3.6.4.-]	XF37_27640	-1.79673	7.34991e-06		ATP-dependent helicase
KKF83516.1	DEAD/DEAH box helicase		K05592	535.33	765.5	1.4e-230	ATP-dependent RNA helicase DeaD [EC:3.6.4.13]	XF37_11585	-1.79693	5.78491e-08		DEAD/DEAH box helicase
KKF85555.1	hydrolase		K11938	170.6	235.7	1.7e-70	HMP-PP phosphatase [EC:3.6.1.-]	XF37_01055	-1.80188	1.16669e-05		hydrolase
KKF80571.1	thiamine ABC transporter permease	thiP	K02063	302.97	617.6	5.8e-186	thiamine transport system permease protein	XF37_27680	-1.80321	0.00400397	thiP	thiamine ABC transporter permease
KKF85480.1	DNA-directed RNA polymerase subunit alpha		K03040	54.37	421.5	1.6e-126	DNA-directed RNA polymerase subunit alpha [EC:2.7.7.6]	XF37_01640	-1.80352	8.97489e-09		DNA-directed RNA polymerase subunit alpha
KKF84606.1	diguanylate cyclase		K21021	270.97	296.7	1.4e-88	diguanylate cyclase [EC:2.7.7.65]	XF37_06335	-1.80464	0.000119631		diguanylate cyclase
KKF84842.1	(dimethylallyl)adenosine tRNA methylthiotransferase		K06168	458.6	713.6	5.3e-215	tRNA-2-methylthio-N6-dimethylallyladenosine synthase [EC:2.8.4.3]	XF37_04705	-1.80652	1.15336e-06		(dimethylallyl)adenosine tRNA methylthiotransferase
KKF82885.1	transcriptional regulator		K07661	322.43	351.7	4.9e-106	two-component system, OmpR family, response regulator RstA	XF37_13995	-1.80893	2.64178e-05		transcriptional regulator
KKF81830.1	flagellar basal body rod protein FlgC	flgC	K02388	58.6	190.2	1.3e-56	flagellar basal-body rod protein FlgC	XF37_20770	-1.81247	0.000486444	flgC	flagellar basal body rod protein FlgC
KKF82711.1	exonuclease		K10906	120.17	204.7	8.3e-61	exodeoxyribonuclease VIII [EC:3.1.11.-]	XF37_16210	-1.81376	0.000592838		exonuclease
KKF82913.1	pyridoxamine kinase		K00868	150.33	288.3	2.5e-86	pyridoxine kinase [EC:2.7.1.35]	XF37_14145	-1.81554	0.000297696		pyridoxamine kinase
KKF83685.1	phosphate transporter PitA		K16322	613.9	663.3	6.4e-200	low-affinity inorganic phosphate transporter	XF37_12470	-1.8173	0.00593437		phosphate transporter PitA
KKF85288.1	cytochrome C peroxidase		K00428	114.7	343.8	5.7e-103	cytochrome c peroxidase [EC:1.11.1.5]	XF37_02520	-1.82024	0.000128604		cytochrome C peroxidase
KKF82207.1	nucleotide-binding protein		K09767	78.03	262.1	8.6e-79	cyclic-di-GMP-binding protein	XF37_18760	-1.82166	2.21721e-07		nucleotide-binding protein
KKF84450.1	hydrogenase 1 b-type cytochrome subunit		K03620	105.5	282.6	5.9e-85	Ni/Fe-hydrogenase 1 B-type cytochrome subunit	XF37_06690	-1.82468	5.43945e-05		hydrogenase 1 b-type cytochrome subunit
KKF81311.1	multidrug transporter membrane component/ATP-binding component		K06159	577.1	845.5	6.9e-255	multidrug/microcin transport system ATP-binding/permease protein	XF37_23145	-1.82719	2.98826e-05		multidrug transporter membrane component/ATP-binding component
KKF84071.1	type III secretion system protein SpaQ		K22508	114.4	156.9	3.5e-47	type III secretion system export apparatus protein	XF37_08560	-1.82791	0.0396466		type III secretion system protein SpaQ
KKF81234.1	ribose-phosphate pyrophosphokinase		K00948	73.33	495.4	4.7e-149	ribose-phosphate pyrophosphokinase [EC:2.7.6.1]	XF37_24025	-1.82905	2.65596e-06		ribose-phosphate pyrophosphokinase
KKF80430.1	isoaspartyl dipeptidase		K01305	251.07	530.7	5.1e-160	beta-aspartyl-dipeptidase (metallo-type) [EC:3.4.19.-]	XF37_26895	-1.8293	0.000790033		isoaspartyl dipeptidase
KKF82196.1	trigger factor		K03545	68.23	441	2.1e-132	trigger factor	XF37_18705	-1.82976	4.10788e-09		trigger factor
KKF83379.1	selenocysteinyl-tRNA-specific translation factor		K03833	307.4	453.7	3.8e-136	selenocysteine-specific elongation factor	XF37_12525	-1.83037	1.03072e-05		selenocysteinyl-tRNA-specific translation factor
KKF85112.1	TonB-dependent receptor		K16092	409.6	312.4	3.1e-93	vitamin B12 transporter	XF37_02785	-1.83155	0.000296161		TonB-dependent receptor
KKF84000.1	membrane protein		K16923	59.23	198.4	4e-59	energy-coupling factor transport system substrate-specific component	XF37_08165	-1.83218	0.000958505		membrane protein
KKF84823.1	putrescine transporter	potE	K03756	497.23	772.7	3.4e-233	putrescine:ornithine antiporter	XF37_04570	-1.8334	1.21663e-05	potE	putrescine transporter
KKF85029.1	hypothetical protein		K12942	219.3	28.2	1.5e-07	aminobenzoyl-glutamate transport protein	XF37_04045	-1.83409	0.0450815		hypothetical protein
KKF85397.1	ribonuclease PH	rph	K00989	241.87	457.3	1.1e-137	ribonuclease PH [EC:2.7.7.56]	XF37_02270	-1.83844	0.000125969	rph	ribonuclease PH
KKF83461.1	30S ribosomal protein S9		K02996	106.8	214	9.1e-64	small subunit ribosomal protein S9	XF37_11275	-1.84622	1.33407e-06		30S ribosomal protein S9
KKF80802.1	lysogenization regulator		K07153	97.67	300.2	2.4e-90	high frequency lysogenization protein	XF37_26235	-1.84823	1.51695e-07		lysogenization regulator
KKF80837.1	UDP-2,3-diacylglucosamine hydrolase		K03269	66.1	338.9	8.2e-102	UDP-2,3-diacylglucosamine hydrolase [EC:3.6.1.54]	XF37_26050	-1.84853	0.000183334		UDP-2,3-diacylglucosamine hydrolase
KKF83460.1	50S ribosomal protein L13		K02871	74.67	247.4	6e-74	large subunit ribosomal protein L13	XF37_11270	-1.84876	2.66096e-07		50S ribosomal protein L13
KKF83694.1	hypothetical protein		K05527	70.47	56	1.2e-15	BolA family transcriptional regulator, general stress-responsive regula	XF37_11445	-1.85077	7.96372e-05		hypothetical protein
KKF83430.1	tRNA-dihydrouridine synthase B		K05540	283.53	482.2	3.4e-145	tRNA-dihydrouridine synthase B [EC:1.-.-.-]	XF37_11115	-1.8511	3.27286e-08		tRNA-dihydrouridine synthase B
KKF85543.1	twin-arginine protein translocation system subunit TatC		K03118	33.77	325.3	1.1e-97	sec-independent protein translocase protein TatC	XF37_00995	-1.85179	0.00158955		twin-arginine protein translocation system subunit TatC
KKF82805.1	flagellar biosynthesis protein FliT		K02423	24.17	107.3	2.9e-31	flagellar protein FliT	XF37_15510	-1.85284	0.00168667		flagellar biosynthesis protein FliT
KKF85668.1	SepZ		K23659	153.77	165.4	8.7e-50	LEE-encoded effector EspZ	XF37_00120	-1.85412	7.09972e-05		SepZ
KKF85361.1	transcriptional regulator		K14348	253.87	366.9	2.4e-110	GntR family transcriptional regulator, L-lactate dehydrogenase operon r	XF37_02090	-1.85419	0.000160842		transcriptional regulator
KKF83054.1	glucose-6-phosphate 1-epimerase		K01792	124.5	293	1.5e-87	glucose-6-phosphate 1-epimerase [EC:5.1.3.15]	XF37_14905	-1.8543	6.6921e-05		glucose-6-phosphate 1-epimerase
KKF84077.1	type III secretion system lipoprotein PrgK		K22505	240.7	336.1	4.7e-101	type III secretion system inner membrane ring protein	XF37_08605	-1.8545	0.000278022		type III secretion system lipoprotein PrgK
KKF83992.1	PTS system mannitol-specific transporter subunit IIA	cmtB	K02821	129.3	158.4	6.6e-47	ascorbate PTS system EIIA or EIIAB component [EC:2.7.1.194]	XF37_08120	-1.85654	0.0158115	cmtB	PTS system mannitol-specific transporter subunit IIA
KKF84113.1	thymidylate synthase		K00560	86.7	480.7	1.3e-144	thymidylate synthase [EC:2.1.1.45]	XF37_08790	-1.86104	8.51109e-09		thymidylate synthase
KKF82288.1	hypothetical protein		K02381	461.17	617.4	7.1e-186	FdrA protein	XF37_18250	-1.86123	0.00814009		hypothetical protein
KKF81671.1	maltose phosphorylase		K00688	80.1	1158.9	0	glycogen phosphorylase [EC:2.4.1.1]	XF37_21935	-1.86419	9.97029e-09		maltose phosphorylase
KKF84926.1	copper resistance protein		K07798	294.27	438.7	1.2e-131	membrane fusion protein, copper/silver efflux system	XF37_05160	-1.86557	0.0142043		copper resistance protein
KKF84591.1	16S rRNA-processing protein RimM	rimM	K02860	38.13	177.1	1.7e-52	16S rRNA processing protein RimM	XF37_06355	-1.86599	2.15949e-08	rimM	16S rRNA-processing protein RimM
KKF80640.1	fimbrial protein		K07345	95.87	41.9	3.3e-11	major type 1 subunit fimbrin (pilin)	XF37_28035	-1.8668	0.00282259		fimbrial protein
KKF81290.1	transcriptional regulator		K04761	273.47	220.5	1.3e-65	LysR family transcriptional regulator, hydrogen peroxide-inducible gene	XF37_23025	-1.86794	1.45678e-05		transcriptional regulator
KKF83391.1	electron transporter		K05796	186.1	208.1	1.9e-62	electron transport protein HydN	XF37_12585	-1.87028	0.00559884		electron transporter
KKF83499.1	D-alanyl-D-alanine carboxypeptidase		K07259	104.57	379.5	1.4e-113	serine-type D-Ala-D-Ala carboxypeptidase/endopeptidase (penicillin-bind	XF37_11485	-1.8703	5.63266e-05		D-alanyl-D-alanine carboxypeptidase
KKF81901.1	tRNA (uracil-5-)-methyltransferase		K00557	248.4	553.6	7.2e-167	tRNA (uracil-5-)-methyltransferase [EC:2.1.1.35]	XF37_20220	-1.87257	0.000208849		tRNA (uracil-5-)-methyltransferase
KKF80461.1	phosphoglycerol transferase I		K01002	214.07	794.8	2.1e-239	phosphoglycerol transferase [EC:2.7.8.20]	XF37_27070	-1.87862	0.00103522		phosphoglycerol transferase I
KKF82232.1	S-adenosylmethionine:tRNA ribosyltransferase-isomerase	queA	K07568	180.97	504.6	5.1e-152	S-adenosylmethionine:tRNA ribosyltransferase-isomerase [EC:2.4.99.17]	XF37_18885	-1.8792	6.07308e-06	queA	S-adenosylmethionine:tRNA ribosyltransferase-isomerase
KKF83623.1	membrane protein		K07192	67.93	155.7	5.2e-46	flotillin	XF37_12160	-1.8797	0.00102722		membrane protein
KKF83987.1	arginine decarboxylase		K01583	550.4	375.8	1.1e-112	arginine decarboxylase [EC:4.1.1.19]	XF37_08095	-1.88494	2.16163e-09		arginine decarboxylase
KKF81741.1	elongation factor G	fusA	K02355	517.17	1117.9	0	elongation factor G	XF37_22295	-1.88603	1.26737e-10	fusA	elongation factor G
KKF82056.1	arginine ABC transporter ATP-binding protein		K10000	352.07	475.5	8.2e-144	arginine transport system ATP-binding protein [EC:7.4.2.1]	XF37_19585	-1.88661	1.31332e-09		arginine ABC transporter ATP-binding protein
KKF84901.1	thioesterase		K24147	254.53	297.8	2.6e-90	proofreading thioesterase EntH	XF37_05025	-1.8879	0.00529007		thioesterase
KKF82009.1	30S ribosomal protein S1	rpsA	K02945	151.43	541.1	1.4e-162	small subunit ribosomal protein S1	XF37_19340	-1.89782	1.8118e-08	rpsA	30S ribosomal protein S1
KKF82820.1	ATP synthase	fliI	K02412	630.83	743.9	2.9e-224	flagellum-specific ATP synthase [EC:7.4.2.8]	XF37_15590	-1.89827	0.0297725	fliI	ATP synthase
KKF84602.1	bfpT-regulated chaperone		K23653	254.77	345.7	1.9e-104	T3SS effector EspM	XF37_06430	-1.90198	2.98196e-05		bfpT-regulated chaperone
KKF82202.1	cytochrome o ubiquinol oxidase subunit I		K02298	960.6	1212.3	0	cytochrome o ubiquinol oxidase subunit I [EC:7.1.1.3]	XF37_18735	-1.90246	4.39197e-07		cytochrome o ubiquinol oxidase subunit I
KKF83981.1	hypothetical protein		K02742	64.93	274.5	3.9e-82	SprT protein	XF37_08065	-1.90359	0.00344966		hypothetical protein
KKF82210.1	tRNA s(4)U8 sulfurtransferase		K03151	117.13	610	1.7e-183	tRNA uracil 4-sulfurtransferase [EC:2.8.1.4]	XF37_18775	-1.90434	0.000121759		tRNA s(4)U8 sulfurtransferase
KKF84207.1	hydrogenase assembly chaperone		K04653	36.23	100.8	2.8e-29	hydrogenase expression/formation protein HypC	XF37_09305	-1.9079	0.00434497		hydrogenase assembly chaperone
KKF84164.1	membrane protein		K08194	522.57	95.5	7.7e-28	MFS transporter, ACS family, D-galactonate transporter	XF37_09075	-1.90823	0.00214617		membrane protein
KKF81265.1	membrane protein		K11911	131.6	568.3	3.7e-171	type VI secretion system protein VasL	XF37_23780	-1.90872	0.000172932		membrane protein
KKF80695.1	hypothetical protein		K21471	149.83	46.1	1.8e-12	peptidoglycan DL-endopeptidase CwlO [EC:3.4.-.-]	XF37_28315	-1.91049	0.0112729		hypothetical protein
KKF84561.1	chemotaxis protein		K05875	672.3	736.9	7.8e-222	methyl-accepting chemotaxis protein II, aspartate sensor receptor	XF37_06560	-1.91409	1.36415e-05		chemotaxis protein
KKF84629.1	adhesin		K19233	105.77	77.8	3.4e-22	ECM component-binding autotransporter adhesin	XF37_06050	-1.92656	0.00277633		adhesin
KKF82012.1	3-phosphoshikimate 1-carboxyvinyltransferase		K00800	140.5	618.2	5.2e-186	3-phosphoshikimate 1-carboxyvinyltransferase [EC:2.5.1.19]	XF37_19355	-1.92869	0.000124369		3-phosphoshikimate 1-carboxyvinyltransferase
KKF83088.1	serine dehydratase		K01752	89.87	722.6	2e-217	L-serine dehydratase [EC:4.3.1.17]	XF37_15080	-1.92911	4.81903e-06		serine dehydratase
KKF81692.1	penicillin-binding protein 1A	mrcA	K05366	610.27	782.7	1.2e-235	penicillin-binding protein 1A [EC:2.4.1.129 3.4.16.4]	XF37_22045	-1.93022	1.81562e-05	mrcA	penicillin-binding protein 1A
KKF82130.1	ATP-dependent RNA helicase RhlE		K11927	542.5	716	8.9e-216	ATP-dependent RNA helicase RhlE [EC:3.6.4.13]	XF37_19970	-1.9347	3.62327e-08		ATP-dependent RNA helicase RhlE
KKF84241.1	multidrug transporter		K07797	662.37	487.7	5.8e-147	multidrug resistance protein K	XF37_09535	-1.93702	0.000976673		multidrug transporter
KKF81538.1	multidrug transporter		K18898	486	596.8	4.1e-180	membrane fusion protein, multidrug efflux system	XF37_21235	-1.9378	8.14868e-06		multidrug transporter
KKF85656.1	type III secretory protein EscD		K03220	89.87	149.4	7e-44	type III secretion protein D	XF37_00055	-1.93958	0.00154803		type III secretory protein EscD
KKF84877.1	C4-dicarboxylate transporter	dcuC	K03326	163	619.8	7e-187	C4-dicarboxylate transporter, DcuC family	XF37_04900	-1.93973	0.00367693	dcuC	C4-dicarboxylate transporter
KKF80826.1	uracil/xanthine transporter		K16345	576.47	95.1	9.3e-28	xanthine permease XanP	XF37_25995	-1.94189	0.000156532		uracil/xanthine transporter
KKF80646.1	poly(A) polymerase I	pcnB	K00970	346.47	493.4	3.2e-148	poly(A) polymerase [EC:2.7.7.19]	XF37_28065	-1.94195	1.12165e-07	pcnB	poly(A) polymerase I
KKF81353.1	1-phosphofructokinase	fruK	K00882	323.8	430.6	1.9e-129	1-phosphofructokinase [EC:2.7.1.56]	XF37_23365	-1.94199	1.87019e-05	fruK	1-phosphofructokinase
KKF85768.1	ATP F0F1 synthase subunit gamma		K02115	245.73	373.4	3.8e-112	F-type H+-transporting ATPase subunit gamma	XF37_00675	-1.94356	1.76529e-07		ATP F0F1 synthase subunit gamma
KKF83890.1	glutamyl-tRNA ligase	gltX	K01885	306.4	609	5.1e-183	glutamyl-tRNA synthetase [EC:6.1.1.17]	XF37_10665	-1.94515	3.83144e-10	gltX	glutamyl-tRNA ligase
KKF81240.1	elongation factor Tu	tuf	K02358	364.53	688.6	3e-207	elongation factor Tu	XF37_23880	-1.94788	5.87551e-08	tuf	elongation factor Tu
KKF83951.1	inosine-5-monophosphate dehydrogenase		K00088	277	677.3	7e-204	IMP dehydrogenase [EC:1.1.1.205]	XF37_10165	-1.94809	2.91193e-07		inosine-5-monophosphate dehydrogenase
KKF85649.1	secretion protein EspF		K12786	262.57	291.1	2.5e-87	LEE-encoded effector EspF	XF37_00015	-1.95166	0.00664645		secretion protein EspF
KKF81092.1	30S ribosomal protein S6	rpsF	K02990	24.4	145.2	1.1e-42	small subunit ribosomal protein S6	XF37_25445	-1.95412	2.57923e-08	rpsF	30S ribosomal protein S6
KKF80457.1	chemotaxis protein		K05874	643.1	775.2	2e-233	methyl-accepting chemotaxis protein I, serine sensor receptor	XF37_27050	-1.96111	0.000112098		chemotaxis protein
KKF84497.1	diguanylate cyclase		K21022	259.77	218	7.6e-65	diguanylate cyclase [EC:2.7.7.65]	XF37_06955	-1.96214	2.41782e-05		diguanylate cyclase
KKF82169.1	hypothetical protein		K22320	319.17	267.5	7.2e-80	2-alkyl-3-oxoalkanoate reductase [EC:1.1.1.412]	XF37_19550	-1.96347	0.000286722		hypothetical protein
KKF82593.1	uridine kinase		K00876	136.3	263.9	6.5e-79	uridine kinase [EC:2.7.1.48]	XF37_17040	-1.96348	6.82076e-06		uridine kinase
KKF84228.1	PTS system glucitol/sorbitol-specific transporter subunit IIA		K02781	67.4	154.5	2.9e-46	glucitol/sorbitol PTS system EIIA component [EC:2.7.1.198]	XF37_09430	-1.96625	0.0320436		PTS system glucitol/sorbitol-specific transporter subunit IIA
KKF85765.1	bifunctional N-acetylglucosamine-1-phosphate uridyltransferase/glucosamine-1-phosphate acetyltransferase	glmU	K04042	331.73	680.9	4e-205	bifunctional UDP-N-acetylglucosamine pyrophosphorylase / glucosamine-1-	XF37_00660	-1.96677	1.40482e-10	glmU	bifunctional N-acetylglucosamine-1-phosphate uridyltransferase/glucosamine-1-phosphate acetyltransferase
KKF83789.1	ribosomal RNA large subunit methyltransferase N		K06941	58.07	536.9	1.1e-161	23S rRNA (adenine2503-C2)-methyltransferase [EC:2.1.1.192]	XF37_10120	-1.97033	3.58173e-06		ribosomal RNA large subunit methyltransferase N
KKF83510.1	translation initiation factor IF-2	infB	K02519	324.57	1052.2	0	translation initiation factor IF-2	XF37_11555	-1.97034	4.88678e-08	infB	translation initiation factor IF-2
KKF82886.1	sensor protein RstB		K07639	420.6	529.1	3.2e-159	two-component system, OmpR family, sensor histidine kinase RstB [EC:2.7	XF37_14000	-1.97055	0.000771827		sensor protein RstB
KKF81253.1	type VI secretion protein		K11900	511.07	680.3	1.2e-204	type VI secretion system protein ImpC	XF37_23720	-1.97153	3.65526e-05		type VI secretion protein
KKF85000.1	hypothetical protein		K07090	34.77	116.8	3.9e-34	uncharacterized protein	XF37_03900	-1.97336	9.16316e-06		hypothetical protein
KKF85654.1	secretion protein EspA		K15344	79.73	105.8	7.8e-31	secreted effector protein SseB	XF37_00045	-1.97366	0.0266278		secretion protein EspA
KKF83059.1	membrane protein		K21019	260.57	172.1	7.3e-51	diguanylate cyclase [EC:2.7.7.65]	XF37_14930	-1.97496	9.73975e-07		membrane protein
KKF81550.1	ligand-gated channel protein		K16087	359.7	517.2	3.5e-155	hemoglobin/transferrin/lactoferrin receptor protein	XF37_21305	-1.97701	0.000706868		ligand-gated channel protein
KKF80643.1	chaperone protein EcpD	ecpD	K15540	268.73	333.9	2.2e-100	chaperone protein EcpD	XF37_28050	-1.97771	0.000387346	ecpD	chaperone protein EcpD
KKF85360.1	L-lactate permease		K00427	975.07	1083.9	0	L-lactate permease	XF37_02085	-1.98058	2.48354e-05		L-lactate permease
KKF85709.1	multidrug resistance protein D	emrD	K08154	354.57	603.2	4.7e-182	MFS transporter, DHA1 family, 2-module integral membrane pump EmrD	XF37_00355	-1.98081	6.46464e-05	emrD	multidrug resistance protein D
KKF80344.1	50S ribosomal protein L10	rplJ	K02864	57.37	163.2	3.2e-48	large subunit ribosomal protein L10	XF37_28460	-1.98219	1.82627e-08	rplJ	50S ribosomal protein L10
KKF84893.1	disulfide isomerase	dsbG	K03805	113.87	335.2	1.4e-100	thiol:disulfide interchange protein DsbG	XF37_04985	-1.98367	0.000335384	dsbG	disulfide isomerase
KKF84064.1	type III secretion system outer membrane pore InvG		K22504	513.17	746	7.4e-225	type III secretion system outer membrane ring protein	XF37_08515	-1.98403	0.00674236		type III secretion system outer membrane pore InvG
KKF81557.1	ArsR family transcriptional regulator		K03892	77.67	96.8	4.7e-28	ArsR family transcriptional regulator, arsenate/arsenite/antimonite-res	XF37_21340	-1.99811	0.000182762		ArsR family transcriptional regulator
KKF82986.1	phenylalanyl-tRNA synthetase		K01889	109.17	409.9	5.8e-123	phenylalanyl-tRNA synthetase alpha chain [EC:6.1.1.20]	XF37_14550	-1.99847	2.65435e-06		phenylalanyl-tRNA synthetase
KKF81589.1	nickel transporter permease NikC	nikC	K15586	363.87	403	1.7e-121	nickel transport system permease protein	XF37_21505	-1.99877	0.000863512	nikC	nickel transporter permease NikC
KKF81544.1	hemin importer ATP-binding subunit	hmuV	K02013	259.73	313.6	5.5e-94	iron complex transport system ATP-binding protein [EC:7.2.2.-]	XF37_21270	-2.00211	0.00448766	hmuV	hemin importer ATP-binding subunit
KKF83409.1	cold-shock protein		K03704	85.93	125.2	1.1e-36	cold shock protein	XF37_12675	-2.0048	1.03428e-05		cold-shock protein
KKF80602.1	nucleoside triphosphate hydrolase		K08320	172.2	90.1	4e-26	(d)CTP diphosphatase [EC:3.6.1.65]	XF37_27845	-2.00495	5.81478e-05		nucleoside triphosphate hydrolase
KKF83612.1	LysR family transcriptional regulator		K21742	476.43	613.1	2.2e-185	LysR family transcriptional regulator, transcriptional activator for tt	XF37_12100	-2.00886	0.00184869		LysR family transcriptional regulator
KKF84448.1	hydrogenase		K06282	372.37	580	9.7e-175	hydrogenase small subunit [EC:1.12.99.6]	XF37_06680	-2.02045	0.000233034		hydrogenase
KKF85498.1	50S ribosomal protein L16		K02878	110	239.9	1.4e-71	large subunit ribosomal protein L16	XF37_01730	-2.02269	2.58816e-09		50S ribosomal protein L16
KKF85491.1	30S ribosomal protein S8		K02994	95.03	201.2	2.8e-60	small subunit ribosomal protein S8	XF37_01695	-2.03314	1.32659e-08		30S ribosomal protein S8
KKF81605.1	acyl carrier protein		K02078	42.03	66.2	1.1e-18	acyl carrier protein	XF37_21590	-2.03322	0.000362025		acyl carrier protein
KKF83231.1	cytochrome d ubiquinol oxidase subunit 2		K00426	38.1	426.4	3.8e-128	cytochrome bd ubiquinol oxidase subunit II [EC:7.1.1.7]	XF37_13365	-2.03538	1.1563e-09		cytochrome d ubiquinol oxidase subunit 2
KKF82745.1	aromatic amino acid exporter		K03298	161.57	53.9	4.4e-15	drug/metabolite transporter, DME family	XF37_16040	-2.04094	0.000963757		aromatic amino acid exporter
KKF83264.1	integrase		K21039	157.93	505.7	2.2e-152	enterobacteria phage integrase [EC:2.7.7.- 3.1.-.-]	XF37_13565	-2.04592	1.28654e-06		integrase
KKF81321.1	cytochrome C		K02569	288.17	340.2	1.6e-102	cytochrome c-type protein NapC	XF37_23195	-2.04734	0.000483593		cytochrome C
KKF85597.1	transcription termination factor Rho	rho	K03628	220.93	758.4	1.4e-228	transcription termination factor Rho	XF37_01295	-2.04868	4.47763e-10	rho	transcription termination factor Rho
KKF84952.1	hypothetical protein		K07733	30.4	84.8	2.6e-24	prophage regulatory protein	XF37_04400	-2.05071	0.0339879		hypothetical protein
KKF81205.1	nitrate reductase		K00374	64.83	277.4	6.6e-83	nitrate reductase gamma subunit [EC:1.7.5.1 1.7.99.-]	XF37_24135	-2.05516	0.000277112		nitrate reductase
KKF80604.1	DNA gyrase inhibitor		K09862	33.9	83.4	2.9e-24	uncharacterized protein	XF37_27855	-2.05694	0.0485974		DNA gyrase inhibitor
KKF82817.1	flagellar MS-ring protein	fliF	K02409	129.03	633.3	1.1e-190	flagellar M-ring protein FliF	XF37_15575	-2.05784	0.00188588	fliF	flagellar MS-ring protein
KKF85500.1	50S ribosomal protein L22		K02890	80.07	174.7	6.9e-52	large subunit ribosomal protein L22	XF37_01740	-2.05812	0.000163501		50S ribosomal protein L22
KKF81825.1	flagellar basal body L-ring protein	flgH	K02393	51.47	264.8	2.1e-79	flagellar L-ring protein FlgH	XF37_20745	-2.06023	0.00369569	flgH	flagellar basal body L-ring protein
KKF85111.1	hypothetical protein		K18235	137.6	41.2	3e-11	virginiamycin B lyase [EC:4.2.99.-]	XF37_02780	-2.06121	6.87794e-10		hypothetical protein
KKF82812.1	type III effector		K15353	786.07	105.9	4.7e-31	E3 ubiquitin-protein ligase SspH2	XF37_15545	-2.06265	0.000185622		type III effector
KKF82865.1	dimethyl sulfoxide reductase		K07311	438.7	429.1	1e-129	Tat-targeted selenate reductase subunit YnfG	XF37_13895	-2.06625	0.000961569		dimethyl sulfoxide reductase
KKF82200.1	muropeptide transporter	ampG	K08218	243.13	551.1	5.5e-166	MFS transporter, PAT family, beta-lactamase induction signal transducer	XF37_18725	-2.06675	0.000173235	ampG	muropeptide transporter
KKF82802.1	flagellin		K02406	128.3	337.9	2.5e-101	flagellin	XF37_15495	-2.06707	2.40522e-10		flagellin
KKF85488.1	30S ribosomal protein S5		K02988	142.43	245.1	3.8e-73	small subunit ribosomal protein S5	XF37_01680	-2.06979	3.55676e-08		30S ribosomal protein S5
KKF84912.1	enterobactin synthase subunit F	entF	K02364	1366.4	1757.2	0	enterobactin synthetase component F [EC:6.3.2.14]	XF37_05080	-2.07103	1.89332e-05	entF	enterobactin synthase subunit F
KKF85773.1	ATP synthase F0F1 subunit A		K02108	160.37	213.7	1.4e-63	F-type H+-transporting ATPase subunit a	XF37_00700	-2.07217	9.0607e-08		ATP synthase F0F1 subunit A
KKF84185.1	alkaline phosphatase		K09612	206.23	551.7	1.7e-166	alkaline phosphatase isozyme conversion protein [EC:3.4.11.-]	XF37_09190	-2.073	2.78853e-06		alkaline phosphatase
KKF85684.1	secretion protein EspG		K12785	558.43	743.6	1.4e-224	LEE-encoded effector EspG	XF37_00210	-2.08027	2.25885e-06		secretion protein EspG
KKF81587.1	nickel ABC transporter ATP-binding protein	nikE	K10824	304.6	360.8	1.2e-108	nickel transport system ATP-binding protein [EC:7.2.2.11]	XF37_21495	-2.08039	0.000502808	nikE	nickel ABC transporter ATP-binding protein
KKF84968.1	hypothetical protein		K09968	64.03	272.2	2.2e-81	uncharacterized protein	XF37_04480	-2.08573	1.32731e-05		hypothetical protein
KKF84846.1	apolipoprotein acyltransferase	lnt	K03820	159.43	464.9	1.5e-139	apolipoprotein N-acyltransferase [EC:2.3.1.269]	XF37_04725	-2.09013	5.51938e-06	lnt	apolipoprotein acyltransferase
KKF82381.1	glycerol uptake facilitator GlpF		K02440	269.43	304.4	2.2e-91	glycerol uptake facilitator protein	XF37_17550	-2.09138	1.47941e-06		glycerol uptake facilitator GlpF
KKF82579.1	protease		K08303	40.53	505.9	3.7e-152	putative protease [EC:3.4.-.-]	XF37_16965	-2.09154	0.000141259		protease
KKF81739.1	30S ribosomal protein S12		K02950	76.4	237.9	2.1e-71	small subunit ribosomal protein S12	XF37_22285	-2.09168	4.39336e-10		30S ribosomal protein S12
KKF82015.1	ribosomal protein S12 methylthiotransferase accessory factor YcaO		K09136	73.57	210.2	1.9e-62	ribosomal protein S12 methylthiotransferase accessory factor	XF37_19370	-2.093	2.1935e-06		ribosomal protein S12 methylthiotransferase accessory factor YcaO
KKF82435.1	alpha-glucosidase		K15922	489.73	1090.4	0	sulfoquinovosidase [EC:3.2.1.199]	XF37_17845	-2.09373	0.0287487		alpha-glucosidase
KKF82627.1	GDP-mannose 4,6-dehydratase		K01711	277.5	705.6	1.9e-212	GDPmannose 4,6-dehydratase [EC:4.2.1.47]	XF37_17210	-2.0938	2.94955e-08		GDP-mannose 4,6-dehydratase
KKF82607.1	acyl transferase		K03818	148.27	287.5	2.3e-86	putative colanic acid biosynthesis acetyltransferase WcaF [EC:2.3.1.-]	XF37_17110	-2.0954	0.000169684		acyl transferase
KKF82016.1	formate transporter		K06212	339.27	531.5	5.1e-160	formate transporter	XF37_19375	-2.09665	2.24272e-10		formate transporter
KKF81976.1	23S rRNA methyltransferase	rlmL	K12297	538.03	1087.5	0	23S rRNA (guanine2445-N2)-methyltransferase / 23S rRNA (guanine2069-N7)	XF37_19150	-2.09705	4.80582e-08	rlmL	23S rRNA methyltransferase
KKF82031.1	amino acid ABC transporter permease		K16013	491.13	692.8	1.6e-208	ATP-binding cassette, subfamily C, bacterial CydD	XF37_19450	-2.09884	2.88084e-05		amino acid ABC transporter permease
KKF80810.1	carbohydrate transporter		K11931	237.67	173.5	2e-51	poly-beta-1,6-N-acetyl-D-glucosamine N-deacetylase [EC:3.5.1.-]	XF37_26170	-2.09934	2.17235e-06		carbohydrate transporter
KKF85764.1	glucosamine--fructose-6-phosphate aminotransferase		K00820	183.17	848.3	2.1e-255	glutamine---fructose-6-phosphate transaminase (isomerizing) [EC:2.6.1.1	XF37_00655	-2.10115	3.90034e-09		glucosamine--fructose-6-phosphate aminotransferase
KKF84253.1	alkylhydroperoxidase		K04756	119.27	39.4	1e-10	lipoyl-dependent peroxiredoxin subunit D [EC:1.11.1.28]	XF37_09595	-2.10342	0.000528764		alkylhydroperoxidase
KKF84054.1	ornithine carbamoyltransferase		K09065	381.3	332.3	9.1e-100	N-acetylornithine carbamoyltransferase [EC:2.1.3.9]	XF37_08460	-2.10464	3.12258e-05		ornithine carbamoyltransferase
KKF85760.1	fimbrial protein		K07356	495.33	115.8	5.9e-34	fimbrial protein	XF37_00630	-2.10553	4.58415e-05		fimbrial protein
KKF80770.1	integrase		K21039	157.93	347.5	2.7e-104	enterobacteria phage integrase [EC:2.7.7.- 3.1.-.-]	XF37_26210	-2.1079	0.00386099		integrase
KKF82040.1	hypothetical protein		K09824	94.77	337	4.6e-101	uncharacterized protein	XF37_19500	-2.10939	6.50915e-05		hypothetical protein
KKF84804.1	hypothetical protein		K14479	236.3	37.9	3.9e-10	procyclin	XF37_05275	-2.11209	2.74214e-05		hypothetical protein
KKF85489.1	50S ribosomal protein L18		K02881	45.63	138.7	1.1e-40	large subunit ribosomal protein L18	XF37_01685	-2.11394	2.48392e-08		50S ribosomal protein L18
KKF83989.1	agmatinase		K01480	191.77	353.7	4e-106	agmatinase [EC:3.5.3.11]	XF37_08105	-2.11586	2.41052e-08		agmatinase
KKF80809.1	hypothetical protein		K19353	302.67	561.7	8.2e-169	heptose-I-phosphate ethanolaminephosphotransferase [EC:2.7.8.-]	XF37_26160	-2.1181	5.65553e-05		hypothetical protein
KKF82088.1	ribosomal protein S12 methylthiotransferase	rimO	K14441	442.8	722.3	1.8e-217	ribosomal protein S12 methylthiotransferase [EC:2.8.4.4]	XF37_19750	-2.12439	3.28147e-06	rimO	ribosomal protein S12 methylthiotransferase
KKF82514.1	pilus assembly protein		K07350	240.7	23.1	1.6e-05	minor fimbrial subunit	XF37_16630	-2.12561	0.00135798		pilus assembly protein
KKF84395.1	membrane protein		K07704	537.4	484.3	1.9e-145	two-component system, LytTR family, sensor histidine kinase LytS [EC:2.	XF37_07245	-2.12608	1.09622e-05		membrane protein
KKF81251.1	type VI secretion protein		K11901	139.07	191.7	5.1e-57	type VI secretion system protein ImpB	XF37_23710	-2.12635	0.00225519		type VI secretion protein
KKF81831.1	hypothetical protein		K02387	72.23	171.7	4.2e-51	flagellar basal-body rod protein FlgB	XF37_20775	-2.13097	0.000294857		hypothetical protein
KKF83154.1	dimethyl sulfoxide reductase		K07310	1681.8	1860.3	0	Tat-targeted selenate reductase subunit YnfF [EC:1.97.1.9]	XF37_13890	-2.1316	3.46024e-06		dimethyl sulfoxide reductase
KKF83236.1	colicin uptake protein TolR		K03560	157.53	135.2	7.9e-40	biopolymer transport protein TolR	XF37_13390	-2.13522	7.37629e-07		colicin uptake protein TolR
KKF82082.1	multidrug transporter		K08160	457.4	648.6	1.2e-195	MFS transporter, DHA1 family, multidrug/chloramphenicol efflux transpor	XF37_19715	-2.13535	3.10565e-08		multidrug transporter
KKF81028.1	peptide permease		K03305	307.53	397.2	4e-119	proton-dependent oligopeptide transporter, POT family	XF37_25090	-2.1415	0.000504199		peptide permease
KKF82441.1	GTP-binding protein TypA		K06207	375.57	1038.8	0	GTP-binding protein	XF37_17880	-2.14242	1.00807e-08		GTP-binding protein TypA
KKF85128.1	protease		K08303	40.53	446.7	3.1e-134	putative protease [EC:3.4.-.-]	XF37_02870	-2.14812	3.133e-05		protease
KKF83991.1	transketolase		K00615	236.4	855.1	2.2e-257	transketolase [EC:2.2.1.1]	XF37_08115	-2.14889	9.80922e-10		transketolase
KKF84242.1	transcriptional repressor MprA		K15974	117.4	236.7	9.4e-71	MarR family transcriptional regulator, negative regulator of the multid	XF37_09540	-2.14914	0.000786652		transcriptional repressor MprA
KKF85495.1	50S ribosomal protein L14		K02874	100.37	211.3	4.6e-63	large subunit ribosomal protein L14	XF37_01715	-2.15124	1.07664e-10		50S ribosomal protein L14
KKF84208.1	hydrogenase nickel incorporation protein HypB		K04652	185.67	421.6	5.9e-127	hydrogenase nickel incorporation protein HypB	XF37_09310	-2.15893	0.00704005		hydrogenase nickel incorporation protein HypB
KKF85756.1	phosphate transporter permease subunit PtsA	pstA	K02038	247.93	306	1.2e-91	phosphate transport system permease protein	XF37_00610	-2.16029	1.72173e-06	pstA	phosphate transporter permease subunit PtsA
KKF80605.1	hypothetical protein		K18778	129	309.2	7.7e-93	cell division protein ZapD	XF37_27860	-2.1611	0.000140449		hypothetical protein
KKF82201.1	cytochrome o ubiquinol oxidase subunit II		K02297	314.7	482.6	3.1e-145	cytochrome o ubiquinol oxidase subunit II [EC:7.1.1.3]	XF37_18730	-2.16303	8.44703e-12		cytochrome o ubiquinol oxidase subunit II
KKF83509.1	transcription elongation factor NusA	nusA	K02600	42	558.1	6e-168	transcription termination/antitermination protein NusA	XF37_11550	-2.16327	1.20008e-09	nusA	transcription elongation factor NusA
KKF80645.1	2-amino-4-hydroxy-6-hydroxymethyldihydropteridine pyrophosphokinase		K00950	40.63	219.5	1.6e-65	2-amino-4-hydroxy-6-hydroxymethyldihydropteridine diphosphokinase [EC:2	XF37_28060	-2.16595	4.95924e-06		2-amino-4-hydroxy-6-hydroxymethyldihydropteridine pyrophosphokinase
KKF84024.1	glycine cleavage system protein H		K02437	38.83	211.2	6.6e-63	glycine cleavage system H protein	XF37_08290	-2.17192	6.36379e-06		glycine cleavage system protein H
KKF83520.1	protease		K08303	40.53	34.3	3.1e-09	putative protease [EC:3.4.-.-]	XF37_11605	-2.17331	0.00034367		protease
KKF84449.1	hydrogenase		K06281	674.1	730.4	4.2e-220	hydrogenase large subunit [EC:1.12.99.6]	XF37_06685	-2.17465	0.00590673		hydrogenase
KKF80448.1	restriction endonuclease EcoAI subunit S		K01154	44.87	117.5	2.4e-34	type I restriction enzyme, S subunit [EC:3.1.21.3]	XF37_27000	-2.17701	7.39237e-07		restriction endonuclease EcoAI subunit S
KKF82962.1	transporter		K08174	210.4	102.1	7.4e-30	MFS transporter, FHS family, glucose/mannose:H+ symporter	XF37_14425	-2.17704	0.0111959		transporter
KKF84545.1	tRNA methyltransferase		K15256	110.47	327	5.7e-98	tRNA (cmo5U34)-methyltransferase [EC:2.1.1.-]	XF37_06480	-2.17883	0.000107286		tRNA methyltransferase
KKF85296.1	C4-dicarboxylate transporter		K11103	507.13	729.6	6.8e-220	aerobic C4-dicarboxylate transport protein	XF37_02575	-2.18049	9.20773e-11		C4-dicarboxylate transporter
KKF80696.1	proline--tRNA ligase		K01881	163.13	529.3	3.9e-159	prolyl-tRNA synthetase [EC:6.1.1.15]	XF37_28320	-2.18158	2.55348e-08		proline--tRNA ligase
KKF84871.1	LysR family transcriptional regulator		K05798	245.87	163.6	1.9e-48	LysR family transcriptional regulator, transcriptional activator for le	XF37_04865	-2.18192	0.00355423		LysR family transcriptional regulator
KKF81839.1	multidrug resistance protein MdtH		K08162	220.5	629.2	7.7e-190	MFS transporter, DHA1 family, multidrug resistance protein	XF37_20815	-2.18242	3.81218e-05		multidrug resistance protein MdtH
KKF84765.1	maltose transporter permease	malG	K10110	352.93	462.6	2e-139	maltose/maltodextrin transport system permease protein	XF37_05420	-2.18732	1.67177e-06	malG	maltose transporter permease
KKF84035.1	peptide chain release factor 2		K02836	368.3	513.1	2e-154	peptide chain release factor 2	XF37_08350	-2.18741	2.16163e-09		peptide chain release factor 2
KKF85348.1	type IV secretion protein Rhs		K11021	132.8	42.1	1.1e-11	insecticidal toxin complex protein TccC	XF37_02025	-2.18786	0.00455979		type IV secretion protein Rhs
KKF84911.1	O-antigen length regulator		K05789	243.93	213.7	1.2e-63	chain length determinant protein (polysaccharide antigen chain regulato	XF37_05075	-2.18789	0.00073282		O-antigen length regulator
KKF85494.1	50S ribosomal protein L24	rplX	K02895	40.6	115.7	8.7e-34	large subunit ribosomal protein L24	XF37_01710	-2.18914	4.4269e-08	rplX	50S ribosomal protein L24
KKF83235.1	colicin uptake protein TolQ		K03562	256.53	331.3	2.4e-99	biopolymer transport protein TolQ	XF37_13385	-2.19196	2.78632e-10		colicin uptake protein TolQ
KKF80453.1	GTP-binding protein		K02234	246.53	201.8	4.7e-60	cobalamin biosynthesis protein CobW	XF37_27025	-2.19243	5.09038e-06		GTP-binding protein
KKF83046.1	sugar kinase		K18478	262.5	172.4	3.8e-51	sulfofructose kinase [EC:2.7.1.184]	XF37_14865	-2.19318	0.000259017		sugar kinase
KKF82608.1	GDP-mannose 4,6-dehydratase		K01711	277.5	712.9	1.2e-214	GDPmannose 4,6-dehydratase [EC:4.2.1.47]	XF37_17115	-2.19404	6.98834e-06		GDP-mannose 4,6-dehydratase
KKF81011.1	transcriptional regulator		K03755	376.57	448.7	1.6e-135	AraC family transcriptional regulator, transcriptional activator of adi	XF37_25000	-2.19497	8.8166e-05		transcriptional regulator
KKF84647.1	guanosine kinase		K00892	550.9	870.1	7e-263	inosine kinase [EC:2.7.1.73]	XF37_06140	-2.19584	1.032e-07		guanosine kinase
KKF85770.1	ATP F0F1 synthase subunit delta		K02113	45.73	139.8	3.8e-41	F-type H+-transporting ATPase subunit delta	XF37_00685	-2.19747	9.89401e-10		ATP F0F1 synthase subunit delta
KKF85482.1	30S ribosomal protein S11		K02948	98.6	188.9	4.4e-56	small subunit ribosomal protein S11	XF37_01650	-2.1983	4.99885e-09		30S ribosomal protein S11
KKF82191.1	molecular chaperone		K03770	175.13	549.4	5.9e-165	peptidyl-prolyl cis-trans isomerase D [EC:5.2.1.8]	XF37_18680	-2.19979	1.51274e-08		molecular chaperone
KKF83800.1	membrane protein		K06077	38.37	89	1.7e-25	outer membrane lipoprotein SlyB	XF37_10180	-2.20179	1.14758e-06		membrane protein
KKF84608.1	hypothetical protein		K03699	322.57	388.2	2.5e-116	putative hemolysin	XF37_06375	-2.20424	3.77289e-05		hypothetical protein
KKF85333.1	hypothetical protein		K06400	153.1	177.2	1.8e-52	site-specific DNA recombinase	XF37_02435	-2.20635	0.00409809		hypothetical protein
KKF84211.1	formate hydrogenlyase subunit 3		K15828	690.2	1074.8	0	formate hydrogenlyase subunit 3	XF37_09335	-2.20714	0.0140453		formate hydrogenlyase subunit 3
KKF81873.1	antitoxin		K18838	54.77	203.8	2.2e-61	cytoskeleton bundling-enhancing protein CbeA and related proteins	XF37_21015	-2.2084	0.00922373		antitoxin
KKF81672.1	4-alpha-glucanotransferase	malQ	K00705	207.43	719.7	1.9e-216	4-alpha-glucanotransferase [EC:2.4.1.25]	XF37_21940	-2.20856	2.15339e-07	malQ	4-alpha-glucanotransferase
KKF85481.1	30S ribosomal protein S4		K02986	73.4	265.1	2.6e-79	small subunit ribosomal protein S4	XF37_01645	-2.21163	6.18307e-10		30S ribosomal protein S4
KKF84690.1	xanthine-guanine phosphoribosyltransferase		K00769	112.07	275.5	8.1e-83	xanthine phosphoribosyltransferase [EC:2.4.2.22]	XF37_05750	-2.21321	3.60225e-05		xanthine-guanine phosphoribosyltransferase
KKF82905.1	electron transporter RnfC		K03615	128.67	1086	0	Na+-translocating ferredoxin:NAD+ oxidoreductase subunit C [EC:7.2.1.2]	XF37_14105	-2.21335	3.91348e-05		electron transporter RnfC
KKF81865.1	curli assembly protein CsgF		K04338	58.33	157.3	8.3e-47	curli production assembly/transport component CsgF	XF37_20960	-2.21352	1.00962e-06		curli assembly protein CsgF
KKF81411.1	cytochrome C biogenesis protein CcmA		K02193	195.37	310.6	4.1e-93	heme exporter protein A [EC:7.6.2.5]	XF37_23200	-2.21561	0.000457816		cytochrome C biogenesis protein CcmA
KKF81521.1	ABC transporter ATPase		K10938	187.67	314.5	1.1e-94	accessory colonization factor AcfC	XF37_22365	-2.21683	2.02438e-07		ABC transporter ATPase
KKF80542.1	crotonobetainyl-CoA:carnitine CoA-transferase	caiC	K02182	503.97	629.7	2e-189	carnitine-CoA ligase [EC:6.2.1.48]	XF37_27525	-2.21707	7.09972e-05	caiC	crotonobetainyl-CoA:carnitine CoA-transferase
KKF84036.1	lysine--tRNA ligase	lysS	K04567	323.2	800	1.3e-240	lysyl-tRNA synthetase, class II [EC:6.1.1.6]	XF37_08355	-2.21766	3.69999e-10	lysS	lysine--tRNA ligase
KKF80343.1	50S ribosomal protein L1		K02863	95.77	330.8	3.2e-99	large subunit ribosomal protein L1	XF37_28455	-2.22594	9.06778e-08		50S ribosomal protein L1
KKF81872.1	toxin		K18837	46.63	224.9	8.2e-68	cytoskeleton-binding toxin CbtA and related proteins	XF37_21010	-2.23734	0.00285761		toxin
KKF81849.1	sulfurtransferase		K07146	181.23	353.6	6.4e-106	UPF0176 protein	XF37_20865	-2.2394	4.13791e-05		sulfurtransferase
KKF81354.1	PTS system fructose-specific transporter subunits IIBC		K02770	605.73	681.8	3.7e-205	fructose PTS system EIIBC or EIIC component [EC:2.7.1.202]	XF37_23370	-2.24213	2.06302e-08		PTS system fructose-specific transporter subunits IIBC
KKF82844.1	histidine kinase		K07644	395.47	359.3	1.3e-107	two-component system, OmpR family, heavy metal sensor histidine kinase	XF37_15720	-2.24232	1.70066e-05		histidine kinase
KKF80410.1	integrase		K07357	264.2	302.6	3.1e-91	type 1 fimbriae regulatory protein FimB	XF37_26785	-2.24693	8.4141e-07		integrase
KKF84382.1	nucleoside permease		K11535	541.5	635.9	7.4e-192	nucleoside transport protein	XF37_07180	-2.24701	2.09261e-08		nucleoside permease
KKF85501.1	30S ribosomal protein S19		K02965	103.8	168.1	3.9e-50	small subunit ribosomal protein S19	XF37_01745	-2.24942	2.85504e-07		30S ribosomal protein S19
KKF84914.1	enterobactin esterase		K07214	249.83	647.5	5.5e-195	iron(III)-enterobactin esterase [EC:3.1.1.108]	XF37_05090	-2.25273	0.000790873		enterobactin esterase
KKF85378.1	ADP-heptose--LPS heptosyltransferase		K02841	257.77	458.6	7.3e-138	heptosyltransferase I [EC:2.4.-.-]	XF37_02175	-2.25683	5.47846e-06		ADP-heptose--LPS heptosyltransferase
KKF84711.1	acyltransferase		K03830	71.7	147	2.2e-43	putative acetyltransferase [EC:2.3.1.-]	XF37_05770	-2.25808	0.021929		acyltransferase
KKF81679.1	ferrous iron transporter B	feoB	K04759	102.97	849.4	8.9e-256	ferrous iron transport protein B	XF37_21975	-2.26106	2.12641e-05	feoB	ferrous iron transporter B
KKF84423.1	integrase		K14059	184.6	99.4	1.1e-28	integrase	XF37_07400	-2.26155	0.000142124		integrase
KKF80543.1	crotonobetainyl-CoA:carnitine CoA-transferase		K08298	439.3	714.3	1.1e-215	L-carnitine CoA-transferase [EC:2.8.3.21]	XF37_27530	-2.26387	1.54403e-06		crotonobetainyl-CoA:carnitine CoA-transferase
KKF81288.1	glycerophosphodiester phosphodiesterase	glpQ	K01126	133.43	226.9	1.4e-67	glycerophosphoryl diester phosphodiesterase [EC:3.1.4.46]	XF37_23015	-2.26651	6.68514e-07	glpQ	glycerophosphodiester phosphodiesterase
KKF81170.1	molybdenum transport protein ModD		K03813	257	369.8	2e-111	molybdenum transport protein [EC:2.4.2.-]	XF37_23940	-2.26712	0.00176278		molybdenum transport protein ModD
KKF81312.1	malate:quinone oxidoreductase		K00116	183.77	819.7	3e-247	malate dehydrogenase (quinone) [EC:1.1.5.4]	XF37_23150	-2.27003	1.92985e-08		malate:quinone oxidoreductase
KKF83998.1	ABC transporter ATP-binding protein		K01552	405.7	217	1.5e-64	energy-coupling factor transport system ATP-binding protein [EC:3.6.3.-	XF37_08150	-2.27152	0.000216944		ABC transporter ATP-binding protein
KKF81715.1	transporter		K06141	186.47	577.7	2.8e-174	MFS transporter, TsgA protein	XF37_22165	-2.27454	0.00017712		transporter
KKF83561.1	transcriptional regulator		K07592	310.7	548.8	8.9e-166	LysR family transcriptional regulator, tdc operon transcriptional activ	XF37_11815	-2.27706	0.000412312		transcriptional regulator
KKF80353.1	thiamine-phosphate pyrophosphorylase		K14153	361.23	310.9	6.2e-93	hydroxymethylpyrimidine kinase / phosphomethylpyrimidine kinase / thiam	XF37_28505	-2.27813	0.000255337		thiamine-phosphate pyrophosphorylase
KKF81912.1	hypothetical protein		K19353	302.67	599.6	2.9e-180	heptose-I-phosphate ethanolaminephosphotransferase [EC:2.7.8.-]	XF37_20280	-2.27916	1.89697e-08		hypothetical protein
KKF84053.1	diaminopropionate ammonia-lyase		K01751	260.73	520	2.2e-156	diaminopropionate ammonia-lyase [EC:4.3.1.15]	XF37_08455	-2.28049	2.72736e-05		diaminopropionate ammonia-lyase
KKF81055.1	transporter		K20265	209.3	206.8	1.6e-61	glutamate:GABA antiporter	XF37_25235	-2.28207	1.53336e-06		transporter
KKF81712.1	nitrite transporter NirC		K02598	238.07	343.3	2.3e-103	nitrite transporter	XF37_22150	-2.28386	0.000372164		nitrite transporter NirC
KKF84206.1	hydrogenase isoenzymes formation protein HypD		K04654	200.4	566.2	1e-170	hydrogenase expression/formation protein HypD	XF37_09300	-2.28552	7.6006e-05		hydrogenase isoenzymes formation protein HypD
KKF81093.1	primosomal replication protein N		K02686	41.87	128.7	1.9e-38	primosomal replication protein N	XF37_25450	-2.28899	6.11942e-10		primosomal replication protein N
KKF81346.1	membrane protein		K19803	116.87	348.1	7.9e-105	Kdo2-lipid A phosphotransferase [EC:2.7.4.29]	XF37_23330	-2.29258	3.19209e-05		membrane protein
KKF81315.1	ferredoxin		K02572	122.03	213.4	1.5e-63	ferredoxin-type protein NapF	XF37_23165	-2.29317	0.00302204		ferredoxin
KKF85382.1	lipopolysaccharide biosynthesis protein		K02850	130.23	269.1	9.7e-81	heptose II phosphotransferase [EC:2.7.1.-]	XF37_02195	-2.29603	1.76477e-05		lipopolysaccharide biosynthesis protein
KKF82705.1	secretion protein EspO		K13793	101.7	162.6	5.3e-49	secreted effector OspE	XF37_16230	-2.29784	2.5684e-06		secretion protein EspO
KKF81680.1	ferrous iron transporter A	feoA	K04758	38.9	64.6	3.9e-18	ferrous iron transport protein A	XF37_21980	-2.30037	2.04577e-07	feoA	ferrous iron transporter A
KKF84817.1	potassium-transporting ATPase subunit A		K01546	187.13	915.6	5.2e-276	potassium-transporting ATPase potassium-binding subunit	XF37_04535	-2.30669	0.00959786		potassium-transporting ATPase subunit A
KKF80449.1	restriction endonuclease EcoEI subunit M		K03427	124.27	365.6	1.8e-109	type I restriction enzyme M protein [EC:2.1.1.72]	XF37_27005	-2.30721	6.46155e-07		restriction endonuclease EcoEI subunit M
KKF83695.1	ribosome maturation protein RimP		K09748	26.9	218.8	3.8e-65	ribosome maturation factor RimP	XF37_11545	-2.3093	3.61854e-11		ribosome maturation protein RimP
KKF81768.1	tail protein		K06907	142.93	227.2	8.5e-68	uncharacterized protein	XF37_21095	-2.31137	0.0016275		tail protein
KKF80369.1	urease subunit gamma	ureA	K01430	155.53	174	2e-52	urease subunit gamma [EC:3.5.1.5]	XF37_28395	-2.31428	1.80064e-07	ureA	urease subunit gamma
KKF81828.1	flagellar hook protein FlgE	flgE	K02390	180.9	472.1	1.1e-141	flagellar hook protein FlgE	XF37_20760	-2.32163	6.66218e-05	flgE	flagellar hook protein FlgE
KKF81758.1	DNA packaging protein		K22014	74.6	74.8	2.4e-21	terminase small subunit / prophage DNA-packing protein	XF37_21210	-2.32611	0.0205931		DNA packaging protein
KKF81440.1	gene expression modulator		K05839	43.07	115.3	6.7e-34	haemolysin expression modulating protein	XF37_22810	-2.33235	0.000989242		gene expression modulator
KKF85492.1	30S ribosomal protein S14	rpsN	K02954	24.43	134.7	1e-39	small subunit ribosomal protein S14	XF37_01700	-2.33452	2.24272e-10	rpsN	30S ribosomal protein S14
KKF80799.1	spermidine/putrescine ABC transporter permease	potB	K11071	281.43	390.6	1.6e-117	spermidine/putrescine transport system permease protein	XF37_26365	-2.34411	0.000587191	potB	spermidine/putrescine ABC transporter permease
KKF81454.1	DDE endonuclease		K07494	67.13	195.2	5.2e-58	putative transposase	XF37_22690	-2.34729	2.99937e-08		DDE endonuclease
KKF82825.1	flagellar motor switch protein FliN	fliN	K02417	65.07	170.6	1.6e-50	flagellar motor switch protein FliN	XF37_15615	-2.3488	0.000222168	fliN	flagellar motor switch protein FliN
KKF81555.1	arsenate reductase		K00537	94.93	196.2	2.2e-58	arsenate reductase (glutaredoxin) [EC:1.20.4.1]	XF37_21330	-2.35096	0.000254496		arsenate reductase
KKF85662.1	hypothetical protein		K12788	310.87	322.7	1e-97	LEE-encoded effector EspH	XF37_00085	-2.36023	1.18807e-05		hypothetical protein
KKF84072.1	type III secretion system protein SpaS		K22510	369.43	534	5.7e-161	type III secretion system export apparatus switch protein	XF37_08575	-2.36209	0.0017026		type III secretion system protein SpaS
KKF82023.1	dimethyl sulfoxide reductase		K07311	438.7	415.6	1.3e-125	Tat-targeted selenate reductase subunit YnfG	XF37_19410	-2.36501	0.00028394		dimethyl sulfoxide reductase
KKF81452.1	cytotoxin		K11063	4353.1	36.2	2.5e-10	toxin A/B	XF37_22680	-2.36693	6.99785e-05		cytotoxin
KKF85490.1	50S ribosomal protein L6		K02933	110.97	260.2	7.3e-78	large subunit ribosomal protein L6	XF37_01690	-2.36758	5.21284e-12		50S ribosomal protein L6
KKF81602.1	hydroxymyristoyl-ACP dehydratase		K02372	68	35.4	3e-09	3-hydroxyacyl-[acyl-carrier-protein] dehydratase [EC:4.2.1.59]	XF37_21570	-2.37253	0.00123779		hydroxymyristoyl-ACP dehydratase
KKF84510.1	acyl carrier protein		K02078	42.03	49.7	1.3e-13	acyl carrier protein	XF37_07035	-2.37404	0.0217931		acyl carrier protein
KKF81421.1	bifunctional enterobactin receptor/adhesin protein		K16089	455.2	566.5	3.2e-170	outer membrane receptor for ferrienterochelin and colicins	XF37_22905	-2.37657	1.2776e-07		bifunctional enterobactin receptor/adhesin protein
KKF82804.1	flagellar protein FliS	fliS	K02422	29.43	137.3	1.6e-40	flagellar secretion chaperone FliS	XF37_15505	-2.37732	5.91742e-07	fliS	flagellar protein FliS
KKF80671.1	elongation factor Ts	tsf	K02357	119.67	367.2	7.1e-110	elongation factor Ts	XF37_28195	-2.37875	4.2977e-08	tsf	elongation factor Ts
KKF84506.1	hemolysin		K07326	467.6	428.6	1.1e-128	hemolysin activation/secretion protein	XF37_07015	-2.37888	3.96849e-06		hemolysin
KKF84515.1	ABC transporter		K02003	285.93	306.7	6.5e-92	putative ABC transport system ATP-binding protein	XF37_07060	-2.38084	0.000233034		ABC transporter
KKF81516.1	cytochrome O ubiquinol oxidase		K07484	14.6	58.6	2.3e-16	transposase	XF37_22440	-2.38791	0.00117895		cytochrome O ubiquinol oxidase
KKF85678.1	type III secretory protein EscS		K03227	94.77	110.1	1.1e-32	type III secretion protein S	XF37_00175	-2.39085	0.0242774		type III secretory protein EscS
KKF80742.1	autotransporter		K12684	707.6	1160.4	0	serine protease autotransporter [EC:3.4.21.-]	XF37_26510	-2.39375	1.14958e-12		autotransporter
KKF84905.1	isochorismate synthase		K02361	345.33	452.6	4.9e-136	isochorismate synthase [EC:5.4.4.2]	XF37_05045	-2.39719	0.000534764		isochorismate synthase
KKF82624.1	flippase		K03328	239.73	42.1	1.4e-11	polysaccharide transporter, PST family	XF37_17195	-2.39851	1.56699e-07		flippase
KKF84201.1	serine/threonine protein phosphatase		K07314	300.93	369.7	1.6e-111	serine/threonine protein phosphatase 2 [EC:3.1.3.16]	XF37_09275	-2.39913	6.41641e-05		serine/threonine protein phosphatase
KKF85735.1	hypothetical protein		K08998	29.13	131.6	7.7e-39	uncharacterized protein	XF37_00495	-2.40126	2.7839e-06		hypothetical protein
KKF82436.1	membrane protein		K03292	330.3	412.7	6.1e-124	glycoside/pentoside/hexuronide:cation symporter, GPH family	XF37_17850	-2.40438	0.00864438		membrane protein
KKF85758.1	phosphate ABC transporter substrate-binding protein		K02040	58.47	234.5	9.1e-70	phosphate transport system substrate-binding protein	XF37_00620	-2.40439	2.65717e-08		phosphate ABC transporter substrate-binding protein
KKF81742.1	hypothetical protein		K07507	36.07	219	3.2e-65	putative Mg2+ transporter-C (MgtC) family protein	XF37_21265	-2.40494	1.19859e-08		hypothetical protein
KKF85757.1	phosphate transporter permease subunit PstC	pstC	K02037	259.17	352.3	2e-105	phosphate transport system permease protein	XF37_00615	-2.40595	1.84836e-06	pstC	phosphate transporter permease subunit PstC
KKF81556.1	arsenical pump membrane protein		K03893	187.57	584	9.5e-176	arsenical pump membrane protein	XF37_21335	-2.41151	0.00198994		arsenical pump membrane protein
KKF81308.1	thiamine biosynthesis protein ApbE		K03734	45.53	320.7	5.2e-96	FAD:protein FMN transferase [EC:2.7.1.180]	XF37_23130	-2.41766	1.90004e-05		thiamine biosynthesis protein ApbE
KKF85502.1	50S ribosomal protein L2		K02886	167.77	380.9	2.2e-114	large subunit ribosomal protein L2	XF37_01750	-2.42184	5.33034e-08		50S ribosomal protein L2
KKF84672.1	excinuclease ABC subunit C	uvrC	K03703	243.3	761	4.3e-229	excinuclease ABC subunit C	XF37_05930	-2.42245	3.10658e-07	uvrC	excinuclease ABC subunit C
KKF81826.1	flagellar basal body rod protein FlgG	flgG	K02392	297.5	392.7	4.5e-118	flagellar basal-body rod protein FlgG	XF37_20750	-2.42372	1.71575e-05	flgG	flagellar basal body rod protein FlgG
KKF80723.1	transposase		K07483	42.1	53.2	9.6e-15	transposase	XF37_26555	-2.42451	0.0267534		transposase
KKF82450.1	acyltransferase		K13513	286.8	113.6	3.5e-33	lysocardiolipin and lysophospholipid acyltransferase [EC:2.3.1.- 2.3.1.	XF37_17935	-2.42504	1.63921e-05		acyltransferase
KKF83809.1	uracil transporter		K02824	475.53	593.4	1e-178	uracil permease	XF37_10225	-2.42654	1.32469e-06		uracil transporter
KKF83969.1	L-asparaginase II	ansB	K05597	527.67	411	1e-123	glutamin-(asparagin-)ase [EC:3.5.1.38]	XF37_08000	-2.42963	6.99657e-07	ansB	L-asparaginase II
KKF81099.1	heme lyase subunit NrfE		K04016	773.13	917.3	1.1e-276	cytochrome c-type biogenesis protein NrfE	XF37_24775	-2.43695	3.05745e-05		heme lyase subunit NrfE
KKF81740.1	30S ribosomal protein S7		K02992	112.3	242.1	1.6e-72	small subunit ribosomal protein S7	XF37_22290	-2.43914	2.93034e-09		30S ribosomal protein S7
KKF84140.1	serine dehydratase		K01752	89.87	702.7	2e-211	L-serine dehydratase [EC:4.3.1.17]	XF37_08940	-2.44177	5.77577e-06		serine dehydratase
KKF80474.1	peptide chain release factor 3	prfC	K02837	486.4	846.9	1.7e-255	peptide chain release factor 3	XF37_27150	-2.44406	7.30427e-09	prfC	peptide chain release factor 3
KKF83227.1	methylaspartate mutase		K01846	102.3	182.4	1.1e-54	methylaspartate mutase sigma subunit [EC:5.4.99.1]	XF37_13340	-2.4482	0.00598713		methylaspartate mutase
KKF85776.1	tRNA uridine 5-carboxymethylaminomethyl modification protein	gidA	K03495	295.43	1025	0	tRNA uridine 5-carboxymethylaminomethyl modification enzyme	XF37_00715	-2.44884	4.53705e-09	gidA	tRNA uridine 5-carboxymethylaminomethyl modification protein
KKF85493.1	50S ribosomal protein L5		K02931	103.77	333.5	4.9e-100	large subunit ribosomal protein L5	XF37_01705	-2.45103	1.82968e-11		50S ribosomal protein L5
KKF82803.1	flagellar capping protein	fliD	K02407	80.8	382.6	1.1e-114	flagellar hook-associated protein 2	XF37_15500	-2.45322	4.55787e-08	fliD	flagellar capping protein
KKF84165.1	oxidoreductase		K00065	332.67	330.3	3.8e-99	2-dehydro-3-deoxy-D-gluconate 5-dehydrogenase [EC:1.1.1.127]	XF37_09080	-2.45606	0.00531122		oxidoreductase
KKF82511.1	hypothetical protein		K07345	95.87	60.9	5.3e-17	major type 1 subunit fimbrin (pilin)	XF37_16615	-2.45627	1.72459e-05		hypothetical protein
KKF85698.1	histidine kinase		K20263	389.43	311	6.7e-93	two-component system, NarL family, sensor histidine kinase FusK [EC:2.7	XF37_00295	-2.45982	0.000748597		histidine kinase
KKF81983.1	fimbrial protein		K07353	387.33	249.3	7.5e-75	fimbrial chaperone protein	XF37_19195	-2.46025	0.0127646		fimbrial protein
KKF81204.1	nitrate reductase	narH	K00371	267.77	935.1	8e-282	nitrate reductase / nitrite oxidoreductase, beta subunit [EC:1.7.5.1 1.	XF37_24130	-2.46144	0.00023564	narH	nitrate reductase
KKF82382.1	glycerol kinase	glpK	K00864	529.7	864.5	1.9e-260	glycerol kinase [EC:2.7.1.30]	XF37_17555	-2.46417	4.26884e-10	glpK	glycerol kinase
KKF84001.1	DNA-binding protein		K06934	42.57	159.3	3.5e-47	uncharacterized protein	XF37_08170	-2.4668	4.89856e-05		DNA-binding protein
KKF82017.1	pyruvate formate-lyase		K00656	738.47	1159.2	0	formate C-acetyltransferase [EC:2.3.1.54]	XF37_19380	-2.46917	5.86805e-12		pyruvate formate-lyase
KKF85505.1	50S ribosomal protein L3		K02906	112.7	359.7	9e-108	large subunit ribosomal protein L3	XF37_01765	-2.47179	2.01412e-10		50S ribosomal protein L3
KKF84061.1	hypothetical protein		K07190	693.5	31.7	9.8e-09	phosphorylase kinase alpha/beta subunit	XF37_08500	-2.48142	0.000107112		hypothetical protein
KKF83521.1	protease		K08303	40.53	339.5	1e-101	putative protease [EC:3.4.-.-]	XF37_11610	-2.48991	8.70283e-05		protease
KKF81203.1	nitrate reductase	narZ	K00370	777.47	2256	0	nitrate reductase / nitrite oxidoreductase, alpha subunit [EC:1.7.5.1 1	XF37_24125	-2.49282	2.00538e-05	narZ	nitrate reductase
KKF85275.1	orotidine 5'-phosphate decarboxylase		K01591	127.37	259.3	2.4e-77	orotidine-5'-phosphate decarboxylase [EC:4.1.1.23]	XF37_03470	-2.49931	1.45679e-05		orotidine 5'-phosphate decarboxylase
KKF80376.1	urease accessory protein UreD		K03190	63.97	209.1	4.2e-62	urease accessory protein	XF37_28400	-2.50401	5.99422e-08		urease accessory protein UreD
KKF84687.1	porin		K11929	506.63	558	3.4e-168	outer membrane pore protein E	XF37_05735	-2.505	0.0029358		porin
KKF85769.1	ATP F0F1 synthase subunit alpha		K02111	438.43	841.4	2.7e-253	F-type H+/Na+-transporting ATPase subunit alpha [EC:7.1.2.2 7.2.2.1]	XF37_00680	-2.50544	2.06491e-11		ATP F0F1 synthase subunit alpha
KKF82697.1	hypothetical protein		K06940	31.53	40.9	4.4e-11	uncharacterized protein	XF37_16300	-2.50581	0.000519208		hypothetical protein
KKF81349.1	elongation factor P		K02356	89.93	258.3	1.6e-77	elongation factor P	XF37_23345	-2.50637	8.5993e-07		elongation factor P
KKF83567.1	serine dehydratase		K01752	89.87	714.7	4.9e-215	L-serine dehydratase [EC:4.3.1.17]	XF37_11845	-2.50881	3.24305e-06		serine dehydratase
KKF81327.1	thiol:disulfide interchange protein DsbE		K02199	76.57	241.7	2.1e-72	cytochrome c biogenesis protein CcmG, thiol:disulfide interchange prote	XF37_23230	-2.50975	0.0105284		thiol:disulfide interchange protein DsbE
KKF83541.1	hypothetical protein		K10985	321.67	355.7	4.5e-107	galactosamine PTS system EIIC component	XF37_11710	-2.51492	0.00590673		hypothetical protein
KKF81138.1	elongation factor Tu	tuf	K02358	364.53	247.6	9.4e-74	elongation factor Tu	XF37_24475	-2.51675	1.88643e-10	tuf	elongation factor Tu
KKF82268.1	hypothetical protein		K21740	84.83	137.4	3.7e-41	reactive chlorine resistance protein B	XF37_18125	-2.51717	0.00133276		hypothetical protein
KKF83230.1	cytochrome d terminal oxidase subunit 1		K00425	72.87	639.7	1.4e-192	cytochrome bd ubiquinol oxidase subunit I [EC:7.1.1.7]	XF37_13360	-2.52203	2.38119e-11		cytochrome d terminal oxidase subunit 1
KKF83656.1	hypothetical protein		K04034	228.57	69	1e-19	anaerobic magnesium-protoporphyrin IX monomethyl ester cyclase [EC:1.21	XF37_12325	-2.52206	1.15338e-08		hypothetical protein
KKF84566.1	transcriptional regulator		K02402	93.67	292.7	9.4e-88	flagellar transcriptional activator FlhC	XF37_06585	-2.5221	5.02862e-07		transcriptional regulator
KKF85383.1	lipopolysaccharide 1,3-galactosyltransferase		K03275	287.13	349.7	6.8e-105	UDP-glucose:(glucosyl)LPS alpha-1,3-glucosyltransferase [EC:2.4.1.-]	XF37_02200	-2.52567	2.74152e-05		lipopolysaccharide 1,3-galactosyltransferase
KKF83923.1	PTS system trehalose(maltose)-specific transporter subunits IIBC		K02819	618.5	726.4	6.7e-219	trehalose PTS system EIIBC or EIIBCA component [EC:2.7.1.201]	XF37_10845	-2.529	3.82501e-07		PTS system trehalose(maltose)-specific transporter subunits IIBC
KKF80342.1	50S ribosomal protein L11		K02867	76.4	247.8	3.2e-74	large subunit ribosomal protein L11	XF37_28450	-2.52909	4.13808e-10		50S ribosomal protein L11
KKF82628.1	fucose synthetase		K02377	214.6	506.9	1.2e-152	GDP-L-fucose synthase [EC:1.1.1.271]	XF37_17215	-2.54019	9.97825e-11		fucose synthetase
KKF82821.1	flagellar biosynthesis chaperone	fliJ	K02413	33.83	99.3	9.6e-29	flagellar protein FliJ	XF37_15595	-2.54066	0.0137544	fliJ	flagellar biosynthesis chaperone
KKF85526.1	hypothetical protein		K18189	85.37	164.9	5.8e-49	translational activator of cytochrome c oxidase 1	XF37_01475	-2.55033	3.55676e-08		hypothetical protein
KKF84546.1	tRNA methyltransferase		K15257	116.5	386.1	6.2e-116	tRNA (mo5U34)-methyltransferase [EC:2.1.1.-]	XF37_06485	-2.55686	7.08675e-06		tRNA methyltransferase
KKF80624.1	spermidine synthase		K00797	106.77	315.9	1.4e-94	spermidine synthase [EC:2.5.1.16]	XF37_27955	-2.56203	2.71521e-10		spermidine synthase
KKF84567.1	hypothetical protein		K02403	40	177.7	7.1e-53	flagellar transcriptional activator FlhD	XF37_06590	-2.56704	2.66675e-06		hypothetical protein
KKF84763.1	sugar ABC transporter substrate-binding protein	malE	K10108	378	702.2	5.2e-212	maltose/maltodextrin transport system substrate-binding protein	XF37_05410	-2.57841	2.09588e-12	malE	sugar ABC transporter substrate-binding protein
KKF81202.1	nitrate/nitrite transporter NarK		K02575	163.53	440.8	2e-132	MFS transporter, NNP family, nitrate/nitrite transporter	XF37_24120	-2.57888	8.56474e-06		nitrate/nitrite transporter NarK
KKF80672.1	uridylate kinase		K09903	86.83	367.9	1.5e-110	uridylate kinase [EC:2.7.4.22]	XF37_28200	-2.58005	5.83207e-08		uridylate kinase
KKF82629.1	GDP-mannose mannosyl hydrolase		K03207	113.5	222.4	7.9e-67	colanic acid biosynthesis protein WcaH [EC:3.6.1.-]	XF37_17220	-2.58672	1.1567e-08		GDP-mannose mannosyl hydrolase
KKF80523.1	molecular chaperone		K15540	268.73	225.6	2.2e-67	chaperone protein EcpD	XF37_27425	-2.59269	0.000235391		molecular chaperone
KKF81027.1	lysine--tRNA ligase	lysS	K04567	323.2	806.6	1.4e-242	lysyl-tRNA synthetase, class II [EC:6.1.1.6]	XF37_25085	-2.59534	9.79395e-07	lysS	lysine--tRNA ligase
KKF85503.1	50S ribosomal protein L23	rplW	K02892	58.33	95	2.1e-27	large subunit ribosomal protein L23	XF37_01755	-2.59945	2.14227e-10	rplW	50S ribosomal protein L23
KKF85294.1	c-di-GMP phosphodiesterase		K21086	116.23	346.2	2.4e-104	c-di-GMP phosphodiesterase [EC:3.1.4.52]	XF37_02555	-2.60211	6.29592e-05		c-di-GMP phosphodiesterase
KKF81285.1	glycerol-3-phosphate dehydrogenase		K00112	124.33	539.5	2.1e-162	glycerol-3-phosphate dehydrogenase subunit B [EC:1.1.5.3]	XF37_23000	-2.60948	0.000160842		glycerol-3-phosphate dehydrogenase
KKF83960.1	ornithine decarboxylase		K01584	764.37	502.4	8.1e-151	arginine decarboxylase [EC:4.1.1.19]	XF37_07955	-2.61219	1.81379e-07		ornithine decarboxylase
KKF84927.1	copper-binding protein		K07810	94.17	112.9	4e-33	Cu(I)/Ag(I) efflux system periplasmic protein CusF	XF37_05165	-2.61668	0.00281767		copper-binding protein
KKF84066.1	type III secretion system protein InvA		K03230	745.77	828.7	2.6e-249	type III secretion protein V	XF37_08525	-2.6178	1.59274e-05		type III secretion system protein InvA
KKF81009.1	hydrolase		K03760	374.63	765.4	1.4e-230	lipid A ethanolaminephosphotransferase [EC:2.7.8.43]	XF37_24990	-2.62263	1.58799e-07		hydrolase
KKF85675.1	lytic transglycosylase		K18377	297	93.1	6.3e-27	lysozyme-related protein Hpa2	XF37_00160	-2.62279	0.0105582		lytic transglycosylase
KKF83788.1	nucleoside diphosphate kinase		K00940	143.13	203.1	2.2e-60	nucleoside-diphosphate kinase [EC:2.7.4.6]	XF37_10115	-2.62445	2.0274e-08		nucleoside diphosphate kinase
KKF81077.1	membrane protein		K08989	38.67	169.2	1.4e-50	putative membrane protein	XF37_25365	-2.62709	0.000233034		membrane protein
KKF83263.1	acyl-CoA thioesterase		K01051	73.37	146	3.6e-43	pectinesterase [EC:3.1.1.11]	XF37_13560	-2.62806	1.49393e-05		acyl-CoA thioesterase
KKF85657.1	Intimin		K12790	1932.43	2074.4	0	intimin	XF37_00060	-2.63348	1.38217e-05		Intimin
KKF80767.1	endodeoxyribonuclease		K01160	33.7	121.4	1.7e-35	crossover junction endodeoxyribonuclease RusA [EC:3.1.22.4]	XF37_26400	-2.63394	0.000340722		endodeoxyribonuclease
KKF82267.1	membrane protein		K21741	92.6	236.5	5.4e-71	reactive chlorine resistance protein C	XF37_18120	-2.6422	0.00537002		membrane protein
KKF80846.1	adhesin	fimH	K07356	495.33	531.6	1.9e-160	fimbrial protein	XF37_26095	-2.64372	0.0115935	fimH	adhesin
KKF80479.1	hypothetical protein		K04069	116.6	189	3.4e-56	pyruvate formate lyase activating enzyme [EC:1.97.1.4]	XF37_27175	-2.65175	0.000372203		hypothetical protein
KKF84759.1	maltose-binding protein		K05775	92.57	445.2	3.4e-134	maltose operon periplasmic protein	XF37_05390	-2.65253	2.33616e-09		maltose-binding protein
KKF81588.1	nickel ABC transporter ATP-binding protein	nikD	K15587	331.53	346.8	4.1e-104	nickel transport system ATP-binding protein [EC:7.2.2.11]	XF37_21500	-2.65416	0.00135077	nikD	nickel ABC transporter ATP-binding protein
KKF85473.1	16S rRNA methyltransferase		K03500	307.73	530.9	2.1e-159	16S rRNA (cytosine967-C5)-methyltransferase [EC:2.1.1.176]	XF37_01605	-2.65694	3.18712e-07		16S rRNA methyltransferase
KKF83824.1	hydrogenase-4 F-S subunit		K12136	272.2	279.2	4.5e-84	hydrogenase-4 component A [EC:1.-.-.-]	XF37_10305	-2.66151	0.00383144		hydrogenase-4 F-S subunit
KKF83808.1	uracil phosphoribosyltransferase	upp	K00761	255.47	273	7.4e-82	uracil phosphoribosyltransferase [EC:2.4.2.9]	XF37_10220	-2.66759	2.39787e-08	upp	uracil phosphoribosyltransferase
KKF85381.1	glucosyltransferase		K03276	369.03	334.5	1.8e-100	UDP-glucose/galactose:(glucosyl)LPS alpha-1,2-glucosyl/galactosyltransf	XF37_02190	-2.69924	1.34921e-07		glucosyltransferase
KKF85309.1	transporter		K03837	529.97	216.2	2e-64	serine transporter	XF37_02645	-2.70224	4.11992e-07		transporter
KKF85320.1	long polar fimbrial protein LpfA		K07352	183.1	157.9	6e-47	type 1 fimbrial protein	XF37_02715	-2.70393	0.00506186		long polar fimbrial protein LpfA
KKF84439.1	histidine kinase		K07679	618.87	940.1	6.6e-283	two-component system, NarL family, sensor histidine kinase EvgS [EC:2.7	XF37_07305	-2.71235	7.11458e-09		histidine kinase
KKF84067.1	ATP synthase		K22506	584.47	701.8	1e-211	type III secretion system ATPase [EC:7.4.2.8]	XF37_08530	-2.7141	0.000306652		ATP synthase
KKF84062.1	membrane protein		K18839	69.87	81.2	1.4e-23	toxin GhoT	XF37_08505	-2.71485	0.00428591		membrane protein
KKF85666.1	secretion system apparatus protein SsaV		K03230	745.77	826.9	8.8e-249	type III secretion protein V	XF37_00110	-2.71881	0.000178787		secretion system apparatus protein SsaV
KKF83313.1	hemolysin D		K11003	468.27	471.9	7.1e-142	hemolysin D	XF37_13075	-2.72039	9.9597e-08		hemolysin D
KKF85506.1	30S ribosomal protein S10	rpsJ	K02946	67.63	151.3	1e-44	small subunit ribosomal protein S10	XF37_01770	-2.72185	4.68409e-11	rpsJ	30S ribosomal protein S10
KKF82623.1	glycosyl transferase		K13683	262.9	164	1.2e-48	putative colanic acid biosynthesis glycosyltransferase [EC:2.4.-.-]	XF37_17190	-2.73315	8.63647e-09		glycosyl transferase
KKF84499.1	transcriptional regulator		K10921	110.63	94.6	2.4e-27	cholera toxin transcriptional activator	XF37_06970	-2.73508	2.8569e-06		transcriptional regulator
KKF84484.1	transcriptional regulator	putA	K13821	682.73	1640.8	0	RHH-type transcriptional regulator, proline utilization regulon repress	XF37_06885	-2.74415	4.87161e-09	putA	transcriptional regulator
KKF85736.1	membrane protein insertase		K03217	116.7	297.6	3.1e-89	YidC/Oxa1 family membrane protein insertase	XF37_00500	-2.74547	2.62877e-12		membrane protein insertase
KKF85734.1	ribonuclease P	rnpA	K03536	34.83	119.7	4.6e-35	ribonuclease P protein component [EC:3.1.26.5]	XF37_00490	-2.74617	9.10734e-08	rnpA	ribonuclease P
KKF84903.1	isochorismatase		K01252	315.5	418.3	4.9e-126	bifunctional isochorismate lyase / aryl carrier protein [EC:3.3.2.1 6.3	XF37_05035	-2.74618	3.57231e-06		isochorismatase
KKF82823.1	flagellar basal body-associated protein FliL	fliL	K02415	31	108.2	1.6e-31	flagellar protein FliL	XF37_15605	-2.7491	0.00425343	fliL	flagellar basal body-associated protein FliL
KKF81326.1	cytochrome C biogenesis protein CcmF		K02198	469.1	884	3e-266	cytochrome c-type biogenesis protein CcmF	XF37_23225	-2.75214	4.84963e-07		cytochrome C biogenesis protein CcmF
KKF84655.1	adenine phosphoribosyltransferase		K00759	100.5	277.2	3.8e-83	adenine phosphoribosyltransferase [EC:2.4.2.7]	XF37_06180	-2.75328	3.43514e-08		adenine phosphoribosyltransferase
KKF81551.1	hemin transporter		K07225	89.33	472.9	3.8e-142	putative hemin transport protein	XF37_21310	-2.75534	1.34974e-05		hemin transporter
KKF81472.1	lysozyme		K01185	24.3	157.3	2.4e-46	lysozyme [EC:3.2.1.17]	XF37_22540	-2.75797	0.0157274		lysozyme
KKF82034.1	translation initiation factor IF-1		K02518	50	155	5.1e-46	translation initiation factor IF-1	XF37_19465	-2.77029	2.82931e-06		translation initiation factor IF-1
KKF85683.1	hypothetical protein		K20552	200.8	252.4	2.7e-76	transcriptional regulator of LEE operons	XF37_00205	-2.77277	7.70132e-07		hypothetical protein
KKF83219.1	cob(I)alamin adenolsyltransferase/cobinamide ATP-dependent adenolsyltransferase		K19221	118.37	264.3	4.7e-79	cob(I)alamin adenosyltransferase [EC:2.5.1.17]	XF37_13300	-2.77551	0.00415922		cob(I)alamin adenolsyltransferase/cobinamide ATP-dependent adenolsyltransferase
KKF83706.1	structural protein		K18838	54.77	76.4	6.1e-22	cytoskeleton bundling-enhancing protein CbeA and related proteins	XF37_11020	-2.77571	0.0035066		structural protein
KKF85504.1	50S ribosomal protein L4	rplD	K02926	92.3	261	4.5e-78	large subunit ribosomal protein L4	XF37_01760	-2.78224	3.00209e-11	rplD	50S ribosomal protein L4
KKF84902.1	2,3-dihydroxybenzoate-2,3-dehydrogenase		K00216	235.17	378.2	7.2e-114	2,3-dihydro-2,3-dihydroxybenzoate dehydrogenase [EC:1.3.1.28]	XF37_05030	-2.7874	2.55649e-06		2,3-dihydroxybenzoate-2,3-dehydrogenase
KKF84791.1	hypothetical protein		K04984	496.87	50.4	2.2e-14	transient receptor potential cation channel subfamily A member 1	XF37_05550	-2.79968	0.00506186		hypothetical protein
KKF80976.1	spermidine/putrescine ABC transporter substrate-binding protein		K22015	863.73	256.1	1.6e-76	formate dehydrogenase (acceptor) [EC:1.17.99.7]	XF37_24805	-2.80365	0.0233496		spermidine/putrescine ABC transporter substrate-binding protein
KKF82360.1	membrane protein		K09953	152.5	177.8	8.5e-53	lipid A 3-O-deacylase [EC:3.1.1.-]	XF37_18030	-2.80969	3.53232e-06		membrane protein
KKF81864.1	curli assembly protein CsgE		K04337	85.93	183.6	3.6e-55	curli production assembly/transport component CsgE	XF37_20955	-2.81601	3.93519e-05		curli assembly protein CsgE
KKF80522.1	fimbrial assembly protein		K07347	605.83	671.5	7.2e-202	outer membrane usher protein	XF37_27420	-2.81647	0.000227094		fimbrial assembly protein
KKF83425.1	multidrug transporter		K18141	581.1	643.6	2.8e-194	membrane fusion protein, multidrug efflux system	XF37_11090	-2.82199	0.00213672		multidrug transporter
KKF81075.1	hypothetical protein		K03969	99.37	38.8	1.9e-10	phage shock protein A	XF37_25355	-2.83805	0.000643154		hypothetical protein
KKF84904.1	enterobactin synthase subunit E	entE	K02363	742.67	805.3	7.2e-243	2,3-dihydroxybenzoate-AMP ligase [EC:6.3.2.14 2.7.7.58]	XF37_05040	-2.84161	3.48483e-05	entE	enterobactin synthase subunit E
KKF80623.1	S-adenosylmethionine decarboxylase		K01611	20.73	57.6	4.3e-16	S-adenosylmethionine decarboxylase [EC:4.1.1.50]	XF37_27950	-2.8505	1.37589e-08		S-adenosylmethionine decarboxylase
KKF85775.1	16S rRNA methyltransferase	gidB	K03501	73.27	236.1	1.6e-70	16S rRNA (guanine527-N7)-methyltransferase [EC:2.1.1.170]	XF37_00710	-2.85096	3.5793e-06	gidB	16S rRNA methyltransferase
KKF85436.1	hemolysin E	hlyE	K11139	125.67	655	4.8e-198	hemolysin E	XF37_01980	-2.86314	1.66211e-07	hlyE	hemolysin E
KKF81856.1	glucans biosynthesis protein	opgC	K11941	116.47	289.6	1.2e-86	glucans biosynthesis protein C [EC:2.1.-.-]	XF37_20910	-2.86648	4.22676e-08	opgC	glucans biosynthesis protein
KKF83086.1	aminodeoxychorismate synthase	pabB	K01665	506.57	603.3	2.4e-181	para-aminobenzoate synthetase component I [EC:2.6.1.85]	XF37_15070	-2.87084	4.4907e-05	pabB	aminodeoxychorismate synthase
KKF82121.1	catecholate siderophore receptor Fiu		K16090	580.73	821.9	1.6e-247	catecholate siderophore receptor	XF37_19925	-2.88235	7.76367e-08		catecholate siderophore receptor Fiu
KKF84141.1	serine/threonine protein kinase		K03837	529.97	689.9	3.2e-208	serine transporter	XF37_08945	-2.8833	3.99093e-11		serine/threonine protein kinase
KKF84023.1	glycine cleavage system protein T	gcvT	K00605	312.7	474.2	1.7e-142	aminomethyltransferase [EC:2.1.2.10]	XF37_08285	-2.88353	9.91546e-09	gcvT	glycine cleavage system protein T
KKF82920.1	membrane protein		K15549	310.83	259	1.5e-77	membrane fusion protein, multidrug efflux system	XF37_14185	-2.88828	0.000120712		membrane protein
KKF84813.1	protease		K01355	370.93	507	4.4e-153	omptin [EC:3.4.23.49]	XF37_05200	-2.90401	1.87204e-08		protease
KKF80394.1	HNH nuclease		K07451	38.27	42.1	2.1e-11	5-methylcytosine-specific restriction enzyme A [EC:3.1.21.-]	XF37_26695	-2.9238	6.73993e-06		HNH nuclease
KKF84069.1	type III secretion system protein		K03225	88.83	107.5	4e-31	type III secretion protein Q	XF37_08550	-2.92539	9.58703e-06		type III secretion system protein
KKF82020.1	MFS transporter		K08219	266.9	605.2	1.2e-182	MFS transporter, UMF2 family, putative MFS family transporter protein	XF37_19395	-2.9257	2.28915e-08		MFS transporter
KKF82157.1	T3SS effector protein NleH		K16042	431.3	607.7	8.6e-184	non-LEE-encoded effector NleH	XF37_20110	-2.94158	8.40252e-05		T3SS effector protein NleH
KKF81286.1	glycerol-3-phosphate dehydrogenase	glpA	K00111	150.93	394.4	2.7e-118	glycerol-3-phosphate dehydrogenase [EC:1.1.5.3]	XF37_23005	-2.95015	0.000497575	glpA	glycerol-3-phosphate dehydrogenase
KKF81260.1	membrane protein		K11892	111.1	225.9	3.4e-67	type VI secretion system protein ImpK	XF37_23755	-2.9537	0.000964279		membrane protein
KKF85663.1	SepQ		K03225	88.83	24.9	5.1e-06	type III secretion protein Q	XF37_00090	-2.9626	4.10788e-09		SepQ
KKF84761.1	maltose/maltodextrin transporter ATP-binding protein		K10111	514.17	608.1	2.8e-183	multiple sugar transport system ATP-binding protein [EC:3.6.3.-]	XF37_05400	-2.97129	1.7719e-11		maltose/maltodextrin transporter ATP-binding protein
KKF84764.1	maltose transporter membrane protein	malF	K10109	526.6	814.5	1e-245	maltose/maltodextrin transport system permease protein	XF37_05415	-2.97252	1.3146e-06	malF	maltose transporter membrane protein
KKF81180.1	hypothetical protein		K12681	2042.3	191.7	5.2e-57	pertactin	XF37_23995	-2.97651	1.7018e-07		hypothetical protein
KKF84083.1	transcriptional regulator		K22486	170.57	466.5	4.9e-140	transcriptional regulator HilA, main transcriptional regulator of SPI1	XF37_08640	-2.99075	1.26818e-07		transcriptional regulator
KKF84025.1	glycine dehydrogenase		K00281	668.07	1653.6	0	glycine dehydrogenase [EC:1.4.4.2]	XF37_08295	-2.99778	6.80828e-10		glycine dehydrogenase
KKF81979.1	dihydroorotate dehydrogenase		K00254	183.83	466.1	4.8e-140	dihydroorotate dehydrogenase [EC:1.3.5.2]	XF37_19165	-3.00947	1.02063e-05		dihydroorotate dehydrogenase
KKF84011.1	methylmalonyl-CoA decarboxylase		K11264	275.27	440.9	4e-133	methylmalonyl-CoA decarboxylase [EC:4.1.1.-]	XF37_08220	-3.00988	0.000139238		methylmalonyl-CoA decarboxylase
KKF84760.1	maltoporin	lamB	K02024	275.8	593.5	1.1e-178	maltoporin	XF37_05395	-3.01877	1.14958e-12	lamB	maltoporin
KKF84494.1	N-glycosyltransferase		K11936	247.63	452.9	4.1e-136	poly-beta-1,6-N-acetyl-D-glucosamine synthase [EC:2.4.1.-]	XF37_06940	-3.0238	1.10369e-05		N-glycosyltransferase
KKF84883.1	citrate lyase subunit alpha		K01643	358.3	839.8	2.3e-253	citrate lyase subunit alpha / citrate CoA-transferase [EC:2.8.3.10]	XF37_04930	-3.03079	0.000169699		citrate lyase subunit alpha
KKF83566.1	endoribonuclease L-PSP		K09022	76.87	177.6	8.7e-53	2-iminobutanoate/2-iminopropanoate deaminase [EC:3.5.99.10]	XF37_11840	-3.0546	6.35748e-07		endoribonuclease L-PSP
KKF84812.1	hydrolase		K01259	137.63	43.1	7.1e-12	proline iminopeptidase [EC:3.4.11.5]	XF37_05195	-3.06314	1.06594e-08		hydrolase
KKF82626.1	glycosyl transferase		K12994	258.93	87.9	2.1e-25	mannosyl-N-acetyl-alpha-D-glucosaminyl-diphospho-ditrans,octacis-undeca	XF37_17205	-3.07524	1.73392e-08		glycosyl transferase
KKF84894.1	LysR family transcriptional regulator		K05798	245.87	162.2	5.2e-48	LysR family transcriptional regulator, transcriptional activator for le	XF37_04990	-3.08104	0.00246515		LysR family transcriptional regulator
KKF82621.1	glycosyl transferase		K16698	201.6	283.2	9.9e-85	teichuronic acid biosynthesis glycosyltransferase TuaG [EC:2.4.-.-]	XF37_17180	-3.08192	6.39294e-10		glycosyl transferase
KKF80908.1	tail assembly protein		K03636	35.77	24	8.8e-06	sulfur-carrier protein	XF37_25660	-3.08292	0.00486556		tail assembly protein
KKF81716.1	peptidylprolyl isomerase		K03767	222.47	228.8	3e-68	peptidyl-prolyl cis-trans isomerase A (cyclophilin A) [EC:5.2.1.8]	XF37_22170	-3.0845	2.55649e-06		peptidylprolyl isomerase
KKF82024.1	dimethyl sulfoxide reductase		K07309	1542.7	1406.9	0	Tat-targeted selenate reductase subunit YnfE [EC:1.97.1.9]	XF37_19415	-3.09887	3.86007e-07		dimethyl sulfoxide reductase
KKF83678.1	hydrogenase 2 large subunit		K06281	674.1	698.7	1.7e-210	hydrogenase large subunit [EC:1.12.99.6]	XF37_12435	-3.09916	1.841e-07		hydrogenase 2 large subunit
KKF81051.1	fumarate reductase		K00246	50.03	98.5	1.5e-28	fumarate reductase subunit C	XF37_25215	-3.09927	4.64769e-08		fumarate reductase
KKF82625.1	perosamine synthetase		K13010	400.7	485.5	7.1e-146	perosamine synthetase [EC:2.6.1.102]	XF37_17200	-3.10367	5.48256e-10		perosamine synthetase
KKF82215.1	pentapeptide repeats family protein		K21919	142.5	69.1	1.1e-19	BTB/POZ domain-containing protein KCTD9	XF37_18800	-3.10387	2.2692e-08		pentapeptide repeats family protein
KKF84718.1	iroE		K23721	380.8	159.7	2.5e-47	apo-salmochelin esterase [EC:3.1.1.107]	XF37_05690	-3.10947	3.35876e-08		iroE
KKF80844.1	molecular chaperone		K07353	387.33	405.3	1.6e-122	fimbrial chaperone protein	XF37_26085	-3.11086	0.00884508		molecular chaperone
KKF84337.1	hypothetical protein		K03581	244.37	27.6	3.5e-07	exodeoxyribonuclease V alpha subunit [EC:3.1.11.5]	XF37_07725	-3.1198	0.000528086		hypothetical protein
KKF81085.1	ascorbate 6-phosphate lactonase		K03476	153.57	454.1	5.1e-137	L-ascorbate 6-phosphate lactonase [EC:3.1.1.-]	XF37_25405	-3.12427	0.0025009		ascorbate 6-phosphate lactonase
KKF80393.1	N-acetylneuraminate epimerase		K17948	306.07	84.6	1.6e-24	N-acetylneuraminate epimerase [EC:5.1.3.24]	XF37_26690	-3.14021	0.000160334		N-acetylneuraminate epimerase
KKF81074.1	hypothetical protein		K09980	99.97	148.9	3.7e-44	uncharacterized protein	XF37_25350	-3.14137	0.000539998		hypothetical protein
KKF81325.1	cytochrome C biogenesis protein CcmE		K02197	36.33	214.9	3.4e-64	cytochrome c-type biogenesis protein CcmE	XF37_23220	-3.15545	2.03986e-05		cytochrome C biogenesis protein CcmE
KKF85319.1	long polar fimbrial chaperone LpfB		K07353	387.33	236.3	7e-71	fimbrial chaperone protein	XF37_02710	-3.16646	0.00206418		long polar fimbrial chaperone LpfB
KKF80618.1	pyruvate dehydrogenase	aceF	K00627	448.5	654.7	4.1e-197	pyruvate dehydrogenase E2 component (dihydrolipoamide acetyltransferase	XF37_27925	-3.16773	2.94125e-11	aceF	pyruvate dehydrogenase
KKF84081.1	lytic transglycosylase		K18377	297	64	5.3e-18	lysozyme-related protein Hpa2	XF37_08630	-3.18113	0.000233374		lytic transglycosylase
KKF81229.1	membrane protein		K07275	68.7	251.5	4.2e-75	outer membrane protein	XF37_24275	-3.19685	1.34574e-08		membrane protein
KKF80800.1	type III secretion protein GogB	gogB	K23942	1157.4	238.4	3.6e-71	Gifsy-1 prophage leucine-rich repeat protein	XF37_26370	-3.2109	3.56803e-07	gogB	type III secretion protein GogB
KKF85673.1	GrlA, global regulator of LEE activator		K08277	135.7	35.6	2.4e-09	transcriptional activator CaiF	XF37_00150	-3.22113	2.73848e-06		GrlA, global regulator of LEE activator
KKF81323.1	heme ABC transporter permease		K02195	95.37	318.4	1.6e-95	heme exporter protein C	XF37_23210	-3.22679	1.47459e-08		heme ABC transporter permease
KKF85672.1	permease		K15368	115.33	177.7	4.6e-53	secretion system chaperone SscA	XF37_00145	-3.23955	0.00203708		permease
KKF85077.1	deubiquitinase		K18015	145.37	484.2	6.5e-146	deubiquitinase [EC:3.4.22.-]	XF37_04175	-3.23971	1.47002e-07		deubiquitinase
KKF84932.1	ornithine decarboxylase		K01584	764.37	511.8	1.2e-153	arginine decarboxylase [EC:4.1.1.19]	XF37_04565	-3.24512	1.44693e-09		ornithine decarboxylase
KKF85379.1	ligase		K18814	139.67	101.9	1.3e-29	putative inorganic carbon (hco3(-)) transporter	XF37_02180	-3.25991	1.47477e-09		ligase
KKF81050.1	fumarate reductase		K00247	34.37	198.1	2.5e-59	fumarate reductase subunit D	XF37_25210	-3.27017	9.52495e-06		fumarate reductase
KKF84504.1	molecular chaperone		K15540	268.73	236.3	1.2e-70	chaperone protein EcpD	XF37_06995	-3.29026	0.000100791		molecular chaperone
KKF84311.1	multidrug ABC transporter ATP-binding protein		K02471	404.23	618.9	3.2e-186	vitamin B12/bleomycin/antimicrobial peptide transport system ATP-bindin	XF37_07580	-3.30619	4.15382e-05		multidrug ABC transporter ATP-binding protein
KKF81030.1	lysine/cadaverine antiporter	cadB	K03757	633.03	861	5.1e-260	cadaverine:lysine antiporter	XF37_25100	-3.31981	9.11932e-06	cadB	lysine/cadaverine antiporter
KKF84758.1	pentapeptide repeats family protein		K21919	142.5	56.3	8.8e-16	BTB/POZ domain-containing protein KCTD9	XF37_05385	-3.32083	1.84724e-05		pentapeptide repeats family protein
KKF82743.1	formate dehydrogenase		K08348	1598.57	1631.9	0	formate dehydrogenase-N, alpha subunit [EC:1.17.5.3]	XF37_16030	-3.33902	0.000445956		formate dehydrogenase
KKF83327.1	peptidase C39		K11004	937.57	1106.7	0	ATP-binding cassette, subfamily B, bacterial HlyB/CyaB	XF37_13070	-3.34336	1.80019e-07		peptidase C39
KKF83999.1	cobalt ABC transporter permease		K16785	103.73	71.4	2.2e-20	energy-coupling factor transport system permease protein	XF37_08160	-3.35012	7.67862e-06		cobalt ABC transporter permease
KKF85741.1	tryptophan permease		K03836	742.73	876.6	6.6e-265	low affinity tryptophan permease	XF37_00530	-3.35237	6.73474e-08		tryptophan permease
KKF80617.1	pyruvate dehydrogenase	aceE	K00163	145.7	1445.1	0	pyruvate dehydrogenase E1 component [EC:1.2.4.1]	XF37_27920	-3.38585	3.75974e-12	aceE	pyruvate dehydrogenase
KKF82159.1	non-LEE encoded effector protein NleB		K23657	674.57	672.7	2.5e-203	T3SS secreted effector NleB	XF37_20120	-3.39199	1.8368e-09		non-LEE encoded effector protein NleB
KKF81904.1	peptidase M20		K01451	517.43	661.9	3.6e-199	hippurate hydrolase [EC:3.5.1.32]	XF37_20240	-3.39929	0.000658766		peptidase M20
KKF84091.1	hypothetical protein		K10921	110.63	95.7	1.1e-27	cholera toxin transcriptional activator	XF37_08680	-3.39979	2.9503e-07		hypothetical protein
KKF83675.1	hydrogenase 2 small subunit		K06282	372.37	462	6.2e-139	hydrogenase small subunit [EC:1.12.99.6]	XF37_12420	-3.42041	1.83742e-08		hydrogenase 2 small subunit
KKF80455.1	carbon starvation protein A		K23676	1263.77	1377.2	0	pyruvate/proton symporter	XF37_27035	-3.42971	4.47763e-10		carbon starvation protein A
KKF85763.1	fimbrial protein	lpfA	K07345	95.87	144.9	1.1e-42	major type 1 subunit fimbrin (pilin)	XF37_00650	-3.43262	0.00368393	lpfA	fimbrial protein
KKF83261.1	membrane protein		K03319	494.83	546.9	1.4e-164	divalent anion:Na+ symporter, DASS family	XF37_13550	-3.44247	0.000855356		membrane protein
KKF85239.1	translation initiation factor Sui1		K03113	52.03	77.1	6.8e-22	translation initiation factor 1	XF37_03465	-3.45394	5.27019e-07		translation initiation factor Sui1
KKF81287.1	sn-glycerol-3-phosphate transporter	glpT	K02445	514.2	706.5	4.4e-213	MFS transporter, OPA family, glycerol-3-phosphate transporter	XF37_23010	-3.45461	9.96911e-09	glpT	sn-glycerol-3-phosphate transporter
KKF85671.1	outer membrane secretin SsaC	ssaC	K03219	436.53	452.3	6.5e-136	type III secretion protein C	XF37_00140	-3.46521	2.90764e-08	ssaC	outer membrane secretin SsaC
KKF81049.1	beta-lactamase		K19096	876.27	701.1	8.6e-212	beta-lactamase class C CMY-2 [EC:3.5.2.6]	XF37_25205	-3.46848	4.24942e-09		beta-lactamase
KKF84085.1	hypothetical protein		K15368	115.33	53.4	7.5e-15	secretion system chaperone SscA	XF37_08650	-3.47317	0.00016073		hypothetical protein
KKF82816.1	flagellar hook-basal body protein FliE	fliE	K02408	40.43	113.5	3.4e-33	flagellar hook-basal body complex protein FliE	XF37_15570	-3.47486	1.02451e-05	fliE	flagellar hook-basal body protein FliE
KKF82371.1	hypothetical protein		K07451	38.27	21.2	4.6e-05	5-methylcytosine-specific restriction enzyme A [EC:3.1.21.-]	XF37_17975	-3.48265	5.81478e-05		hypothetical protein
KKF81859.1	curli assembly protein CsgC	csgC	K04336	84.83	192.6	3.5e-58	curli production protein	XF37_20930	-3.49362	0.000764611	csgC	curli assembly protein CsgC
KKF80909.1	endodeoxyribonuclease		K01160	33.7	121.8	1.3e-35	crossover junction endodeoxyribonuclease RusA [EC:3.1.22.4]	XF37_25610	-3.49913	0.000137465		endodeoxyribonuclease
KKF85349.1	hypothetical protein		K07126	60.17	38	3.5e-10	uncharacterized protein	XF37_02030	-3.50067	0.000424069		hypothetical protein
KKF81053.1	fumarate reductase		K00239	682.73	674.4	5.2e-203	succinate dehydrogenase / fumarate reductase, flavoprotein subunit [EC:	XF37_25225	-3.5032	2.58825e-11		fumarate reductase
KKF80371.1	hydrolase		K03760	374.63	723.7	5.9e-218	lipid A ethanolaminephosphotransferase [EC:2.7.8.43]	XF37_28410	-3.52139	4.45088e-10		hydrolase
KKF84799.1	recombinase		K04763	233.77	101.4	2.3e-29	integrase/recombinase XerD	XF37_05250	-3.52697	0.00166752		recombinase
KKF84495.1	outer membrane N-deacetylase	pgaB	K11931	237.67	779.9	5.9e-235	poly-beta-1,6-N-acetyl-D-glucosamine N-deacetylase [EC:3.5.1.-]	XF37_06945	-3.53332	1.08545e-08	pgaB	outer membrane N-deacetylase
KKF80971.1	nitrite reductase		K04017	172.5	207.3	2.1e-62	formate-dependent nitrite reductase complex subunit NrfF	XF37_24780	-3.58479	0.000706868		nitrite reductase
KKF81052.1	fumarate reductase		K00245	281.87	391.6	7.6e-118	fumarate reductase iron-sulfur subunit [EC:1.3.5.4]	XF37_25220	-3.59109	3.00209e-11		fumarate reductase
KKF80541.1	carnitinyl-CoA dehydratase		K08299	328.83	428.9	2.5e-129	crotonobetainyl-CoA hydratase [EC:4.2.1.149]	XF37_27520	-3.61063	0.000203864		carnitinyl-CoA dehydratase
KKF84280.1	type III secretion protein		K22514	66.53	114.8	3.3e-33	type III secretion system protein	XF37_08545	-3.6109	6.61575e-08		type III secretion protein
KKF82993.1	membrane protein		K07283	69.37	279.4	1.1e-83	putative salt-induced outer membrane protein	XF37_14590	-3.62638	1.87204e-08		membrane protein
KKF80744.1	transposase		K07497	13.5	46.9	9.8e-13	putative transposase	XF37_26515	-3.66041	0.000570857		transposase
KKF81457.1	enterotoxin		K21440	461.83	20.4	2.1e-05	ankyrin repeat domain-containing protein 50	XF37_22705	-3.67342	3.30572e-12		enterotoxin
KKF81319.1	quinol dehydrogenase	napH	K02574	132.83	256.1	2.3e-76	ferredoxin-type protein NapH	XF37_23185	-3.67943	6.09609e-10	napH	quinol dehydrogenase
KKF83565.1	pyruvate formate-lyase		K00656	738.47	1099.2	0	formate C-acetyltransferase [EC:2.3.1.54]	XF37_11835	-3.69382	4.54839e-08		pyruvate formate-lyase
KKF84065.1	type III secretion system protein		K22511	233.4	362.8	5.5e-109	type III secretion system protein	XF37_08520	-3.69468	8.36164e-05		type III secretion system protein
KKF81029.1	lysine decarboxylase LdcC		K01582	642.2	806	3.5e-243	lysine decarboxylase [EC:4.1.1.18]	XF37_25095	-3.70304	1.30441e-07		lysine decarboxylase LdcC
KKF80972.1	nitrite reductase		K04018	206.03	274.9	1.6e-82	formate-dependent nitrite reductase complex subunit NrfG	XF37_24785	-3.71209	2.42027e-06		nitrite reductase
KKF84496.1	poly-beta-1,6-N-acetyl-D-glucosamine export protein	pgaA	K11935	194.07	825.1	2.1e-248	biofilm PGA synthesis protein PgaA	XF37_06950	-3.73159	3.29395e-09	pgaA	poly-beta-1,6-N-acetyl-D-glucosamine export protein
KKF80967.1	cytochrome C nitrite reductase	nrfA	K03385	135.63	631.1	4.6e-190	nitrite reductase (cytochrome c-552) [EC:1.7.2.2]	XF37_24755	-3.73948	4.88313e-08	nrfA	cytochrome C nitrite reductase
KKF81316.1	nitrate reductase		K02570	43.43	115.1	9.4e-34	periplasmic nitrate reductase NapD	XF37_23170	-3.76173	3.7814e-05		nitrate reductase
KKF81554.1	hypothetical protein		K15352	171.33	21.2	3.8e-05	secreted effector protein PipB2	XF37_21325	-3.79487	6.8371e-05		hypothetical protein
KKF83562.1	threonine dehydratase		K01754	254.23	436.4	7e-131	threonine dehydratase [EC:4.3.1.19]	XF37_11820	-3.79671	2.57923e-08		threonine dehydratase
KKF83676.1	hydrogenase 2 protein HybA		K00124	163.7	184.4	1.1e-54	formate dehydrogenase iron-sulfur subunit	XF37_12425	-3.83137	3.29395e-09		hydrogenase 2 protein HybA
KKF81456.1	non-LEE encoded effector protein NleB		K23657	674.57	723.7	7.4e-219	T3SS secreted effector NleB	XF37_22700	-3.83388	1.32143e-09		non-LEE encoded effector protein NleB
KKF82110.1	phosphoethanolamine transferase		K19353	302.67	264.4	6.4e-79	heptose-I-phosphate ethanolaminephosphotransferase [EC:2.7.8.-]	XF37_19865	-3.85907	2.78632e-10		phosphoethanolamine transferase
KKF83922.1	trehalose-6-phosphate hydrolase		K01226	794.93	901.7	5.9e-272	trehalose-6-phosphate hydrolase [EC:3.2.1.93]	XF37_10840	-3.85963	7.30427e-09		trehalose-6-phosphate hydrolase
KKF81320.1	nitrate reductase	napB	K02568	32.37	170.5	1.4e-50	nitrate reductase (cytochrome), electron transfer subunit	XF37_23190	-3.88139	6.98285e-09	napB	nitrate reductase
KKF81318.1	quinol dehydrogenase	napG	K02573	138.27	309	1.3e-92	ferredoxin-type protein NapG	XF37_23180	-3.93471	4.8198e-09	napG	quinol dehydrogenase
KKF84320.1	fimbrial protein		K07354	1523.57	932	9e-281	outer membrane usher protein	XF37_07625	-3.94473	4.08391e-08		fimbrial protein
KKF84214.1	formate hydrogenlyase complex iron-sulfur subunit		K15831	241.03	281.3	8.3e-85	formate hydrogenlyase subunit 6	XF37_09350	-3.96035	0.00148363		formate hydrogenlyase complex iron-sulfur subunit
KKF81591.1	nickel ABC transporter substrate-binding protein		K15584	499.7	781.3	1.2e-235	nickel transport system substrate-binding protein	XF37_21515	-3.98683	2.33044e-08		nickel ABC transporter substrate-binding protein
KKF83677.1	hydrogenase 2 b cytochrome subunit		K23303	601.67	59.5	1.1e-16	menaquinone reductase, integral membrane subunit	XF37_12430	-3.99526	1.23073e-09		hydrogenase 2 b cytochrome subunit
KKF81317.1	nitrate reductase		K02567	867.7	1467.8	0	nitrate reductase (cytochrome) [EC:1.9.6.1]	XF37_23175	-4.00208	4.26884e-10		nitrate reductase
KKF80969.1	nitrite reductase		K04014	278.57	364.1	2.3e-109	protein NrfC	XF37_24765	-4.01198	2.48354e-05		nitrite reductase
KKF82749.1	hypothetical protein		K17256	390.9	77.9	1.2e-22	insulin-like growth factor-binding protein complex acid labile subunit	XF37_16060	-4.06037	4.37843e-06		hypothetical protein
KKF81590.1	nickel transporter permease NikB		K15585	393.3	476.4	1e-143	nickel transport system permease protein	XF37_21510	-4.06889	0.000224633		nickel transporter permease NikB
KKF81165.1	toxin B		K22721	119.9	22.5	1.4e-05	inositol phosphorylceramide mannosyltransferase catalytic subunit [EC:2	XF37_23910	-4.1044	3.63361e-12		toxin B
KKF84319.1	fimbrial protein		K07348	182.57	178.3	2.5e-53	minor fimbrial subunit	XF37_07620	-4.11881	9.41193e-07		fimbrial protein
KKF80970.1	nitrite reductase		K04015	273.67	331.3	2e-99	protein NrfD	XF37_24770	-4.12013	2.73175e-06		nitrite reductase
KKF84322.1	fimbrial protein		K07352	183.1	142.7	2.7e-42	type 1 fimbrial protein	XF37_07635	-4.13504	1.5091e-07		fimbrial protein
KKF83723.1	autonomous glycyl radical cofactor GrcA		K06866	185.53	247.5	7.1e-75	autonomous glycyl radical cofactor	XF37_09775	-4.16451	9.21489e-10		autonomous glycyl radical cofactor GrcA
KKF83563.1	septum site-determining protein		K03838	738.27	950.3	4.3e-287	threonine transporter	XF37_11825	-4.17179	1.24422e-09		septum site-determining protein
KKF82646.1	putrescine/spermidine ABC transporter		K14052	360.07	606.7	6.2e-183	putrescine importer	XF37_17310	-4.17388	2.27722e-09		putrescine/spermidine ABC transporter
KKF81714.1	nitrite reductase		K00362	528.7	1311.2	0	nitrite reductase (NADH) large subunit [EC:1.7.1.15]	XF37_22160	-4.20282	2.81781e-12		nitrite reductase
KKF84781.1	PTS friuctose transporter subunit IIB		K02813	236.23	267.5	9.4e-81	sorbose PTS system EIIB component [EC:2.7.1.206]	XF37_05500	-4.20509	5.20842e-05		PTS friuctose transporter subunit IIB
KKF82092.1	c-di-GMP phosphodiesterase		K21024	607.33	313.8	9.6e-94	c-di-GMP phosphodiesterase [EC:3.1.4.52]	XF37_19770	-4.20726	5.51938e-06		c-di-GMP phosphodiesterase
KKF84604.1	type III effector		K23652	825.67	839.3	6.6e-254	T3SS secreted effector EspW	XF37_06440	-4.22279	1.98838e-09		type III effector
KKF80521.1	fimbrial family protein		K07345	95.87	36.7	1.3e-09	major type 1 subunit fimbrin (pilin)	XF37_27410	-4.23967	4.79828e-06		fimbrial family protein
KKF83564.1	propionate kinase		K00932	604.07	763.1	1.5e-230	propionate kinase [EC:2.7.2.15]	XF37_11830	-4.25234	1.88643e-10		propionate kinase
KKF81322.1	heme ABC transporter permease		K02194	55.4	269.2	1.2e-80	heme exporter protein B	XF37_23205	-4.32665	2.48051e-07		heme ABC transporter permease
KKF81284.1	glycerol-3-phosphate dehydrogenase	glpC	K00113	273.63	543.7	1.8e-163	glycerol-3-phosphate dehydrogenase subunit C	XF37_22995	-4.33843	2.52448e-06	glpC	glycerol-3-phosphate dehydrogenase
KKF83428.1	methyltransferase		K07319	236.77	283.7	7.6e-85	adenine-specific DNA-methyltransferase [EC:2.1.1.72]	XF37_11105	-4.34565	7.16904e-10		methyltransferase
KKF81455.1	T3SS effector protein NleE		K23654	455.7	486.5	2.8e-147	T3SS secreted effector NleE	XF37_22695	-4.38458	2.16163e-09		T3SS effector protein NleE
KKF83311.1	hemolysin D		K07389	40.37	142.2	6.6e-42	cytolysin-activating lysine-acyltransferase [EC:2.3.1.-]	XF37_13060	-4.39479	1.06993e-09		hemolysin D
KKF85677.1	transposase		K03228	191.1	220.6	7.1e-66	type III secretion protein T	XF37_00170	-4.43471	5.44932e-05		transposase
KKF85345.1	type VI secretion system Vgr family protein		K11904	73.77	586.6	2.6e-176	type VI secretion system secreted protein VgrG	XF37_02425	-4.43755	4.62605e-06		type VI secretion system Vgr family protein
KKF81019.1	C4-dicarboxylate transporter		K07792	595.2	740	2.3e-223	anaerobic C4-dicarboxylate transporter DcuB	XF37_25040	-4.44802	9.87025e-09		C4-dicarboxylate transporter
KKF85682.1	hypothetical protein		K18984	48.1	47.2	7.4e-13	secretion system chaperone SsaE	XF37_00200	-4.49998	2.11529e-08		hypothetical protein
KKF84275.1	cobalt ABC transporter ATP-binding protein		K16786	336.63	237.9	5.4e-71	energy-coupling factor transport system ATP-binding protein [EC:3.6.3.-	XF37_08155	-4.50078	1.29071e-05		cobalt ABC transporter ATP-binding protein
KKF85740.1	cysteine desulfhydrase	tnaA	K01667	668	744.8	4.1e-224	tryptophanase [EC:4.1.99.1]	XF37_00525	-4.51546	1.54934e-15	tnaA	cysteine desulfhydrase
KKF81453.1	cytotoxin		K22721	119.9	20.6	5.2e-05	inositol phosphorylceramide mannosyltransferase catalytic subunit [EC:2	XF37_22685	-4.51992	1.16807e-11		cytotoxin
KKF84070.1	type III secretion system protein		K22507	281.17	345.6	3.6e-104	type III secretion system export apparatus protein	XF37_08555	-4.52558	4.03068e-06		type III secretion system protein
KKF84509.1	hydroxymyristoyl-ACP dehydratase		K02372	68	85.3	1.7e-24	3-hydroxyacyl-[acyl-carrier-protein] dehydratase [EC:4.2.1.59]	XF37_07030	-4.56199	2.23581e-05		hydroxymyristoyl-ACP dehydratase
KKF82919.1	membrane protein		K21695	32.63	23.5	1.4e-05	protein AaeX	XF37_14180	-4.57248	3.03373e-05		membrane protein
KKF84913.1	hypothetical protein		K07214	249.83	96	6.4e-28	iron(III)-enterobactin esterase [EC:3.1.1.108]	XF37_05085	-4.67325	4.03313e-09		hypothetical protein
KKF84075.1	type III secretion system needle complex protein PrgI		K03221	43.23	109.3	3e-32	type III secretion protein F	XF37_08595	-4.68393	1.11667e-05		type III secretion system needle complex protein PrgI
KKF85676.1	secretion protein		K03229	386.97	385.9	5.1e-116	type III secretion protein U	XF37_00165	-4.73517	1.75233e-05		secretion protein
KKF84270.1	alpha-amylase		K01176	255.07	61.3	2.2e-17	alpha-amylase [EC:3.2.1.1]	XF37_09680	-4.76878	1.71247e-06		alpha-amylase
KKF81018.1	fumarate hydratase		K01676	388.07	981.2	2.1e-295	fumarate hydratase, class I [EC:4.2.1.2]	XF37_25035	-4.79153	3.30572e-12		fumarate hydratase
KKF81324.1	cytochrome C biogenesis protein CcmD		K02196	25.4	80.1	4e-23	heme exporter protein D	XF37_23215	-4.79318	1.92388e-08		cytochrome C biogenesis protein CcmD
KKF81266.1	type VI secretion system protein		K06887	101.37	154.1	2.5e-45	uncharacterized protein	XF37_23785	-5.20306	1.5625e-08		type VI secretion system protein
KKF84318.1	fimbrial protein		K07349	121.77	232.9	7.5e-70	minor fimbrial subunit	XF37_07615	-5.45106	2.28763e-08		fimbrial protein
KKF81713.1	nitrite reductase	nirD	K00363	114.7	125.8	4.4e-37	nitrite reductase (NADH) small subunit [EC:1.7.1.15]	XF37_22155	-5.46153	3.58173e-06	nirD	nitrite reductase
KKF80395.1	ompA		K02557	141.1	80.3	4.9e-23	chemotaxis protein MotB	XF37_26700	-5.54454	1.48868e-06		ompA
KKF80396.1	membrane protein		K08760	205.93	32.7	1.1e-08	apolipoprotein A-IV	XF37_26705	-5.56255	5.36433e-11		membrane protein
KKF85791.1	type III secretion apparatus protein		K23661	205.5	258.5	4.9e-78	type III secretion system protein	XF37_00125	-5.61488	2.46598e-09		type III secretion apparatus protein
KKF82744.1	sulfate ABC transporter substrate-binding protein		K08348	1598.57	337.5	4.7e-101	formate dehydrogenase-N, alpha subunit [EC:1.17.5.3]	XF37_16035	-5.73449	1.07814e-09		sulfate ABC transporter substrate-binding protein
KKF85792.1	type III secretion system protein		K03226	243.7	258.2	1.7e-77	type III secretion protein R	XF37_00180	-5.84346	2.70565e-08		type III secretion system protein
KKF80968.1	cytochrome C nitrite reductase		K04013	119.6	260.6	3.2e-78	cytochrome c-type protein NrfB	XF37_24760	-6.08933	2.447e-07		cytochrome C nitrite reductase
KKF84321.1	fimbrial chaperone protein FimC		K07353	387.33	275.1	9.9e-83	fimbrial chaperone protein	XF37_07630	-6.28019	2.26206e-09		fimbrial chaperone protein FimC
KKF85669.1	type III secretory protein EscJ		K03222	204.63	206.9	9.9e-62	type III secretion protein J	XF37_00130	-6.4688	9.88848e-08		type III secretory protein EscJ
KKF84279.1	type III secretion protein		K22513	48.27	133	2.3e-39	type III secretion system protein	XF37_08535	-6.71647	2.16163e-09		type III secretion protein
KKF84317.1	fimbrial protein		K07350	240.7	226.9	1.4e-67	minor fimbrial subunit	XF37_07610	-6.84052	1.72826e-09		fimbrial protein
KKF83558.1	hypothetical protein		K21919	142.5	22.1	1.9e-05	BTB/POZ domain-containing protein KCTD9	XF37_11800	-7.01559	4.29948e-08		hypothetical protein

## Sheet: O157H7_At-24hpi
Dataset S12. KEGG protein IDs assigned to each differentially expressed gene (DEG) using the KofamKOALA blast tool (https://www.genome.jp/tools/kofamkoala/) with a threshold E-value <10E-5. Protein accession, description, and symbol are shown, together with the corresponding KEGG ID and the blast result values [threshold, HMM (Hidden Markov Model) score, and E-value]. Information on DEGs correspo…
Protein accession	Protein description	Symbol	Kegg ID	Threshold	HMM Score	E-value	Kegg description	Gene ID	Log2FC	Adj.P.Val	Gene Name	Gene description
KKF84279.1	type III secretion protein		K22513	48.27	133	2.3e-39	type III secretion system protein	XF37_08535	4.08942	0.00188326		type III secretion protein
KKF82120.1	hypothetical protein		K13650	103.8	130.4	9.8e-39	MqsR-controlled colanic acid and biofilm protein A	XF37_19920	3.96526	1.89396e-09		hypothetical protein
KKF84913.1	hypothetical protein		K07214	249.83	96	6.4e-28	iron(III)-enterobactin esterase [EC:3.1.1.108]	XF37_05085	3.67543	0.000252832		hypothetical protein
KKF85345.1	type VI secretion system Vgr family protein		K11904	73.77	586.6	2.6e-176	type VI secretion system secreted protein VgrG	XF37_02425	3.58039	0.00370269		type VI secretion system Vgr family protein
KKF81002.1	phosphonate ABC transporter ATP-binding protein		K02041	268.67	382.4	9.9e-115	phosphonate transport system ATP-binding protein [EC:7.3.2.2]	XF37_24945	3.48185	0.00158331		phosphonate ABC transporter ATP-binding protein
KKF85792.1	type III secretion system protein		K03226	243.7	258.2	1.7e-77	type III secretion protein R	XF37_00180	3.47579	0.00608568		type III secretion system protein
KKF82816.1	flagellar hook-basal body protein FliE	fliE	K02408	40.43	113.5	3.4e-33	flagellar hook-basal body complex protein FliE	XF37_15570	3.38043	0.001896	fliE	flagellar hook-basal body protein FliE
KKF84504.1	molecular chaperone		K15540	268.73	236.3	1.2e-70	chaperone protein EcpD	XF37_06995	3.16605	0.0175765		molecular chaperone
KKF81266.1	type VI secretion system protein		K06887	101.37	154.1	2.5e-45	uncharacterized protein	XF37_23785	2.9605	0.00530466		type VI secretion system protein
KKF83895.1	iron-sulfur cluster repair di-iron protein		K07322	49.87	299.2	9.5e-90	regulator of cell morphogenesis and NO signaling	XF37_10695	2.94047	0.000125568		iron-sulfur cluster repair di-iron protein
KKF80521.1	fimbrial family protein		K07345	95.87	36.7	1.3e-09	major type 1 subunit fimbrin (pilin)	XF37_27410	2.89343	0.0215468		fimbrial family protein
KKF81985.1	NAD(P)H-dependent FMN reductase		K00299	96.63	176.5	2.8e-52	FMN reductase [EC:1.5.1.38]	XF37_19205	2.88944	0.000229816		NAD(P)H-dependent FMN reductase
KKF81989.1	aliphatic sulfonates transport ATP-binding subunit	ssuB	K15555	319.93	354.8	1.4e-106	sulfonate transport system ATP-binding protein [EC:7.6.2.14]	XF37_19225	2.80168	0.00201265	ssuB	aliphatic sulfonates transport ATP-binding subunit
KKF85213.1	phage shock protein		K03969	99.37	213	2.7e-63	phage shock protein A	XF37_03325	2.72795	1.309e-08		phage shock protein
KKF81986.1	alkanesulfonate transporter substrate-binding subunit		K15553	211.97	395.7	8.7e-119	sulfonate transport system substrate-binding protein	XF37_19210	2.70995	0.00193053		alkanesulfonate transporter substrate-binding subunit
KKF81324.1	cytochrome C biogenesis protein CcmD		K02196	25.4	80.1	4e-23	heme exporter protein D	XF37_23215	2.68271	0.0188933		cytochrome C biogenesis protein CcmD
KKF85211.1	transcriptional regulator		K03973	30.9	77.1	4e-22	phage shock protein C	XF37_03315	2.67912	2.06743e-05		transcriptional regulator
KKF85210.1	phage-shock protein		K03971	52.7	126.3	9.1e-38	phage shock protein D	XF37_03310	2.57016	0.00022941		phage-shock protein
KKF80972.1	nitrite reductase		K04018	206.03	274.9	1.6e-82	formate-dependent nitrite reductase complex subunit NrfG	XF37_24785	2.56579	0.0381641		nitrite reductase
KKF83453.1	membrane protein		K12151	91.6	74.4	2.7e-21	multiple stress resistance protein BhsA	XF37_11235	2.54591	0.0334682		membrane protein
KKF85212.1	phage shock protein	pspB	K03970	30.03	105.1	4.5e-31	phage shock protein B	XF37_03320	2.52257	2.54486e-05	pspB	phage shock protein
KKF82690.1	50S ribosomal protein L31 type B		K02909	23.93	96.9	5.1e-28	large subunit ribosomal protein L31	XF37_16260	2.50922	0.0107675		50S ribosomal protein L31 type B
KKF81988.1	alkanesulfonate transporter permease subunit	ssuC	K15554	280.67	359.1	1e-107	sulfonate transport system permease protein	XF37_19220	2.46983	0.00393733	ssuC	alkanesulfonate transporter permease subunit
KKF81987.1	alkanesulfonate monooxygenase		K04091	335.63	648.9	1.3e-195	alkanesulfonate monooxygenase [EC:1.14.14.5]	XF37_19215	2.42299	0.00125174		alkanesulfonate monooxygenase
KKF84280.1	type III secretion protein		K22514	66.53	114.8	3.3e-33	type III secretion system protein	XF37_08545	2.22113	0.00823732		type III secretion protein
KKF81793.1	multiple stress resistance protein BhsA		K12151	91.6	144.9	2.8e-43	multiple stress resistance protein BhsA	XF37_20580	2.14357	0.0157776		multiple stress resistance protein BhsA
KKF82124.1	hypothetical protein		K12151	91.6	99.4	4.3e-29	multiple stress resistance protein BhsA	XF37_19940	2.11918	0.00173636		hypothetical protein
KKF85264.1	hypothetical protein		K06884	17.07	58.2	4.6e-16	uncharacterized protein	XF37_03600	2.06608	0.000125568		hypothetical protein
KKF83751.1	dihydropteridine reductase		K05916	274.5	550.7	8.2e-166	nitric oxide dioxygenase [EC:1.14.12.17]	XF37_09925	2.04573	0.0142076		dihydropteridine reductase
KKF82332.1	taurine ABC transporter substrate-binding protein	tauA	K15551	224.63	449.9	1.6e-135	taurine transport system substrate-binding protein	XF37_18500	1.7114	0.0361996	tauA	taurine ABC transporter substrate-binding protein
KKF81944.1	stress-induced bacterial acidophilic repeat motif		K06884	17.07	60.5	9.5e-17	uncharacterized protein	XF37_20150	1.66968	0.00119311		stress-induced bacterial acidophilic repeat motif
KKF81644.1	quercetin 2,3-dioxygenase		K06911	33	192.2	6.1e-57	quercetin 2,3-dioxygenase [EC:1.13.11.24]	XF37_21795	1.62796	0.000229816		quercetin 2,3-dioxygenase
KKF84451.1	hydrogenase 1 maturation protease		K03605	103.07	184.5	1.2e-54	hydrogenase maturation protease [EC:3.4.23.-]	XF37_06695	1.54296	0.0149025		hydrogenase 1 maturation protease
KKF85143.1	glyceraldehyde-3-phosphate dehydrogenase		K00134	180.2	458.2	9.7e-138	glyceraldehyde 3-phosphate dehydrogenase [EC:1.2.1.12]	XF37_02955	1.31158	0.00250137		glyceraldehyde-3-phosphate dehydrogenase
KKF82625.1	perosamine synthetase		K13010	400.7	485.5	7.1e-146	perosamine synthetase [EC:2.6.1.102]	XF37_17200	1.28492	0.011722		perosamine synthetase
KKF85151.1	FMN-dependent NADH-azoreductase		K01118	84.33	301.4	2.5e-90	FMN-dependent NADH-azoreductase [EC:1.7.1.17]	XF37_02995	1.28178	0.0361996		FMN-dependent NADH-azoreductase
KKF81457.1	enterotoxin		K21440	461.83	20.4	2.1e-05	ankyrin repeat domain-containing protein 50	XF37_22705	1.25332	0.0175142		enterotoxin
KKF81907.1	argininosuccinate lyase		K14681	1008.7	863.5	2.4e-260	argininosuccinate lyase / amino-acid N-acetyltransferase [EC:4.3.2.1 2.	XF37_20255	-1.10298	0.00186348		argininosuccinate lyase
KKF81928.1	cystathionine gamma-synthase		K01758	591.6	471	1.1e-141	cystathionine gamma-lyase [EC:4.4.1.1]	XF37_20365	-1.14625	0.0498019		cystathionine gamma-synthase
KKF82442.1	glutamine synthetase	glnA	K20712	1022.87	825.2	3.4e-249	3-(hydroxyamino)phenol mutase [EC:5.4.4.3]	XF37_17890	-1.14725	0.00250137	glnA	glutamine synthetase
KKF83897.1	quinone oxidoreductase		K19267	123.77	378	2.2e-113	NAD(P)H dehydrogenase (quinone) [EC:1.6.5.2]	XF37_10705	-1.20219	0.0375203		quinone oxidoreductase
KKF81908.1	acetylglutamate kinase		K00930	215.67	240.3	9.4e-72	acetylglutamate kinase [EC:2.7.2.8]	XF37_20260	-1.25233	0.0107851		acetylglutamate kinase
KKF84122.1	N-acetylglutamate synthase		K14682	235.37	703.6	1.1e-211	amino-acid N-acetyltransferase [EC:2.3.1.1]	XF37_08835	-1.38047	0.000688069		N-acetylglutamate synthase
KKF85552.1	5-methyltetrahydropteroyltriglutamate--homocysteine methyltransferase		K00549	51.6	791.2	1.9e-238	5-methyltetrahydropteroyltriglutamate--homocysteine methyltransferase [	XF37_01040	-1.38585	0.00461275		5-methyltetrahydropteroyltriglutamate--homocysteine methyltransferase
KKF82736.1	biofilm-dependent modulation protein		K21976	54.4	23.6	1e-05	probable RcsB/C two-component-system connector, global regulator of bio	XF37_15995	-1.40326	0.00188326		biofilm-dependent modulation protein
KKF82464.1	nitrogen regulation protein NR(I)	glnG	K07712	591.53	786.6	3.4e-237	two-component system, NtrC family, nitrogen regulation response regulat	XF37_17900	-1.42284	0.0267734	glnG	nitrogen regulation protein NR(I)
KKF82443.1	nitrogen regulation protein NR(II)	glnL	K07708	278.6	460.6	1.5e-138	two-component system, NtrC family, nitrogen regulation sensor histidine	XF37_17895	-1.43788	0.0055038	glnL	nitrogen regulation protein NR(II)
KKF81909.1	N-acetyl-gamma-glutamyl-phosphate reductase		K00145	130.17	395	1.3e-118	N-acetyl-gamma-glutamyl-phosphate reductase [EC:1.2.1.38]	XF37_20265	-1.44736	0.000788826		N-acetyl-gamma-glutamyl-phosphate reductase
KKF80458.1	L-galactonate transporter		K23016	824.9	890.9	4e-269	MFS transporter, ACS family, L-galactonate transporter	XF37_27055	-1.59428	0.0425769		L-galactonate transporter
KKF82181.1	ammonium transporter		K03320	140.13	453.4	3.7e-136	ammonium transporter, Amt family	XF37_18630	-1.61659	0.00969337		ammonium transporter
KKF82292.1	sugar ABC transporter ATP-binding protein		K10441	708.03	619	4.8e-186	ribose transport system ATP-binding protein [EC:7.5.2.7]	XF37_18285	-1.62866	0.0365994		sugar ABC transporter ATP-binding protein
KKF81720.1	acetylornithine aminotransferase	argD	K00840	705.33	688.7	5.4e-208	succinylornithine aminotransferase [EC:2.6.1.81]	XF37_22190	-1.68996	0.000125568	argD	acetylornithine aminotransferase
KKF82060.1	arginine ABC transporter substrate-binding protein		K09996	365.1	397.9	4.2e-120	arginine transport system substrate-binding protein	XF37_19605	-1.74215	1.95921e-05		arginine ABC transporter substrate-binding protein
KKF82291.1	LacI family transcriptional regulator		K02058	203.5	219	3.8e-65	simple sugar transport system substrate-binding protein	XF37_18280	-1.77388	6.27949e-05		LacI family transcriptional regulator
KKF83936.1	ornithine carbamoyltransferase		K00611	319.53	492.7	3.2e-148	ornithine carbamoyltransferase [EC:2.1.3.3]	XF37_10910	-2.01813	0.000229816		ornithine carbamoyltransferase
KKF84316.1	oxidoreductase		K00123	833.4	333.1	1.1e-99	formate dehydrogenase major subunit [EC:1.17.1.9]	XF37_07605	-2.02345	0.0107851		oxidoreductase
KKF80433.1	phosphotransferase		K07559	145.47	82.9	8.9e-24	putative RNA 2'-phosphotransferase [EC:2.7.1.-]	XF37_26915	-2.27243	0.0118066		phosphotransferase
KKF84911.1	O-antigen length regulator		K05789	243.93	213.7	1.2e-63	chain length determinant protein (polysaccharide antigen chain regulato	XF37_05075	-2.35977	0.0425769		O-antigen length regulator
KKF84408.1	multidrug transporter		K07797	662.37	800	7.9e-242	multidrug resistance protein K	XF37_07315	-2.4182	0.0175765		multidrug transporter
KKF82537.1	hypothetical protein		K09712	30.63	22.9	2e-05	uncharacterized protein	XF37_16745	-2.54333	0.0030359		hypothetical protein
KKF81175.1	ABC transporter ATP-binding protein		K02016	93.4	109	8.1e-32	iron complex transport system substrate-binding protein	XF37_23965	-2.56541	0.00188326		ABC transporter ATP-binding protein
KKF84063.1	AraC family transcriptional regulator		K18991	259.27	43.3	9.2e-12	AraC family transcriptional regulator, activator of mtrCDE	XF37_08510	-2.5826	0.0314095		AraC family transcriptional regulator
KKF80524.1	fimbrial protein		K07345	95.87	56.6	1.1e-15	major type 1 subunit fimbrin (pilin)	XF37_27430	-2.61339	0.0406395		fimbrial protein
KKF80419.1	gluconate permease		K16321	550.97	695.7	8.5e-210	high-affinity gluconate transporter	XF37_26835	-2.65081	0.0055038		gluconate permease
KKF84721.1	transposase		K07493	61.33	92.1	1.1e-26	putative transposase	XF37_05650	-2.73396	0.00370269		transposase
KKF81359.1	ribonucleoside hydrolase	rihB	K10213	414.6	491	4e-148	ribosylpyrimidine nucleosidase [EC:3.2.2.8]	XF37_23395	-2.92274	0.001896	rihB	ribonucleoside hydrolase
KKF80825.1	allantoin permease		K10975	597.63	797	1.5e-240	allantoin permease	XF37_25985	-2.98596	0.00592639		allantoin permease
KKF81631.1	membrane protein		K23424	174.57	35.4	1.5e-09	protein O-mannosyl-transferase [EC:2.4.1.-]	XF37_21730	-3.0945	0.00194789		membrane protein
KKF84362.1	damage-inducible protein DinI		K12149	45.1	90.7	2.1e-26	DNA-damage-inducible protein I	XF37_07850	-3.09954	0.00152887		damage-inducible protein DinI
KKF84405.1	CoA-transferase		K18702	466.7	89.9	4.6e-26	CoA:oxalate CoA-transferase [EC:2.8.3.19]	XF37_07295	-3.15562	0.0125317		CoA-transferase
KKF81695.1	DNA utilization protein HofO		K12290	57.17	138.2	7.4e-41	pilus assembly protein HofO	XF37_22060	-3.46481	0.00119311		DNA utilization protein HofO
KKF83160.1	short chain acyl-CoA synthetase		K12507	606.93	729.1	9.3e-220	acyl-CoA synthetase [EC:6.2.1.-]	XF37_14480	-3.46981	0.000316212		short chain acyl-CoA synthetase
KKF85719.1	GntR family transcriptional regulator		K03482	262.67	373.4	8.5e-113	GntR family transcriptional regulator, glv operon transcriptional regul	XF37_00405	-3.48078	0.00267528		GntR family transcriptional regulator
KKF84946.1	oxidoreductase		K16066	377.6	229.9	1.7e-68	3-hydroxy acid dehydrogenase / malonic semialdehyde reductase [EC:1.1.1	XF37_04365	-3.50703	0.000125568		oxidoreductase
KKF84403.1	oxalyl-CoA decarboxylase		K01577	824.4	989.4	1.5e-298	oxalyl-CoA decarboxylase [EC:4.1.1.8]	XF37_07285	-3.6469	0.00108209		oxalyl-CoA decarboxylase
KKF84402.1	formyl-coenzyme A transferase		K07749	479.1	577.1	5.2e-174	formyl-CoA transferase [EC:2.8.3.16]	XF37_07280	-3.81476	0.00108209		formyl-coenzyme A transferase
KKF84404.1	transporter YfdV		K13936	192.6	229.7	1.2e-68	malonate transporter and related proteins	XF37_07290	-5.10784	0.000152346		transporter YfdV

## Sheet: O157H7_Ls-4hpi
Dataset S12. KEGG protein IDs assigned to each differentially expressed gene (DEG) using the KofamKOALA blast tool (https://www.genome.jp/tools/kofamkoala/) with a threshold E-value <10E-5. Protein accession, description, and symbol are shown, together with the corresponding KEGG ID and the blast result values [threshold, HMM (Hidden Markov Model) score, and E-value]. Information on DEGs correspo…
Protein accession	Protein description	Symbol	Kegg ID	Threshold	HMM Score	E-value	Kegg description	Gene ID	Log2FC	Adj.P.Val	Gene Name	Gene description
KKF82182.1	nitrogen regulatory protein P-II 1		K04752	194.27	202.4	6.3e-61	nitrogen regulatory protein P-II 2	XF37_18635	11.3169	6.86713e-16		nitrogen regulatory protein P-II 1
KKF81985.1	NAD(P)H-dependent FMN reductase		K00299	96.63	176.5	2.8e-52	FMN reductase [EC:1.5.1.38]	XF37_19205	10.3749	8.27825e-16		NAD(P)H-dependent FMN reductase
KKF84533.1	pyrimidine monooxygenase		K09018	335.23	638.7	9.6e-193	pyrimidine oxygenase [EC:1.14.99.46]	XF37_06875	9.78261	1.88471e-14		pyrimidine monooxygenase
KKF84482.1	aminoacrylate peracid reductase		K09021	139.97	234.4	8.1e-71	aminoacrylate peracid reductase	XF37_06865	9.41958	6.86713e-16		aminoacrylate peracid reductase
KKF84532.1	amidohydrolase		K09020	216.1	294.6	3.5e-88	ureidoacrylate peracid hydrolase [EC:3.5.1.110]	XF37_06870	9.17796	1.40142e-12		amidohydrolase
KKF81987.1	alkanesulfonate monooxygenase		K04091	335.63	648.9	1.3e-195	alkanesulfonate monooxygenase [EC:1.14.14.5]	XF37_19215	8.52294	1.55363e-11		alkanesulfonate monooxygenase
KKF81986.1	alkanesulfonate transporter substrate-binding subunit		K15553	211.97	395.7	8.7e-119	sulfonate transport system substrate-binding protein	XF37_19210	8.39299	2.29876e-15		alkanesulfonate transporter substrate-binding subunit
KKF82181.1	ammonium transporter		K03320	140.13	453.4	3.7e-136	ammonium transporter, Amt family	XF37_18630	8.39285	2.91872e-14		ammonium transporter
KKF82334.1	taurine transporter subunit		K15552	274.67	369.5	3.6e-111	taurine transport system permease protein	XF37_18510	7.96278	2.45474e-12		taurine transporter subunit
KKF80998.1	carbon-phosphorus lyase complex subunit	phnH	K06165	133.6	267.1	6.1e-80	alpha-D-ribose 1-methylphosphonate 5-triphosphate synthase subunit PhnH	XF37_24920	7.60203	8.79626e-15	phnH	carbon-phosphorus lyase complex subunit
KKF81988.1	alkanesulfonate transporter permease subunit	ssuC	K15554	280.67	359.1	1e-107	sulfonate transport system permease protein	XF37_19220	7.5521	4.00975e-11	ssuC	alkanesulfonate transporter permease subunit
KKF84481.1	aminoacrylate hydrolase		K09023	215.3	390.4	1.2e-117	aminoacrylate hydrolase [EC:3.5.1.-]	XF37_06860	7.52365	3.2407e-13		aminoacrylate hydrolase
KKF82332.1	taurine ABC transporter substrate-binding protein	tauA	K15551	224.63	449.9	1.6e-135	taurine transport system substrate-binding protein	XF37_18500	7.28944	1.3113e-11	tauA	taurine ABC transporter substrate-binding protein
KKF80822.1	glyoxylate carboligase		K01608	686.37	1136.9	0	tartronate-semialdehyde synthase [EC:4.1.1.47]	XF37_25970	7.09237	3.12338e-10		glyoxylate carboligase
KKF82333.1	taurine transporter ATP-binding subunit	tauB	K10831	337.43	381.2	7.4e-115	taurine transport system ATP-binding protein [EC:7.6.2.7]	XF37_18505	7.08456	5.01476e-11	tauB	taurine transporter ATP-binding subunit
KKF80823.1	hydroxypyruvate isomerase		K01816	144.1	353.6	4.7e-106	hydroxypyruvate isomerase [EC:5.3.1.22]	XF37_25975	7.05817	7.07616e-14		hydroxypyruvate isomerase
KKF84480.1	malonic semialdehyde reductase		K09019	159.1	298.2	7.8e-90	3-hydroxypropanoate dehydrogenase [EC:1.1.1.-]	XF37_06855	7.05616	2.65205e-11		malonic semialdehyde reductase
KKF82335.1	taurine dioxygenase	tauD	K03119	337.93	444.1	1.3e-133	taurine dioxygenase [EC:1.14.11.17]	XF37_18515	7.0556	1.12752e-12	tauD	taurine dioxygenase
KKF84479.1	FMN reductase		K09024	214.37	255	1.2e-76	flavin reductase [EC:1.5.1.-]	XF37_06850	7.05065	3.08711e-13		FMN reductase
KKF81989.1	aliphatic sulfonates transport ATP-binding subunit	ssuB	K15555	319.93	354.8	1.4e-106	sulfonate transport system ATP-binding protein [EC:7.6.2.14]	XF37_19225	6.96215	1.00053e-11	ssuB	aliphatic sulfonates transport ATP-binding subunit
KKF81001.1	alkylphosphonate ABC transporter substrate-binding protein		K02044	112.13	263.9	1e-78	phosphonate transport system substrate-binding protein	XF37_24940	6.94763	2.26575e-12		alkylphosphonate ABC transporter substrate-binding protein
KKF81002.1	phosphonate ABC transporter ATP-binding protein		K02041	268.67	382.4	9.9e-115	phosphonate transport system ATP-binding protein [EC:7.3.2.2]	XF37_24945	6.87112	2.65205e-11		phosphonate ABC transporter ATP-binding protein
KKF80994.1	phosphonate ABC transporter ATP-binding protein		K05780	229.2	386.9	9.1e-117	alpha-D-ribose 1-methylphosphonate 5-triphosphate synthase subunit PhnL	XF37_24900	6.85591	8.9452e-10		phosphonate ABC transporter ATP-binding protein
KKF80995.1	phosphonate C-P lyase system protein PhnK	phnK	K05781	289.67	497.8	1.7e-149	putative phosphonate transport system ATP-binding protein	XF37_24905	6.82253	2.45066e-12	phnK	phosphonate C-P lyase system protein PhnK
KKF82442.1	glutamine synthetase	glnA	K20712	1022.87	825.2	3.4e-249	3-(hydroxyamino)phenol mutase [EC:5.4.4.3]	XF37_17890	6.82159	1.88471e-14	glnA	glutamine synthetase
KKF80999.1	phosphonate C-P lyase		K06166	58.83	206.7	9.3e-62	alpha-D-ribose 1-methylphosphonate 5-triphosphate synthase subunit PhnG	XF37_24925	6.66686	3.95058e-12		phosphonate C-P lyase
KKF81000.1	phosphonate metabolism transcriptional regulator PhnF		K02043	205.13	275.8	8.1e-83	GntR family transcriptional regulator, phosphonate transport system reg	XF37_24930	6.53661	7.61764e-11		phosphonate metabolism transcriptional regulator PhnF
KKF81101.1	phosphonate ABC transporter permease		K02042	116.63	353	8.5e-106	phosphonate transport system permease protein	XF37_24935	6.47792	2.45066e-12		phosphonate ABC transporter permease
KKF80993.1	phosphonate metabolism protein PhnM		K06162	147.3	510.1	1.1e-153	alpha-D-ribose 1-methylphosphonate 5-triphosphate diphosphatase [EC:3.6	XF37_24895	6.45993	1.59811e-12		phosphonate metabolism protein PhnM
KKF80824.1	tartronate semialdehyde reductase		K00042	393.3	422.6	3.3e-127	2-hydroxy-3-oxopropionate reductase [EC:1.1.1.60]	XF37_25980	6.43267	1.47282e-12		tartronate semialdehyde reductase
KKF84775.1	aspartate kinase		K00928	393.97	410.2	4e-123	aspartate kinase [EC:2.7.2.4]	XF37_05470	6.27954	2.45066e-12		aspartate kinase
KKF80566.1	ribulose 5-phosphate epimerase	araD	K03077	214.67	286.8	1e-85	L-ribulose-5-phosphate 4-epimerase [EC:5.1.3.4]	XF37_27650	6.22894	6.80914e-13	araD	ribulose 5-phosphate epimerase
KKF80996.1	hypothetical protein		K06163	354.4	560.3	5.2e-169	alpha-D-ribose 1-methylphosphonate 5-phosphate C-P lyase [EC:4.7.1.1]	XF37_24910	6.18572	8.41727e-13		hypothetical protein
KKF80997.1	carbon-phosphorus lyase complex subunit PhnI		K06164	194.13	568.4	1.6e-171	alpha-D-ribose 1-methylphosphonate 5-triphosphate synthase subunit PhnI	XF37_24915	5.98936	1.46343e-11		carbon-phosphorus lyase complex subunit PhnI
KKF80567.1	sugar isomerase		K01804	157.23	799.4	2.9e-241	L-arabinose isomerase [EC:5.3.1.4]	XF37_27655	5.85147	1.30244e-11		sugar isomerase
KKF81925.1	5,10-methylenetetrahydrofolate reductase	metF	K00297	164.67	363.3	7.4e-109	methylenetetrahydrofolate reductase (NADPH) [EC:1.5.1.20]	XF37_20350	5.83902	3.76294e-09	metF	5,10-methylenetetrahydrofolate reductase
KKF80568.1	ribulokinase		K00853	340.9	946.1	4.6e-285	L-ribulokinase [EC:2.7.1.16]	XF37_27660	5.80163	6.4818e-10		ribulokinase
KKF85758.1	phosphate ABC transporter substrate-binding protein		K02040	58.47	234.5	9.1e-70	phosphate transport system substrate-binding protein	XF37_00620	5.25326	1.85377e-11		phosphate ABC transporter substrate-binding protein
KKF81531.1	nitrogen assimilation transcriptional regulator		K19338	274.07	313.4	8.5e-94	LysR family transcriptional regulator, nitrogen assimilation regulatory	XF37_22335	5.00145	3.14886e-09		nitrogen assimilation transcriptional regulator
KKF83691.1	glutamate synthase	gltB	K00265	2016.53	2145.5	0	glutamate synthase (NADPH) large chain [EC:1.4.1.13]	XF37_11335	4.97306	7.91746e-12	gltB	glutamate synthase
KKF85260.1	hypothetical protein		K01657	472.13	541.1	1.5e-162	anthranilate synthase component I [EC:4.1.3.27]	XF37_03575	4.94306	5.61647e-10		hypothetical protein
KKF80820.1	ureidoglycolate hydrolase		K01483	44.3	209.6	1.7e-62	ureidoglycolate lyase [EC:4.3.2.3]	XF37_25960	4.74699	2.05647e-08		ureidoglycolate hydrolase
KKF82151.1	8-amino-7-oxononanoate synthase		K00652	447.7	510.1	2e-153	8-amino-7-oxononanoate synthase [EC:2.3.1.47]	XF37_20080	4.67476	6.68419e-08		8-amino-7-oxononanoate synthase
KKF80825.1	allantoin permease		K10975	597.63	797	1.5e-240	allantoin permease	XF37_25985	4.64663	3.35859e-07		allantoin permease
KKF83472.1	glutamate synthase		K00266	510.57	637.6	7.5e-192	glutamate synthase (NADPH) small chain [EC:1.4.1.13]	XF37_11330	4.53229	6.44764e-09		glutamate synthase
KKF84733.1	terminase		K21512	243.87	209.1	3.2e-62	terminase, large subunit [EC:3.1.21.4]	XF37_05625	4.37334	0.00664627		terminase
KKF85632.1	hypothetical protein		K01356	134.7	70.4	6.7e-20	repressor LexA [EC:3.4.21.88]	XF37_00805	4.37334	3.98033e-05		hypothetical protein
KKF85553.1	transcriptional regulator		K03576	222.63	457.6	6.1e-138	LysR family transcriptional regulator, regulator for metE and metH	XF37_01045	4.30368	6.49579e-10		transcriptional regulator
KKF84122.1	N-acetylglutamate synthase		K14682	235.37	703.6	1.1e-211	amino-acid N-acetyltransferase [EC:2.3.1.1]	XF37_08835	4.29982	5.49626e-06		N-acetylglutamate synthase
KKF82291.1	LacI family transcriptional regulator		K02058	203.5	219	3.8e-65	simple sugar transport system substrate-binding protein	XF37_18280	4.19883	5.27377e-10		LacI family transcriptional regulator
KKF81629.1	leucine/isoleucine/valine transporter permease subunit	livM	K01998	253	391	3.3e-117	branched-chain amino acid transport system permease protein	XF37_21715	4.14679	1.66668e-08	livM	leucine/isoleucine/valine transporter permease subunit
KKF83936.1	ornithine carbamoyltransferase		K00611	319.53	492.7	3.2e-148	ornithine carbamoyltransferase [EC:2.1.3.3]	XF37_10910	4.0707	4.93304e-06		ornithine carbamoyltransferase
KKF82464.1	nitrogen regulation protein NR(I)	glnG	K07712	591.53	786.6	3.4e-237	two-component system, NtrC family, nitrogen regulation response regulat	XF37_17900	4.03897	1.75506e-06	glnG	nitrogen regulation protein NR(I)
KKF82443.1	nitrogen regulation protein NR(II)	glnL	K07708	278.6	460.6	1.5e-138	two-component system, NtrC family, nitrogen regulation sensor histidine	XF37_17895	4.02939	5.57284e-09	glnL	nitrogen regulation protein NR(II)
KKF85261.1	glutamine amidotransferase		K13497	599.8	779.3	5.2e-235	anthranilate synthase/phosphoribosyltransferase [EC:4.1.3.27 2.4.2.18]	XF37_03580	4.00291	3.17422e-06		glutamine amidotransferase
KKF85552.1	5-methyltetrahydropteroyltriglutamate--homocysteine methyltransferase		K00549	51.6	791.2	1.9e-238	5-methyltetrahydropteroyltriglutamate--homocysteine methyltransferase [	XF37_01040	3.99563	2.35634e-07		5-methyltetrahydropteroyltriglutamate--homocysteine methyltransferase
KKF82152.1	biotin synthase		K01012	167.97	588.9	1.9e-177	biotin synthase [EC:2.8.1.6]	XF37_20085	3.98656	1.87951e-05		biotin synthase
KKF84687.1	porin		K11929	506.63	558	3.4e-168	outer membrane pore protein E	XF37_05735	3.93416	5.07137e-08		porin
KKF82150.1	biotin biosynthesis protein BioC		K02169	170.13	292.2	1.8e-87	malonyl-CoA O-methyltransferase [EC:2.1.1.197]	XF37_20075	3.93375	3.36231e-08		biotin biosynthesis protein BioC
KKF81630.1	leucine/isoleucine/valine transporter ATP-binding subunit	livG	K01995	323.27	445	1.6e-133	branched-chain amino acid transport system ATP-binding protein	XF37_21720	3.86287	5.52755e-06	livG	leucine/isoleucine/valine transporter ATP-binding subunit
KKF80393.1	N-acetylneuraminate epimerase		K17948	306.07	84.6	1.6e-24	N-acetylneuraminate epimerase [EC:5.1.3.24]	XF37_26690	3.78573	0.000190203		N-acetylneuraminate epimerase
KKF85757.1	phosphate transporter permease subunit PstC	pstC	K02037	259.17	352.3	2e-105	phosphate transport system permease protein	XF37_00615	3.7587	8.87033e-05	pstC	phosphate transporter permease subunit PstC
KKF81628.1	branched-chain amino acid transporter permease subunit LivH		K01997	148.2	332.8	1.1e-99	branched-chain amino acid transport system permease protein	XF37_21710	3.70525	2.46213e-07		branched-chain amino acid transporter permease subunit LivH
KKF84388.1	PTS fructose transporter subunit IIB		K11202	134.8	149.5	9.2e-45	fructose-like PTS system EIIB component [EC:2.7.1.-]	XF37_07210	3.6837	1.35474e-06		PTS fructose transporter subunit IIB
KKF82811.1	acetyltransferase		K03829	95.93	219.8	1.7e-65	putative acetyltransferase [EC:2.3.1.-]	XF37_15540	3.66327	2.62527e-07		acetyltransferase
KKF81627.1	leucine ABC transporter substrate-binding protein		K01999	166.7	271.3	6.1e-81	branched-chain amino acid transport system substrate-binding protein	XF37_21705	3.63221	7.06699e-07		leucine ABC transporter substrate-binding protein
KKF84629.1	adhesin		K19233	105.77	77.8	3.4e-22	ECM component-binding autotransporter adhesin	XF37_06050	3.62592	3.70728e-07		adhesin
KKF81744.1	leucine/isoleucine/valine transporter ATP-binding subunit	livF	K01996	328.4	423.6	4.9e-127	branched-chain amino acid transport system ATP-binding protein	XF37_21725	3.57232	2.75331e-06	livF	leucine/isoleucine/valine transporter ATP-binding subunit
KKF84795.1	homoserine O-succinyltransferase		K00651	262.33	470.6	2.4e-141	homoserine O-succinyltransferase/O-acetyltransferase [EC:2.3.1.46 2.3.1	XF37_05570	3.55104	3.42967e-06		homoserine O-succinyltransferase
KKF83422.1	amino acid ABC transporter substrate-binding protein		K09969	324.1	609.3	1.2e-183	general L-amino acid transport system substrate-binding protein	XF37_11070	3.52802	1.78469e-08		amino acid ABC transporter substrate-binding protein
KKF85292.1	transporter		K08172	485.07	460.8	1.6e-138	MFS transporter, MHS family, shikimate and dehydroshikimate transport p	XF37_02545	3.47809	3.28389e-06		transporter
KKF85754.1	transcriptional regulator PhoU		K02039	115.33	268	4.9e-80	phosphate transport system protein	XF37_00600	3.43202	1.0092e-07		transcriptional regulator PhoU
KKF81143.1	xanthine permease XanP		K16345	576.47	703.3	3.7e-212	xanthine permease XanP	XF37_24360	3.41327	5.61265e-05		xanthine permease XanP
KKF83420.1	amino acid ABC transporter permease		K09971	300.5	541.8	6.5e-163	general L-amino acid transport system permease protein	XF37_11060	3.41141	6.13292e-07		amino acid ABC transporter permease
KKF83421.1	amino acid ABC transporter permease		K09970	183.63	569	3.6e-171	general L-amino acid transport system permease protein	XF37_11065	3.4002	1.0092e-07		amino acid ABC transporter permease
KKF80361.1	zinc resistance protein	zraP	K07803	80.67	201.8	3.5e-60	zinc resistance-associated protein	XF37_28550	3.39121	1.27533e-06	zraP	zinc resistance protein
KKF83419.1	ABC transporter ATP-binding protein		K09972	447.93	486.2	1.1e-146	general L-amino acid transport system ATP-binding protein [EC:7.4.2.1]	XF37_11055	3.38265	1.94213e-08		ABC transporter ATP-binding protein
KKF81909.1	N-acetyl-gamma-glutamyl-phosphate reductase		K00145	130.17	395	1.3e-118	N-acetyl-gamma-glutamyl-phosphate reductase [EC:1.2.1.38]	XF37_20265	3.37421	3.76137e-05		N-acetyl-gamma-glutamyl-phosphate reductase
KKF84389.1	PTS fructose transporter subunit IIC		K11203	464.87	384.8	1.6e-115	fructose-like PTS system EIIC or EIIBC or EIIABC component	XF37_07215	3.36257	1.63654e-05		PTS fructose transporter subunit IIC
KKF85756.1	phosphate transporter permease subunit PtsA	pstA	K02038	247.93	306	1.2e-91	phosphate transport system permease protein	XF37_00610	3.35464	0.000666236	pstA	phosphate transporter permease subunit PtsA
KKF84573.1	sugar ABC transporter substrate-binding protein		K10537	442.4	521.5	2.5e-157	L-arabinose transport system substrate-binding protein	XF37_06620	3.32699	6.3373e-07		sugar ABC transporter substrate-binding protein
KKF84396.1	glutamate-pyruvate aminotransferase		K14261	525.63	717.2	1.6e-216	alanine-synthesizing transaminase [EC:2.6.1.-]	XF37_07250	3.2249	0.000535242		glutamate-pyruvate aminotransferase
KKF83983.1	S-adenosylmethionine synthetase		K00789	18.33	694.8	2.5e-209	S-adenosylmethionine synthetase [EC:2.5.1.6]	XF37_08075	3.16607	9.95658e-07		S-adenosylmethionine synthetase
KKF84897.1	methionine aminotransferase		K14287	433.7	622.9	5e-188	methionine transaminase [EC:2.6.1.88]	XF37_05005	3.15762	0.000100081		methionine aminotransferase
KKF82391.1	sulfate transporter subunit		K23163	485.7	563.5	7.4e-170	sulfate/thiosulfate transport system substrate-binding protein	XF37_17600	3.14138	0.000226635		sulfate transporter subunit
KKF84362.1	damage-inducible protein DinI		K12149	45.1	90.7	2.1e-26	DNA-damage-inducible protein I	XF37_07850	3.13895	4.32436e-06		damage-inducible protein DinI
KKF82239.1	transcriptional regulator PhoB		K07657	297.33	371.8	8.1e-112	two-component system, OmpR family, phosphate regulon response regulator	XF37_18920	3.10013	7.64379e-06		transcriptional regulator PhoB
KKF80701.1	DL-methionine transporter ATP-binding subunit	metN	K02071	328.27	514.9	5.9e-155	D-methionine transport system ATP-binding protein	XF37_28345	3.0829	3.62866e-05	metN	DL-methionine transporter ATP-binding subunit
KKF81928.1	cystathionine gamma-synthase		K01758	591.6	471	1.1e-141	cystathionine gamma-lyase [EC:4.4.1.1]	XF37_20365	3.07368	7.75619e-05		cystathionine gamma-synthase
KKF83807.1	phosphoribosylaminoimidazole synthetase		K01933	161.5	638	6e-192	phosphoribosylformylglycinamidine cyclo-ligase [EC:6.3.3.1]	XF37_10215	3.05727	0.000474729		phosphoribosylaminoimidazole synthetase
KKF81933.1	transposase		K07480	44	89.5	1.1e-25	insertion element IS1 protein InsB	XF37_20390	3.01204	3.84686e-05		transposase
KKF85755.1	phosphate ABC transporter ATP-binding protein		K02036	261.97	446.1	2e-134	phosphate transport system ATP-binding protein [EC:7.3.2.1]	XF37_00605	3.00919	5.44669e-06		phosphate ABC transporter ATP-binding protein
KKF83097.1	hypothetical protein		K23242	62.07	265.7	1.8e-79	manganese efflux pump family protein	XF37_15125	2.98009	0.00487808		hypothetical protein
KKF81908.1	acetylglutamate kinase		K00930	215.67	240.3	9.4e-72	acetylglutamate kinase [EC:2.7.2.8]	XF37_20260	2.96872	0.00102594		acetylglutamate kinase
KKF81720.1	acetylornithine aminotransferase	argD	K00840	705.33	688.7	5.4e-208	succinylornithine aminotransferase [EC:2.6.1.81]	XF37_22190	2.96028	7.75619e-05	argD	acetylornithine aminotransferase
KKF81532.1	transcriptional regulator Cbl	cbl	K13635	458.93	523.7	4.2e-158	LysR family transcriptional regulator, cys regulon transcriptional acti	XF37_22340	2.92266	6.26459e-05	cbl	transcriptional regulator Cbl
KKF85611.1	acetolactate synthase catalytic subunit		K01652	457.7	764.5	3.2e-230	acetolactate synthase I/II/III large subunit [EC:2.2.1.6]	XF37_01365	2.88879	2.28759e-05		acetolactate synthase catalytic subunit
KKF82292.1	sugar ABC transporter ATP-binding protein		K10441	708.03	619	4.8e-186	ribose transport system ATP-binding protein [EC:7.5.2.7]	XF37_18285	2.87899	1.22479e-05		sugar ABC transporter ATP-binding protein
KKF83260.1	isomerase YbhH		K16514	389.9	490.1	9e-148	4-oxalomesaconate tautomerase [EC:5.3.2.8]	XF37_13545	2.8648	0.00217584		isomerase YbhH
KKF85004.1	3-oxoacyl-ACP synthase		K09458	474.67	403.7	4.5e-121	3-oxoacyl-[acyl-carrier-protein] synthase II [EC:2.3.1.179]	XF37_03920	2.85735	0.000110739		3-oxoacyl-ACP synthase
KKF84898.1	oxidoreductase		K08317	334.67	521.1	3.3e-157	hydroxycarboxylate dehydrogenase A [EC:1.1.1.-]	XF37_05010	2.8568	0.000312335		oxidoreductase
KKF84390.1	aminopeptidase		K08326	476.3	692	5.2e-209	aminopeptidase [EC:3.4.11.-]	XF37_07220	2.84907	5.34598e-05		aminopeptidase
KKF81623.1	leucine ABC transporter substrate-binding protein		K01999	166.7	260.9	8.5e-78	branched-chain amino acid transport system substrate-binding protein	XF37_21685	2.81575	5.15465e-05		leucine ABC transporter substrate-binding protein
KKF83556.1	alpha-dehydro-beta-deoxy-D-glucarate aldolase		K01630	338.7	409.4	1.5e-123	2-dehydro-3-deoxyglucarate aldolase [EC:4.1.2.20]	XF37_11785	2.7897	6.64126e-05		alpha-dehydro-beta-deoxy-D-glucarate aldolase
KKF81350.1	hypothetical protein		K06940	31.53	49.6	9.6e-14	uncharacterized protein	XF37_23350	2.77951	0.000164003		hypothetical protein
KKF83555.1	galactonate transporter		K12299	753.07	854.4	5.7e-258	MFS transporter, ACS family, probable galactarate transporter	XF37_11780	2.76963	1.44983e-05		galactonate transporter
KKF83689.1	transposase		K07484	14.6	55.8	1.7e-15	transposase	XF37_12490	2.72016	0.000193706		transposase
KKF83033.1	glutamate dehydrogenase		K00262	486.87	775.6	1.3e-233	glutamate dehydrogenase (NADP+) [EC:1.4.1.4]	XF37_14790	2.70651	6.41793e-06		glutamate dehydrogenase
KKF85372.1	glycosyl transferase		K19354	214.8	353.3	8.7e-106	heptose III glucuronosyltransferase [EC:2.4.1.-]	XF37_02145	2.69688	4.79092e-05		glycosyl transferase
KKF85262.1	tryptophan synthase subunit beta		K01696	638.33	679.3	9.8e-205	tryptophan synthase beta chain [EC:4.2.1.20]	XF37_03590	2.68561	4.21832e-05		tryptophan synthase subunit beta
KKF81294.1	ribonucleotide-diphosphate reductase subunit alpha		K00525	115.1	401.5	2.3e-120	ribonucleoside-diphosphate reductase alpha chain [EC:1.17.4.1]	XF37_23050	2.66873	0.00302755		ribonucleotide-diphosphate reductase subunit alpha
KKF85263.1	tryptophan synthase subunit alpha		K01695	86.27	354.3	3.3e-106	tryptophan synthase alpha chain [EC:4.2.1.20]	XF37_03595	2.66279	0.000553269		tryptophan synthase subunit alpha
KKF82729.1	D-alanyl-D-alanine dipeptidase		K08641	54.27	211.7	5.3e-63	zinc D-Ala-D-Ala dipeptidase [EC:3.4.13.22]	XF37_15960	2.65996	0.000162581		D-alanyl-D-alanine dipeptidase
KKF80460.1	galactonate oxidoreductase		K23007	409.83	643.9	1.7e-194	L-galactonate 5-dehydrogenase [EC:1.1.1.414]	XF37_27065	2.65262	0.000463558		galactonate oxidoreductase
KKF83584.1	glucuronate isomerase		K01812	229.93	694.1	7.3e-209	glucuronate isomerase [EC:5.3.1.12]	XF37_11935	2.63825	0.000687946		glucuronate isomerase
KKF80534.1	dihydrodipicolinate reductase		K00215	135.8	317.1	5.3e-95	4-hydroxy-tetrahydrodipicolinate reductase [EC:1.17.1.8]	XF37_27480	2.63478	6.73678e-05		dihydrodipicolinate reductase
KKF85276.1	indole-3-glycerol phosphate synthase		K13498	404.93	696.5	4.2e-210	indole-3-glycerol phosphate synthase / phosphoribosylanthranilate isome	XF37_03585	2.62584	7.06918e-05		indole-3-glycerol phosphate synthase
KKF81631.1	membrane protein		K23424	174.57	35.4	1.5e-09	protein O-mannosyl-transferase [EC:2.4.1.-]	XF37_21730	2.59286	0.00084098		membrane protein
KKF83769.1	inositol monophosphatase		K01092	207.97	343.6	7.3e-103	myo-inositol-1(or 4)-monophosphatase [EC:3.1.3.25]	XF37_10020	2.55282	0.00242504		inositol monophosphatase
KKF82149.1	dethiobiotin synthetase	bioD	K01935	120.6	281.3	3.6e-84	dethiobiotin synthetase [EC:6.3.3.3]	XF37_20070	2.5367	0.000703162	bioD	dethiobiotin synthetase
KKF85610.1	acetolactate synthase 2 regulatory subunit	ilvM	K11258	58.87	115.1	3e-34	acetolactate synthase II small subunit [EC:2.2.1.6]	XF37_01360	2.50965	0.000703162	ilvM	acetolactate synthase 2 regulatory subunit
KKF84572.1	L-arabinose transporter ATP-binding protein	araG	K10539	685.03	872.2	2.1e-263	L-arabinose transport system ATP-binding protein [EC:7.5.2.12]	XF37_06615	2.49003	0.000213895	araG	L-arabinose transporter ATP-binding protein
KKF84135.1	sugar isomerase	fucI	K01818	298.37	1016.1	0	L-fucose/D-arabinose isomerase [EC:5.3.1.25 5.3.1.3]	XF37_08915	2.4794	0.000435343	fucI	sugar isomerase
KKF82238.1	phosphate regulon sensor protein	phoR	K07636	313.77	339.1	1.3e-101	two-component system, OmpR family, phosphate regulon sensor histidine k	XF37_18915	2.46711	0.00024447	phoR	phosphate regulon sensor protein
KKF83508.1	argininosuccinate synthase		K01940	138.33	363.3	8.3e-109	argininosuccinate synthase [EC:6.3.4.5]	XF37_11535	2.4423	0.00039693		argininosuccinate synthase
KKF85746.1	adenine permease PurP		K06901	104.47	540.9	9.9e-163	adenine/guanine/hypoxanthine permease	XF37_00555	2.40852	0.00404151		adenine permease PurP
KKF81907.1	argininosuccinate lyase		K14681	1008.7	863.5	2.4e-260	argininosuccinate lyase / amino-acid N-acetyltransferase [EC:4.3.2.1 2.	XF37_20255	2.37597	0.000101734		argininosuccinate lyase
KKF85609.1	branched-chain amino acid aminotransferase		K00826	186.4	329.3	1.2e-98	branched-chain amino acid aminotransferase [EC:2.6.1.42]	XF37_01355	2.34313	0.00541389		branched-chain amino acid aminotransferase
KKF82271.1	hypothetical protein		K18928	266.33	338	1.2e-101	L-lactate dehydrogenase complex protein LldE	XF37_18140	2.32815	0.00216232		hypothetical protein
KKF83585.1	altronate hydrolase		K01685	556.1	684.4	2.6e-206	altronate hydrolase [EC:4.2.1.7]	XF37_11940	2.30869	0.000353768		altronate hydrolase
KKF82787.1	cell division inhibition protein DicB		K22304	100.67	94.4	7.8e-28	cell division inhibition protein DicB	XF37_15850	2.27622	0.0179141		cell division inhibition protein DicB
KKF82643.1	ATP phosphoribosyltransferase	hisG	K00765	133.07	316.7	9.2e-95	ATP phosphoribosyltransferase [EC:2.4.2.17]	XF37_17295	2.27373	0.00167195	hisG	ATP phosphoribosyltransferase
KKF83913.1	sugar ABC transporter permease		K23509	332.03	452.2	3.6e-136	galactofuranose transport system permease protein	XF37_10795	2.27347	0.000203039		sugar ABC transporter permease
KKF82060.1	arginine ABC transporter substrate-binding protein		K09996	365.1	397.9	4.2e-120	arginine transport system substrate-binding protein	XF37_19605	2.27269	0.00549378		arginine ABC transporter substrate-binding protein
KKF83912.1	sugar ABC transporter substrate-binding protein		K23508	298.7	412.6	4.1e-124	galactofuranose transport system substrate-binding protein	XF37_10785	2.25281	6.13877e-05		sugar ABC transporter substrate-binding protein
KKF83914.1	ABC transporter permease		K23509	332.03	372.9	4.6e-112	galactofuranose transport system permease protein	XF37_10800	2.23957	0.000813398		ABC transporter permease
KKF82153.1	adenosylmethionine-8-amino-7-oxononanoate aminotransferase		K00833	434.53	683.5	5.6e-206	adenosylmethionine---8-amino-7-oxononanoate aminotransferase [EC:2.6.1.	XF37_20090	2.23769	0.00187032		adenosylmethionine-8-amino-7-oxononanoate aminotransferase
KKF82976.1	phospho-2-dehydro-3-deoxyheptonate aldolase		K01626	35.8	264.2	9.8e-79	3-deoxy-7-phosphoheptulonate synthase [EC:2.5.1.54]	XF37_14500	2.23639	5.00753e-05		phospho-2-dehydro-3-deoxyheptonate aldolase
KKF85608.1	dihydroxy-acid dehydratase		K01687	637.93	888.5	1.1e-267	dihydroxy-acid dehydratase [EC:4.2.1.9]	XF37_01350	2.23184	0.00231112		dihydroxy-acid dehydratase
KKF82115.1	glutamine ABC transporter permease	glnP	K10037	574.5	287.9	4.4e-86	glutamine transport system permease protein	XF37_19895	2.23056	0.00346149	glnP	glutamine ABC transporter permease
KKF80536.1	carbamoyl phosphate synthase small subunit		K01956	509.4	651.6	3.9e-196	carbamoyl-phosphate synthase small subunit [EC:6.3.5.5]	XF37_27495	2.23008	0.00199381		carbamoyl phosphate synthase small subunit
KKF84571.1	L-arabinose transporter permease	araH	K10538	342.73	554.4	2e-167	L-arabinose transport system permease protein	XF37_06610	2.22979	0.00036787	araH	L-arabinose transporter permease
KKF83696.1	tartronate semialdehyde reductase	garR	K00042	393.3	416.1	3.2e-125	2-hydroxy-3-oxopropionate reductase [EC:1.1.1.60]	XF37_11790	2.22832	0.000463558	garR	tartronate semialdehyde reductase
KKF84248.1	glycine/betaine ABC transporter ATP-binding protein		K02000	402.97	646.6	2.2e-194	glycine betaine/proline transport system ATP-binding protein [EC:7.6.2.	XF37_09570	2.22251	0.0221075		glycine/betaine ABC transporter ATP-binding protein
KKF84391.1	aminopeptidase		K20608	367.9	280.3	5.2e-84	tetrahedral aminopeptidase [EC:3.4.11.-]	XF37_07225	2.20829	0.0233079		aminopeptidase
KKF80992.1	ribose-phosphate pyrophosphokinase		K05774	105.33	256.4	1.2e-76	ribose 1,5-bisphosphokinase [EC:2.7.4.23]	XF37_24890	2.19582	0.000576097		ribose-phosphate pyrophosphokinase
KKF82114.1	glutamine ABC transporter substrate-bindnig protein	glnH	K10036	271.87	339.1	8.8e-102	glutamine transport system substrate-binding protein	XF37_19890	2.18852	0.00635251	glnH	glutamine ABC transporter substrate-bindnig protein
KKF81769.1	tail protein		K06905	83.57	99.8	5.4e-29	uncharacterized protein	XF37_21100	2.18608	0.00893222		tail protein
KKF85014.1	colicin V production protein		K03558	47	168.5	5.2e-50	membrane protein required for colicin V production	XF37_03970	2.1859	0.000794099		colicin V production protein
KKF82876.1	multidrug transporter		K11742	94.13	163.2	7e-49	spermidine export protein MdtI	XF37_13950	2.1739	0.000875887		multidrug transporter
KKF84464.1	cold-shock protein		K03704	85.93	56	1.8e-15	cold shock protein	XF37_06765	2.16969	0.00415051		cold-shock protein
KKF81927.1	aspartate kinase	metL	K12525	764.13	1337.5	0	bifunctional aspartokinase / homoserine dehydrogenase 2 [EC:2.7.2.4 1.1	XF37_20360	2.16578	0.00276415	metL	aspartate kinase
KKF82754.1	nitrate reductase	narI	K00374	64.83	368.4	1.7e-110	nitrate reductase gamma subunit [EC:1.7.5.1 1.7.99.-]	XF37_16085	2.15662	0.000973354	narI	nitrate reductase
KKF83830.1	phosphoribosylaminoimidazole-succinocarboxamide synthase		K01923	165.7	194.2	1.2e-57	phosphoribosylaminoimidazole-succinocarboxamide synthase [EC:6.3.2.6]	XF37_10335	2.15369	0.00167195		phosphoribosylaminoimidazole-succinocarboxamide synthase
KKF82753.1	nitrate reductase		K00374	64.83	457.9	1.2e-137	nitrate reductase gamma subunit [EC:1.7.5.1 1.7.99.-]	XF37_16080	2.13845	0.00170323		nitrate reductase
KKF80961.1	permase		K06901	104.47	413.2	4.9e-124	adenine/guanine/hypoxanthine permease	XF37_24725	2.13205	0.00212359		permase
KKF83399.1	D-xylose transporter subunit XylF	xylF	K10543	341.03	507.2	1.2e-152	D-xylose transport system substrate-binding protein	XF37_12625	2.12576	0.00211975	xylF	D-xylose transporter subunit XylF
KKF84794.1	malate synthase		K01638	119.97	841.5	2e-253	malate synthase [EC:2.3.3.9]	XF37_05565	2.12341	0.00648213		malate synthase
KKF83727.1	L-aspartate oxidase		K00278	552.93	794.2	4.2e-239	L-aspartate oxidase [EC:1.4.3.16]	XF37_09800	2.1107	0.00179501		L-aspartate oxidase
KKF83143.1	hydrolase		K23359	213.5	146.3	4.3e-43	biuret amidohydrolase [EC:3.5.1.84]	XF37_15380	2.09639	0.00208017		hydrolase
KKF85017.1	histidine ABC transporter substrate-binding protein HisJ		K10014	409.5	400.6	8.1e-121	histidine transport system substrate-binding protein	XF37_03985	2.08679	0.000774074		histidine ABC transporter substrate-binding protein HisJ
KKF85607.1	threonine dehydratase		K01754	254.23	540.1	2.9e-162	threonine dehydratase [EC:4.3.1.19]	XF37_01345	2.0715	0.00155466		threonine dehydratase
KKF82730.1	peptide ABC transporter substrate-binding protein		K02035	238.7	365.4	1.8e-109	peptide/nickel transport system substrate-binding protein	XF37_15965	2.06812	0.000977653		peptide ABC transporter substrate-binding protein
KKF80540.1	carnitine operon protein CaiE		K08279	332.6	389.1	9.8e-118	carnitine operon protein CaiE	XF37_27515	2.06517	0.0255256		carnitine operon protein CaiE
KKF85019.1	amino acid ABC transporter permease		K10016	328.47	387.4	5.5e-117	histidine transport system permease protein	XF37_03995	2.04935	0.000896385		amino acid ABC transporter permease
KKF84793.1	isocitrate lyase		K01637	199.87	730.6	7e-220	isocitrate lyase [EC:4.1.3.1]	XF37_05560	2.04021	0.00090061		isocitrate lyase
KKF83982.1	D-galactose transporter GalP		K08137	498.93	721	1.6e-217	MFS transporter, SP family, galactose:H+ symporter	XF37_08070	2.03252	0.00120482		D-galactose transporter GalP
KKF84173.1	6-carboxy-5,6,7,8-tetrahydropterin synthase		K01737	27.8	154.3	1.1e-45	6-pyruvoyltetrahydropterin/6-carboxytetrahydropterin synthase [EC:4.2.3	XF37_09125	2.02482	0.00374893		6-carboxy-5,6,7,8-tetrahydropterin synthase
KKF83398.1	xylose transporter		K10441	708.03	702.9	2.2e-211	ribose transport system ATP-binding protein [EC:7.5.2.7]	XF37_12620	2.00919	0.000353161		xylose transporter
KKF81932.1	transposase		K07489	134.93	63	1.1e-17	transposase	XF37_20385	1.97638	0.00471688		transposase
KKF84151.1	23S rRNA methyltransferase	rumA	K03215	280.03	467.2	2.7e-140	23S rRNA (uracil1939-C5)-methyltransferase [EC:2.1.1.190]	XF37_09005	1.97355	0.00588498	rumA	23S rRNA methyltransferase
KKF82752.1	nitrate reductase	narH	K00371	267.77	969	4.4e-292	nitrate reductase / nitrite oxidoreductase, beta subunit [EC:1.7.5.1 1.	XF37_16075	1.97139	0.00286404	narH	nitrate reductase
KKF82075.1	glutaredoxin		K03674	88.8	146.7	5.7e-44	glutaredoxin 1	XF37_19680	1.97129	0.00049903		glutaredoxin
KKF84148.1	glucarate transporter		K03535	518.13	684.1	1.8e-206	MFS transporter, ACS family, glucarate transporter	XF37_08985	1.94977	0.0210749		glucarate transporter
KKF84412.1	glycosyl hydrolase family 32		K01193	412.03	497.7	1.9e-149	beta-fructofuranosidase [EC:3.2.1.26]	XF37_07340	1.94743	0.00370235		glycosyl hydrolase family 32
KKF82116.1	glutamine ABC transporter ATP-binding protein	glnQ	K02028	378.37	438.2	1.7e-131	polar amino acid transport system ATP-binding protein [EC:7.4.2.1]	XF37_19900	1.94165	0.0107542	glnQ	glutamine ABC transporter ATP-binding protein
KKF80577.1	2-isopropylmalate synthase		K01649	465.87	585.4	4.3e-176	2-isopropylmalate synthase [EC:2.3.3.13]	XF37_27720	1.9367	0.0474449		2-isopropylmalate synthase
KKF81293.1	2Fe-2S ferredoxin		K11107	88.27	129.2	4.3e-38	ferredoxin	XF37_23040	1.93388	0.00115295		2Fe-2S ferredoxin
KKF82272.1	amino acid dehydrogenase		K18929	457.8	689.5	1.2e-207	L-lactate dehydrogenase complex protein LldF	XF37_18145	1.92227	0.00529043		amino acid dehydrogenase
KKF83726.1	tRNA (adenine-N6)-methyltransferase		K15460	106.57	294.6	2.4e-88	tRNA1Val (adenine37-N6)-methyltransferase [EC:2.1.1.223]	XF37_09795	1.91782	0.0218876		tRNA (adenine-N6)-methyltransferase
KKF83424.1	membrane protein		K06077	38.37	21	9.2e-05	outer membrane lipoprotein SlyB	XF37_11080	1.91579	0.0344387		membrane protein
KKF82829.1	flagellar biosynthesis protein FliR	fliR	K02421	170.17	281.7	1.9e-84	flagellar biosynthesis protein FliR	XF37_15635	1.89187	0.00627486	fliR	flagellar biosynthesis protein FliR
KKF80695.1	hypothetical protein		K21471	149.83	46.1	1.8e-12	peptidoglycan DL-endopeptidase CwlO [EC:3.4.-.-]	XF37_28315	1.88475	0.00666474		hypothetical protein
KKF80365.1	phosphoribosylaminoimidazolecarboxamide formyltransferase	purH	K00602	143.8	821.4	1.2e-247	phosphoribosylaminoimidazolecarboxamide formyltransferase / IMP cyclohy	XF37_28570	1.87711	0.0323523	purH	phosphoribosylaminoimidazolecarboxamide formyltransferase
KKF84792.1	isocitrate dehydrogenase	aceK	K00906	372.2	868.6	5.9e-262	isocitrate dehydrogenase kinase/phosphatase [EC:2.7.11.5 3.1.3.-]	XF37_05555	1.87455	0.046032	aceK	isocitrate dehydrogenase
KKF85178.1	hypothetical protein		K00567	177.07	198.8	4.8e-59	methylated-DNA-[protein]-cysteine S-methyltransferase [EC:2.1.1.63]	XF37_03145	1.87229	0.0047697		hypothetical protein
KKF80841.1	ribosome-associated protein		K14761	50.17	99.3	6.7e-29	ribosome-associated protein	XF37_26070	1.86652	0.0227088		ribosome-associated protein
KKF82390.1	CDP-diacylglycerol pyrophosphatase		K01521	49.5	375.9	4.5e-113	CDP-diacylglycerol pyrophosphatase [EC:3.6.1.26]	XF37_17595	1.86339	0.00369052		CDP-diacylglycerol pyrophosphatase
KKF85018.1	histidine ABC transporter substrate-binding protein HisJ		K10014	409.5	428.7	2.2e-129	histidine transport system substrate-binding protein	XF37_03990	1.86334	7.43314e-05		histidine ABC transporter substrate-binding protein HisJ
KKF84933.1	LexA regulated protein		K07722	56.47	22.5	2.6e-05	CopG family transcriptional regulator, nickel-responsive regulator	XF37_04590	1.85337	0.00955448		LexA regulated protein
KKF83060.1	diguanylate cylase		K21085	258.57	161.5	1.3e-47	diguanylate cyclase [EC:2.7.7.65]	XF37_14935	1.84369	0.0195228		diguanylate cylase
KKF83126.1	phosphoribosylglycinamide formyltransferase		K08289	256.67	761.6	3.3e-229	phosphoribosylglycinamide formyltransferase 2 [EC:2.1.2.2]	XF37_15285	1.83972	0.0292775		phosphoribosylglycinamide formyltransferase
KKF85605.1	ketol-acid reductoisomerase		K00053	81.03	464.5	1.6e-139	ketol-acid reductoisomerase [EC:1.1.1.86]	XF37_01335	1.83298	0.00820864		ketol-acid reductoisomerase
KKF80580.1	acetolactate synthase 3 catalytic subunit		K01652	457.7	772.3	1.5e-232	acetolactate synthase I/II/III large subunit [EC:2.2.1.6]	XF37_27735	1.82618	0.0198629		acetolactate synthase 3 catalytic subunit
KKF83921.1	ribonucleoside-triphosphate reductase		K21636	134	572.4	4.2e-172	ribonucleoside-triphosphate reductase (formate) [EC:1.1.98.6]	XF37_10835	1.81918	0.0351968		ribonucleoside-triphosphate reductase
KKF82470.1	capsid assembly protein		K21511	239.6	503.7	2e-151	capsid assembly protease [EC:3.4.21.-]	XF37_17460	1.79914	0.0384492		capsid assembly protein
KKF85071.1	heptose kinase		K08296	74.2	26	1.2e-06	phosphohistidine phosphatase [EC:3.1.3.-]	XF37_04265	1.79724	0.0188409		heptose kinase
KKF82312.1	beta-D-galactosidase	lacZ	K12111	1258.47	909.5	6.9e-274	evolved beta-galactosidase subunit alpha [EC:3.2.1.23]	XF37_18390	1.79446	0.0139284	lacZ	beta-D-galactosidase
KKF83743.1	transcriptional regulator		K15835	272.73	265.3	1.6e-79	RpiR family transcriptional regulator, murPQ operon repressor	XF37_09880	1.77885	0.0128086		transcriptional regulator
KKF82064.1	23S rRNA methyltransferase	rumB	K03212	316.6	596.1	8e-180	23S rRNA (uracil747-C5)-methyltransferase [EC:2.1.1.189]	XF37_19625	1.77247	0.00705714	rumB	23S rRNA methyltransferase
KKF83746.1	phosphoribosylformylglycinamidine synthase		K01952	648.33	2152.5	0	phosphoribosylformylglycinamidine synthase [EC:6.3.5.3]	XF37_09900	1.77131	0.00497396		phosphoribosylformylglycinamidine synthase
KKF84853.1	hypothetical protein		K07126	60.17	137.4	2.3e-40	uncharacterized protein	XF37_04770	1.7695	0.0324771		hypothetical protein
KKF85313.1	peptide transporter		K12369	481.73	573.8	3.1e-173	dipeptide transport system permease protein	XF37_02665	1.7661	0.00405647		peptide transporter
KKF84465.1	cold-shock protein		K03704	85.93	126.9	3.3e-37	cold shock protein	XF37_06770	1.74734	0.0255564		cold-shock protein
KKF82088.1	ribosomal protein S12 methylthiotransferase	rimO	K14441	442.8	722.3	1.8e-217	ribosomal protein S12 methylthiotransferase [EC:2.8.4.4]	XF37_19750	1.74521	0.0122312	rimO	ribosomal protein S12 methylthiotransferase
KKF82750.1	nitrate/nitrite transporter NarK		K02575	163.53	423	5e-127	MFS transporter, NNP family, nitrate/nitrite transporter	XF37_16065	1.74388	0.00296839		nitrate/nitrite transporter NarK
KKF81930.1	hypothetical protein		K13694	180.83	20.7	6.5e-05	murein DD-endopeptidase / murein LD-carboxypeptidase [EC:3.4.-.- 3.4.17	XF37_20375	1.74359	0.00465838		hypothetical protein
KKF81167.1	ATP-binding protein		K07483	42.1	59.7	1e-16	transposase	XF37_23920	1.7299	0.0419813		ATP-binding protein
KKF82273.1	hypothetical protein		K00782	129.63	181.4	8.2e-54	L-lactate dehydrogenase complex protein LldG	XF37_18150	1.71648	0.0196164		hypothetical protein
KKF81872.1	toxin		K18837	46.63	224.9	8.2e-68	cytoskeleton-binding toxin CbtA and related proteins	XF37_21010	1.71315	0.00499073		toxin
KKF80700.1	DL-methionine transporter permease subunit		K02072	147.9	342.8	8e-103	D-methionine transport system permease protein	XF37_28340	1.68662	0.0134217		DL-methionine transporter permease subunit
KKF82315.1	3-(3-hydroxyphenyl)propionate hydroxylase	mhpA	K05712	364.33	568.7	4.2e-171	3-(3-hydroxy-phenyl)propionate hydroxylase [EC:1.14.13.127]	XF37_18415	1.6862	0.00867168	mhpA	3-(3-hydroxyphenyl)propionate hydroxylase
KKF84245.1	transporter		K08224	190.17	181.9	4.5e-54	MFS transporter, YNFM family, putative membrane transport protein	XF37_09555	1.67852	0.0181055		transporter
KKF83920.1	ribonucleoside-triphosphate reductase		K04068	114.8	221.7	3.7e-66	anaerobic ribonucleoside-triphosphate reductase activating protein [EC:	XF37_10830	1.66793	0.00812072		ribonucleoside-triphosphate reductase
KKF84166.1	FAD-linked oxidoreductase		K00803	340.13	385.2	2e-115	alkyldihydroxyacetonephosphate synthase [EC:2.5.1.26]	XF37_09085	1.66432	0.0157491		FAD-linked oxidoreductase
KKF82731.1	peptide ABC transporter permease		K12369	481.73	422.1	4.5e-127	dipeptide transport system permease protein	XF37_15970	1.65815	0.0139284		peptide ABC transporter permease
KKF83665.1	cystathionine beta-lyase		K01760	478.87	499.1	3.4e-150	cysteine-S-conjugate beta-lyase [EC:4.4.1.13]	XF37_12370	1.6548	0.0136844		cystathionine beta-lyase
KKF84136.1	L-fucose transporter		K02429	155.63	490.3	1.3e-147	MFS transporter, FHS family, L-fucose permease	XF37_08920	1.6486	0.020902		L-fucose transporter
KKF82733.1	peptide ABC transporter substrate-binding protein		K02031	427.07	488.3	1.7e-146	peptide/nickel transport system ATP-binding protein	XF37_15980	1.64459	0.00965834		peptide ABC transporter substrate-binding protein
KKF84223.1	transcriptional regulator		K12266	501.77	736.9	4.7e-222	anaerobic nitric oxide reductase transcription regulator	XF37_09405	1.62227	0.00523291		transcriptional regulator
KKF84928.1	copper transporter		K07796	501.63	813.2	1.7e-245	outer membrane protein, copper/silver efflux system	XF37_05170	1.62183	0.0138322		copper transporter
KKF83608.1	30S ribosomal protein S21	rpsU	K02970	28.8	89.9	5e-26	small subunit ribosomal protein S21	XF37_12075	1.61936	0.00789615	rpsU	30S ribosomal protein S21
KKF82751.1	nitrate reductase	narZ	K00370	777.47	2206.6	0	nitrate reductase / nitrite oxidoreductase, alpha subunit [EC:1.7.5.1 1	XF37_16070	1.61646	0.03219	narZ	nitrate reductase
KKF83250.1	UDP-galactose-4-epimerase		K01784	271.2	449.4	6.2e-135	UDP-glucose 4-epimerase [EC:5.1.3.2]	XF37_13495	1.60481	0.00278216		UDP-galactose-4-epimerase
KKF82373.1	primosome assembly protein PriA		K04066	131.2	892.1	1.6e-268	primosomal protein N' (replication factor Y) (superfamily II helicase)	XF37_17500	1.60213	0.0348035		primosome assembly protein PriA
KKF82317.1	2-hydroxy-6-oxo-6-phenylhexa-2,4-dienoate hydrolase		K10222	580.67	358.4	5.7e-108	2,6-dioxo-6-phenylhexa-3-enoate hydrolase [EC:3.7.1.8]	XF37_18425	1.59766	0.0494734		2-hydroxy-6-oxo-6-phenylhexa-2,4-dienoate hydrolase
KKF81652.1	aspartate-semialdehyde dehydrogenase		K00133	189.43	345.6	1.4e-103	aspartate-semialdehyde dehydrogenase [EC:1.2.1.11]	XF37_21840	1.59694	0.0292775		aspartate-semialdehyde dehydrogenase
KKF82734.1	peptide ABC transporter ATP-binding protein		K02032	379.77	401.7	2e-120	peptide/nickel transport system ATP-binding protein	XF37_15985	1.59404	0.0246811		peptide ABC transporter ATP-binding protein
KKF83742.1	ferredoxin		K14120	98.57	35.1	1.9e-09	energy-converting hydrogenase B subunit K	XF37_09875	1.58833	0.0144857		ferredoxin
KKF84152.1	(p)ppGpp synthetase	relA	K01139	804.7	775.1	2.4e-233	GTP diphosphokinase / guanosine-3',5'-bis(diphosphate) 3'-diphosphatase	XF37_09010	1.58822	0.0178117	relA	(p)ppGpp synthetase
KKF81910.1	acetylornithine deacetylase		K01438	303.5	416.1	8.4e-125	acetylornithine deacetylase [EC:3.5.1.16]	XF37_20270	1.58719	0.0292775		acetylornithine deacetylase
KKF82253.1	alkaline phosphatase		K04342	779.93	506.5	2e-152	streptomycin-6-phosphatase [EC:3.1.3.39]	XF37_19005	1.57942	0.022328		alkaline phosphatase
KKF84199.1	phenolic acid decarboxylase		K01612	481.47	878.1	3.6e-265	vanillate/4-hydroxybenzoate decarboxylase subunit C [EC:4.1.1.- 4.1.1.6	XF37_09265	1.55947	0.0469344		phenolic acid decarboxylase
KKF80364.1	phosphoribosylamine--glycine ligase		K01945	183.47	734.2	3.3e-221	phosphoribosylamine---glycine ligase [EC:6.3.4.13]	XF37_28565	1.55729	0.0233079		phosphoribosylamine--glycine ligase
KKF80819.1	transcriptional regulator		K10972	366.1	493	8e-149	LysR family transcriptional regulator, transcriptional activator of the	XF37_25955	1.55659	0.00703518		transcriptional regulator
KKF85602.1	ATP-dependent DNA helicase Rep		K03656	803.9	1092.7	0	ATP-dependent DNA helicase Rep [EC:3.6.4.12]	XF37_01320	1.53706	0.0154468		ATP-dependent DNA helicase Rep
KKF83591.1	hypothetical protein		K11391	312.83	657.9	3.4e-198	23S rRNA (guanine1835-N2)-methyltransferase [EC:2.1.1.174]	XF37_11975	1.52779	0.0183605		hypothetical protein
KKF81715.1	transporter		K06141	186.47	577.7	2.8e-174	MFS transporter, TsgA protein	XF37_22165	1.52767	0.0311605		transporter
KKF84123.1	N-acetylmuramoyl-L-alanine amidase	amiC	K01448	32.53	248.1	6e-74	N-acetylmuramoyl-L-alanine amidase [EC:3.5.1.28]	XF37_08840	1.52191	0.0367725	amiC	N-acetylmuramoyl-L-alanine amidase
KKF85021.1	amino acid transporter		K10017	468.3	498.9	6.3e-151	histidine transport system ATP-binding protein [EC:7.4.2.1]	XF37_04005	1.5188	0.0324771		amino acid transporter
KKF80725.1	hypothetical protein		K18920	81.53	58.4	1.1e-16	protein HokA	XF37_26585	1.5177	0.0371614		hypothetical protein
KKF83074.1	tartrate dehydrogenase		K07246	459	622.7	5.8e-188	tartrate dehydrogenase/decarboxylase / D-malate dehydrogenase [EC:1.1.1	XF37_15010	1.50882	0.02201		tartrate dehydrogenase
KKF80754.1	endopeptidase		K14744	30.3	190.8	9.1e-57	prophage endopeptidase [EC:3.4.-.-]	XF37_26420	1.48774	0.0293514		endopeptidase
KKF85554.1	membrane protein		K03298	161.57	66.1	8.6e-19	drug/metabolite transporter, DME family	XF37_01050	1.48654	0.0117829		membrane protein
KKF85219.1	gamma-glutamylputrescine synthetase		K09470	581.6	773.2	1.8e-233	gamma-glutamylputrescine synthase [EC:6.3.1.11]	XF37_03360	1.48284	0.0151458		gamma-glutamylputrescine synthetase
KKF84517.1	ABC transporter permease		K09808	207.63	170.5	1.7e-50	lipoprotein-releasing system permease protein	XF37_07070	1.47588	0.042392		ABC transporter permease
KKF84189.1	hypothetical protein		K07680	212.67	19.6	7e-05	two-component system, NarL family, sensor histidine kinase ComP [EC:2.7	XF37_09210	1.47296	0.00627486		hypothetical protein
KKF80546.1	electron transfer flavoprotein		K03521	54	197.4	1.3e-58	electron transfer flavoprotein beta subunit	XF37_27545	1.47105	0.0476007		electron transfer flavoprotein
KKF85174.1	transcriptional regulator		K14057	253.67	380.2	2.3e-114	LysR family transcriptional regulator, regulator of abg operon	XF37_03120	1.46104	0.0286062		transcriptional regulator
KKF82168.1	hypothetical protein		K08640	57.2	52.3	2.2e-14	zinc D-Ala-D-Ala carboxypeptidase [EC:3.4.17.14]	XF37_19265	1.45846	0.0157535		hypothetical protein
KKF84097.1	arabinose:proton symporter		K08137	498.93	624	4.1e-188	MFS transporter, SP family, galactose:H+ symporter	XF37_08710	1.45621	0.0155068		arabinose:proton symporter
KKF82293.1	sugar ABC transporter permease		K02057	289.13	289.2	1.3e-86	simple sugar transport system permease protein	XF37_18290	1.44978	0.032134		sugar ABC transporter permease
KKF81387.1	5-carboxymethyl-2-hydroxymuconate isomerase		K16165	295.37	392.9	4e-118	fumarylpyruvate hydrolase [EC:3.7.1.20]	XF37_23535	1.44671	0.0385583		5-carboxymethyl-2-hydroxymuconate isomerase
KKF82130.1	ATP-dependent RNA helicase RhlE		K11927	542.5	716	8.9e-216	ATP-dependent RNA helicase RhlE [EC:3.6.4.13]	XF37_19970	1.44284	0.0196222		ATP-dependent RNA helicase RhlE
KKF84614.1	rhsA		K24473	2145.07	22.4	3.3e-06	teneurin	XF37_06265	1.4415	0.0138322		rhsA
KKF80839.1	cysteine--tRNA ligase	cysS	K01883	385.57	680.3	9e-205	cysteinyl-tRNA synthetase [EC:6.1.1.16]	XF37_26060	1.42492	0.0474449	cysS	cysteine--tRNA ligase
KKF82642.1	histidinol dehydrogenase	hisD	K00013	504.9	679.3	1.9e-204	histidinol dehydrogenase [EC:1.1.1.23]	XF37_17290	1.41619	0.0300778	hisD	histidinol dehydrogenase
KKF84027.1	hemolysin		K11068	169.5	301.7	1.7e-90	hemolysin III	XF37_08310	1.40092	0.0406933		hemolysin
KKF85316.1	phosphoethanolamine transferase		K12975	507.4	954.4	4.8e-288	KDO II ethanolaminephosphotransferase [EC:2.7.8.42]	XF37_02690	1.38389	0.0385583		phosphoethanolamine transferase
KKF80699.1	DL-methionine transporter substrate-binding subunit	metQ	K02073	102.2	385.1	1e-115	D-methionine transport system substrate-binding protein	XF37_28335	1.38047	0.034572	metQ	DL-methionine transporter substrate-binding subunit
KKF81376.1	beta-methylgalactoside transporter permease	mglC	K10541	351.13	520.8	5.8e-157	methyl-galactoside transport system permease protein	XF37_23480	1.37934	0.0391047	mglC	beta-methylgalactoside transporter permease
KKF83525.1	hypothetical protein		K09979	73.97	196.7	4.8e-59	uncharacterized protein	XF37_11630	1.37576	0.022328		hypothetical protein
KKF82211.1	exodeoxyribonuclease VII small subunit		K03602	22.2	106.6	4.4e-31	exodeoxyribonuclease VII small subunit [EC:3.1.11.6]	XF37_18780	1.34271	0.0414185		exodeoxyribonuclease VII small subunit
KKF80949.1	DNA helicase		K02314	108.23	625.8	1.6e-188	replicative DNA helicase [EC:3.6.4.12]	XF37_24660	1.33711	0.0383586		DNA helicase
KKF84947.1	LysR family transcriptional regulator		K18900	323.23	221.7	4.2e-66	LysR family transcriptional regulator, regulator for bpeEF and oprC	XF37_04370	1.32676	0.0351593		LysR family transcriptional regulator
KKF84338.1	glutaminase		K01425	94.43	411.8	1.6e-123	glutaminase [EC:3.5.1.2]	XF37_07730	1.30529	0.0406933		glutaminase
KKF85704.1	acetolactate synthase catalytic subunit		K01652	457.7	751.2	3.5e-226	acetolactate synthase I/II/III large subunit [EC:2.2.1.6]	XF37_00330	1.29946	0.0218876		acetolactate synthase catalytic subunit
KKF84188.1	adenylylsulfate kinase		K00860	325.47	328.9	1.5e-98	adenylylsulfate kinase [EC:2.7.1.25]	XF37_09205	1.29711	0.026146		adenylylsulfate kinase
KKF82029.1	leucine-responsive transcriptional regulator		K03719	130.7	224.3	5.8e-67	Lrp/AsnC family transcriptional regulator, leucine-responsive regulator	XF37_19440	1.28943	0.0436331		leucine-responsive transcriptional regulator
KKF80576.1	3-isopropylmalate dehydrogenase		K00052	402.6	556	1.6e-167	3-isopropylmalate dehydrogenase [EC:1.1.1.85]	XF37_27715	1.28556	0.0333832		3-isopropylmalate dehydrogenase
KKF85558.1	threonine transporter		K05835	171.23	279.6	3.8e-84	threonine efflux protein	XF37_01070	1.28224	0.0279495		threonine transporter
KKF85557.1	homoserine transporter	rhtB	K05834	158.5	266.3	4.7e-80	homoserine/homoserine lactone efflux protein	XF37_01065	1.27727	0.0317707	rhtB	homoserine transporter
KKF85005.1	transporter		K08153	320.9	134.5	1.4e-39	MFS transporter, DHA1 family, multidrug resistance protein	XF37_03925	1.27386	0.0482913		transporter
KKF80327.1	lysozyme		K01185	24.3	105.5	1.3e-30	lysozyme [EC:3.2.1.17]	XF37_28660	1.27192	0.0409947		lysozyme
KKF84175.1	sulfite reductase subunit beta		K00381	579.57	842.4	1.3e-253	sulfite reductase (NADPH) hemoprotein beta-component [EC:1.8.1.2]	XF37_09135	1.26811	0.0218604		sulfite reductase subunit beta
KKF83331.1	lysozyme		K01185	24.3	23	1.5e-05	lysozyme [EC:3.2.1.17]	XF37_12965	1.2529	0.0438285		lysozyme
KKF85038.1	aminotransferase		K14260	322.03	758.8	8.3e-229	alanine-synthesizing transaminase [EC:2.6.1.66 2.6.1.2]	XF37_04090	1.22734	0.0344387		aminotransferase
KKF85777.1	FMN-binding protein MioC		K06205	124.53	219.4	6.4e-66	MioC protein	XF37_00720	1.224	0.0186263		FMN-binding protein MioC
KKF84042.1	guanine deaminase		K01487	305.03	534.3	1.4e-160	guanine deaminase [EC:3.5.4.3]	XF37_08395	1.22053	0.0469344		guanine deaminase
KKF84174.1	sulfite reductase subunit alpha	cysJ	K00380	515.87	720	1.4e-216	sulfite reductase (NADPH) flavoprotein alpha-component [EC:1.8.1.2]	XF37_09130	1.21484	0.0469344	cysJ	sulfite reductase subunit alpha
KKF82368.1	lysozyme		K01185	24.3	105.9	9.8e-31	lysozyme [EC:3.2.1.17]	XF37_17990	1.20357	0.0435801		lysozyme
KKF83697.1	hexuronate transporter		K08191	411.23	528.4	4e-159	MFS transporter, ACS family, hexuronate transporter	XF37_11930	1.19578	0.0337354		hexuronate transporter
KKF81924.1	peroxidase		K03782	417.33	1228.8	0	catalase-peroxidase [EC:1.11.1.21]	XF37_20345	1.19399	0.0469344		peroxidase
KKF82066.1	spermidine/putrescine ABC transporter permease		K11074	325.03	466.8	6e-141	putrescine transport system permease protein	XF37_19635	1.15452	0.0314535		spermidine/putrescine ABC transporter permease
KKF85295.1	hypothetical protein		K07263	264.8	129.5	6.4e-38	zinc protease [EC:3.4.24.-]	XF37_02570	1.07206	0.0494734		hypothetical protein
KKF83057.1	serine/threonine protein kinase		K07180	365.83	804.5	2e-242	serine protein kinase	XF37_14920	1.07103	0.0391658		serine/threonine protein kinase
KKF81553.1	membrane protein		K07285	50.2	205.3	1.9e-61	outer membrane lipoprotein	XF37_21320	-1.06941	0.0292297		membrane protein
KKF82205.1	protoheme IX farnesyltransferase		K02257	125.13	289.7	1.3e-86	heme o synthase [EC:2.5.1.141]	XF37_18750	-1.08962	0.0306966		protoheme IX farnesyltransferase
KKF85474.1	potassium transporter peripheral membrane component	trkA	K03499	133.03	190.3	1.7e-56	trk system potassium uptake protein	XF37_01610	-1.10623	0.0470743	trkA	potassium transporter peripheral membrane component
KKF84326.1	transcriptional regulator LsrR		K11531	306.53	461.3	4.5e-139	lsr operon transcriptional repressor	XF37_07665	-1.13544	0.0405575		transcriptional regulator LsrR
KKF80648.1	transcriptional regulator		K06206	83.27	319.3	5.4e-96	sugar fermentation stimulation protein A	XF37_28080	-1.16265	0.0406701		transcriptional regulator
KKF81968.1	membrane protein		K03286	114.4	152.9	4.5e-45	OmpA-OmpF porin, OOP family	XF37_19105	-1.1706	0.0182194		membrane protein
KKF83923.1	PTS system trehalose(maltose)-specific transporter subunits IIBC		K02819	618.5	726.4	6.7e-219	trehalose PTS system EIIBC or EIIBCA component [EC:2.7.1.201]	XF37_10845	-1.17206	0.0435801		PTS system trehalose(maltose)-specific transporter subunits IIBC
KKF84981.1	ABC transporter permease		K04754	104.13	269.7	1.1e-80	phospholipid-binding lipoprotein MlaA	XF37_03800	-1.18796	0.0287045		ABC transporter permease
KKF85603.1	hypothetical protein		K07171	19.27	32.3	2.6e-08	mRNA interferase MazF [EC:3.1.-.-]	XF37_01325	-1.20681	0.0356968		hypothetical protein
KKF83019.1	arginine succinyltransferase		K00673	207.13	552.2	2.4e-166	arginine N-succinyltransferase [EC:2.3.1.109]	XF37_14720	-1.2231	0.0270894		arginine succinyltransferase
KKF81536.1	transcriptional regulator		K21905	357.2	518.7	7e-157	AraC family transcriptional regulator, glutamate-dependent acid resista	XF37_21220	-1.23836	0.0195228		transcriptional regulator
KKF83835.1	succinyl-diaminopimelate desuccinylase		K01439	277.03	393.9	3.8e-118	succinyl-diaminopimelate desuccinylase [EC:3.5.1.18]	XF37_10360	-1.24985	0.0375106		succinyl-diaminopimelate desuccinylase
KKF82266.1	aldo/keto reductase		K06221	337.47	355.7	5.8e-107	2,5-diketo-D-gluconate reductase A [EC:1.1.1.346]	XF37_18115	-1.2502	0.0354696		aldo/keto reductase
KKF83017.1	succinylarginine dihydrolase		K01484	311.53	749.7	3e-226	succinylarginine dihydrolase [EC:3.5.3.23]	XF37_14710	-1.25749	0.0427667		succinylarginine dihydrolase
KKF85111.1	hypothetical protein		K18235	137.6	41.2	3e-11	virginiamycin B lyase [EC:4.2.99.-]	XF37_02780	-1.27944	0.0144189		hypothetical protein
KKF81313.1	ecotin		K08276	56.23	225.1	2.5e-67	ecotin	XF37_23155	-1.283	0.0496949		ecotin
KKF81852.1	secY/secA suppressor protein		K12147	153.5	233.7	1.5e-70	acidic protein MsyB	XF37_20885	-1.28332	0.020123		secY/secA suppressor protein
KKF82605.1	colanic acid biosynthesis protein	wcaD	K13620	440.9	790.2	1.2e-238	putative colanic acid polymerase	XF37_17100	-1.28452	0.0385583	wcaD	colanic acid biosynthesis protein
KKF85235.1	RNase II stability modulator		K14051	628.43	1026.3	0	c-di-GMP phosphodiesterase Gmr [EC:3.1.4.52]	XF37_03445	-1.28517	0.0338372		RNase II stability modulator
KKF81455.1	T3SS effector protein NleE		K23654	455.7	486.5	2.8e-147	T3SS secreted effector NleE	XF37_22695	-1.29215	0.0359118		T3SS effector protein NleE
KKF81947.1	Mn-containing catalase		K07217	211.07	375.5	6.2e-113	Mn-containing catalase	XF37_20165	-1.29467	0.0373532		Mn-containing catalase
KKF83327.1	peptidase C39		K11004	937.57	1106.7	0	ATP-binding cassette, subfamily B, bacterial HlyB/CyaB	XF37_13070	-1.30923	0.0497145		peptidase C39
KKF85768.1	ATP F0F1 synthase subunit gamma		K02115	245.73	373.4	3.8e-112	F-type H+-transporting ATPase subunit gamma	XF37_00675	-1.31906	0.0416899		ATP F0F1 synthase subunit gamma
KKF83902.1	hypothetical protein		K07109	87.43	324.5	8.6e-98	uncharacterized protein	XF37_10730	-1.32037	0.0164748		hypothetical protein
KKF84499.1	transcriptional regulator		K10921	110.63	94.6	2.4e-27	cholera toxin transcriptional activator	XF37_06970	-1.32963	0.0255861		transcriptional regulator
KKF81023.1	hypothetical protein		K06975	41.2	71.4	2.8e-20	uncharacterized protein	XF37_25065	-1.3365	0.0267066		hypothetical protein
KKF83855.1	ethanolamine utilization protein EutH		K04023	242.6	521.6	3.1e-157	ethanolamine transporter	XF37_10465	-1.33888	0.0411005		ethanolamine utilization protein EutH
KKF83945.1	hypothetical protein		K06915	119.17	401.8	1.5e-120	uncharacterized protein	XF37_10955	-1.3593	0.00574578		hypothetical protein
KKF84023.1	glycine cleavage system protein T	gcvT	K00605	312.7	474.2	1.7e-142	aminomethyltransferase [EC:2.1.2.10]	XF37_08285	-1.3635	0.0196164	gcvT	glycine cleavage system protein T
KKF82979.1	cyclic di-GMP regulator CdgR		K21086	116.23	110.5	2.3e-32	c-di-GMP phosphodiesterase [EC:3.1.4.52]	XF37_14515	-1.37567	0.0161719		cyclic di-GMP regulator CdgR
KKF84048.1	molybdenum cofactor cytidylyltransferase		K07141	103.07	151.5	1.3e-44	molybdenum cofactor cytidylyltransferase [EC:2.7.7.76]	XF37_08425	-1.37801	0.0194513		molybdenum cofactor cytidylyltransferase
KKF84985.1	3-ketoacyl-CoA thiolase	fadI	K07509	536.7	457.8	1.1e-137	acetyl-CoA acyltransferase [EC:2.3.1.16]	XF37_03820	-1.37996	0.0342338	fadI	3-ketoacyl-CoA thiolase
KKF81576.1	membrane protein		K13926	827.33	152.8	3e-45	ribosome-dependent ATPase	XF37_21440	-1.39104	0.0278404		membrane protein
KKF84141.1	serine/threonine protein kinase		K03837	529.97	689.9	3.2e-208	serine transporter	XF37_08945	-1.39173	0.028159		serine/threonine protein kinase
KKF82843.1	chaperone protein HchA		K05523	366.17	474.3	3e-143	D-lactate dehydratase / protein deglycase [EC:4.2.1.130 3.5.1.124]	XF37_15715	-1.39625	0.0161719		chaperone protein HchA
KKF84327.1	sugar ABC transporter		K10558	581.27	807.5	1.1e-243	AI-2 transport system ATP-binding protein	XF37_07670	-1.40045	0.0306966		sugar ABC transporter
KKF82618.1	colanic acid biosynthesis protein	wcaM	K16711	772.73	886.9	7.2e-268	colanic acid biosynthesis protein WcaM	XF37_17165	-1.41377	0.0406933	wcaM	colanic acid biosynthesis protein
KKF81328.1	heme lyase subunit CcmH		K04017	172.5	140.7	6.9e-42	formate-dependent nitrite reductase complex subunit NrfF	XF37_23235	-1.41955	0.0494734		heme lyase subunit CcmH
KKF81053.1	fumarate reductase		K00239	682.73	674.4	5.2e-203	succinate dehydrogenase / fumarate reductase, flavoprotein subunit [EC:	XF37_25225	-1.4272	0.0184972		fumarate reductase
KKF82021.1	hypothetical protein		K23359	213.5	50.7	4.3e-14	biuret amidohydrolase [EC:3.5.1.84]	XF37_19400	-1.42945	0.0469344		hypothetical protein
KKF84626.1	protease		K17286	382.23	164.8	9.5e-49	erythrocyte band 7 integral membrane protein	XF37_06035	-1.4295	0.0310118		protease
KKF82298.1	hypothetical protein		K12151	91.6	46.5	1.4e-12	multiple stress resistance protein BhsA	XF37_18320	-1.44974	0.00648213		hypothetical protein
KKF83481.1	RNA polymerase factor sigma-54		K03092	53.63	615.9	1.8e-185	RNA polymerase sigma-54 factor	XF37_11385	-1.45321	0.0226661		RNA polymerase factor sigma-54
KKF84804.1	hypothetical protein		K14479	236.3	37.9	3.9e-10	procyclin	XF37_05275	-1.45482	0.028159		hypothetical protein
KKF85382.1	lipopolysaccharide biosynthesis protein		K02850	130.23	269.1	9.7e-81	heptose II phosphotransferase [EC:2.7.1.-]	XF37_02195	-1.47471	0.012462		lipopolysaccharide biosynthesis protein
KKF82123.1	hypothetical protein		K06204	33.7	35.7	3.2e-09	DnaK suppressor protein	XF37_19935	-1.4779	0.02413		hypothetical protein
KKF81453.1	cytotoxin		K22721	119.9	20.6	5.2e-05	inositol phosphorylceramide mannosyltransferase catalytic subunit [EC:2	XF37_22685	-1.48012	0.0337544		cytotoxin
KKF85167.1	universal stress protein F		K14061	139.5	185.8	1.6e-55	universal stress protein F	XF37_03080	-1.48274	0.00703518		universal stress protein F
KKF83937.1	RNase E inhibitor protein		K09893	40.47	235.4	1.2e-70	regulator of ribonuclease activity B	XF37_10915	-1.48389	0.0112931		RNase E inhibitor protein
KKF82950.1	murein L,D-transpeptidase		K19236	411.47	381.4	1e-114	L,D-transpeptidase YcfS	XF37_14360	-1.49074	0.0494734		murein L,D-transpeptidase
KKF81865.1	curli assembly protein CsgF		K04338	58.33	157.3	8.3e-47	curli production assembly/transport component CsgF	XF37_20960	-1.49115	0.0293514		curli assembly protein CsgF
KKF84906.1	iron-enterobactin ABC transporter substrate-binding protein		K23185	406.97	518	2.4e-156	ferric enterobactin transport system substrate-binding protein	XF37_05050	-1.49448	0.00631318		iron-enterobactin ABC transporter substrate-binding protein
KKF82111.1	membrane protein	ompX	K11934	183.23	236.6	9.5e-71	outer membrane protein X	XF37_19870	-1.49856	0.0271492	ompX	membrane protein
KKF85379.1	ligase		K18814	139.67	101.9	1.3e-29	putative inorganic carbon (hco3(-)) transporter	XF37_02180	-1.5047	0.0299588		ligase
KKF84495.1	outer membrane N-deacetylase	pgaB	K11931	237.67	779.9	5.9e-235	poly-beta-1,6-N-acetyl-D-glucosamine N-deacetylase [EC:3.5.1.-]	XF37_06945	-1.54989	0.024123	pgaB	outer membrane N-deacetylase
KKF82615.1	colanic acid exporter		K16695	424.33	606.5	1.2e-182	lipopolysaccharide exporter	XF37_17150	-1.5595	0.00893891		colanic acid exporter
KKF82947.1	hypothetical protein		K01675	129.6	149.8	4.3e-45	fumarate hydratase D [EC:4.2.1.2]	XF37_14345	-1.56434	0.0384794		hypothetical protein
KKF85383.1	lipopolysaccharide 1,3-galactosyltransferase		K03275	287.13	349.7	6.8e-105	UDP-glucose:(glucosyl)LPS alpha-1,3-glucosyltransferase [EC:2.4.1.-]	XF37_02200	-1.56667	0.00751082		lipopolysaccharide 1,3-galactosyltransferase
KKF84812.1	hydrolase		K01259	137.63	43.1	7.1e-12	proline iminopeptidase [EC:3.4.11.5]	XF37_05195	-1.56757	0.0138322		hydrolase
KKF83781.1	3-mercaptopyruvate sulfurtransferase	sseA	K01011	194.87	323.7	5.8e-97	thiosulfate/3-mercaptopyruvate sulfurtransferase [EC:2.8.1.1 2.8.1.2]	XF37_10080	-1.56876	0.00338481	sseA	3-mercaptopyruvate sulfurtransferase
KKF82301.1	methylcitrate synthase		K01659	481.27	668.4	6.3e-202	2-methylcitrate synthase [EC:2.3.3.5]	XF37_18335	-1.56962	0.00550593		methylcitrate synthase
KKF82204.1	cytochrome o ubiquinol oxidase subunit IV		K02299	260.87	172.5	4e-51	cytochrome o ubiquinol oxidase subunit III	XF37_18745	-1.57004	0.00733101		cytochrome o ubiquinol oxidase subunit IV
KKF85471.1	peptide deformylase		K01462	46.33	226.2	1.4e-67	peptide deformylase [EC:3.5.1.88]	XF37_01595	-1.5704	0.0257607		peptide deformylase
KKF83214.1	2-oxoglutarate dehydrogenase		K00164	1085.5	1335.9	0	2-oxoglutarate dehydrogenase E1 component [EC:1.2.4.2]	XF37_13275	-1.59585	0.00338938		2-oxoglutarate dehydrogenase
KKF81864.1	curli assembly protein CsgE		K04337	85.93	183.6	3.6e-55	curli production assembly/transport component CsgE	XF37_20955	-1.59732	0.00893222		curli assembly protein CsgE
KKF84901.1	thioesterase		K24147	254.53	297.8	2.6e-90	proofreading thioesterase EntH	XF37_05025	-1.60709	0.0185274		thioesterase
KKF82113.1	DNA starvation/stationary phase protection protein Dps		K04047	69.73	154.6	1.2e-45	starvation-inducible DNA-binding protein	XF37_19880	-1.61365	0.00630972		DNA starvation/stationary phase protection protein Dps
KKF82625.1	perosamine synthetase		K13010	400.7	485.5	7.1e-146	perosamine synthetase [EC:2.6.1.102]	XF37_17200	-1.63526	0.0186263		perosamine synthetase
KKF84484.1	transcriptional regulator	putA	K13821	682.73	1640.8	0	RHH-type transcriptional regulator, proline utilization regulon repress	XF37_06885	-1.6358	0.0236222	putA	transcriptional regulator
KKF81962.1	hypothetical protein		K09909	72.17	239.3	1.5e-71	uncharacterized protein	XF37_19065	-1.64196	0.0104353		hypothetical protein
KKF80800.1	type III secretion protein GogB	gogB	K23942	1157.4	238.4	3.6e-71	Gifsy-1 prophage leucine-rich repeat protein	XF37_26370	-1.6425	0.00437786	gogB	type III secretion protein GogB
KKF81037.1	aspartate ammonia-lyase	aspA	K01744	651	875.2	1.1e-263	aspartate ammonia-lyase [EC:4.3.1.1]	XF37_25140	-1.65013	0.0259083	aspA	aspartate ammonia-lyase
KKF81551.1	hemin transporter		K07225	89.33	472.9	3.8e-142	putative hemin transport protein	XF37_21310	-1.66026	0.00598499		hemin transporter
KKF84053.1	diaminopropionate ammonia-lyase		K01751	260.73	520	2.2e-156	diaminopropionate ammonia-lyase [EC:4.3.1.15]	XF37_08455	-1.66393	0.0255775		diaminopropionate ammonia-lyase
KKF82851.1	secretion protein EspJ		K23648	362.9	443.6	2.8e-134	T3SS secreted effector ADP-ribosyltransferase EspJ	XF37_15760	-1.66784	0.0156404		secretion protein EspJ
KKF82621.1	glycosyl transferase		K16698	201.6	283.2	9.9e-85	teichuronic acid biosynthesis glycosyltransferase TuaG [EC:2.4.-.-]	XF37_17180	-1.67014	0.00207079		glycosyl transferase
KKF83016.1	succinylglutamate desuccinylase		K05526	104.77	452.7	2.4e-136	succinylglutamate desuccinylase [EC:3.5.1.96]	XF37_14705	-1.67129	0.00167195		succinylglutamate desuccinylase
KKF82624.1	flippase		K03328	239.73	42.1	1.4e-11	polysaccharide transporter, PST family	XF37_17195	-1.6745	0.00237041		flippase
KKF80865.1	ethanolamine utilization protein		K04029	82.27	49.1	1.5e-13	ethanolamine utilization protein EutP	XF37_25875	-1.67941	0.0371614		ethanolamine utilization protein
KKF84893.1	disulfide isomerase	dsbG	K03805	113.87	335.2	1.4e-100	thiol:disulfide interchange protein DsbG	XF37_04985	-1.69975	0.0122076	dsbG	disulfide isomerase
KKF84024.1	glycine cleavage system protein H		K02437	38.83	211.2	6.6e-63	glycine cleavage system H protein	XF37_08290	-1.70377	0.0259049		glycine cleavage system protein H
KKF81307.1	membrane protein		K09475	583.77	623.9	2.5e-188	outer membrane pore protein C	XF37_23125	-1.71825	0.000794099		membrane protein
KKF83453.1	membrane protein		K12151	91.6	74.4	2.7e-21	multiple stress resistance protein BhsA	XF37_11235	-1.72947	0.00549378		membrane protein
KKF82705.1	secretion protein EspO		K13793	101.7	162.6	5.3e-49	secreted effector OspE	XF37_16230	-1.73354	0.00521324		secretion protein EspO
KKF84764.1	maltose transporter membrane protein	malF	K10109	526.6	814.5	1e-245	maltose/maltodextrin transport system permease protein	XF37_05415	-1.73618	0.00237041	malF	maltose transporter membrane protein
KKF80959.1	transcriptional regulator		K13631	152.2	179.2	6.9e-54	AraC family transcriptional regulator, mar-sox-rob regulon activator	XF37_24715	-1.74109	0.00733101		transcriptional regulator
KKF84800.1	integrase		K04763	233.77	56.7	8.2e-16	integrase/recombinase XerD	XF37_05255	-1.75186	0.0226603		integrase
KKF83922.1	trehalose-6-phosphate hydrolase		K01226	794.93	901.7	5.9e-272	trehalose-6-phosphate hydrolase [EC:3.2.1.93]	XF37_10840	-1.75218	0.00746563		trehalose-6-phosphate hydrolase
KKF83926.1	endoribonuclease L-PSP		K09022	76.87	190.9	7.6e-57	2-iminobutanoate/2-iminopropanoate deaminase [EC:3.5.99.10]	XF37_10860	-1.75376	0.0104909		endoribonuclease L-PSP
KKF85508.1	peptidase A24		K02506	148.07	208.6	1.8e-62	leader peptidase HopD [EC:3.4.23.43]	XF37_01780	-1.75634	0.0411303		peptidase A24
KKF85583.1	D-alanine/D-serine/glycine permease		K03293	593.63	634.2	4.4e-191	amino acid transporter, AAT family	XF37_01225	-1.76868	0.00207043		D-alanine/D-serine/glycine permease
KKF81051.1	fumarate reductase		K00246	50.03	98.5	1.5e-28	fumarate reductase subunit C	XF37_25215	-1.77498	0.0047697		fumarate reductase
KKF82596.1	XRE family transcriptional regulator		K15773	57.03	36.2	1.3e-09	HTH-type transcriptional regulator / antitoxin HipB	XF37_17055	-1.77839	0.0113664		XRE family transcriptional regulator
KKF84983.1	long-chain fatty acid outer membrane transporter		K06076	73.3	398.1	1.7e-119	long-chain fatty acid transport protein	XF37_03810	-1.7879	0.00346149		long-chain fatty acid outer membrane transporter
KKF82302.1	2-methylcitrate dehydratase	prpD	K01720	232.4	772.1	1.6e-232	2-methylcitrate dehydratase [EC:4.2.1.79]	XF37_18340	-1.80246	0.0138264	prpD	2-methylcitrate dehydratase
KKF81802.1	ferric-rhodotorulic acid transporter		K16088	468.3	844.1	3.4e-254	outer-membrane receptor for ferric coprogen and ferric-rhodotorulic aci	XF37_20630	-1.81231	0.0259083		ferric-rhodotorulic acid transporter
KKF82623.1	glycosyl transferase		K13683	262.9	164	1.2e-48	putative colanic acid biosynthesis glycosyltransferase [EC:2.4.-.-]	XF37_17190	-1.81781	0.0012647		glycosyl transferase
KKF81052.1	fumarate reductase		K00245	281.87	391.6	7.6e-118	fumarate reductase iron-sulfur subunit [EC:1.3.5.4]	XF37_25220	-1.82077	0.00115295		fumarate reductase
KKF83313.1	hemolysin D		K11003	468.27	471.9	7.1e-142	hemolysin D	XF37_13075	-1.83303	0.00748585		hemolysin D
KKF81173.1	iron ABC transporter ATP-binding protein		K02013	259.73	275.2	2.6e-82	iron complex transport system ATP-binding protein [EC:7.2.2.-]	XF37_23955	-1.83987	0.0112451		iron ABC transporter ATP-binding protein
KKF81018.1	fumarate hydratase		K01676	388.07	981.2	2.1e-295	fumarate hydratase, class I [EC:4.2.1.2]	XF37_25035	-1.84221	0.0246663		fumarate hydratase
KKF81543.1	acid-resistance protein	hdeB	K19778	59.1	135.2	3.2e-40	acid stress chaperone HdeB	XF37_21260	-1.84319	0.00261049	hdeB	acid-resistance protein
KKF82626.1	glycosyl transferase		K12994	258.93	87.9	2.1e-25	mannosyl-N-acetyl-alpha-D-glucosaminyl-diphospho-ditrans,octacis-undeca	XF37_17205	-1.85342	0.0120813		glycosyl transferase
KKF84760.1	maltoporin	lamB	K02024	275.8	593.5	1.1e-178	maltoporin	XF37_05395	-1.85978	0.00208017	lamB	maltoporin
KKF84905.1	isochorismate synthase		K02361	345.33	452.6	4.9e-136	isochorismate synthase [EC:5.4.4.2]	XF37_05045	-1.86123	0.000431602		isochorismate synthase
KKF84253.1	alkylhydroperoxidase		K04756	119.27	39.4	1e-10	lipoyl-dependent peroxiredoxin subunit D [EC:1.11.1.28]	XF37_09595	-1.86177	0.0235569		alkylhydroperoxidase
KKF84422.1	DNA transfer protein p33		K16568	104.5	57.6	3.2e-16	exopolysaccharide production protein ExoZ	XF37_07395	-1.86733	0.00851644		DNA transfer protein p33
KKF81770.1	colanic acid biosynthesis acetyltransferase		K03819	161.9	123.9	1.4e-36	putative colanic acid biosynthesis acetyltransferase WcaB [EC:2.3.1.-]	XF37_21065	-1.90779	0.00609596		colanic acid biosynthesis acetyltransferase
KKF84075.1	type III secretion system needle complex protein PrgI		K03221	43.23	109.3	3e-32	type III secretion protein F	XF37_08595	-1.91181	0.0155605		type III secretion system needle complex protein PrgI
KKF81840.1	glutaredoxin		K03675	131.97	322.5	4e-97	glutaredoxin 2	XF37_20820	-1.91729	0.00158503		glutaredoxin
KKF84346.1	transcriptional regulator		K13632	173	217.5	1.1e-65	AraC family transcriptional regulator, mar-sox-rob regulon activator	XF37_07770	-1.92067	0.0120177		transcriptional regulator
KKF80379.1	hypothetical protein		K22111	733	69	1.3e-19	9-O-acetyl-N-acetylneuraminic acid deacetylase	XF37_28380	-1.92332	0.024123		hypothetical protein
KKF80371.1	hydrolase		K03760	374.63	723.7	5.9e-218	lipid A ethanolaminephosphotransferase [EC:2.7.8.43]	XF37_28410	-1.92795	0.000474729		hydrolase
KKF82203.1	cytochrome o ubiquinol oxidase subunit III		K02299	260.87	368.8	7.6e-111	cytochrome o ubiquinol oxidase subunit III	XF37_18740	-1.95945	0.00109007		cytochrome o ubiquinol oxidase subunit III
KKF82514.1	pilus assembly protein		K07350	240.7	23.1	1.6e-05	minor fimbrial subunit	XF37_16630	-1.97748	0.0118227		pilus assembly protein
KKF80448.1	restriction endonuclease EcoAI subunit S		K01154	44.87	117.5	2.4e-34	type I restriction enzyme, S subunit [EC:3.1.21.3]	XF37_27000	-1.97938	0.000776354		restriction endonuclease EcoAI subunit S
KKF80968.1	cytochrome C nitrite reductase		K04013	119.6	260.6	3.2e-78	cytochrome c-type protein NrfB	XF37_24760	-1.98159	0.00630972		cytochrome C nitrite reductase
KKF82215.1	pentapeptide repeats family protein		K21919	142.5	69.1	1.1e-19	BTB/POZ domain-containing protein KCTD9	XF37_18800	-1.99852	0.00910837		pentapeptide repeats family protein
KKF82930.1	superoxide dismutase		K04564	39.77	308	2.7e-92	superoxide dismutase, Fe-Mn family [EC:1.15.1.1]	XF37_14245	-1.99958	0.00211975		superoxide dismutase
KKF81027.1	lysine--tRNA ligase	lysS	K04567	323.2	806.6	1.4e-242	lysyl-tRNA synthetase, class II [EC:6.1.1.6]	XF37_25085	-2.00851	0.0471793	lysS	lysine--tRNA ligase
KKF84692.1	peptide chain release factor-like protein	prfH	K02839	186.97	260.2	3.2e-78	peptide chain release factor	XF37_05760	-2.03068	0.0281444	prfH	peptide chain release factor-like protein
KKF82087.1	biofilm formation regulatory protein BssR	bssR	K19688	146.7	208.1	8.9e-63	biofilm regulator BssR	XF37_19745	-2.0642	0.00155273	bssR	biofilm formation regulatory protein BssR
KKF84914.1	enterobactin esterase		K07214	249.83	647.5	5.5e-195	iron(III)-enterobactin esterase [EC:3.1.1.108]	XF37_05090	-2.07277	0.00456853		enterobactin esterase
KKF80970.1	nitrite reductase		K04015	273.67	331.3	2e-99	protein NrfD	XF37_24770	-2.09676	0.0219385		nitrite reductase
KKF84876.1	phospholipid:lipid A palmitoyltransferase	pagP	K12973	56.1	285	6.9e-86	lipid IVA palmitoyltransferase [EC:2.3.1.251]	XF37_04895	-2.14387	0.000262642	pagP	phospholipid:lipid A palmitoyltransferase
KKF84582.1	translation inhibitor protein RaiA		K05809	120.03	194.1	1.5e-58	ribosome-associated inhibitor A	XF37_06305	-2.15212	0.00199381		translation inhibitor protein RaiA
KKF81457.1	enterotoxin		K21440	461.83	20.4	2.1e-05	ankyrin repeat domain-containing protein 50	XF37_22705	-2.18781	0.000191274		enterotoxin
KKF84913.1	hypothetical protein		K07214	249.83	96	6.4e-28	iron(III)-enterobactin esterase [EC:3.1.1.108]	XF37_05085	-2.18955	0.0155068		hypothetical protein
KKF83953.1	carboxysome structural protein EutM		K04027	141.6	158.6	4.2e-47	ethanolamine utilization protein EutM	XF37_10440	-2.19426	0.00981667		carboxysome structural protein EutM
KKF85475.1	large-conductance mechanosensitive channel	mscL	K03282	40.8	198.5	3.4e-59	large conductance mechanosensitive channel	XF37_01615	-2.19698	0.00147893	mscL	large-conductance mechanosensitive channel
KKF84890.1	universal stress protein UspG		K11932	164.23	259.4	3.5e-78	universal stress protein G	XF37_04970	-2.19918	7.87801e-05		universal stress protein UspG
KKF85785.1	D-ribose transporter subunit RbsB		K10439	195.2	315.7	2e-94	ribose transport system substrate-binding protein	XF37_00765	-2.22312	0.00127419		D-ribose transporter subunit RbsB
KKF84759.1	maltose-binding protein		K05775	92.57	445.2	3.4e-134	maltose operon periplasmic protein	XF37_05390	-2.22415	0.000235793		maltose-binding protein
KKF83847.1	ethanolamine utilization protein EutP		K04029	82.27	159.2	1.7e-47	ethanolamine utilization protein EutP	XF37_10420	-2.22416	0.00196685		ethanolamine utilization protein EutP
KKF85669.1	type III secretory protein EscJ		K03222	204.63	206.9	9.9e-62	type III secretion protein J	XF37_00130	-2.24695	0.0236222		type III secretory protein EscJ
KKF81944.1	stress-induced bacterial acidophilic repeat motif		K06884	17.07	60.5	9.5e-17	uncharacterized protein	XF37_20150	-2.24785	0.000813398		stress-induced bacterial acidophilic repeat motif
KKF84813.1	protease		K01355	370.93	507	4.4e-153	omptin [EC:3.4.23.49]	XF37_05200	-2.28757	7.15456e-05		protease
KKF83311.1	hemolysin D		K07389	40.37	142.2	6.6e-42	cytolysin-activating lysine-acyltransferase [EC:2.3.1.-]	XF37_13060	-2.3272	0.00264567		hemolysin D
KKF84904.1	enterobactin synthase subunit E	entE	K02363	742.67	805.3	7.2e-243	2,3-dihydroxybenzoate-AMP ligase [EC:6.3.2.14 2.7.7.58]	XF37_05040	-2.35774	3.54085e-05	entE	enterobactin synthase subunit E
KKF84763.1	sugar ABC transporter substrate-binding protein	malE	K10108	378	702.2	5.2e-212	maltose/maltodextrin transport system substrate-binding protein	XF37_05410	-2.36334	1.6496e-05	malE	sugar ABC transporter substrate-binding protein
KKF80437.1	type III effector		K15352	171.33	124.7	1.2e-36	secreted effector protein PipB2	XF37_26940	-2.39025	8.55718e-05		type III effector
KKF81050.1	fumarate reductase		K00247	34.37	198.1	2.5e-59	fumarate reductase subunit D	XF37_25210	-2.45411	0.00684023		fumarate reductase
KKF80969.1	nitrite reductase		K04014	278.57	364.1	2.3e-109	protein NrfC	XF37_24765	-2.46143	0.0138751		nitrite reductase
KKF83315.1	hypothetical protein		K15974	117.4	73	9.6e-21	MarR family transcriptional regulator, negative regulator of the multid	XF37_13085	-2.49576	0.021445		hypothetical protein
KKF84912.1	enterobactin synthase subunit F	entF	K02364	1366.4	1757.2	0	enterobactin synthetase component F [EC:6.3.2.14]	XF37_05080	-2.61077	0.000396445	entF	enterobactin synthase subunit F
KKF81165.1	toxin B		K22721	119.9	22.5	1.4e-05	inositol phosphorylceramide mannosyltransferase catalytic subunit [EC:2	XF37_23910	-2.62194	0.000381135		toxin B
KKF84902.1	2,3-dihydroxybenzoate-2,3-dehydrogenase		K00216	235.17	378.2	7.2e-114	2,3-dihydro-2,3-dihydroxybenzoate dehydrogenase [EC:1.3.1.28]	XF37_05030	-2.62612	0.000143868		2,3-dihydroxybenzoate-2,3-dehydrogenase
KKF84761.1	maltose/maltodextrin transporter ATP-binding protein		K10111	514.17	608.1	2.8e-183	multiple sugar transport system ATP-binding protein [EC:3.6.3.-]	XF37_05400	-2.66767	0.00601609		maltose/maltodextrin transporter ATP-binding protein
KKF81516.1	cytochrome O ubiquinol oxidase		K07484	14.6	58.6	2.3e-16	transposase	XF37_22440	-2.66854	0.00922106		cytochrome O ubiquinol oxidase
KKF83562.1	threonine dehydratase		K01754	254.23	436.4	7e-131	threonine dehydratase [EC:4.3.1.19]	XF37_11820	-2.69576	0.0105666		threonine dehydratase
KKF80801.1	secretion protein EspO		K13793	101.7	162.3	6.4e-49	secreted effector OspE	XF37_26375	-2.75464	1.77105e-05		secretion protein EspO
KKF83338.1	enterobacterial Ail/Lom family protein		K07804	170.23	197	7.5e-59	putatice virulence related protein PagC	XF37_12920	-2.76479	0.0312487		enterobacterial Ail/Lom family protein
KKF84279.1	type III secretion protein		K22513	48.27	133	2.3e-39	type III secretion system protein	XF37_08535	-2.77059	0.0107542		type III secretion protein
KKF83476.1	hypothetical protein		K21358	362.67	19.8	8.4e-05	serine/threonine-protein kinase ULK3 [EC:2.7.11.1]	XF37_11360	-2.78509	0.000137047		hypothetical protein
KKF84805.1	ATPase		K12681	2042.3	22.9	5.5e-06	pertactin	XF37_05235	-2.80814	0.00302755		ATPase
KKF85682.1	hypothetical protein		K18984	48.1	47.2	7.4e-13	secretion system chaperone SsaE	XF37_00200	-2.8149	0.000301113		hypothetical protein
KKF84085.1	hypothetical protein		K15368	115.33	53.4	7.5e-15	secretion system chaperone SscA	XF37_08650	-2.97018	0.00177157		hypothetical protein
KKF81229.1	membrane protein		K07275	68.7	251.5	4.2e-75	outer membrane protein	XF37_24275	-3.07838	8.95903e-06		membrane protein
KKF84903.1	isochorismatase		K01252	315.5	418.3	4.9e-126	bifunctional isochorismate lyase / aryl carrier protein [EC:3.3.2.1 6.3	XF37_05035	-3.10342	1.4213e-06		isochorismatase
KKF84322.1	fimbrial protein		K07352	183.1	142.7	2.7e-42	type 1 fimbrial protein	XF37_07635	-3.11979	0.000133879		fimbrial protein
KKF84799.1	recombinase		K04763	233.77	101.4	2.3e-29	integrase/recombinase XerD	XF37_05250	-3.22097	0.00218251		recombinase
KKF81793.1	multiple stress resistance protein BhsA		K12151	91.6	144.9	2.8e-43	multiple stress resistance protein BhsA	XF37_20580	-3.30756	4.91332e-06		multiple stress resistance protein BhsA
KKF83723.1	autonomous glycyl radical cofactor GrcA		K06866	185.53	247.5	7.1e-75	autonomous glycyl radical cofactor	XF37_09775	-3.58258	1.86098e-06		autonomous glycyl radical cofactor GrcA
KKF81318.1	quinol dehydrogenase	napG	K02573	138.27	309	1.3e-92	ferredoxin-type protein NapG	XF37_23180	-3.94042	4.32436e-06	napG	quinol dehydrogenase
KKF85741.1	tryptophan permease		K03836	742.73	876.6	6.6e-265	low affinity tryptophan permease	XF37_00530	-4.01593	2.67465e-09		tryptophan permease
KKF85740.1	cysteine desulfhydrase	tnaA	K01667	668	744.8	4.1e-224	tryptophanase [EC:4.1.99.1]	XF37_00525	-4.04095	8.11242e-09	tnaA	cysteine desulfhydrase

## Sheet: O157H7_Ls-24hpi
Dataset S12. KEGG protein IDs assigned to each differentially expressed gene (DEG) using the KofamKOALA blast tool (https://www.genome.jp/tools/kofamkoala/) with a threshold E-value <10E-5. Protein accession, description, and symbol are shown, together with the corresponding KEGG ID and the blast result values [threshold, HMM (Hidden Markov Model) score, and E-value]. Information on DEGs correspo…
Protein accession	Protein description	Symbol	Kegg ID	Threshold	HMM Score	E-value	Kegg description	Gene ID	Log2FC	Adj.P.Val	Gene Name	Gene description
KKF83897.1	quinone oxidoreductase		K19267	123.77	378	2.2e-113	NAD(P)H dehydrogenase (quinone) [EC:1.6.5.2]	XF37_10705	4.83543	4.68002e-07		quinone oxidoreductase
KKF83453.1	membrane protein		K12151	91.6	74.4	2.7e-21	multiple stress resistance protein BhsA	XF37_11235	4.08464	7.88416e-07		membrane protein
KKF81793.1	multiple stress resistance protein BhsA		K12151	91.6	144.9	2.8e-43	multiple stress resistance protein BhsA	XF37_20580	4.05244	3.40608e-06		multiple stress resistance protein BhsA
KKF84346.1	transcriptional regulator		K13632	173	217.5	1.1e-65	AraC family transcriptional regulator, mar-sox-rob regulon activator	XF37_07770	3.68051	0.000100317		transcriptional regulator
KKF81318.1	quinol dehydrogenase	napG	K02573	138.27	309	1.3e-92	ferredoxin-type protein NapG	XF37_23180	3.60686	8.39359e-05	napG	quinol dehydrogenase
KKF81173.1	iron ABC transporter ATP-binding protein		K02013	259.73	275.2	2.6e-82	iron complex transport system ATP-binding protein [EC:7.2.2.-]	XF37_23955	3.21095	7.92711e-05		iron ABC transporter ATP-binding protein
KKF85213.1	phage shock protein		K03969	99.37	213	2.7e-63	phage shock protein A	XF37_03325	3.10022	0.000318391		phage shock protein
KKF85212.1	phage shock protein	pspB	K03970	30.03	105.1	4.5e-31	phage shock protein B	XF37_03320	3.02584	0.000251009	pspB	phage shock protein
KKF83338.1	enterobacterial Ail/Lom family protein		K07804	170.23	197	7.5e-59	putatice virulence related protein PagC	XF37_12920	3.01402	0.0394772		enterobacterial Ail/Lom family protein
KKF81516.1	cytochrome O ubiquinol oxidase		K07484	14.6	58.6	2.3e-16	transposase	XF37_22440	2.99946	0.00855442		cytochrome O ubiquinol oxidase
KKF83932.1	oxidoreductase		K19336	321.53	420.9	4.1e-127	cyclic-di-GMP-binding biofilm dispersal mediator protein	XF37_10890	2.97727	0.00338693		oxidoreductase
KKF82857.1	hypothetical protein		K10906	120.17	21.9	1.6e-05	exodeoxyribonuclease VIII [EC:3.1.11.-]	XF37_13845	2.95096	0.0394772		hypothetical protein
KKF85151.1	FMN-dependent NADH-azoreductase		K01118	84.33	301.4	2.5e-90	FMN-dependent NADH-azoreductase [EC:1.7.1.17]	XF37_02995	2.91079	0.0025378		FMN-dependent NADH-azoreductase
KKF83261.1	membrane protein		K03319	494.83	546.9	1.4e-164	divalent anion:Na+ symporter, DASS family	XF37_13550	2.89798	0.0122097		membrane protein
KKF85211.1	transcriptional regulator		K03973	30.9	77.1	4e-22	phage shock protein C	XF37_03315	2.81784	0.000999956		transcriptional regulator
KKF82923.1	transcriptional repressor NemR		K16137	113	160.1	4e-47	TetR/AcrR family transcriptional regulator, transcriptional repressor f	XF37_14210	2.76759	3.76385e-05		transcriptional repressor NemR
KKF85210.1	phage-shock protein		K03971	52.7	126.3	9.1e-38	phage shock protein D	XF37_03310	2.6876	0.00168703		phage-shock protein
KKF82075.1	glutaredoxin		K03674	88.8	146.7	5.7e-44	glutaredoxin 1	XF37_19680	2.62614	7.92711e-05		glutaredoxin
KKF82124.1	hypothetical protein		K12151	91.6	99.4	4.3e-29	multiple stress resistance protein BhsA	XF37_19940	2.46057	0.00803409		hypothetical protein
KKF84345.1	transcriptional regulator		K03712	118.27	205.8	1.5e-61	MarR family transcriptional regulator, multiple antibiotic resistance p	XF37_07765	2.44741	0.00803409		transcriptional regulator
KKF83895.1	iron-sulfur cluster repair di-iron protein		K07322	49.87	299.2	9.5e-90	regulator of cell morphogenesis and NO signaling	XF37_10695	2.4372	0.00521848		iron-sulfur cluster repair di-iron protein
KKF83719.1	thioredoxin 2		K03672	160.8	209.9	6.9e-63	thioredoxin 2 [EC:1.8.1.8]	XF37_09755	2.34918	0.00275695		thioredoxin 2
KKF82946.1	hypothetical protein		K04014	278.57	127.3	2.2e-37	protein NrfC	XF37_14340	2.33844	0.0322395		hypothetical protein
KKF84347.1	hypothetical protein		K13630	44.77	120.5	7.1e-36	multiple antibiotic resistance protein MarB	XF37_07775	2.2508	0.00338693		hypothetical protein
KKF83751.1	dihydropteridine reductase		K05916	274.5	550.7	8.2e-166	nitric oxide dioxygenase [EC:1.14.12.17]	XF37_09925	2.23121	0.00512089		dihydropteridine reductase
KKF81696.1	DNA utilization protein HofP		K12291	48.57	160.5	6.9e-48	pilus assembly protein HofP	XF37_22065	2.20125	0.0426871		DNA utilization protein HofP
KKF84011.1	methylmalonyl-CoA decarboxylase		K11264	275.27	440.9	4e-133	methylmalonyl-CoA decarboxylase [EC:4.1.1.-]	XF37_08220	2.17056	0.00667347		methylmalonyl-CoA decarboxylase
KKF83953.1	carboxysome structural protein EutM		K04027	141.6	158.6	4.2e-47	ethanolamine utilization protein EutM	XF37_10440	2.16204	0.0241904		carboxysome structural protein EutM
KKF83816.1	formate hydrogenlyase		K12144	449.27	447.9	3.2e-135	hydrogenase-4 component I [EC:1.-.-.-]	XF37_10265	2.1125	0.0403564		formate hydrogenlyase
KKF83571.1	pirin		K06911	33	58.2	2.8e-16	quercetin 2,3-dioxygenase [EC:1.13.11.24]	XF37_11865	2.02956	0.00900539		pirin
KKF84471.1	trimethylamine N-oxide reductase cytochrome c-type subunit		K03532	428.8	577	5.9e-174	trimethylamine-N-oxide reductase (cytochrome c), cytochrome c-type subu	XF37_06800	2.02871	0.0100419		trimethylamine N-oxide reductase cytochrome c-type subunit
KKF83661.1	aldehyde reductase		K08325	487.37	664.3	1.5e-200	NADP-dependent alcohol dehydrogenase [EC:1.1.-.-]	XF37_12350	1.97152	0.0126229		aldehyde reductase
KKF84892.1	alkyl hydroperoxide reductase		K24119	260.1	359.6	2.3e-108	NADH-dependent peroxiredoxin subunit C [EC:1.11.1.26]	XF37_04980	1.94862	0.00340124		alkyl hydroperoxide reductase
KKF81002.1	phosphonate ABC transporter ATP-binding protein		K02041	268.67	382.4	9.9e-115	phosphonate transport system ATP-binding protein [EC:7.3.2.2]	XF37_24945	1.93202	0.0197219		phosphonate ABC transporter ATP-binding protein
KKF83909.1	antitoxin ChpS		K18842	61.67	83.5	4.4e-24	antitoxin ChpS	XF37_10770	1.85539	0.0276973		antitoxin ChpS
KKF82924.1	N-ethylmaleimide reductase		K10680	508.23	543.5	1.6e-163	N-ethylmaleimide reductase [EC:1.-.-.-]	XF37_14215	1.85344	0.0146868		N-ethylmaleimide reductase
KKF82615.1	colanic acid exporter		K16695	424.33	606.5	1.2e-182	lipopolysaccharide exporter	XF37_17150	1.6923	0.0176387		colanic acid exporter
KKF81944.1	stress-induced bacterial acidophilic repeat motif		K06884	17.07	60.5	9.5e-17	uncharacterized protein	XF37_20150	1.67387	0.0426871		stress-induced bacterial acidophilic repeat motif
KKF82604.1	glycosyl transferase		K13684	224.53	536.7	1.3e-161	putative colanic acid biosynthesis glycosyltransferase [EC:2.4.-.-]	XF37_17095	1.65973	0.0490349		glycosyl transferase
KKF84168.1	electron transfer flavoprotein		K03522	281.67	37.1	5.4e-10	electron transfer flavoprotein alpha subunit	XF37_09100	1.63547	0.016681		electron transfer flavoprotein
KKF82612.1	mannose-1-phosphate guanyltransferase	cpsB	K16011	548.7	737.9	1.7e-222	mannose-1-phosphate guanylyltransferase / mannose-6-phosphate isomerase	XF37_17135	1.62481	0.0490349	cpsB	mannose-1-phosphate guanyltransferase
KKF80510.1	hypothetical protein		K09861	37.03	342.1	1e-102	uncharacterized protein	XF37_27350	1.54308	0.0268452		hypothetical protein
KKF82301.1	methylcitrate synthase		K01659	481.27	668.4	6.3e-202	2-methylcitrate synthase [EC:2.3.3.5]	XF37_18335	1.52372	0.0281888		methylcitrate synthase
KKF83521.1	protease		K08303	40.53	339.5	1e-101	putative protease [EC:3.4.-.-]	XF37_11610	1.50037	0.0407003		protease
KKF84889.1	alcohol dehydrogenase		K00148	424.03	348.4	1.2e-104	glutathione-independent formaldehyde dehydrogenase [EC:1.2.1.46]	XF37_04965	1.36724	0.0490349		alcohol dehydrogenase
KKF81986.1	alkanesulfonate transporter substrate-binding subunit		K15553	211.97	395.7	8.7e-119	sulfonate transport system substrate-binding protein	XF37_19210	1.33825	0.0374962		alkanesulfonate transporter substrate-binding subunit
KKF83057.1	serine/threonine protein kinase		K07180	365.83	804.5	2e-242	serine protein kinase	XF37_14920	-1.33143	0.0266211		serine/threonine protein kinase
KKF82971.1	oxidoreductase		K00313	301.6	595.9	1.5e-179	electron transfer flavoprotein-quinone oxidoreductase [EC:1.5.5.-]	XF37_14470	-1.37617	0.0451558		oxidoreductase
KKF83912.1	sugar ABC transporter substrate-binding protein		K23508	298.7	412.6	4.1e-124	galactofuranose transport system substrate-binding protein	XF37_10785	-1.39267	0.0478132		sugar ABC transporter substrate-binding protein
KKF85018.1	histidine ABC transporter substrate-binding protein HisJ		K10014	409.5	428.7	2.2e-129	histidine transport system substrate-binding protein	XF37_03990	-1.39709	0.0147467		histidine ABC transporter substrate-binding protein HisJ
KKF80827.1	glycerate kinase		K00865	67.67	526.6	1.7e-158	glycerate 2-kinase [EC:2.7.1.165]	XF37_26000	-1.45616	0.0426871		glycerate kinase
KKF80830.1	ureidoglycolate dehydrogenase		K00073	366.3	535.4	1.9e-161	ureidoglycolate dehydrogenase (NAD+) [EC:1.1.1.350]	XF37_26015	-1.51985	0.0455488		ureidoglycolate dehydrogenase
KKF81454.1	DDE endonuclease		K07494	67.13	195.2	5.2e-58	putative transposase	XF37_22690	-1.58502	0.0408917		DDE endonuclease
KKF81828.1	flagellar hook protein FlgE	flgE	K02390	180.9	472.1	1.1e-141	flagellar hook protein FlgE	XF37_20760	-1.59267	0.038159	flgE	flagellar hook protein FlgE
KKF84775.1	aspartate kinase		K00928	393.97	410.2	4e-123	aspartate kinase [EC:2.7.2.4]	XF37_05470	-1.59917	0.0326459		aspartate kinase
[truncated: 61 more rows]

## Sheet: STm14028s_At-4hpi
Dataset S12. KEGG protein IDs assigned to each differentially expressed gene (DEG) using the KofamKOALA blast tool (https://www.genome.jp/tools/kofamkoala/) with a threshold E-value <10E-5. Protein accession, description, and symbol are shown, together with the corresponding KEGG ID and the blast result values [threshold, HMM (Hidden Markov Model) score, and E-value]. Information on DEGs correspo…
[truncated: 2,217 more rows]

[truncated: 3 more sheets: STm14028s_At-24hpi, STm14028s_Ls-4hpi, STm14028s_Ls-24hpi]
